# Supplementary material
Source: PubMed Central journal article supplement (PMC3625320)
Supplement: 1303834110_sd01.pdf [file 1303834110_sd01.pdf]

**Data Supplement - Murphy SC et al.**  
**1,988 component *P. yoelii* liver-stage minigene library design**

| Minigene number | protein | Predicted allele | Core 9-mer peptide | Predicted affinity (nM) | Full peptide         | Minigene coding sequence                                   |
|-----------------|---------|------------------|--------------------|-------------------------|----------------------|------------------------------------------------------------|
| P1-1            | PY00024 | H2-Kd            | SFNKTTFSI          | 31.1                    | LKDSFNKTTFSFNSKY*    | CTGAAGGATAGTAGCTTTAATAAGACCACCTAGCTTCATAAATAGTAAGTACTGA    |
| P1-2            | PY00030 | H2-Kd            | YYNNNNII           | 4.56                    | QELSFYNNNNIIMDSQ*    | CAGGAGGTATCGTTCTATAATAATAACATAAACATAATAATGGACTCCCAAGTGA    |
| P1-3            | PY00030 | H2-Kd            | CYYNVSSKI          | 7.38                    | RQVSCYYNVSSKIVHCS*   | CGGCAAGTATCTTGCTACTATAACCTGAGTAGTAAGATAGTTCTTGCTCTTTGA     |
| P1-4            | PY00030 | H2-Kd            | SYDSEHSTI          | 22.63                   | LSSHYSYDSEHSTIGLRF*  | CTGAGTAGCCATAGCTATGATAGTAGCAGTACGCCATAGGCTGAGGTTTGTGA      |
| P1-5            | PY00030 | H2-Kd            | SYICNICSF          | 39.06                   | RVLDSYICNICSFNKGK*   | AGAGTGCTAGATAGCTACATCTGTAAACATCTGTAGCTTTAATAAGGGTAATATGA   |
| P1-6            | PY00033 | H2-Kd            | SYLEMDVKI          | 13.23                   | EDRLSYLEMDVKIVGKI*   | GAGGATAGACTGAGCTACCTAGAGATGGAGCTGAAGATAGTAGGTAAATATGA      |
| P1-7            | PY00033 | H2-Kd            | CYVAAGSYL          | 16.33                   | MTVNCYVAAGSYLSKFK*   | ATGACAGTGAATTGCTACGTAGCCGCGGTAGCTACCTGAGTAAATTTAAGTGA      |
| P1-8            | PY00033 | H2-Kd            | RYNVYDNEI          | 16.85                   | ETPPRYNVYDNEIODKL*   | GA AACCCACCTAGATATAACGTGTATGATAGATCCAGGATAAGCTCTGA         |
| P1-9            | PY00033 | H2-Kd            | TYNKYFDEL          | 45.12                   | SHSLTYNKYFDELVGL*    | TCGCATAGCCATAACCTATAATAAGTACTTTGATGAGCTAGTAGGTGGGCTTTGA    |
| P1-10           | PY00040 | H2-Kd            | IYMPSTDTI          | 2.67                    | GVNDIYMPSTDTIYFYG*   | GGTGTGAATGATATCTACATGCCTAGCAGCTGACACCATCTACTTTTACGGCTGA    |
| P2-1            | PY00040 | H2-Kd            | KYIDIIQSL          | 4.69                    | RKKSQYIDIIQSLPTLT*   | CGTAAAAAGTCTAAGTACATAGACATAATCCAGAGCCTGCCTACCTTAACCTGA     |
| P2-2            | PY00040 | H2-Kd            | RYINPFKTI          | 6.23                    | LLLRYYINPFKTIISGL*   | CTCCTCTTACGTAGATACATAAACCCCTTTTAAAGACCATAATTTCCGGGCTGTGA   |
| P2-3            | PY00040 | H2-Kd            | KYIEDRLNI          | 6.87                    | PETMKYIEDRLNIVFGI*   | CCTGAAACGATGAAGTACATAGAGGATAGACTGAACATAGCTTCCGGGATATGA     |
| P2-4            | PY00040 | H2-Kd            | IYNDLHSEI          | 7.44                    | IGASIYNDLHSEIFEFY*   | ATAGGAGCTTCCATCTATAATGACCTGCATAGTGAGATCTTTGAATTTCTATTGA    |
| P2-5            | PY00040 | H2-Kd            | LYLKNVYSL          | 7.99                    | KRMCLYLYLKNVYSLFVS*  | AAAAGAAATGCGCTGTACCTGAAGAACCTGAGCACCCTGTTCTCCGTGAGCTGA     |
| P2-6            | PY00040 | H2-Kd            | YYEDGFTSL          | 12.34                   | LTALYYEDGFTSLTSEI*   | CTGACCGCACTGTACTATGAGGACGGCTTCACTAGCCTGACCTTGAAATTTGA      |
| P2-7            | PY00040 | H2-Kd            | HYHRNYLQI          | 13.5                    | LQYSHYHRNYLQISLS*    | CTGCAATATAGCCCACTACCATAGAAACTACCTGCAGATCTCACTTTCTAGCTGA    |
| P2-8            | PY00040 | H2-Kd            | YYNEDSSEI          | 15.8                    | CGVFIYHRNEDSSEIIF*   | TGCGGCGTGTITTTACTATAATGAGGATAGTAGTGAGATAATAATCTTCGGCTGA    |
| P2-9            | PY00040 | H2-Kd            | FYSKYKTVL          | 16.18                   | SALLFYSKYKTVLFRSK*   | AGCGCTCTGCTCTTCTATAGTAAGTATAAGACCGTGCTGTTTGAAGTAAGTGA      |
| P2-10           | PY00040 | H2-Kd            | LYSNNNSNI          | 17.9                    | NHISLYSNNNSNIENR*    | AATCACATTTCCCTGTATAGTAATAATAGTAATAACATCGTGAACACACCTGA      |
| P3-1            | PY00040 | H2-Kd            | YFTEMISSI          | 19.36                   | LIPLYFTEMISSIRCKD*   | CTAATTTCCCTTTACTTCACTGAGATGATAAGTAGCATAGAGTGTAAAGGATTGA    |
| P3-2            | PY00040 | H2-Kd            | KYINRFNENI         | 20.44                   | KVQPSYINRFNENIEFRL*  | AAAGTCCAGCCTAGCTATAATAGATTTAATGAGAAGTGAAGCTTACGGCTGTGA     |
| P3-3            | PY00040 | H2-Kd            | KYLKRKNEI          | 21.67                   | GETRKYLYLKRKNEIGDPO* | GGTGAGACTAGAAGTACCTGAAGGAAGAAAGTGAAGTAGAGTGACCCCAAGTGA     |
| P3-4            | PY00040 | H2-Kd            | KYNNENYML          | 24.78                   | VVDYKYNNEYNLIVLEP*   | GTAGTAGTGTGAAGTATAATAATGATGATAACATGAGTACCTGACCTGACCTGA     |
| P3-5            | PY00040 | H2-Kd            | KYTWKLNII          | 25.08                   | SPSGKYTWKLNIIKEVP*   | TCGCCTAGCGGTAAAGTACACCTGGAAGCTGAACATAATAAAGGAGGTGCCGTGA    |
| P3-6            | PY00040 | H2-Kd            | FYKNYLAFI          | 25.73                   | PTREFYKNYLAFAFINI*   | CCTACACGTGAGTCTATAAAGAACTACCTAGCCTTCATCTTCAATAACATCTGA     |
| P3-7            | PY00040 | H2-Kd            | MYKENLYYL          | 28.94                   | HSVVMYKENLYYLLRVG*   | CATAGCGTAGTGATGTATAAAGGAGAAGCTGTACTACCTGCTGAGAGTAGGATGA    |
| P3-8            | PY00040 | H2-Kd            | IYYNEMQNI          | 31.05                   | ALVRIYYNEMQNLIKQEI*  | GCCTTAGTGAGGATCTACTATAATGAGATGCGAAGAACATCCTGGAACAGGAGTGA   |
| P3-9            | PY00040 | H2-Kd            | RYNSLPFSL          | 31.94                   | EDWDRYNSLPFSLAIVE*   | GAATGGGATAATAGATATAGTAGCCTGCTGCTTTAGCCTGAGAGGCTGTGA        |
| P3-10           | PY00040 | H2-Kd            | KQAPIYQSI          | 32.36                   | WCLLKQAPIYQSIQIAIV*  | TGGTGTGCTGTAAGCAGGCGCCTATCTACACGAGCATAGCTATAGTAGACTGA      |
| P4-1            | PY00040 | H2-Kd            | FYMAKKVKL          | 33.88                   | WPLSFYMAKKVKLSIVL*   | TGGCCGCTGTCTTCTACATGGCTAAGAAGGTGAAGCTGTCCATAGTACTCTGA      |
| P4-2            | PY00040 | H2-Kd            | KYNKFPYYL          | 33.94                   | AQINKYNKFPYYLVSLI*   | GCTCAAATAAATAAGTATAAAGTTCCTCTACTACCTAGTGAGTATGCTGTGA       |
| P4-3            | PY00040 | H2-Kd            | SYNKLQELI          | 35.28                   | AEKASYNKLQELIYPLT*   | GCTGAGAAGCTAGCTATAATAAGCTCGAGGAGCTGATCTATCCTCTGACATGA      |
| P4-4            | PY00040 | H2-Kd            | VYISDLIEI          | 36.95                   | TGSIVYISDLIEICSRK*   | ACTGGCTCGATAGTGATACATAAGTGACCTGATAGAGATCTGCTCTAGGAAGTGA    |
| P4-5            | PY00040 | H2-Kd            | KHINKLMYI          | 43.03                   | LHDGKHINKLMYSIRMF*   | CTGCATGATGGTAAGCACATAAACCTGAAGATGAGCATCTATAGAATTTCTCTGA    |
| P4-6            | PY00040 | H2-Kd            | IYNNQLYMI          | 46.33                   | QNWCIYNNQLYIMVMY*    | CAGAAATTTGGTGCACTATAATAACCACTGTACACATAAATCTCAATGGTCTACTGA  |
| P4-7            | PY00040 | H2-Kd            | KYSLNNNLI          | 48.73                   | GPNDKYSLNNNLNLTET*   | GGCCCTAATGATAAGTATAGCCTGAATAATAATAAAGCTGCCAAGTGAACATGA     |
| P4-8            | PY00066 | H2-Kd            | SYFNLSFLI          | 6.53                    | SGTDSYFNLSFLFLGFDN*  | TCGGGCACTGATAGCTACTTCTATAGCCTGTCTCGCTGAGGATTTAAGACTGA      |
| P4-9            | PY00066 | H2-Kd            | SFINGHYFI          | 7.83                    | VLSSSFINGHYFIRFTI*   | GTTCTGCTGCTAGCTTCAATAACCGCCCACTACTTCAATAGATTTAGTACCTGA     |
| P4-10           | PY00066 | H2-Kd            | SYICSNGFI          | 8.33                    | LKFESYICSNGIGPVM*    | CTGAAATTTGAGAGCTACATCTGTAGTAAACATAGGACATCCCGGAAGTATGTA     |
| P5-1            | PY00066 | H2-Kd            | LYFDTAALL          | 23.35                   | YOKLLYFDTAALLEYGG*   | TACCAGAAGCTGCTGTACTTTGACACCGCCGCCCTGCTAGAGTACGGGCAAGTGA    |
| P5-2            | PY00066 | H2-Kd            | NYISNNENI          | 28.29                   | EASINYISNNENIALWN*   | GAGGCCCTCAATAAACTACATAAGTAATAATGAGAACATAGCACTTTGGAATCTGA   |
| P5-3            | PY00066 | H2-Kd            | MYISKILGI          | 36.87                   | LMQTMYSIKLIGRQLS*    | CTAATGCAGACTATGTACATAAGTAAGATCCTAGGCACTAAGGCAAGCTAGCTGA    |
| P5-4            | PY00066 | H2-Ld            | SPNYFTFLM          | 36.68                   | GDEGSPNYFTFLMALPE*   | GGTGATGAAGGTAGCCCTTTCCACTTCACCTTCCTGATGGCCCTGCCCTGAATGA    |
| P5-5            | PY00067 | H2-Kd            | FPHYTFNFI          | 8.27                    | TRNEFYNYTFNFIAREAG*  | ACTAGGAATGAATTTCTATAACTACACCTTTTAACCTTCCTGAGGCGGCTGGTTGA   |
| P5-6            | PY00067 | H2-Kd            | IYFITNISI          | 9.34                    | NIIGWYIYFITNISIEETT* | AACATAGGCTGGATCTACATCTTCACTAACATAAGCATAGAAACGACATGGTGA     |
| P5-7            | PY00070 | H2-Kd            | FYINIFNFI          | 6.71                    | ILARFYINIFNFIENLEE*  | ATACTAGCACGGTTCTACATAAACATCTTTAACCTTCCTGAATCTAGAGGAATGA    |
| P5-8            | PY00070 | H2-Kd            | KMNNNISNI          | 24.56                   | ELYMKMNNNISNIMMYS*   | GAGCTCTATAGAAGTGAATAATAACATAAAGTAACATAATGATGTATAGCTGA      |
| P5-9            | PY00070 | H2-Kd            | YQHNNNINI          | 34                      | CLVAYQHNNNINITSIPA*  | TGCCCTAGACATAACGACATAATAACATAAATAACATAAGCTAGCCCGCTGA       |
| P5-10           | PY00072 | H2-Kd            | YYNYISRL           | 3.33                    | PLMLYYNYISRLKIWN*    | CCTCTGATGTTGTACTACTATAACTACATAAGTAGACTGAAATCTGGAATTGA      |
| P6-1            | PY00072 | H2-Kd            | KYVSYYNTL          | 5.25                    | EKLQKYVSYYNTLYPIV*   | GAGAAGCTACAGAAGTACGTGAGCGCTGTATAACACCCCTGTACCCCTATGATTTGA  |
| P6-2            | PY00072 | H2-Kd            | NYYSQYHI           | 8.74                    | SNQVNYYSQYHISLCI*    | TCTAACCAAGTGAACACTACTATAAGAGCCAGTACACCATCTCTGCTGATCTGA     |
| P6-3            | PY00072 | H2-Kd            | NYWCWYVNI          | 20.07                   | VELINLYWCWYVNIILNI*  | GTAGAAGCTGATAAACTACTACTGCTGGTACGCTGAACATACACCCCTGAACATTTGA |
| P6-4            | PY00072 | H2-Kd            | KYLDYAKTL          | 23.11                   | VGKKLYLDYAKTLEGLN*   | GTAGGGGGTAAAGTACCTAGACTACGCTGAAGCCCTAGAAGGACTGAATTTGA      |
| P6-5            | PY00072 | H2-Kd            | QYIPLYRTL          | 32.71                   | SGQSQYIPLYRTLTKLC*   | TCAGGACAGTCTCAGTACATCCCTCTGTATAGAACCCTGACTAAGTTGTGTTGA     |
| P6-6            | PY00072 | H2-Kd            | RYYDTKYFV          | 48.42                   | LVRSYRYDTKYFVHLHK*   | CTAGTGAGGTCTGATACATAGTACACTAAGTACTTCTGCTGATCTTCTGAAGTGA    |
| P6-7            | PY00095 | H2-Kd            | LYIENSSTI          | 3.47                    | LTALLYIENSSTIMPDV*   | CTGACAGCCTTGCTGTACATAGAGAATAGTAGCACCATAAGCCCGTAGAATTGA     |
| P6-8            | PY00095 | H2-Kd            | FYIMINTCKI         | 7.75                    | ERDDFYIMINTCKISVAL*  | GAACGTGATGATTTCTACATGATAAACACCTGTAAGATCTCCGTAGCTTTGTA      |
| P6-9            | PY00095 | H2-Kd            | FYLGKHLII          | 16.09                   | NSAAFYLGKHLIIKQEF*   | AATTCCGCCGCCCTTCTACCTGAAGGGCCACCTGATAATAAAACAAGAGTTTGA     |
| P6-10           | PY00095 | H2-Kd            | KYIGGLDVI          | 21.31                   | SPSGKYIGGLDVIYFDKK*  | AGTCCTAGCGGTGAAGTACATAGGCCGCCCTAGACTACGTTGTTGATAAAGAGTGA   |
| P7-1            | PY00095 | H2-Kd            | FYIPNSYFF          | 34.88                   | QSYIFYIPNSYFFKTRFI*  | CAGCTTTACATCTTCTACATCCCTAGTAACTCTTCTTAAGACCCGCGCTGCA       |
| P7-2            | PY00095 | H2-Kd            | KYFPDISNI          | 37.29                   | VATNKYFPDISNIDAAV*   | GTAGGCCACTAATAAGTACCCTTTTGACATAAGTAAGCATAGATGCCGCTGCTGA    |
| P7-3            | PY00095 | H2-Kd            | KQVSNCSLI          | 47.31                   | NHVDKQVSNCSLSLKPDA*  | AACCACGTAGATAAGCAGTATAGTAAATAGCTGTAGCCTGAAGCCTGACGCGTGA    |
| P7-4            | PY00109 | H2-Kd            | VYFKNQTNV          | 39.11                   | TSYIVYFKNQTNVQVPR*   | ACTAGTTATATAGTGTACTTTAAGAACCAGACTAACGTGACAGTCCCGCGCTGA     |
| P7-5            | PY00109 | H2-Kd            | NYFKKLLPI          | 44.49                   | VFGGNYFKKLLPIATPC*   | GTTTTCCGGGGTAAGTACTTTAAGAAGCTGCTGCTGCTGATGACCAACCTGTTGA    |
| P7-6            | PY00109 | H2-Ld            | HPFLSFLYF          | 29.56                   | EHASHPFLSFLYFCAAI*   | GAACATGCTAGTACCCCTTCTCTGAGCTTCTGTAATCTCTGTCGCCGCAATTTGA    |
| P7-7            | PY00110 | H2-Kd            | LYSSIRTFI          | 8.29                    | ETTFLYSSIRTFISQPC*   | GAGACCACATTTCTGTATAGTAGCATAGAAGACCTTCATCTGCCCTCAGTCTGA     |
| P7-8            | PY00110 | H2-Kd            | KYKRHFLEI          | 39.33                   | HIAPKYKRHFLEIPKVS*   | CACATAGCACCTTAAGTATAAGAGACACTTCTAGAGACTCCCTAAGTCAGTCTGA    |
| P7-9            | PY00115 | H2-Kd            | LYFENRSKL          | 10.07                   | GLWQLYFENRSKLEGS*    | GGTCTGTGGCAGCTGTACTTTGAGAAATAGAAGTAAAGCTAGAAGGTAGTAATATGA  |
| P7-10           | PY00115 | H2-Kd            | LYLRITELVT         | 20.4                    | FLVLYLRITELVTQPT*    | TTTTTAGTGTAACCTGTACCTGAGAATAAGCCAGTGAAGCTGCTAGCTTCTGAGTGA  |
| P8-1            | PY00115 | H2-Kd            | IYQNQPFPI          | 25.3                    | ARVSIYQNQPFPIAGLL*   | GCTAGAGTGAGTATCTACCAGAACCGCCCTTTTCTCATAGCTGTGCTCTGCTGA     |
| P8-2            | PY00121 | H2-Kd            | SYNNYYYNI          | 6.79                    | IMAAASYNNYYYINIVLI*  | ATAATGGCTGCTAGCTATAATAACTACTACTATAACATAAACGCTCCTGATATGA    |
| P8-3            | PY00121 | H2-Kd            | YYNYIKQOL          | 17.41                   | HLPTYYYNYIKQLTNDQ*   | CATCTTCCAACATACTACTATAACATCTATAAGCAGCTGACATGTAGACACAGTGA   |
| P8-4            | PY00130 | H2-Kd            | IYIYTGESI          | 25.29                   | VKRCIYIYIYTGESIFET*  | GTGAAGAGGTGCATCTACTACATAACCGGTGAGAGCATCTTTGAGACATTTCTGA    |
| P8-5            | PY00150 | H2-Kd            | SYVGTFHYI          | 2.49                    | RQKISYVGTFHYIKHKH*   | CGACAGAAGATAAGCTACGTAGGCACCTTCCACTACATAAAGCATAAGCACTGA     |
| P8-6            | PY00150 | H2-Kd            | KYNNNDHTLI         | 6.54                    | HTHPKYNNNDHTLITQNP*  | CATACCCACCCCTAAGTATAATAAGTACCCACCCCTGATAACTCAGAACCCTCTGA   |
| P8-7            | PY00150 | H2-Kd            | SYFNGQENL          | 6.92                    | VRTTYSYFNGQENLSGIA*  | GTTCCGCACTACTAGCTACTTTAACGGCCAGGAGAACCTGAGTGGCATAGCATGA    |
| P8-8            | PY00150 | H2-Kd            | VYKNSQSIS          | 7.36                    | IVFTYVYKNSQSINKIPA*  | ATAGTCTTCAACCGTGTACTATAAAGTAAAGCCAGGACATAAAGCTGCATGA       |
| P8-9            | PY00150 | H2-Kd            | YYMTKAIKI          | 12.21                   | GLTKYYMTKAIKISYKKA*  | GGGTTGACTAAATACTACATGACTAAGGCCGATAAAGATCTCTTAATAAGGCTTGA   |
| P8-10           | PY00150 | H2-Kd            | QYAKNNNSI          | 14.41                   | PEEPQYAKNNNSIKLYE*   | CCTGAGGAGCCTCAGTACGCTAAGAAATAATAAGCATAAAGCTCTATAGAGTGA     |
| P9-1            | PY00150 | H2-Kd            | IYHEILSII          | 15.18                   | SFIAIYHEILSIIIGWIO*  | TCCTTCAAGCAATCTACCATGAGATCTGTAGCATATAAGGTTGGATTCAATGA      |
| P9-2            | PY00150 | H2-Kd            | WYIQKYLNI          | 15.44                   | EVECWYIQKYLNIWQGI*   | GAGGTAGAGTGTTGGTACATCCAGAAGTACCTGAACATCTGGGGGCGAGATTGA     |
| P9-3            | PY00150 | H2-Kd            | NYMASHKNLI         | 15.51                   | GKDNMYMASHKNLIALL*   | GGTAAGAGATAATAACTACTAGCTAGCCATAAGACATAAGCCTTCTAGGCTGA      |
| P9-4            | PY00150 | H2-Kd            | YYTYTNIYI          | 16.27                   | NLDLYTYTNIYISAKI*    | AACCTAGACCTGTACTACACCTACACTAACATCTACATAAGCGCTAAAACTCTGA    |
| P9-5            | PY00150 | H2-Kd            | TYFQYKINI          | 18.02                   | REMATYTYFQYKINIACNC* | CGTGAAATGGCCACCTACTTCCAGTATAAGATAAAGCATAGCCTGTAATTTGCTGA   |
| P9-6            | PY00150 | H2-Kd            | NYANYINFI          | 18.16                   | NLCANYANYINFIPIGFS*  | AACCTTTGTGCTAACTACGCTAACTACATAAAGCTTCTACCTCCGCTGCTTTTGA    |
| P9-7            | PY00150 | H2-Kd            | FYIKIMNKI          | 19.18                   | LFLVYFYIKIMNKIVLFL*  | CTGTTCTGATGTTTCTACTATAAGATAATGAATAAGATAGTCTTGTCTTCTGA      |
| P9-8            | PY00150 | H2-Kd            | LYIENFFLI          | 22.99                   | LVPKIYIENFFLSSNK*    | TTAGTGCCCTAAAACTACATAGAGAAATGACTTCTTCTGCTGCTAGTAAGTGA      |
| P9-9            | PY00150 | H2-Kd            | RYFYMVVHNI         | 23.04                   | LLQEYHYFYMVVHNIYFTA* | CTCCTCCAAGAATAACCACTTCTACATGGTGCATAAACATCTAATTTACTGCTTGA   |
| P9-10           | PY00150 | H2-Kd            | YHYWYVYKEI         | 29.11                   | SVKSRYHYWYVYKESIRTT* | AGCGTGAAGTGTAGACTAGTGGTACGTGTATATAAGGAGATCTTCCGAGCAAGTGA   |
| P10-1           | PY00150 | H2-Kd            | IYYYSNPNI          | 33.9                    | MREMIYYYSNPNLNVDP*   | ATGCGTGAAGTATGATCTACTACTATAGTAGCCCTAACCTGAACGTAGACCCCTGA   |
| P10-2           | PY00150 | H2-Kd            | FYLNVERNI          | 34.76                   | GPLPFYLNVERNINISSA*  | GGACCTCTCCCTTTCTACCTGAACATGAGAGAAACATAAGCTCTAGTGCCTGA      |
| P10-3           | PY00150 | H2-Kd            | KYIKKEHTM          | 37.68                   | RVEKKYIKKEHTMRETM*   | CGGGTAGAAAAAAGTACATAAAGGAAGGACACACCTGAGGGAGCAAGCATGTGA     |
| P10-4           | PY00150 | H2-Kd            | GFKYKNTSL          | 39.1                    | LVGLGFKYKNTSLHAKMI*  | TTAGTAGGACTAGGCTATAAAGAAAGACACTAGCACCTGCATCAGAAGCTGTGA     |
| P10-5           | PY00150 | H2-Kd            | WFCNCSFNI          | 42.22                   | AHGSWFCNCSFNIAWLI*   | GCCACGCGTAGCTGGTTTAACTGTAGCTTCTTAACTCTATAGCCTGGATGATCTGA   |
| P10-6           | PY00150 | H2-Kd            | KMILIVSSI          | 45.61                   | LNLSKMILIVSSIDITH*   | CTGAATCTGAGTAAGATGATCCTGATAGTGAGTAGCATAGATACACACCAATTGA    |
| P10-7           | PY00150 | H2-Kd            | YYIVITLTI          | 47.18                   | LMLPYYYIVITLIRPVD*   | CTAATGCTGCCTTACTACTACATAGTAGTGAACACCTGAGGCGGATAGATTGA      |

|        |         |       |             |       |                      |                                                             |
|--------|---------|-------|-------------|-------|----------------------|-------------------------------------------------------------|
| P10-8  | PY00150 | H2-Kd | NQYNTISFI   | 48.6  | NFLSNQYNTISFIPFHT*   | AATTTTCTGAGTAACCCAGTATAACACCATAAGCTTCATCCCCATCCATACGTGA     |
| P10-9  | PY00150 | H2-Ld | MPERNFDDQM  | 24.06 | SRKCMERNFDDQMHRPV    | TCTAGAAAGTGCATGCCCTGAGAGAACTTTGACCAGTATGCAAGGCCCGGTGA       |
| P10-10 | PY00150 | H2-Ld | TPHHYHYFV   | 40.93 | RPODTPHHYHYFVKEQR    | CGGCCGAGGACACCCCTCACCTACCACTACTGATTAAGTGAAGGTGA             |
| P11-1  | PY00154 | H2-Kd | QYSPSPRETI  | 14.89 | EVGGQYSPSPRETIQGLN*  | GAACTAGGAGGCCAGTATAGCCCTAGTAGAGAGACCATCCAAGGCTTAAATTGA      |
| P11-2  | PY00155 | H2-Kd | KYSINLCDI   | 5.25  | ISELKYSINLCDIQAY*    | ATCTCTGAACTGAAGTACATAAGTAACCTGTGTGACATCCAGTACGCATTTGA       |
| P11-3  | PY00155 | H2-Kd | KYYPVTVPVL  | 5.34  | TRPPKYYPVTVPPLHISE*  | ACCCGCCACCTAAGTACTACCCCTACCGTAGTGCCTGATGATTAAGTGAATGA       |
| P11-4  | PY00155 | H2-Kd | LYNKVSEYL   | 46.28 | SENVLYNKVSEYLFASS*   | TCTGAGAACGTGCTGTATATAAAGTGAGTGAGTACCTGTTTGCCTAGCTCCTGA      |
| P11-5  | PY00183 | H2-Kd | NYASSTTPI   | 10.51 | EASLNYASSTTPIIFLI*   | GAGGCTAGTCTGAACCTACGCTAGTAGACACCCCTATAAATCTCTTACGATTTGA     |
| P11-6  | PY00183 | H2-Kd | KYSEININDI  | 18.61 | KMTGYKSEININDIRRLP*  | AAAATGACAGGTAAGTATAGTGAGAACATAAATGACATAAAGACGCCCTTATGA      |
| P11-7  | PY00183 | H2-Kd | YYKNYLNIGI  | 22.97 | GASFYKYNLYNIGLYWVS*  | GGCGCTTCGTTCTACTATAAGAACTACCTGAACGCCGCTCGTATTGGTCACTGA      |
| P11-8  | PY00183 | H2-Kd | NYNKNHNPL   | 42.66 | TLELNYNKNHNPLFPTR*   | ACGTTAGAGTTGAACTATAATAAGAACCAATACCCCTGTGTTCCCACTAGATGA      |
| P11-9  | PY00183 | H2-Ld | IPNINFANI   | 26.47 | SLHSIPNINFANIYFGE*   | AGCCTACACTCCATCCCTAACATAAACTTCGCTAACCTATTTCCTGGTGAATGA      |
| P11-10 | PY00188 | H2-Kd | GYLGEFSI    | 14.42 | DVASGYLGEFSISEIG*    | GACGTAGCGTCCGGCTACTACCTAGGTGAGTTTAGCATCTCTGAAATAGGATGA      |
| P12-1  | PY00194 | H2-Kd | NYINNHIQI   | 4.39  | QTLKNYINNHIQIYVKP*   | CAAAACCTGAAGAACTACATAAATACATCCACCAGATCTATGTGAACACCTTGA      |
| P12-2  | PY00194 | H2-Kd | FYDPNYSTL   | 5.78  | SDFDYDPNYSTLGRQK*    | AGTGACTTTGACTTCTATGACCCTAATATAGCACCCCTAGGCGGACAGAAATGA      |
| P12-3  | PY00194 | H2-Kd | SYIQEAGNI   | 25.93 | YTFNSYIQEAGNIVNLA*   | TACACATTTAATAGCTACATCCAGGAGGCCGCTAACATAGTAGTAAGTACCTTGA     |
| P12-4  | PY00194 | H2-Ld | IPYIMNLTLN  | 14.34 | ICPSIPIYMNLTNLKTGF*  | ATCTGTCCCTAGCATCCCTTACATGAACCTGACTAACCTGAAGACCCGGCTTCTGA    |
| P12-5  | PY00230 | H2-Kd | VYIKNLVNI   | 8.47  | SQGDVYIKNLVNIEMDVN*  | AGTCAAGGTGACGTGTACATAAAGAACCTAGTGAACATAGACGGCGTGAACCTGA     |
| P12-6  | PY00230 | H2-Kd | KYLGFVFI    | 8.87  | RISVKYILGFVFIYMG*    | AGGATTTTCGGTGAAGTACATCCTAGGCTTCTTCGTGATCTATTGAATGGGTGA      |
| P12-7  | PY00230 | H2-Kd | YYILNRVKI   | 9.08  | SLPPYYILNRVKIGNRA*   | TCACTGCCACCTTACTACATCCTGAATAGAGTGAAGATAGGTAATAGAGCTTGA      |
| P12-8  | PY00230 | H2-Kd | SYADTVLNI   | 18.98 | FGKKSADTVLNLKRA*     | TTTGGTAAGAAAAGCTACGCTGACACCGTGTCTGAACATAAAGCCGCGCCAGTGA     |
| P12-9  | PY00230 | H2-Kd | SYPSYLSKL   | 37.09 | WGQESYPSYLSKLAIHS*   | CAGTGGGGTGAAGAGCTACCCCTTATAGCTGTAGTAAGCTAGGCTCTCACACTGA     |
| P12-10 | PY00230 | H2-Kd | KYPDNFHFI   | 48.04 | SLSLKYPDNFHHKIAL*    | TCCCTATCCCTGAAGTACCCTGATAACCTTCTCCACATGAAGTCCCGCTCTCTGA     |
| P13-1  | PY00232 | H2-Kd | KYLAIVCVI   | 24.87 | LLRGYLAIVCVILFQV*    | TTTACTAGGACCGCGCTACCTAGCCATAGTGTGCGGTGATCTTCTCCAGGATTGA     |
| P13-2  | PY00232 | H2-Kd | RYFKDPPELI  | 31.68 | CRAIRYFKDPPELISPE*   | TGTAGAGCCATAAGATACTTTAAGGACCCGTAGGCTAGCTCCTGAGCCCTGAGTGA    |
| P13-3  | PY00238 | H2-Kd | YYNVTYFYL   | 8.02  | PLEAAYNVTYFYLAL*     | CCTCTAGAAGCTTACTATAACGTGACCTACTCTTCTGCTGTCTGCTCAATCTGA      |
| P13-4  | PY00238 | H2-Kd | YYLFKEKNI   | 22.46 | ANIFYYLFKEKNIIDTCT*  | GCTAACATTTTTTACTACCTGTTTGAGAAGAACATAAATACTGATTGCACTTGA      |
| P13-5  | PY00238 | H2-Kd | IYLFVNIHL   | 39.46 | KQQAIFYLFVNIHLAISY*  | AAGCAGCAAGCTACTACTGCTTCTACATAAACCTGATGCTATCTCTCTATTGA       |
| P13-6  | PY00248 | H2-Kd | YWFLPIHMI   | 12.79 | EQDPYWFLPIHMIYRCY*   | GAGCAAGACCCCTTACTGGTTCCTCTGATCCACATGATAGTGAGGTGCTACTGA      |
| P13-7  | PY00248 | H2-Kd | NYHLMWYQI   | 46.09 | YVEPNYHLMVYQIALK*    | TACGTAGAACCCTAACCACCTGATGGTGTACCAGCTATGACCTGAAGTGA          |
| P13-8  | PY00252 | H2-Kd | KYFSTLMNL   | 4.67  | KVIPKYFSTLMNLILNP*   | AAAGTAATTCCTAAGTACTTTAGCACCCCTGATGAACCTGACCTTAAACCCCTGA     |
| P13-9  | PY00252 | H2-Kd | YMFDFGSFI   | 9.73  | NOQAVYMFDFGSFITYRD*  | AATCAGGCTGTGTACATGTTTGACGGCTTGTAGCTTCTATACAGTATAGAGATTGA    |
| P13-10 | PY00286 | H2-Kd | FYLSYSFHL   | 16.32 | YKGTFLYSYSFHLSPST*   | TATAAGGGCACCATTCTACCTGAGCTAGTACCTTCCACCTGTCTCCCACTAGCTGA    |
| P14-1  | PY00286 | H2-Kd | SYSFHLPI    | 19.75 | IAYQSYSFHLPIWSDI*    | ATAGCCTACCAGAGCTATAGCTTCCACCTGATCCCTATCTGCTGTGATATCTGA      |
| P14-2  | PY00290 | H2-Kd | KYSSTFSLI   | 5.06  | VKTPLYKYSSTFSLIELGH* | GTGAAGACTCCACTGTACTTTAAGAGCTATAGCCTGATGAATAATTAGGACTATGA    |
| P14-3  | PY00290 | H2-Kd | FYLSLIHLR   | 8.61  | WRFEFYLSLIHLRFLKPA*  | TGGCGTTTTGAGTCTACATAAGCCTGATCCATAGACTGTAAAGCCGCCCTGA        |
| P14-4  | PY00290 | H2-Kd | TYNINCALL   | 10.22 | KTTTTYFNINCALLNFT*   | AAAACCTACTACGACCTACTTTTAATAACTCGGCCCTGCAACTTCAACCTCTGA      |
| P14-5  | PY00290 | H2-Kd | KYIKADNIL   | 14.73 | ERFIKYIKADNILFERW*   | GAACGTTTTTATAAGTACATAAAGGCTGATAACATCCTGTTTGAGCGGTGGTGA      |
| P14-6  | PY00290 | H2-Kd | NYFYFISLI   | 16.82 | LQLRNYFYFISLIQLDH*   | CTGCAACTCCGTAACTACTACTTCTACATAAGCCTGATCCAGTTAGATCACTGA      |
| P14-7  | PY00290 | H2-Kd | NYINTKNYL   | 22.01 | AKNKNYINTKNYLDARV*   | GCTAAGAATAAAGAACTACATAAACACTAAGAACTAGCTAGACGCCCGAGTTTGA     |
| P14-8  | PY00290 | H2-Kd | KEMSVIYFI   | 41.59 | QLKNKEMSVIYFIAHQR*   | CAGTTGAAGAATAAAGGAGATGAGCGGTGATCTACTTCTATAGCTCATCAGCGGTGA   |
| P14-9  | PY00293 | H2-Kd | AYIKTQGVFI  | 28.72 | FWAPAYIKTQGVILFYA*   | TTCTGGGCCCCAGCCTACATAAAGACCCAGGGCGGTGATCCTCTTTACGCATGA      |
| P14-10 | PY00293 | H2-Kd | KAFAFISYI   | 44.29 | IEYPKAFAFISYIVGRG*   | ATAGAGTATCCTAAGGCCCTTCGCCCTTCATAGAGCTACATAGTAGGCCGCGGTGA    |
| P15-1  | PY00331 | H2-Kd | IYFHNIFLI   | 3.59  | RKIQIYFHNIFLIHMLGT*  | CGTAAGATCCAGATCTACTTCCATAACTTCCACACCCCTGATGGCACTGACATGA     |
| P15-2  | PY00331 | H2-Kd | KYINIESLI   | 4.5   | FIQCKYINIESLIALAV*   | TTTATCCAGTGAAGTACATAAACATAGAGACCCGTATAGCTCTGACGATGTGA       |
| P15-3  | PY00331 | H2-Kd | SYSSYLNNI   | 5.98  | MYTDSYSSYLNINPVLR*   | ATGTACACTGATAGCTATAGTACTCTGATAAATACATCCAGCTGCTGAGGTGA       |
| P15-4  | PY00331 | H2-Kd | KYHLESEI    | 7.59  | VGGAKYHLESEINILL*    | GTAGCGCGAGCTAAGTACGTGCACCTGAGAGTGAAGTGAATAAACGGCGTCTGTTGA   |
| P15-5  | PY00331 | H2-Kd | IYFISPPFI   | 8     | QCYSYHISFPPIPKKF*    | CAGTGTCTATTCTCACTACATAAAGCTTCCTCCTTTCTATCCCAAGAAGTTTGA      |
| P15-6  | PY00331 | H2-Kd | FYDFKSFYI   | 10.7  | NDLGFYDFKSFYIHGVP*   | AATGATCTAGGTTTTCTACTTTTGATAAGAGCTTCTCATCTCCAGCGCTTCGTGTGA   |
| P15-7  | PY00331 | H2-Kd | IYFISLSLI   | 11.41 | KTGGIYFISLSIDYLI*    | AAAACCTGGTGAATCTACTTTAGCATAAGCCTGAGCATAGACTACCTATATTGA      |
| P15-8  | PY00331 | H2-Kd | KYSSTFLKI   | 11.68 | QVIAKYSSTFLKIALHA*   | CAGGTGATAGCTAAGTATAGTAGACCTTCCCTGAAGATGAGCTGACGCGTTGA       |
| P15-9  | PY00331 | H2-Kd | KYNSSGFYL   | 15.86 | GVGDYKNSSGFYLKCTL*   | GTAGGTGTAGATAAGTATAATAGTAGCGGCTTCTACCTGAAGTGCACGTTATGA      |
| P15-10 | PY00331 | H2-Kd | LYIDYVYSL   | 16.19 | ASCMLYIDYVYSLTLT*    | GCTAGTTGCATGCTGTACATAGACTACTAGCTGACCTGACCTGACCACTTTTGA      |
| P16-1  | PY00331 | H2-Kd | KYILFLEIY   | 22.04 | FOAGKYILFLEIYSTFL*   | TTCCAGGCTGGTAAGTACATCTTCTAGAGATCTACATCTCAACATCTTGTGA        |
| P16-2  | PY00331 | H2-Kd | IYQNAKNI    | 24.03 | VPLPIYQNAKNKISQVR*   | GTTCCTCGCTGACTTACTACCAGAACGCTAAGAATAAGATGCTCAACAAGTCTGTTGA  |
| P16-3  | PY00331 | H2-Kd | FYQNKYKYL   | 24.76 | RASEFYQNKYKYLISLY*   | CGGGCGTCTGAGTTCTACCAGATAAAGAGTACTACCTGTCACTGAGCTATTGA       |
| P16-4  | PY00331 | H2-Kd | NYFNYSVGV   | 36.92 | IAYGNYFNYSVGSVAISA*  | ATAGCATACGGTAAGTACTTTAATAGCTATAGAGCGGCTAGCTATATTGCGCTGA     |
| P16-5  | PY00331 | H2-Kd | KYLAFFFLF   | 45.89 | KGTFKYLAFFFLIFSP*    | AAGGGCACGTTTTAAGTACTACCTAGCCTTCTTCTTCTGATCTTCTTGCTTGA       |
| P16-6  | PY00331 | H2-Kd | IYIRYIYEL   | 48.22 | SQFKIYIRYIYELIEDHR*  | TCACGATTTTAAGATCTACATAAGATACTACATAGAGCTAGAGAACACCCGCTGA     |
| P16-7  | PY00333 | H2-Ld | SPKLNFIITL  | 26.97 | SPASSPKLNFIITLALP*   | AGCTCTGCGTCTAGCCCTAAGCTGAACCTTCATAACCCCTAGGCGCTTCCCTCGA     |
| P16-8  | PY00361 | H2-Kd | KYAWNLDKL   | 18.36 | KKDKYAWNLDKLFQMS*    | AAAAAGAAAGGATAAGTACGCGCTGGGTGCTAGATAAGCTGACGTTTCAAGTTGA     |
| P16-9  | PY00398 | H2-Kd | KYKNIFENL   | 43.68 | NRDRKYKNIFENLFGAT*   | AATAGGATAGAAGTATAAAGAACATCTTGAAGACCTGTGACACCCCTGGA          |
| P16-10 | PY00433 | H2-Kd | SYQNNYNRI   | 3.57  | DSRYSYQNNYNRIKTN*    | GATTCTAGGTATAGCTACCAGAATAACTATAAGATACTCTGAAAACCTAAGTGA      |
| P17-1  | PY00433 | H2-Kd | IYITYCTNI   | 4.69  | FLEIYITYCTNIPCEK*    | TTCTGTTAGAGATCTACATAAACCCTACTGCACATAGCATCCCTGTGAGAAATGA     |
| P17-2  | PY00433 | H2-Kd | NYFPMCLSI   | 4.75  | PDNLNYFPMCLSIEPFS*   | TTGCTGACCTGAAGTACTTCCCTATGTGCGCTGAGCATAGAACCTCTTATTGTTGA    |
| P17-3  | PY00433 | H2-Kd | KYKHILNLI   | 8.94  | RNITKYKHILNLIKGI*    | CGTAACATAAATAGTACTTTAAGCACATCTCTGAACCTGATAAAGGGCATATGA      |
| P17-4  | PY00433 | H2-Kd | YYSDQNTIS   | 17.05 | ERVGYSDQNTISGWGE*    | GAAAGAGTAGGCTACTATAGCATAGACCAAGACCAACCTAAGCGGCTGGGAATGA     |
| P17-5  | PY00433 | H2-Kd | KYNRILLSL   | 18.67 | KQPQKYNRILLSLDPM*    | CAGAAGCCTCAGAAGTATAATAGAATACTCTGAGCCTGAAGGATCCATATGTA       |
| P17-6  | PY00433 | H2-Kd | LSHRYLFNMHI | 22.02 | LSHRYLFNMHIILDP*     | CTGTACACCCGGCTGTACTTCTCATGTGTAAACACATACCTAGTACCACTGTGA      |
| P17-7  | PY00433 | H2-Kd | TYINKLMKI   | 24.43 | GKYGTYINKLMKIYPTD*   | GGTAAGTATGTTACCTACATAAATAAGCTGATGAAGATCTACCCTGATACCTGA      |
| P17-8  | PY00433 | H2-Kd | YFLWNPHTL   | 29.04 | FERDYFLWNPHTLWVND    | TTTGAACGTGACTACTTCTGTGGAACCCCTACACCCCTGTGGTGAATGATTGA       |
| P17-9  | PY00433 | H2-Kd | YYSQFYISL   | 42.53 | QDWAYYSQFYISLSESV*   | CAGGATTGGGCGTACTATAGCCGTTCTACATAAAGTACTACCTGATCAACTCCGTATGA |
| P17-10 | PY00444 | H2-Kd | KYFNSLIDL   | 7.42  | WSTLYKFSNLDILFQER*   | TGGAGTACACTGAAGTACTTTAGTAACCTAGACATCCTGTTTCAGGAAGCTGAATGA   |
| P18-1  | PY00444 | H2-Kd | SYTOQVFWKI  | 10.77 | ANYYSYTOQVFWKIEDVE*  | GCTAATTACGTGAGCTACACCCAGGTGTTCTGGAAGATAGAGGACGATGAATGA      |
| P18-2  | PY00444 | H2-Kd | FYLSILGAI   | 14.45 | FLSHRYLSILGAIPTHO*   | TTTCTTTCTATAGATACCTGAGCATCTCTAGGCGCCATCCCAACACACAGTGA       |
| P18-3  | PY00444 | H2-Kd | RYGKITYSI   | 15.05 | PDRHFYRGKITYSISSTV*  | CCTGATCGGACTTCTACGGTAAAGATAACCTATAGCATCTCTCCTACCGTCTGA      |
| P18-4  | PY00444 | H2-Kd | SWIYVLTLI   | 20.32 | DEPOSWIYVLTLEIUGGP*  | GATGAGCCACAGAGCTGGATCTACGTGCTGACCCCTGATAGAAGGAGGCCGCTGA     |
| P18-5  | PY00444 | H2-Kd | YYIKNNYIM   | 49.52 | GSFVYYIKNNYIMGOSQ*   | GGTCTCTTTGTGTACTACATAAATAAGTATAAATACTAGGACGACTCTCACTGA      |
| P18-6  | PY00444 | H2-Ld | FPSITAHIF   | 37.88 | TGYGFPSITAHIFGVCC*   | ACCGGGTACGGGTTCCTAGCATAACCGGCCACATCTTCGGTGTATGTTGTGA        |
| P18-7  | PY00454 | H2-Kd | AYMNAVDIL   | 26.74 | SSTDAYMNAVDILPAFT*   | AGTAGCACTGACGCTACATGAACGCCGTAGACATCTCTGCCAGCTTCCACCTGA      |
| P18-8  | PY00463 | H2-Kd | KYKGATWLL   | 47.74 | GHMKYKGATWLLHFYS*    | GGTCATATGCAGAAGTATAAAGGGCGCACCTGGCTGCTGCACTTCTATTCTGTGA     |
| P18-9  | PY00479 | H2-Kd | KYFFHNNFI   | 2.66  | HLNLKYFFHNNFIAETE*   | CATCTGAATCTGAAGTACTTCTTCCATAAATAAATCTTACAGCCGCCACTGAATGA    |
| P18-10 | PY00479 | H2-Kd | SYINATQSI   | 2.73  | YLDESINATQSIGCELG*   | TACCTAGATGAAGTACATATAACGCCACCCAGACAGCATCTGTGAGCTAGGGTGA     |
| P19-1  | PY00479 | H2-Kd | YYILNIYFTI  | 3.79  | AEISYILNIYFTISEEF*   | GCTGAAATATCCTACTACCTGAACATCTACTTACCATAAGCTGAAGAATCTCTGA     |
| P19-2  | PY00479 | H2-Kd | SYIRLYYFI   | 6.43  | LVSTSYIRLYYLIQFN*    | CTAGTGAGTACTAGCTACATAAGATAACCTGTGACCTGATCTAATCTCAAAATTGA    |
| P19-3  | PY00479 | H2-Kd | YYHNILENL   | 11.05 | KNARYYYHNILENLIDQR*  | AAAAATGCCCGCTACTACCATAACCTCTAGAGAACCTGATCCGAATAGATTGA       |
| P19-4  | PY00479 | H2-Kd | YYIKNNITIA  | 15.68 | YDLSSYYIKNNITTIAT*   | TATGATCTATCCTTACTACATAAAGAATAAATAAGAACATAACCAACATAGCATGA    |
| P19-5  | PY00479 | H2-Kd | KYMEKCLKHL  | 22.55 | ECVEKYMEKCLKHLGCQA*  | GAGTGCCTAGAGAAGTACATGGAGAAGCTGAAGCACCTAGGATGTGACGCATGA      |
| P19-6  | PY00479 | H2-Kd | QYRNMFNVI   | 42.39 | APAAQYRNMFNVIPTQT*   | GCCCCGCCGCTCAGTATAGAACATGTTTAACTGTGATCCCAACAGACCACTGTA      |
| P19-7  | PY00479 | H2-Ld | RPLNLSTLV   | 18.6  | LLETPLNLSTLSTVD*     | CTCCTAGAGACTAGACCTCTGATAAACCTGAGCAGCTGCTCAACTGTAGATTGA      |
| P19-8  | PY00487 | H2-Kd | SYYKCHENI   | 13.13 | TKRRSYYKCHENIDVVR*   | ACTAAGCGCCGTAGCTACTATAAAGAAGCATGAGAACATAGAGCTAGTGCCTGA      |
| P19-9  | PY00487 | H2-Kd | FYFNNKDLA   | 25.19 | YLPEFYFNNKDLDAPE*    | TACCTCGCTGAGTTCTATAACCCCTAATAAGGATAAGCTAGACAGCTGCTGAATGA    |
| P19-10 | PY00487 | H2-Kd | FYNNSGEYL   | 26.28 | TVSDFYNNSGEYLLDGO*   | ACAGTGTCTGATTTCTATAATAAGCGGCTGAGTACCTAGGTCTAGACCAATGA       |
| P20-1  | PY00487 | H2-Kd | KYLDLQNDI   | 49.21 | LAFOKYLDLQNDICNHT*   | CTAGCATTCAGAAAGTACCTGACGCTGCAAGATGACATCTTACACCAACTGA        |
| P20-2  | PY00487 | H2-Ld | YPSVSNANSF  | 19.91 | IQREYPSVSNANSFDLLV*  | ATCCAGCGTGAGTACCCTGTGAGTAAACGCTAATAGCTTTGATCTGTAGTCTGA      |
| P20-3  | PY00538 | H2-Kd | IYNNFLES    | 40.99 | DADNIYNNFLESFYQAP*   | GACGCTGATAATATCTATAAATCTCTAGAGAGCGCTGTACCAAGGCCACCTGA       |
| P20-4  | PY00543 | H2-Kd | KYFPNAKLI   | 7.68  | PGLIKYFPNAKLIERTG*   | CCAGGAATACTAAGTACTTCCCTAACGCTAAGCTGATAGGACAGCCGCGTGA        |
| P20-5  | PY00543 | H2-Kd | SYNGCITWL   | 8.09  | SQMTSYNGCITWLEGIN*   | TACCAAACTAGCTAGCTATAACTCGGCCCATACCTGGCTAGAAGGCATAAATTGA     |
| P20-6  | PY00543 | H2-Kd | IYLYNTMVI   | 15.09 | RDYLIYLYNTMVIETGI*   | CGTGACTATCTAATCTACCTGTATAACACCATGGTGTAGTACCAAGGCATCTGA      |
| P20-7  | PY00544 | H2-Kd | YYRILSTL    | 3.21  | ETEPYYYRILSTLAGQY*   | GAAACTGAACCCCTACTACGTGAGAATCCTGAGCACCCCTAGCCGCCCAACTGTA     |
| P20-8  | PY00544 | H2-Kd | KYYSQISEL   | 5.1   | FKPTKYYSQISELFPHE*   | TTTAAGCCGACTAAGTACTATAGCCAGATAAGTGAAGCTGCTTTCATGAACCTTGA    |

|        |         |       |            |       |                     |                                                            |
|--------|---------|-------|------------|-------|---------------------|------------------------------------------------------------|
| P20-9  | PY00576 | H2-Kd | TFIRSYQYI  | 31.85 | GTRATFIRSYQYIQGTH*  | GGAACCCGAGCCACCTTCATAAGAAGCTACCAGTACATAGGTCAGACACACTGA     |
| P20-10 | PY00598 | H2-Ld | YPLYSYFIF  | 12.84 | RDRGYPLYSYFIFLHKL*  | CGTGACCCGAGGATACCCCTCTGTATAGCTACTTCATCTTCTCGTCAATAGCTGTGA  |
| P21-1  | PY00619 | H2-Kd | SYNNYLDYI  | 6.07  | RVDQSYNNYLDYIKLL*   | AGAGTAGATCAGAGCTATAATAACTACCTAGCTAGACTACATAAGCTCCGCTTTGA   |
| P21-2  | PY00619 | H2-Kd | KYTPNFMIL  | 12.17 | LHDNKYTPNFMILPPNY*  | TTGCATGATAATAAGTACACCCCTAACTTCATGATCGTGCCTCCTAACTACTGA     |
| P21-3  | PY00619 | H2-Kd | RYNKLNLPI  | 15.95 | GHKVRYNKLNLPICYII*  | GGGCATAAGGTGAGATATAATAAGCTGAACCTGCCTATCTGCTACTACTATCTGA    |
| P21-4  | PY00619 | H2-Kd | KYFDPVLNI  | 16.31 | KLAQKYFDPVLNINCSP*  | AAACTAGCGCAAAAGTACTTTGACCCCTGTGCTGAACATAAAATGTTCCCATATGA   |
| P21-5  | PY00619 | H2-Kd | HYNSYNNYL  | 18.8  | RKEFHYSYNNYLLARL*   | AGAAAAGGATGCCACTATAATAGCTATAATAAAGCTAGCTAGCTAGGCTTTGA      |
| P21-6  | PY00619 | H2-Kd | RYYSFLALI  | 18.86 | AHFPRYYFLALITSGF*   | GCCCATTTCCCTAGATACTATAGCTTCCGTACGCCCTAGATCAACTAGGCTTCTGA   |
| P21-7  | PY00619 | H2-Kd | HYMYMNYNV  | 21.9  | PFLQHYMYMNYNVKHA    | CCCTTTTCCCAACACTACATGATACAGTAACTATAACAGTAGTGAACACTGCTTGA   |
| P21-8  | PY00619 | H2-Kd | RYFVIGHI   | 26.47 | PLDRRYFVIGHIGONS*   | CCACTAGATAGGAGATACTTCGTGATAATAGGCCACATAGCAACCAAAATCTCTGA   |
| P21-9  | PY00619 | H2-Kd | MYMNYNVFV  | 34.74 | SSLIMYMNYNVFAKTP*   | TCTAGCCTGATAATGTACATGAACATAAACGTGTTCTGATAGCTAAACAGGCTGA    |
| P21-10 | PY00619 | H2-Kd | CYIQKSPLI  | 37.41 | PTQYCYIQKSPLIQVPV*  | CCTACCCGATTTGCTACATCCAGAAGCGCCTCTGATCCAGCCCGTCCCTCTGA      |
| P22-1  | PY00619 | H2-Kd | NYFRNRDPL  | 47.99 | REIKNYFRNRDPLSHPK*  | CGTGAAATAAAGAACTACTTTAGAAGAAATGACCCCTGAGGCCACCCCTAAATGA    |
| P22-2  | PY00620 | H2-Kd | KYSNFSQOI  | 12.98 | AVKTKYSNFSQOIEGHD*  | GCGGTGAAAACCTAAGTATAGTAACCTTAGCCAGCAGATAGAGGGGCATGATTGA    |
| P22-3  | PY00620 | H2-Kd | SYNANIQIL  | 13.12 | SIDSSYNAIQILLRVG*   | AGCATAGACTCTAGCTATAACGCTAACTCCAGATCCTCTTTGAGAGTAGGCTGA     |
| P22-4  | PY00620 | H2-Kd | KYSDSKYNI  | 18.82 | NVRIKYSDSKYNIKNEL*  | AACGTGAGATAAAGTATAGTGATAGTAAGTATAACATAGGTAATGAGCTGTGA      |
| P22-5  | PY00620 | H2-Kd | QYFINLLYI  | 20.97 | VQVVQYFINLLYLHLM*   | GTCCAGGTAGTGCAGTACTTCATAAATAACCTGTACATCTCCTCTTCTATGTGA     |
| P22-6  | PY00624 | H2-Kd | TYLSISAL   | 15.16 | PTRTTYLTSISALWPT*   | CCAACTAGAACAACTACCTGAGCATAATAAGCGCCCTAGCAGCACTGTAGCTGA     |
| P22-7  | PY00624 | H2-Kd | KYLDNAWNTL | 25.14 | PEELKYLDNAWNTLUGMR* | CTCTGAAGAGCTGAAGTATGATAACGCGCTGGAACACCCCTGATAGCATGAGATGA   |
| P22-8  | PY00628 | H2-Kd | LYLTSSSNI  | 8.62  | VORALYLTSSSNILPL*   | GTACAGCGCGCACTGTACCTGACTAGTAGTAGTAACATCTGCCATTGCCCTGA      |
| P22-9  | PY00628 | H2-Kd | LYGQNLILI  | 45    | DARLLYLGQNLINLSV*   | GACGCACGCTTCTGTACGCCCAGAACATAACCTGATCTGTCTGCTGAGCTGA       |
| P22-10 | PY00638 | H2-Kd | KYISFLFL   | 24.54 | YSGPKYISFLFLIGHIT*  | TATAGCGGGCCCTAAGTACATAAGCTTCTGCTGTGTTCTAGGAATTTACACTTGA    |
| P23-1  | PY00643 | H2-Kd | SFIKSFQYI  | 19.18 | RRMQSFIKSFQYIVPLS*  | CGCCGAATGCAAAGCTTCTATAAAGAGCTTCCAGTAGCATAGTTCCCACTCTCGTGA  |
| P23-2  | PY00659 | H2-Kd | IYMDKLSL   | 8.74  | GGQAIYMDKLSLSAE*    | GGAGGTCAGGCAATCTACATGGATAAGCTAGTAGTACCTGTCCCGTAGCCCGTGA    |
| P23-3  | PY00659 | H2-Ld | YPHFVFEAF  | 23.48 | VFIDYPHFVFEAFDRV*   | GTATTTATAGACTACCCTCACGTTGCTGTAGAGGCTTCTGTAGACCGCGTGTGA     |
| P23-4  | PY00665 | H2-Kd | KYAKLDSI   | 4.87  | SQIVKYAKLDSITNHL*   | TCACAGATAGTGAAGTACGCTAAGAGCGCTAGATAGCATAACCTAACCATCTGA     |
| P23-5  | PY00665 | H2-Kd | KYVKYAKSL  | 21.6  | HLQLKYVKYAKSLRVL*   | CATTTGCAGCTGAAGTACGCTGAAGTACGCTAAGAGCGCTGAGAGTCTTAACTGA    |
| P23-6  | PY00665 | H2-Kd | IFLNLMLNI  | 30.07 | GFRAIFLNLMLTNIAQR*  | TTTCCCCGTGCTATTTCTCTGAACATGCTGACTAACCTGATCCGCCAGCGTGA      |
| P23-7  | PY00688 | H2-Kd | ROFNITHAI  | 19.34 | PTETROFNITHAIVSKK*  | CCAACTGAAACTAGACAGTTTAACATAACCCACGCCATAGTCTCTAAGAAGTGA     |
| P23-8  | PY00688 | H2-Ld | YPLINGMKL  | 32.13 | TYLVYPLINGMKLGIHP*  | ACATACTTAGTGTAACCTCTGATAAACCGCATGAAGCTAGGTATTCACCTCTGA     |
| P23-9  | PY00694 | H2-Kd | YVIVPKSQI  | 16.75 | EFFVYVIVPKSQIQILL*  | GAGTCTCTTTGTATACGTGATCCCTAAGAGCGCATAGCAGGTAAGCTTCCATCTGA   |
| P23-10 | PY00694 | H2-Kd | NYITIPFII  | 29.37 | ARYFNYYITIPFIVIVL*  | CTAGGTATTTTTAACTACTACATAACCATCCCTTTTCATAGTAAATAGTGTGTGA    |
| P24-1  | PY00694 | H2-Kd | KYIYIDNLI  | 31.85 | QDGVKYIYIDNLLKAE*   | CAGGATGCGCGTGAAGTACATCTACATAGATAACCTGCTGAAGAAAGCTGAATGA    |
| P24-2  | PY00694 | H2-Kd | ITYGRRFSI  | 42.03 | DVFIYITGRRSFIEKKQ*  | GATGTGTTCTACATCTACACCGGTAGAAGAAGCTTTCATAGAGAAGAAGCAGTGA    |
| P24-3  | PY00694 | H2-Kd | IYSKVDNLI  | 42.76 | LLRPIYSKVDNLIHEHS*  | CTCCTACGTCCCATCTATAGTAAGGTAGATAACCTGATCAATGGAACACTCGTGA    |
| P24-4  | PY00704 | H2-Kd | NYNNNNVNI  | 19.88 | LYVCNNNNNVNIPAKL*   | TTAGTGTGTCGTAACATAATAAACGTGAATAACATCCCACTGACTGAAGTATGA     |
| P24-5  | PY00704 | H2-Kd | RYEGILYTI  | 22.66 | RTVIRYEGILYTIKPSV*  | CGCACTGTAATAAGATATGAGGGCACTCTGTACACCATCCCTAACTCGGTGTGA     |
| P24-6  | PY00718 | H2-Kd | RYIYNRLIL  | 17.91 | PTNQRYIYNRLILDFGK*  | CCAACTAACCAGAGATACATCTATAATAGACTGATCCTAGACTTTGGTAAGTGA     |
| P24-7  | PY00718 | H2-Kd | NYMVLVFTI  | 21.82 | ESKINYMVLVFTIDAGA*  | GAAGATAAAATAAAGTACATGGTGCTAGTGTTCACCATAGATGCGCGAGCTTGA     |
| P24-8  | PY00718 | H2-Kd | AYIENVSPF  | 30.49 | FSRHAYIENVSPFGFQI*  | TTCTCCCGGCATGCGCTACATAGAGAAGCTGAGGCCCTTTCCGGTTGCGCGCGTGA   |
| P24-9  | PY00718 | H2-Kd | YSKRSSNL   | 32.29 | MYRHSYSKRSSNLTIPE*  | ATGTATAGGCATAGCTATAGTAAGAAGTAGTAACCTGACGATACCTGAGTGA       |
| P24-10 | PY00718 | H2-Kd | NYNNVTQNI  | 34.98 | RAIPNYNNVTQNIHKTL*  | CGAGCTATTCTCTAACTATAAATACGTGACCCAGAACATCCCATAAAGCATTTGTA   |
| P25-1  | PY00718 | H2-Ld | HPMIQFHAL  | 29.85 | SLNDHPMIQFHALFLV*   | TCCCTGAATGATACCCCTATGATCCAGTTCACAGCCCTGTCTGCTGATAGTTTGA    |
| P25-2  | PY00718 | H2-Ld | YPHYVFRIF  | 40.1  | NELCYPHYVFRIFTYMS*  | AATGAGCTGTGTTACCTCCACATCTACGTGAGCAATCTCTCACCTCAACTGATTGA   |
| P25-3  | PY00718 | H2-Ld | SPFIEKYNM  | 48.09 | TGSKSPFIEKYNMPDNP*  | ACTGGATCTAAAAGCCCTTTCATAGAGAAGTATAACATGCCTGATAATCCGTGA     |
| P25-4  | PY00738 | H2-Kd | SYFPSYIYM  | 19.63 | IQKNSYFPSYIYMAQWD*  | ATCCAAAAAATAGCTACTTCCCTAGCTACATCTACATGGCACAATGGGACTGA      |
| P25-5  | PY00738 | H2-Kd | SYIYMEHYM  | 19.88 | KLKSYYIYMEHYMVSLT*  | AAGCTGAGTAAGAGCTACATCTACATGGGAGCAGCTGATGGTGAGTCTAACCTGA    |
| P25-6  | PY00738 | H2-Kd | NYFKGFIII  | 22.05 | GLSQNYFKGFIIITLTH*  | GGTCTCTCCCAAGAACTACTTTAAGGGCTTCATAATAATCCTAACACATTTATGA    |
| P25-7  | PY00738 | H2-Ld | IPLSQYSLS  | 31.25 | FLPPISQYSLSLTETA*   | TTCTGCCACCCATCCCTCTGAGTAGCCAGTAGTACCTGACTGAGACAGCATGA      |
| P25-8  | PY00764 | H2-Kd | NYSNKFSFI  | 6.11  | LSLDNYSNKFSFIPDWL*  | CTGAGCTAGATAAAGTATAGTAAGAAGTATAGCTTATCCCTGACTGGCGTATGA     |
| P25-9  | PY00764 | H2-Kd | KYNSNLI NI | 6.44  | DVECKYNSNLI NIEVQF* | GACGTAGAATGTAAGTATAAGTAACTCCTGAACATAGAGGGTGCAAGGGTGA       |
| P25-10 | PY00764 | H2-Kd | KYKNINFNTI | 8.07  | LKASKYKNINFNTISPP*  | CTGAAGAGCTAGTAAGTATAAGAACATCTTTAAACACCATAATAAGCTCCCATGA    |
| P26-1  | PY00764 | H2-Kd | QYIGNVDHI  | 15.71 | VQOYQYIGNVDHITSTN*  | GTGCAGCAGTACCAGTACATAGGTAACGTAGACACACATAACCTCAACTAGTGA     |
| P26-2  | PY00764 | H2-Kd | HWICCKYSI  | 31.8  | KSRPHWICCKYSIKYPT*  | AAAAGCCGCGCTCACTGGATCTGCTGTAAGTATAGCATAAAATACCCACGTGA      |
| P26-3  | PY00764 | H2-Kd | SYCRIKHGI  | 31.98 | LVLWSYCRIKHGIPSVQ*  | CTAGTGCTTTGGAGCTACTGTAGAATAAAGCAGCCAGCATCCCTAGCGCTTCAGTGA  |
| P26-4  | PY00764 | H2-Kd | NYKLYKQI   | 34.1  | VPTVNYKLYKQIVESQ*   | GTCCCAACTGTGAAGTACTATAAGCTGAAGCTACCCAGATAGAGTAGCTCAGTGA    |
| P26-5  | PY00764 | H2-Ld | YPHFNDYQL  | 16.12 | DLLPYPHFNDYQLNEFR*  | GACTTGCTGCCATACCCCTCACTTTAATGACTACACCGCTGAATGAGGTTTCGCTGA  |
| P26-6  | PY00764 | H2-Ld | FPFNHLYNF  | 19.42 | AFVLFPFNHLYNQLWTS*  | GCCTTTGTTGTTATTTCCCTTTTAAACCACTGCTATAACCTTCTTATGACTCTTGA   |
| P26-7  | PY00764 | H2-Ld | MPMAGNNLL  | 33.36 | SAISMPMAGNNLLYDFK*  | TCAGCTATCTCCATGCCTATGGCCGGTAATAACCTGCTGTATGACTTTAAATGA     |
| P26-8  | PY00768 | H2-Kd | YYNILFSV   | 20.98 | TYRLYYNILFSVFRLY*   | ACTTATAGGCTGTACTACGTGAACATCCTGAGCTTTCGTGTTTATGAGCTATTGA    |
| P26-9  | PY00769 | H2-Kd | KYDNNNGNPI | 22.59 | TKVRKYDNNNGNPISITQ* | ACTAAAGTCGCTAAGTATGATAATAACGGTAAACCCCTATAAGCACAACCCAGTGA   |
| P26-10 | PY00769 | H2-Kd | KMFNLNTI   | 25.82 | MVEYKMFNLNTIUSICE*  | ATGCTAGAGTATAAGATGTTTAACTGAACACCATTAATAGACTGCCATGAATGA     |
| P27-1  | PY00769 | H2-Kd | NYNQSSSFL  | 26.89 | PSLANYNQSSSFLTFEP*  | CCTTCGTTAGCTAACTATAACCAAGAGTAGTAGCTTCTGACTTTTGAGCCTTGA     |
| P27-2  | PY00769 | H2-Kd | YIKIKEGI   | 38.8  | NRQIYIKIKEGITIDI*   | AATAGAATCCAGATCTACATAAAGATAAAGGAGGGCATAACGATAGACATCTGA     |
| P27-3  | PY00769 | H2-Kd | KYRISINII  | 44.78 | YHSAKYRISININILSV*  | TATCACTCTGCTAAGTATAGAATAAGCATAAATAAACATAACCTAGCGCTCGA      |
| P27-4  | PY00769 | H2-Kd | KYVFQEEGI  | 46.64 | NKECKYVFQEEGIFLDF*  | AATAAGGAGTGTAAGTACTACTCCAGGAGGAGGGCATCTTTCTGTTCCGATCTGA    |
| P27-5  | PY00775 | H2-Kd | TYMSSNFI   | 5.83  | ASLKTMYMSSNFIIEGV*  | GCATCCTCGAAGACCTACATAGTAGTAGTAACCTTCGCGATAGAAGGATAGACTGA   |
| P27-6  | PY00775 | H2-Kd | TYGFLLSVI  | 25.85 | GFKMTYTYGFLLSVITFK* | GGCTTTAAGATGACCTACGGCTTCTGCTGAGCGGTGATAACTAAGTTAAGTGA      |
| P27-7  | PY00775 | H2-Kd | LYLWFSFL   | 48.5  | QMVPYLYLWFSFLDCS*   | CAGATGGTCCCTCTGTACTACCTGTGGTTTGTAGCTTCTGATAGCTTCTCTTGA     |
| P27-8  | PY00775 | H2-Ld | YPRINSISL  | 30.92 | RQDSYPRINSISLSGOL*  | CGCCAGGATTCTTACCCTAGAATAAATAGCATAAAGCCTGAGCGGTCAACTGTGA    |
| P27-9  | PY00796 | H2-Kd | IYMVSKNNI  | 5.35  | SLRVYIYMVSKNNICAQP* | AGTTTGGGGTGATCTACATGGTGAGTAAGAATAACATCACTGCGCCAGCCATGA     |
| P27-10 | PY00796 | H2-Kd | YYNLNYPMI  | 6.92  | AGAIYYYNLNYPMIASL*  | GGCGGCGCATCTACTATAACCTGAACCTGACCTGCTATAGCTAGGCTAGGCTGA     |
| P28-1  | PY00796 | H2-Kd | SYNNKSYV   | 7.66  | RIILHSYNNKSYVFMKQ*  | AGGATTCTCCATAGCTACATAAATAAAGAGCTACGTGTTTATAGGGAAGTGA       |
| P28-2  | PY00796 | H2-Kd | FYNNHNSFI  | 19.44 | KRFMFYNNHNSIFIEQRP* | AAAAGGTTCTAGTCTTCTATAATAACCATAGATCTTCTATAATAGAGCAACCTGA    |
| P28-3  | PY00796 | H2-Kd | SYSKSNNEL  | 22.86 | YHLRSYSKSNNELVDDE*  | TATCACCTGAGGAGCTATAGTAAGAGTAAATAGAGCTAGTAGATGATGAATGA      |
| P28-4  | PY00796 | H2-Kd | RYIFLYYVL  | 30.68 | MNPLRYIFLYYVLLSLI*  | ATGAACCCCTCTGAGATACATCTTCCGTGTAACCTGCTGCTGCTGCTGCTGATTGA   |
| P28-5  | PY00796 | H2-Kd | IYMTLLECI  | 37.06 | IHYDIYMTLLECIENDD*  | ATTCACTATGACATCTACATGACCCCTGCTAGAGTGATCAATAATGATGAGGATTGA  |
| P28-6  | PY00801 | H2-Kd | YYNMGSVI   | 2.89  | TVFAYYYNMGSVILFAQ*  | ACAGTCTTCGCACTACTATAATAACATGCGTGAAGTATGCTGTTGCTCAGTGA      |
| P28-7  | PY00801 | H2-Kd | SYISNFNLI  | 6.55  | MEVESYISNFNILRRDQ*  | ATGGAGGTGAGAAAGCTACATAAGTAACCTTCATAAACCTGAGACGCTGACCACTGA  |
| P28-8  | PY00801 | H2-Kd | KYVVNFYLI  | 7.39  | LSYEKYVVNFYLIEAEA*  | CTTTCTATGAGAAGTACGTAGTGAACCTCTACCTGATAGAGGCTGAGCCCTGA      |
| P28-9  | PY00801 | H2-Kd | YYLAIAFFI  | 8.93  | GSLYYYLAIAFFIYEH*   | GATAGCCTGTATTACTACCTAGCCATAGCCTCTTCATCTTATATGAGCAATTGA     |
| P28-10 | PY00801 | H2-Kd | YYMHNKEMI  | 9.62  | IAATYYMHNKEMILVSGQ* | ATAGCAGCTACCTACTACATGCATAATAAGGAGATGCTAGTGAGCGGCAGACTGA    |
| P29-1  | PY00801 | H2-Kd | KYNNMGSGV  | 18.44 | PKGEKYYNNMGSVLLQK*  | CCTAAGGGTGAGAAGTACTATAATAACATGGGTGGGAGCGCTGCTCTGCTAAAAATGA |
| P29-2  | PY00801 | H2-Kd | VYFIVASF   | 19.53 | TAPSVYFIVASFHLRS*   | ACGGCCCTTAGCGTGACTTCTATAGTAGTACTGCTTCTGCACTGCGGTAGTGA      |
| P29-3  | PY00801 | H2-Kd | QYQIINTNI  | 25.48 | ILYKQIQTQIINTILDK*  | ATTTTGTATAAGTTCCAGATCCGAACACATAACTAACATACAGTAAAGTGA        |
| P29-4  | PY00801 | H2-Kd | SYTNKYFFL  | 33.16 | KFDDSYTNKYFFLYGEL*  | AAATTTGACTCTAGCTACACTAATAAGTACTTCTTCCCTAGGCTATGAGCTGTGA    |
| P29-5  | PY00801 | H2-Kd | KYILKYQI   | 36.06 | TVNGKYILKYQIQADE*   | ACAGTGAATGGTAAGTACTACATCTGCAAGTATAAGTAAACAGGCTGATGAATGA    |
| P29-6  | PY00801 | H2-Kd | LYINCYFLL  | 37.89 | QLKSLYINCYFLLDPYP*  | CAGCTGAAATCACTGTACATAAACTGCTACTTCTGCTAGACCCGCCCTATTGA      |
| P29-7  | PY00801 | H2-Ld | SPINANFLF  | 40.39 | CGHTSPINANFLFISEP*  | TGTGGGCATACAGCCCTATAAACGCTAAGCTTCTGTTCTGAATAGTGAGGCTTGA    |
| P29-8  | PY00802 | H2-Kd | SPINKLYSHL | 8.46  | IGLQSYINKLYSHLTKTK* | ATAGCCCTGCAGAGCTATAATAAGCTGATAGCTGCTGATCACTAAGCAATTGA      |
| P29-9  | PY00802 | H2-Kd | RYHHYNNFI  | 12.22 | ECGHRHYHHYNNFIAPEE* | GAATGCGGTGATAGATACCACCACCTATAACTTCTCTATAGCCCTGAGGAATGA     |
| P29-10 | PY00802 | H2-Kd | NYHKTGTPI  | 21.82 | NSTMNYHKTGTPIPKAF*  | AATAGTACCATGAACCTACCATAAGACCGCGCACCCCTATGCCATAGCACTTCTGA   |
| P30-1  | PY00802 | H2-Kd | LYNNLQQYI  | 29.48 | HSPLLYNNLQQYIDSSK*  | CACCTCCACCACTGTATAATAACCTGCAGCAGTACATAGATAGTAAAGTGA        |
| P30-2  | PY00818 | H2-Kd | KYNNNSDQI  | 10.44 | RLVPKYNNNSDQIESSE*  | CGGTTAGTACCTAAGTATAATAATAATAGTGACCCAGATAGAACTGAGGATGA      |
| P30-3  | PY00818 | H2-Kd | LYGPKTSEI  | 34.08 | VSTWLYGPKTSEIOGRI*  | GTCTCCACCTGGGTGACGGCCCTAAGACTAGTGAGATCCAGGGTAGGATCTGA      |
| P30-4  | PY00834 | H2-Kd | YSYSSGSEL  | 6.26  | DSHMSYSSSGYSELPEGE* | GACTCACACATGAGCTATAGTAGCGGCTATAGTAGCTAGAACCCGGTGAACTGA     |
| P30-5  | PY00834 | H2-Kd | NYDDNIHNI  | 6.82  | VLNLYNYDDNIHNIADCE* | CTAGTCCCACTGAACCTACTGTATAACCTCATAAGCATAGCTGATGAATGCTGA     |
| P30-6  | PY00834 | H2-Kd | KYLFITNII  | 11.83 | RIKLKYLFITNIIYSYAG* | CGGATAAAGCTGAAGTACCTGTTTATAACTAACATAATCTCTATGCGGAGTGA      |
| P30-7  | PY00834 | H2-Kd | NYFISIDTI  | 13.18 | SSTRNYFISIDTILAAF*  | AGTTCTACTAGGAACCTACTTCATAAGCATAGACACCATCTAGCCGCTATTGA      |
| P30-8  | PY00834 | H2-Kd | AYNNIGTNI  | 16.53 | PLILAYNNIGTNIIEQLK* | CCACTAACTAGCCTATAATAACATAGGCACATAACATAGCAGAAACCTGTGA       |
| P30-9  | PY00834 | H2-Kd | RYGDNNSTL  | 16.98 | TRLLRYGDNNSTLWLQ*   | ACACGCCCTCTGAGATACGGTGATATAATAAGCATAAGCTGCTGCTGGGACATGA    |

|        |         |       |             |       |                      |                                                             |
|--------|---------|-------|-------------|-------|----------------------|-------------------------------------------------------------|
| P30-10 | PY00834 | H2-Kd | FYLKTILLI   | 27.59 | MSLKFYLKILLIGSVP*    | ATGTCGTAAAGTTCTACCTGAAGACCCTCGTCTGATAGGTTCTGTGCCATGA        |
| P31-1  | PY00834 | H2-Kd | IYLVFIKI    | 34.22 | FKRDKYLVFIKISTML*    | TTTAAGAGAGATAAGTACATCCTAGTGTTCATAAAGATAGACATACTGATGA        |
| P31-2  | PY00834 | H2-Kd | IYTFISKI    | 41.66 | RATAIYTFISKIPDL*     | AGAGCAACAGCAACTACACCTTCATATAAGTAAGATCCCTGAGGCCCTCTGA        |
| P31-3  | PY00834 | H2-Kd | LYNNSRDNL   | 48.24 | CDJSLYNNSRDNLKFNA*   | TGTGACATCTCACTGTATATAATAAGTAGAGATAACCTGAAATTTAACGCTTGA      |
| P31-4  | PY00851 | H2-Kd | KWNKYTSFI   | 13.08 | LARGKWNKYTSFIPQLR*   | CTAGCCCGAGGTAAGTGAATAAGTACACTAGCTTCATCCCAACAAGTAGGTGA       |
| P31-5  | PY00851 | H2-Kd | SKNIQRNDTI  | 19.77 | FRSMFSQNIQRNDTITSP*  | TTTAGGTCCATGAGCTTCACTCCAGAATAAGTAGAGACACCAACTTCCACCCACATGA  |
| P31-6  | PY00851 | H2-Ld | YPPNMPISL   | 21.82 | EISYPPNMPISLNRMG*    | GAAATAAGCATCTACCCCTTTTAAACATGCCTATAAGCCTGGAATAGAATGGGGTGA   |
| P31-7  | PY00851 | H2-Ld | YPPCMRRIF   | 46.1  | YYEDPPCMRRIFITHVN*   | TACTATGAGGATTTCCCTCCTTGCATGAGAAGAATCTTCACTCATGTGAACCTGA     |
| P31-8  | PY00855 | H2-Kd | IYVVSINYI   | 13.03 | LQLPIYVVSINYIDAE*    | CTACAGTTGCCCATCTACGTAGTGAGCATAAACTACATAGATGCTGAGGCATGA      |
| P31-9  | PY00855 | H2-Kd | YYWADHFGI   | 13.36 | QGFNYWADHFGIRPIV*    | CAGGGTTTTAATTACTACTGGCTGACCACTTCGGCATAAAGACCCTAGATTTGA      |
| P31-10 | PY00855 | H2-Kd | YVYNSLYEL   | 18.92 | VFKQVYNSLYELLNRK*    | GTCTTTAAGCAGGTGTACGTGAATGAGCCTGTATGAGCTGTAAACCGTAAGTGA      |
| P32-1  | PY00855 | H2-Kd | AYINSFHYF   | 36.17 | EYSSAYINSFHYFOEIL*   | GAGTATAGTTCGCGCTACATAAATAGCTTCCACTACTTCCGAAGAAATAGCTGA      |
| P32-2  | PY00896 | H2-Kd | KYMNKINGL   | 7.42  | LDYAKYMNKINGLEAGC*   | TTAGACTACGCTAAGTACATGAACATAAAGAACGCGCTAGAGGCCGCGCTGTTGA     |
| P32-3  | PY00896 | H2-Kd | NIYFYSIINL  | 43.15 | YCDKNYFYSIINLNGT*    | TATTGTGATAAGAACTACTTCTATAGCATATAAACCTGCTGAACGGAACATGA       |
| P32-4  | PY00896 | H2-Kd | SYENKMSNI   | 46.6  | KTNCYSYENKMSNIERF*   | AAGACTAATTGTAGCTATGAGAATAAGATGAGTAACATAGAGCGGTTTGAAGTGA     |
| P32-5  | PY00915 | H2-Kd | GYLAILWKI   | 33.52 | EDQAGYLAILWKIVMIG*   | GAAAGTCAAGCAGGCTACCTAGCCATCCTGTGGAAGATAGTGATGATAGGCCTGA     |
| P32-6  | PY00916 | H2-Kd | SYIEVLEHL   | 5.41  | KEKDSYIEVLEHLSLAH*   | AAGAGAGAAGATAGCTACATAGAGGTGCTAGAGCACATGACCTAGCGCACTGA       |
| P32-7  | PY00916 | H2-Kd | VYTYMSFNI   | 20.97 | RHYSVYTYMSFNIFVRE*   | AGGTACCATAGCGGTGACACCTACATGAGCTTTAAACATCTTTGTGTCGGAATGA     |
| P32-8  | PY00916 | H2-Kd | LYNRLNIOLYM | 36.45 | QIANLYNRLNIOLIYM*    | CAAAATAGCTAATCTGTATAATAGAAACCTGATCCAGCTAGAGATGATATGATGA     |
| P32-9  | PY00916 | H2-Kd | KYVKYTKNL   | 37.13 | SIFPKYVKYTKNLQIQT*   | TCCATTTTCCCTAAGTACGTGAAGTACATAGAACCTGCAGATCCAGACTTGA        |
| P32-10 | PY00916 | H2-Kd | KQEAMRTYI   | 39.02 | GVGIKQEAMRTYIGPAT*   | GGAGTAGGGATAAAGCAGGAGGCCATGAAGACCTACATAGGACCTGCCACTTGA      |
| P33-1  | PY00928 | H2-Kd | YMYTNSEI    | 30.69 | TNPYIYMYTNSEILEEV*   | ACTAAACCCCTATTACATGTACACTAATAGTAGTGAGATCTTAGAGGAGGTTGA      |
| P33-2  | PY00959 | H2-Kd | YYLQNYMQL   | 8.42  | SAFSYYLQNYMQLGIV*    | AGCGCATTTTTCATACCTACCTGCAGAACATACATCGAGCTAGGGATAATGATGTGA   |
| P33-3  | PY00959 | H2-Kd | IYINFNNNI   | 9.76  | KALYIINFNNNIGRKIP*   | AAAGCCTGTACATCTACATAAACCCTTTAATAAATACATAGGCGGTAAAGCCTTGA    |
| P33-4  | PY00959 | H2-Kd | FYSDFTSYI   | 10.03 | DWMSFYSDFTSYIRIVEM*  | GACTGGATGAGCTTCTATAGTGACTTCACTAGCTACATAAAGGCTAGAGATGTGA     |
| P33-5  | PY00959 | H2-Kd | KYLKYEKFI   | 11.21 | GADVKYLYKYEKFIELSE*  | GGTGCTGATGTGAAGTACCTGAAGTATAAGGAGTTCATCTAGAACTCGTAAGTA      |
| P33-6  | PY00959 | H2-Kd | IYAEINLQYI  | 14.36 | TVSYIAEINLQYIAGAQ*   | ACGGTGAGTTTCATCTACGCTGAGAACCCTGCAGTACATAGAGCGGCACAGTGA      |
| P33-7  | PY00959 | H2-Kd | TYDNNNNPI   | 16.07 | PNTFTYDNNNNPICVLF*   | CCTAAACCTTTTACCTATAATGATAATAAATACCCTTCTGTGTGCTTCTTGA        |
| P33-8  | PY00959 | H2-Kd | LYFTLFNII   | 16.45 | WGEILYFTLFNIIELPG*   | TGGGGTGAAATTTCTGTACTTCAACCTGTTTAAACATAATAGAACCCTAGGGTGA     |
| P33-9  | PY00959 | H2-Kd | NIYNNNEII   | 19.99 | DLLSNYNNNEIISNLG*    | GATCTCCTGAGTAACATACATAAATAATAGATATAATCTCACTGAATCAGTGA       |
| P33-10 | PY00959 | H2-Kd | KYIKGDIDI   | 21.61 | IGCQKYIKGIDIDILMP*   | ATAGGATGCCAAAGTACATAAAGGGTGAGTACATAGACATCCTGATGCCAGCCTGA    |
| P34-1  | PY00959 | H2-Kd | SYHFCLLYML  | 25.75 | RKLSYHFCLLYMLQSD*    | AGAAAACTGAGTAGCTACCACCTTGCCTGTACATGCTGCCACTCTGCTGAATGA      |
| P34-2  | PY00959 | H2-Kd | NYITLSNII   | 26.07 | NRVYNYITLSNIIAHGE*   | AATAGAGTCTATAAECTACATAACCCCTGAGTAACTAATAGCCATGGTGAATGA      |
| P34-3  | PY00959 | H2-Kd | QYYLNCPLI   | 26.85 | TAREQYYLNCPLICVVA*   | ACCGCTAGGGAGCAGTACTACCTGAACCTGCCTGCCTATCTGTGTAGTAGCGTGA     |
| P34-4  | PY00959 | H2-Kd | KYLILKQYI   | 27.43 | NPALKYILKQYIFNER*    | AACCCCGCCCTGAAGTACCTGATCCTGAAGCAGTACATCTTTAATGAGCGGTGA      |
| P34-5  | PY00959 | H2-Kd | FYHCNHLFM   | 35.91 | KGGVFYHCNHLFMELPW    | AAGGGAGGAGTGTCTACCACTGTAAACCACTGTTCTAGGAGCTGCCGTGGTGA       |
| P34-6  | PY00959 | H2-Kd | SFIDNIQSL   | 39.08 | LASFIDNIQSLERLF*     | CTAGCTAGCTTTAGCTTCTATAGATAAACATCCAGAGCTAAGGAAGACTGTTTGA     |
| P34-7  | PY00959 | H2-Kd | KYSIAKNII   | 40.09 | ISNCKYSIAKNIIIPSR*   | ATAAGTAAGTGAAGTATAGCATAGCTAAGAACATAATAATCCCTAGTAGGTGA       |
| P34-8  | PY00959 | H2-Kd | TNNVNVFLI   | 40.86 | DREVITYNNVFLIPLP*    | GATCGTGAGGTGACCTATAATAAGCTAGTGTTCCTGCTAGGTCGTCTGCCCTGA      |
| P34-9  | PY00959 | H2-Kd | SYFYFLDLL   | 44.39 | EDGNSYFYFLDLLVPSK*   | GAAAGACGGTAATAGCTACTTCTACTTCTAGACCTGCATGCTCGCTAGTAAGTGA     |
| P34-10 | PY00959 | H2-Ld | YYPQSKYVM   | 15.97 | NAFLPYYPQSKYVMAWD    | AACGCTTTCCTCTACCCCTTACCAGAGTAAGTACGTGATGCACGCCCTGGGATGA     |
| P35-1  | PY00959 | H2-Ld | LPNMNRNRF   | 33.54 | TGGLNLPNMNRNRLFSIF*  | ACAGGGGGTAACCTGCCTAACATGAATAGAAATAAATCTTCTAAGTATCTCTGA      |
| P35-2  | PY00959 | H2-Ld | SPIASTNII   | 39.9  | HSVLSPIASTNIIHLTE*   | CATTCCGCTGCTGAGCCCTATAGCTAGACACTAAACATCCTGCTCCATCATGAGTGA   |
| P35-3  | PY00967 | H2-Kd | SYNSDRNSI   | 6.93  | SCQASYSNDRNSIRAL*    | AGCTGTCAGGCTAGCTATAAATAGTATAGAAATAGCATCCGCTGCCGCGTGTGA      |
| P35-4  | PY00967 | H2-Kd | KYFODNDYI   | 10.15 | ETLWKYFODNDYISNEL*   | GAAACTCTGTGGAAGTACTTCCAGGATAATGACTACATAAGTATAGAGCTGTGA      |
| P35-5  | PY00967 | H2-Kd | LYIDMEYKL   | 28.57 | FNSTLYIDMEYKLPQFC*   | TTTAATTCTACCCTGTACATAGACATGGAGTAAAGCTGCCCTCAGTCTTGTCTGA     |
| P35-6  | PY00967 | H2-Kd | LYMDKINYL   | 45.04 | KSVYLYMDKINYLRKHN*   | AAGTCGCTCTATCTGTACATGGATAAAGTAAACTACCTGAACCCGATTAAGTTGA     |
| P35-7  | PY00972 | H2-Kd | FYHTSKPLI   | 12.92 | EDSLFYHTSKPLIYIAN*   | GAGGATAGTCTATTCTACCACACTAGTAAGCCCTGATCTATATAGCTAATTGA       |
| P35-8  | PY00972 | H2-Kd | CYQKKNDTI   | 36.92 | ARHCYQKKNDTITLIT*    | GCTAGGCATTGCTGCTACCAGAGAAGGATTAACCCATAGCTAAGCAACCACTGA      |
| P35-9  | PY01008 | H2-Kd | KMIEVISPI   | 13.95 | SGTPKMIEVISPIILIII*  | TCAGGTACACCTAAGATGATAGAGGTGATAAGCCCTATCCTCCTGATTCAATTGA     |
| P35-10 | PY01008 | H2-Kd | AYRNNWNIS   | 17.38 | ASKLAYRNNWNISITLGP*  | GCTTCTAAGCTAGCCTATAGAAATAAECTGGAATAGCATAACTAGGACCATGA       |
| P36-1  | PY01008 | H2-Kd | LYNSDNNHI   | 40.31 | RGVALYNSDNNHINETD*   | AGAGGGGTAGCTCTGTATAATAGTGATAAACCACATAAATAGAACTGATTGA        |
| P36-2  | PY01027 | H2-Kd | KYIDYIKYI   | 9.12  | KVRMKYIDYIKYIAES*    | AAGGTACGCTAAGTACATAGACTACATAAAGTACATAAAGTACGTAGTCTGTA       |
| P36-3  | PY01027 | H2-Kd | KFLFNYSMI   | 43.25 | MLQAKFLFNYSMLYRPA*   | ATGCTGCAAGCTAAGTTCCTGTTTAACTATAGCATGCTGTATAGGCCGCGCTGA      |
| P36-4  | PY01029 | H2-Kd | GYIHTCACI   | 12.59 | QRLLGYIHTCAICQAE*    | CAGCGGCTCTTAGGCTACATCCACACCTGCGCTGCATCCAGGAAGCGTGTCTGA      |
| P36-5  | PY01034 | H2-Kd | LYINILSFI   | 5.85  | TRQLYINILSFIVLAV*    | ACCTTTTAGGCCAAGCTGACATAAACCCTACCTGAGCTTCTGATGCTTTAGCAGTGTGA |
| P36-6  | PY01034 | H2-Kd | KYFVYLLYI   | 13.28 | IIKGKYFVYLLYIQDHA*   | ATAATAAAGGGTAAGTACTTCTGTACCTGCTGTACATCCGAAGCAAGCCGCTGA      |
| P36-7  | PY01034 | H2-Kd | HYMKTELYL   | 14.12 | ITKSHYMKTELYLGPQ*    | ATAACTAAAAGCCCACTACATGAAGACTGAGCTGTACCTAGGCTCTTCCAGTGA      |
| P36-8  | PY01034 | H2-Kd | SYINKNNII   | 15.88 | DQVLSYINKNNILAAAY*   | GATCAGGTGTTAAGCTACATAAATAAGAAATAACATCTAGCAGCGCGCTACTGA      |
| P36-9  | PY01034 | H2-Kd | SFIFTNTKI   | 38.42 | TSLLSFIFTNTKIYFIA*   | ACTTCTTATTAAGCTTCACTCTTCACTAACATGAATCTACTTATAGCGTGA         |
| P36-10 | PY01034 | H2-Kd | TYLTLCFRI   | 45.21 | DLQSTYTLTLCFRIAGNL*  | GATCTGCAGTCCACCTACCTGTACCTGTGCTTTGAATAGCAAGCGTAACTCATGA     |
| P37-1  | PY01046 | H2-Kd | AYNTGFOSI   | 5.49  | TAKIAYNTGFOSIAPAO*   | ACCGCTAAAATAGCCTATAAACACCGGCTTCCAGAGCATAGCCGCGCAGTGA        |
| P37-2  | PY01046 | H2-Kd | SYNNKRVISI  | 17.99 | GFCVSYNNKRVISIKIEL*  | GGCTTCTGCGTGAGCTATAATAAAGAGAGTGAGCATAAAGATAGAAGCTTGA        |
| P37-3  | PY01046 | H2-Kd | IYNTVYDEL   | 30.15 | VVETIYNTVYDELVSLT*   | GTAGTAGAGACAATCTATAACACCGTGTATGATGAGCTAGTGTGAGTACCTGA       |
| P37-4  | PY01046 | H2-Kd | NIYSLIWKI   | 41.52 | YHELNIYSLIWKIDNFG*   | TATCATGAGCTGAACTACTATAGCCTTGTGGAAGATAGATAACTTGTGGCTGA       |
| P37-5  | PY01063 | H2-Kd | RYISDNNVI   | 6.55  | QNPRRYISDNNVIKHSF*   | CAGAAACCCGCTAGATACATAAGTGATAAAGCTGATAAAGTACACATTTCTGA       |
| P37-6  | PY01063 | H2-Kd | TYLTNQTHL   | 11.82 | PWAPTYLTNQTHLSLIP*   | CCTTGGGCTCCCACCTACCTGACTAACCCAGACCCACCTGATAGAAGCCCTGTGA     |
| P37-7  | PY01063 | H2-Kd | KYVKTNFYI   | 12.42 | LISTKYVKTNFYLRQAI*   | CTGATACCACTAAGTACGTGAAGACTAACTTCTACCTGAGCGAGGCTATTTGA       |
| P37-8  | PY01063 | H2-Kd | IYSKYGSNI   | 16.86 | SGRAIYSKYGSNITSL*    | TCGTGGTGCTATCTATAGTAAGTACGCTGATGAATAACATACATAGTGAAGTGA      |
| P37-9  | PY01063 | H2-Kd | KYSQNLNLI   | 23.64 | ILLVKYSQNLNLIARKV*   | ATTTTGCTAGTGAAGTATAGCCAGCTGAACCTAGCCATAAGAAGAGGGGTTTGA      |
| P37-10 | PY01063 | H2-Kd | QYFDNNIII   | 34.22 | VSQPQYFDNNIIIAESP*   | GTGAGCCAGCCTCAGTACTTTGATAAATACATAAATAGTCTGAGAGCCCATGA       |
| P38-1  | PY01063 | H2-Kd | PIYSTILSI   | 34.82 | SNHPTPIYSTILSIRMR*   | TCTAATCATACCTCTACATAAAGCACCATCCTGAGCATAGAAGAGTATGATGA       |
| P38-2  | PY01063 | H2-Kd | KQFSKRNEI   | 43.75 | SDFTKQFSKRNEIRHO*    | AGTGATTTTACTAAGCAGTTTAGTAAGAGAAATGAGATAAGGACACCAAGGAATGA    |
| P38-3  | PY01063 | H2-Kd | IYIVLCEKI   | 49.81 | QLGITIYIVLCEKIQLRE*  | CAGCTAGGCATAACCTACATAGTCTGTGTGAGAAAGTCCAGCTGCGTGAATGA       |
| P38-4  | PY01063 | H2-Kd | IYIVLCEKI   | 49.81 | SGLSIYIVLCEKIIKHS*   | AGCGGTCTGTCAATCTACATAGTCTGTGTGAGAAAGATAATAAACCAATTCTTGA     |
| P38-5  | PY01065 | H2-Kd | YYINEVNNI   | 7.11  | TKVIYYINEVNNIAETN*   | ACTAAAGTGATTTACTACATAAATGAGGTGAATAACATAGACTGAAACTAATGTA     |
| P38-6  | PY01065 | H2-Kd | KYISRSINL   | 12.46 | SFNPKYISRSINLRPDA*   | AGTTTTAATCCTAAGTACATAAGTGAAGCAATAAACCTGCGCCCTGACGCATGA      |
| P38-7  | PY01065 | H2-Kd | YYVLSKNGI   | 17.93 | SPSQYVYVLSKNGIWDR*   | TCCCTAGCCAGTACTAGTCTGCTGAGTGAAGAAGCCGATCTGGGTGATCGCTGA      |
| P38-8  | PY01065 | H2-Kd | FFISYINTI   | 19.3  | SLSAFFISYINTIQKYP*   | TCCCTCTCCGCACTTCTTACATAAGCTACATAAACACCATCCAAAATACCATGA      |
| P38-9  | PY01065 | H2-Kd | IYSYSCSIL   | 21.43 | NIHHIYSYSCSILRSKS*   | AATATACACCACATCTATAGCTATAGCTGATGATCCTGCGTAGTAAGTCTCTGA      |
| P38-10 | PY01065 | H2-Kd | KYYKKNNDYI  | 21.54 | GAGAKYYKKNNDYLEGEV*  | GGCGCAGGTGCTAAGTACTATAAGAAAGAAATGACTACCTAGAACAAGAGGTTGTGA   |
| P39-1  | PY01065 | H2-Kd | SFIKMSSIL   | 42.23 | SQVVSFIKMSSILGSPQ*   | TCTCAGGTAGTGAGCTTCTATAAAGTAGTAGTACATCCTAGGATCAACCTAATGA     |
| P39-2  | PY01065 | H2-Ld | YPLNNIELF   | 42.54 | LOAFYPLNNIELFNESG*   | CTCCAGGCTTTTACCCTCTGAATAACATAGAGCTGTTTAAATGAATCTGGATGA      |
| P39-3  | PY01071 | H2-Kd | YVNGVFGSI   | 4.02  | VDSNYVNGVFGSIRSD*    | GTAGATAGTAATTACTATAACCGCGTGTTCGGTAGCATCCGTAGTGACCACTGA      |
| P39-4  | PY01071 | H2-Kd | KYLTHEIEI   | 6.75  | LGRKKYILTHEIEILV*    | CTAGGCCGTAAAAAGTACATCCTGACTGAGCATAGATAGAAATAGTATGTTGA       |
| P39-5  | PY01071 | H2-Kd | FYTYHLTSI   | 7.57  | PPILFYTYHLTSIAWTP*   | CCCCAATCCTGTCTACACCTACCACCTGACTAGCATAGCTGCGGACTCCCTGA       |
| P39-6  | PY01071 | H2-Kd | NIYTPDTSI   | 20.26 | DSALNIYTPDTSILLRE*   | GATTCGCTCTGAAACTACACCCCTGACACTAGCATCTGCTGCGTGAGTGA          |
| P39-7  | PY01071 | H2-Kd | KYIRTLNFI   | 22.49 | SAEPKYIRTLNFIHFM*    | AGTGCTGAGCCTAAGTACATAAGAACCCTGAGTAACCTCCATTTTATGGATTGA      |
| P39-8  | PY01071 | H2-Kd | KYFPNAGSI   | 28.03 | DGPAKYFPNAGSIHFAT*   | GACGGGCGGCTAAGTACCCTTTTAAAGCTTAGCGGCATCCATTTGCAACCCCTGA     |
| P39-9  | PY01071 | H2-Kd | FYLNCSNDL   | 49.56 | TLFSFYLNCSNDLACFV*   | ACACTGTTTATGTTTCTACCTGAACGTGATGATGAATCACTAGACTGCTTTTATGA    |
| P39-10 | PY01089 | H2-Kd | IYYANSKRI   | 35.74 | IVVYIYYANSKRIGTL*    | ATAGTGATCGTAATCTACTACGCTAATAGTAAGAGATAAGAAACCTGCACATGA      |
| P40-1  | PY01089 | H2-Ld | IPFWSTRRL   | 42.16 | PQIHIPFWSTRRLMSAV*   | CCACAGATACACATCCTCTTCTGGAGTAGAGTACAGTACATGAGTGGCGGTGTA      |
| P40-2  | PY01098 | H2-Kd | YYINNLRNI   | 2.81  | PLRSYYINNLRNIRMFY*   | CCTCTGAGATCCTACTACATAAATAACCTGAATAGAAATAGTGTTGCTGTGAATGA    |
| P40-3  | PY01098 | H2-Kd | KYMENIENL   | 6.22  | VMALKYMENIENLDRPF*   | GTGATGGCATAAGTACATGGAGAACATAGAGAACTAGCACTGAGCTGCGTGAATGA    |
| P40-4  | PY01098 | H2-Kd | FYFYLEYENI  | 8.13  | ALPEFFYFYLEYENIQEDA* | GCGCTGCGCTGAGTCTCACTTCTACCTGTATGAGAACATCCAAGAGGACGCTTGA     |
| P40-5  | PY01098 | H2-Kd | KYFYEHEML   | 8.96  | ECYSKYFYEHEMLNFWH*   | GAGTGTCTCTATAAGTACTTCTACTATGAGCAGCATGCTGAATTTCCACTGGTGA     |
| P40-6  | PY01098 | H2-Kd | KYQDMVLLI   | 9.9   | VQMLKYQDMVLLIALWLS*  | GTGCGAGATGTTAAAGTACGTAGACATGCTGCTGATAATAGCCCTGTGGTCACTGA    |
| P40-7  | PY01098 | H2-Kd | SYKEFKCKI   | 12.65 | HLTFSYKEFKCKIAELV*   | CATCTAACCTTTTACTACATAAAGGAGTTCGTGAAGTAGCTGAGCTAGTCTGTA      |
| P40-8  | PY01098 | H2-Kd | SYQKDLFYI   | 12.22 | HLHSYQKDLFYIESVK*    | ATTCTGATTACAGCTACCAGAAGGACCTGTGATCTTACATAGACTCTGTGAAGTGA    |
| P40-9  | PY01098 | H2-Kd | IYINYLNLI   | 14.21 | SVIVIYINYLNILDEVV*   | AGTGAATAGTAATCTACATAAACCCTGAAACATCCTAGATGAGGTAGTGTGA        |
| P40-10 | PY01098 | H2-Kd | KYIELNLI    | 16.59 | AFKVYKYLELNLIIPSE*   | GCCTTTAAAGTGAAGTACATCTATGAGCTGAAACATCTGATCCCTCTGTAGTGA      |

|        |         |       |            |       |                      |                                                           |
|--------|---------|-------|------------|-------|----------------------|-----------------------------------------------------------|
| P41-1  | PY01098 | H2-Kd | NYNSGLNNI  | 16.85 | SDKKNYNSGLNNINILL*   | TCTGATAAGAAGAACTATAATAGCGGCCTGAATAACATAAATCTTACTGTGA      |
| P41-2  | PY01098 | H2-Kd | YLFLEFENSI | 17.53 | HSHPYLFLEFENSIMRKN*  | CATAGCCACGCCCTTCTACCTAGAGTTTGAAGAATAGCATAAGCGTAAGCAAGTGA  |
| P41-3  | PY01098 | H2-Kd | YYNCMFVYHM | 23.54 | KORHYNYNCMFVYHMOIFL* | AAGCAGCGGCATTACTATAAAGTGCATGTACGTGCACATGCAGATCTCTGTGTA    |
| P41-4  | PY01098 | H2-Kd | KYIEEKLKYL | 27.18 | ATQMKYIEEKLKYLVGQA*  | GCCACACAGATGAAGTACATAGAGGAGAAGCTGTACCTAGTAGGGCAGGCGCTGA   |
| P41-5  | PY01098 | H2-Kd | KYEMNNAF   | 37.5  | QLPPKYEMNNAFRAAS*    | CAACTGCCTCCTAAGTACTATGAGATGAATAACGCCCTTTAGAGCCGCTAGCTGA   |
| P41-6  | PY01098 | H2-Kd | LYSFLNDFI  | 41.5  | DLMALYSFLNDFISRFL*   | GACCTAATGGCTCTGTATAGCTTCTGGAAGTGAACCTCATGAAGTGTCTCTGTGA   |
| P41-7  | PY01098 | H2-Kd | KMFNSLYSF  | 46.44 | DPDKMFNSLYSFTASA*    | GATCCTGATAAAAAGATGTTTAAATAGCCTGTATAGCTTCACAGCTAGTGCATGA   |
| P41-8  | PY01098 | H2-Kd | KFITNLNK   | 49.33 | GRHQKFITNLNKLECPV*   | GGCGGCATCAGAAGTTCACTAACTAACCTGAATAAGCAAGTGTCTGTCTGTA      |
| P41-9  | PY01098 | H2-Ld | YPMNNYEQF  | 12.62 | LVPKYPMNNYEQFSSAK*   | CTAGTGCCTAAGTACCCTATGAATACTATGAGCAGTCTCTAGTGCTAAGTGA      |
| P41-10 | PY01108 | H2-Kd | KYFPLLHTL  | 2.58  | GELKKYFPLLHTLVVLG*   | GGTGAGCTGAAGAAGTACTTCCCTCTGCTGCACACCCCTAGAGTGTCTAGGCTGA   |
| P42-1  | PY01108 | H2-Kd | FYSKLNSSI  | 5.3   | SHWRFYSKLNSSIGCGN*   | TCTCACTGGCGATTCTATAGTAAGCTGAATAGTAGCATCTGTGGCTGTAATTGA    |
| P42-2  | PY01108 | H2-Kd | SYNFIKSQI  | 5.83  | VLETSYNFIKSQITSL*    | GTITTAGAACTAGCTATAACCTCTATAAAGGCCACAGATACTCTAGTCTGTA      |
| P42-3  | PY01108 | H2-Kd | SYLNIYNLI  | 6.95  | SQGSTYLNLIYNLIVAGS*  | TCCCAAGGCACTAGCTACCTGAACATCTATAACCTGATAGTAGCCGGTAGCTGA    |
| P42-4  | PY01108 | H2-Kd | WYNDNNYNI  | 8.8   | KSACWYNDNNYNIMIAM*   | AAGTCAGCTTGCTGGTATAAATGATAAATAACTATAACATAATGATAGCCATGTGA  |
| P42-5  | PY01108 | H2-Kd | FYSKIKETI  | 9.95  | IPLKFYSKIKETIRFIV*   | ATACCCCTGAAGTTCTATAGTAAGATAAAGGAGACCATAAGGTTCTATAGTGTGA   |
| P42-6  | PY01108 | H2-Kd | NIYKMFVL   | 12.82 | RLMINYKMFVLPCDV*     | AGATTGATGATAAACTACATAAAGATGTTTGAAGTGCTGCGCTGACTGCGTGTGA   |
| P42-7  | PY01108 | H2-Kd | TYCVNFTNI  | 13.73 | PSDLTYCVNFTNIELKFL*  | CCTCTGACCTGACCTACTGCGTGAACTCTCACTAACTAGAACTGAATAAGTGA     |
| P42-8  | PY01108 | H2-Kd | YYIYNIDKL  | 15.06 | QLIVYYIYNIDKLFWDG*   | CAGCTGATAGTCTACTACATCTATAACATAGATAAGAGTGTCTGGGATACCTGA    |
| P42-9  | PY01108 | H2-Kd | VYHNHYVFEI | 18.45 | VYQEVYHNHYVFEIIPW*   | GTGTACCAGGAAGTGTACCATAACCTAGCTGTTTGAGATAATCCTGTGGGGCTGA   |
| P42-10 | PY01108 | H2-Kd | SYSNSEVSL  | 18.64 | RKLRSYSNSEVSLFSFH*   | AGGAACTGAGGAGCTATAGTAATAGTAGGTTGACGCTGTCTTTTCCCACTGA      |
| P43-1  | PY01108 | H2-Kd | KFISRIEYI  | 22.62 | QESPKFISRIEYIIFG*    | CAGGAGTCCCTCAAGTTCACTAAGTAGAATAGAGTACATAATAATTTTGGATGA    |
| P43-2  | PY01108 | H2-Kd | FYFLIINI   | 25.8  | MTSGFYFLIINIWLGD*    | ATGACCTCTGGATTCTACTTCTGCTGATAAATAAAGTCTGAGGATAGTGTGA      |
| P43-3  | PY01108 | H2-Kd | M'CYDLQNI  | 38.01 | LRSGMYCYDLQNIELR*    | CTGCGTTCGGGAAGTACTGTGACATCTGCGAGAACATAGAGCTGAGAGCCTGA     |
| P43-4  | PY01108 | H2-Kd | FYFKYTRCI  | 40.51 | ELAPFYFKYTRCIELG*    | GAGCTAGCTCCTTTCTACTTTTAACTACACTAGCTACCTAAGGAGCTAGGTTGA    |
| P43-5  | PY01108 | H2-Ld | LPYTQLYIF  | 49.41 | YPTVLPYTQLYIFAKAH*   | TATCCAACTGCTCCTGCCTTACACCCAGCTGTACATCTTCTGCTAAAGCCCAATTGA |
| P43-6  | PY01122 | H2-Kd | KYHLNATNI  | 6.64  | LVRMYKYHLNATNITVGY*  | TTAGTGAGAAGTGTACTACCTGAATAAGCGCCTAACCACTAGGCTGAGTACTGA    |
| P43-7  | PY01122 | H2-Kd | VYVYNNEEI  | 34.15 | MRDYVYVYNNEELHSP*    | ATGCGTGATTACGTGTACTACGTGAATAAGTAGGAGATCCTCCACTCACCCCTGA   |
| P43-8  | PY01122 | H2-Kd | KYHYLLVHL  | 26.55 | LETEKYHYLLVHLVPWL*   | TTAGAACTGAGAAGTACCACCTACCTGCTGTACCACTGCTGACCTGCGTATGA     |
| P43-9  | PY01123 | H2-Kd | QYVKAGSLI  | 29.41 | NEEFQYVKAGSLIGYSL*   | AATGAGGAGTTCAGTACGTGAAGGCCGGTAGGCTGATAGGATATAGCCTGTGA     |
| P43-10 | PY01123 | H2-Ld | YPHLNLNEI  | 38.06 | TECLYPHLNLNEIKVNP*   | ACTGAATGTTTATACCCCTCACCTGAACCTGAATGAGATAAAAGTGAATCCTTGA   |
| P44-1  | PY01200 | H2-Kd | YFPEKCKTI  | 16.44 | VPEGSYFPEKCKTIIVDR*  | GTCCCTGAAGCTAGCTACTTTGAGAAGTGTGAAGCACTGAATAGTAGAGTTGA     |
| P44-2  | PY01200 | H2-Kd | NIYDIVYNI  | 22.5  | RPPANYNIYDIVYNIKVS*  | CGGCCACACAGTACACTACATAGACGTGTACATAAACATAATAAAGGTTGAGCTGA  |
| P44-3  | PY01200 | H2-Kd | ICYNTISNL  | 26.48 | LSGSIYNTISNLRGLT*    | TTGAGCGGCTTACTACTAGTAAACACCATAAGCTAACCTAGGCGCGGTGACCTGA   |
| P44-4  | PY01205 | H2-Kd | KMIFSAYKI  | 30.71 | KKRSKMIFSAYKIPADV*   | AAGAAGCGGCTAAGATGATCTTTAGCGCCTATAAGATCCCGCGTGACGTGTGA     |
| P44-5  | PY01205 | H2-Kd | ILYHYFFTL  | 35.57 | RSSGIYLYHYFFTLGMEM*  | CGTAGTAGCGGCATCTACCTGCACCTACTTCTTCCACCTAGGTATGGAAATGTGA   |
| P44-6  | PY01206 | H2-Kd | SFFRTFSQI  | 7.84  | IAIQSFFRTFSQILVTS*   | ATAGCTATCCAGAGCTTCTTTAGAACCCTTAGCCAGATCTCTAGTACCTGTGA     |
| P44-7  | PY01220 | H2-Kd | VYIKRSGSI  | 15.5  | HRGFYVYIKRSGSILLPS*  | CATAGAGGTTTCTGTGTACATAAAGAGAGGTAGCGGCATCTTATTACCTCCTGA    |
| P44-8  | PY01228 | H2-Kd | SYIESIPEI  | 3.35  | LTQHSYIESIPEIFVGA*   | CTAACCCAGCATAGCTACATAGAGAGCATCCCTGAGATCTTCTGATAGGAGCATGA  |
| P44-9  | PY01228 | H2-Kd | KYNNLNAYI  | 6.93  | YVTPKYNNLNAYIKKSE*   | TATGTAACACCTAAGTATAAATAACCTGAACGCCCTACATAAAGAAAGTAGTAATGA |
| P44-10 | PY01228 | H2-Kd | SYVDINNINI | 12.97 | DEERSYVDINNINISKYL*  | GATGAAGAAAGAAAGCTACGTAGATGACATAAATAACATCTCTAAATATCTCTGA   |
| P45-1  | PY01228 | H2-Kd | YYRAVILQI  | 24.52 | DAYDYVYRAVILQIETCD*  | GATGCCTATGACTACTATAGAGCCGTGATCCTGCGAGATAGAAACATGTGACTGA   |
| P45-2  | PY01231 | H2-Kd | KYLNTSEEI  | 9.66  | TMPRKYLNTSEENIADCK*  | ACCATGCCACGTAAAGTACCTGACTAATAGTGAGAGATGAAGCGGTGATAAGTGA   |
| P45-3  | PY01231 | H2-Kd | KYFCGPNVAV | 15.19 | LCYAKYFCGPNVAVLASE*  | CTGTGCTACGCTAAGTACTTCTGCGGCCCTAACGCCGTGTAGCCTGTGAGTGA     |
| P45-4  | PY01231 | H2-Kd | LYLPSTLVI  | 16.82 | TGAVLYLPSTLVMVGL*    | ACGGCGCCGTGCTGTACCTGCCAGCCTAGCAGTGTAGTAAATGGGTGTTTGTGA    |
| P45-5  | PY01231 | H2-Kd | GYISCWVHL  | 19.61 | GLPSGYISCWVHLPGDD*   | GGCCTGCCTTCTGGCTACATAAGCTGTCTGGTGCACCTGCCAGGTGATGACTGA    |
| P45-6  | PY01234 | H2-Kd | YVNDKYSYI  | 5.83  | ISAIYVNDKYSYILVME*   | ATAAGCGCATATACATAAGTATAAGTATAGTACATCTCTAGTAAATGGAGTGA     |
| P45-7  | PY01234 | H2-Kd | SYIKELISI  | 9.01  | PSEASYIKELISIRQSW*   | CCATCTGAGGCTAGCTACATAAAGGAGCTGTAGTAAGCATAGGACGCTGCCGTGA   |
| P45-8  | PY01234 | H2-Kd | SYMYKETL   | 9.21  | LTSTSYMYKETLGRFR*    | TTAACCTCAACTAGCTACTACATGTATAAGGAGACCTCTAGGTAGACGGTCTCTGA  |
| P45-9  | PY01234 | H2-Kd | KYYODTNLL  | 10    | MAQWYKYYODTNLLARN*   | ATGGCTCAATGGAAGTACTACCAGGACACTAACCTGCTAGCTAGAAACCGTGTGA   |
| P45-10 | PY01234 | H2-Kd | SWMCMIFPI  | 10.34 | KSPVSWMCMIFPISPED*   | AAGTCTCCGGTGAGCTGGATGTGCATGATCTTCCCTATAAGTCTCTGAAGACTGA   |
| P46-1  | PY01234 | H2-Kd | YYIKSLRLL  | 15.56 | LLQEYIKSLRLLFDRP*    | CTGCTTCAGGAATACTACATAAAGAGCCTGAGACTGCTGTTTGTACCGACCTGTA   |
| P46-2  | PY01234 | H2-Kd | SYFDNINOI  | 17.04 | HTAWSYFDNINOIDNEE*   | CACACCGCTTGGAGCTTCTTTGATAACATAAACCAGATAGATAAGGAGGTGA      |
| P46-3  | PY01234 | H2-Kd | KFFSQNLHL  | 17.93 | RKGGKYASQNLHLNGTA*   | AGAAAAGCGCGTAAGTACGCTAGCCAGCTGCATAAGCTGAACCGCATGCATGA     |
| P46-4  | PY01234 | H2-Kd | FYVNAFLNL  | 21.76 | ARATFYVNAFLNLMPGA*   | GCTAGAGCTACTTCTACGTGAACGCCCTTCTGTAACCTGATGCCAGGGGCCCTGA   |
| P46-5  | PY01234 | H2-Kd | YFFSPSSYI  | 23.77 | IVSQYFFSPSSYITVLQ*   | ATAGTTTACAGACTCTTCTTAGCCCTAGTAGCTACATAACGCTGCTCAACTGA     |
| P46-6  | PY01234 | H2-Kd | YYMYKETLL  | 24.85 | GLSWYYMYKETLLTSGO*   | GGGCTGAGTTGGTACTACATGTATAAAGGAGCCCTGCTGAGCTACCGTAGAGTGA   |
| P46-7  | PY01234 | H2-Kd | SYLKNNTL   | 26.66 | PNDESYLKNNTLFRQR*    | CCTAATGATGAGAGCTACATCCTGAAGATAACACCCCTGTTCAGCGTAAGTGA     |
| P46-8  | PY01234 | H2-Kd | NYFKNCNL   | 35.05 | DQQGNYFKNCNLTFSK*    | GATCAGCAAGGTAACCTACTTTAAGAACTGCATAAACCTGACGTTTCTAAGTGA    |
| P46-9  | PY01234 | H2-Kd | HYTNTFINL  | 37.36 | LHINHYYTNTFINLHTE*   | CTGCACATAAACCACTACACTAACACCTTCTATAAACCTGCATACCTGAGGATTGA  |
| P46-10 | PY01234 | H2-Kd | IFQONQYSNI | 37.85 | RIFHIFQONQYSNITESL*  | CGGATCTTTCTATATCTTCCAGCAGAACTATAGTAACTGAATCTGCTGTGTA      |
| P47-1  | PY01234 | H2-Kd | KYNIPEJNI  | 41.5  | FLPKYNIPEJNISMAR*    | TTTCTGAAGCCTAAGTATAACATCCCTGAGAGTAACTATCCATGGCAGCGGTGA    |
| P47-2  | PY01234 | H2-Kd | KYIENKQI   | 45.03 | RDEMKYIENKQIIVSHP*   | CGTGATGAGTGAAGTACATAGAGGAGAATAAGCAGATAGTGTCCATCCCTGTA     |
| P47-3  | PY01234 | H2-Kd | QYIKRGTL   | 49.67 | DSVGQYIKRGTLNNTKA*   | GACTCTGTAGGCCAGTACATAAAGAGAGGCCACCTGCTGAACACTAAAGCTTGA    |
| P47-4  | PY01234 | H2-Ld | IPLTMPNMF  | 43.36 | ITIIPLTMPNMFLESD*    | ATAATAACCATATCCCTCTGACCATGCTCAACATGCTTCTGATGAGAGTGAATGA   |
| P47-5  | PY01234 | H2-Ld | SPPEKLYTM  | 46.92 | YNOQSPPEKLYTMVSIT*   | TATAACCAAGAGAGCCCTTTTGAAGAAGCTGTAGACACCATGGTGAGCATAGCTGA  |
| P47-6  | PY01242 | H2-Kd | NYIRNHNNI  | 4.94  | SAKENYIRNHNNIEIKFI*  | AGCGCTAAGGAAACTACATAAAGAAACCAATAAATACATAGAGAAGATATTCTGA   |
| P47-7  | PY01242 | H2-Kd | FYFIRNHKI  | 9.56  | GLGFFYFIRNHKIKPRG*   | GGCTAGGTTTCTTCTACTCTTCTATAAACCTAGATATAAACCTCTCGTGAGTGA    |
| P47-8  | PY01242 | H2-Kd | SYICENSSV  | 19.52 | VSQWYICENSSVSNDL*    | GTATCAGGCTGGAGCTACATCTGTGAGAATAGTAGCGTGTCTAATGACTTGTGA    |
| P47-9  | PY01242 | H2-Kd | WYQMDSDVI  | 21.26 | WLDWFYQMDSDSVIRVAA*  | TGGTTTAGACTTCTGGTAGAGATGGATGATAGCGTGTATCCCGGTAGCCGCTGTGA  |
| P47-10 | PY01242 | H2-Kd | KYKNKITVK  | 25.06 | LSGPKYKNKITVKVLLV*   | CTCTCCGGCCCTAAGTATAATAAAGACATAACTAAGTGCTTCTAGTGAAGTGA     |
| P48-1  | PY01242 | H2-Kd | KYFLWKFI   | 25.06 | PAMDKYFLWKFIYSLL*    | CCGGCCATGGATAAGTACTACTTCTGGAAGTCTCATCTATAGTCTCTGTGTA      |
| P48-2  | PY01242 | H2-Kd | KYISPDNII  | 25.18 | SPQTKYISPDNIIOLHLG*  | TCCCCCACCACTAAGTACATAAGGCCCTGATAACATCTCTGTGCTTATAGGCTGA   |
| P48-3  | PY01242 | H2-Kd | GYSNGYFEL  | 27.49 | LFSEGYSNGYFELASYK*   | TTGTTTAGTGAAGGCTATAGTAACGGCTACTTTGAGCTAGGCTCCTATAGTGA     |
| P48-4  | PY01242 | H2-Kd | PYIRSNTSL  | 45.27 | VDKIPYIRSNTSLGEKN*   | GTAGATAAAATCCCTTACATAAAGAACTAACACTAGCTAGCTAGGAGAAACCTGA   |
| P48-5  | PY01244 | H2-Kd | KYWRNHVSI  | 3.21  | LEWQKYWRNHVSIWASH*   | CTAGAATGGCAGAGTACTGGAGAAACCACTGAGCATCTGGGCTAGTCATTGA      |
| P48-6  | PY01246 | H2-Kd | NYIKIDTPI  | 14.6  | PGFTNYIKIDTPIVAYE*   | CTGGGTTTACTAACTACATAAAGATAGACACCCCTATAGTAGCTGAGTATTGA     |
| P48-7  | PY01264 | H2-Kd | KYISNLNEL  | 3.7   | RFRFKYISNLNELVGD*    | CGTAGGTTTCTGAAGTACATAAAGTAACTGAATGAGCTAGTAGAGTGATCTATGA   |
| P48-8  | PY01264 | H2-Kd | KYQIDKSAI  | 10.74 | IFLSKYQIDKSAIDODL*   | ATATTCTCTAAGTACCAGATAGATAAAGAGCCCATAGACACATAGACAGCTGTGA   |
| P48-9  | PY01264 | H2-Kd | FOFKIYSYI  | 17.27 | CIERFOFKIYSYIVEND*   | TGCATAGAACCCTCCAGTTTAAAGATAATAAGCTACATAGTAGAGAATGATTGA    |
| P48-10 | PY01264 | H2-Kd | YRIGPNTDI  | 20.06 | EQRGRYRIGPNTDIRPLQ*  | GAGCAACGGGTAGATACATAGGCCCTAACACTGACATCCGCTCCACTCCAGTGA    |
| P49-1  | PY01264 | H2-Kd | ILYGLVENI  | 22.75 | SVSRIYLYGLVENIAVTC*  | AGTGTGAGTAGGATCTACCTAGGCCGTGTAGAGAACATAGTACAGTCAACTGTCTGA |
| P49-2  | PY01264 | H2-Kd | YYGISLNKI  | 38.89 | YDPKYYYGISLNKIFVNG*  | TATGACCCCTAAATACTACGGCATAGCCCTGAATAAGATCTCTGTAACGCGTGA    |
| P49-3  | PY01264 | H2-Kd | KYEFKHCTI  | 42.14 | IERSEKYEFKHCTIDIQA*  | GAACTTCTGAAAAGTATGAGTTTAAAGCACTGCACCATAGACATTAACGCGTGA    |
| P49-4  | PY01292 | H2-Kd | FYYSVEPKI  | 12.77 | NSSHFFYYYSVEPKIKGG*  | AATTCTCCCACTTCTACTATAGCGTAGAGCTAAGATAAAGGAGGATGAAGTGA     |
| P49-5  | PY01292 | H2-Kd | KYLYVVEKI  | 13.65 | LLAKLYLYVVEKIKKG*    | CTTCTCTAGCTAAGTACCTGTACGTATAGTGAAGAAGTCTTTAAAAGAGATGA     |
| P49-6  | PY01292 | H2-Kd | SYHDOKTNI  | 48.43 | GPFFHSYHDOKTNIHTFF*  | GGGCGGTTCCATAGCTACCATGATAAAGAACATAACATGCCACACCTTTTATGA    |
| P49-7  | PY01292 | H2-Kd | NIYSITYEI  | 49.73 | FLHNNYSITYEISFAE*    | TTCTGCTAATAAATACTAGCATAAGCTACCTAGCTAGACTTCTCGTGAATTTGA    |
| P49-8  | PY01292 | H2-Kd | SMHSNNTNI  | 49.73 | NSPPSMHSNNTNIEQR*    | AATAGCCCCCTAGCATGCATAGTAATAACACTAACATAATAGAGCAGCGCTGA     |
| P49-9  | PY01306 | H2-Kd | YYVINFINI  | 5.49  | KSQLYYVINFINIAITK*   | AAGAGTCAGTTACTATAACGTTGATAAATAACTCTATAGCCATAAATAAGTGA     |
| P49-10 | PY01306 | H2-Kd | FYFYKEQKI  | 14.89 | GVVAKFYFYKEQIRLSS*   | GGAGTAGTAGTAAGTACTTCTATGAGAAGGAGCAGATGCCGCTCTCTAGTTGA     |
| P50-1  | PY01306 | H2-Kd | YYIREIKI   | 25.28 | QYKDYYIREIKIIGILM*   | CAGTATAAAGATTACTACATAAAGAGATAGAGAAGATAGGCATTTCTGATGTGA    |
| P50-2  | PY01306 | H2-Kd | VYTPSPVHI  | 38.16 | SSLLVYTPSPVHIPIKRT*  | AGTTCTCTCCTAGTGATACACTAGCCCTGTACACCATAGACCATTAAGTGA       |
| P50-3  | PY01321 | H2-Kd | RYVECYANI  | 9.11  | LEIGRYVECYANISLGI*   | CTAGAGATAGGTAGATACGTAGAGTGCTACGCTAACATAAGCCTAGGAATCTGA    |
| P50-4  | PY01321 | H2-Kd | LYSKNVYTI  | 10.87 | HCGALYSKNVYTTIAVAL*  | CACCTGCGGGGCCCTGTATAGTAAGAAGTACGCTGACCATAGTACTGCTACCTGA   |
| P50-5  | PY01321 | H2-Kd | KYSGVFMGL  | 27.9  | VEPSKYSGVFMGLHARL*   | GTAGAGCCTTCTAAGTATAGCGGGCGTGTCTAGGGCCCTGACACGCCCGGCTTGA   |
| P50-6  | PY01321 | H2-Kd | KQVRSVLWSL | 40.26 | QLELKQVRSVLWSLNTFR*  | CAACTGAAATTGAAGCAGGTGAGAAGCCTGTGGAGCCTGAACACCTTCCGCTGA    |
| P50-7  | PY01329 | H2-Kd | GYFNSLNSI  | 2.71  | SRPRGYFNSLNSIPVSG*   | TCTCGACCTAGGGGCTACTTTAATAGCCTGAATAGCATGCTGCTTCTCCGGCTGA   |
| P50-8  | PY01329 | H2-Kd | AYYTDNSSI  | 5.11  | CILLAYYTDNSSIIHR*    | TGTATTCTGCTAGCCTACTACACTGATAAATAGTAGGATAATCCACCTCCGTTGA   |
| P50-9  | PY01329 | H2-Kd | KYSTNSSEI  | 5.48  | VYPGKYSTNSSEITVSQ*   | GTCTATCCTGGTAAGTATAGCACTAATAGTAGTAGGATAGCATGTATACAGTGA    |
| P50-10 | PY01329 | H2-Kd | YYISNGANI  | 6.22  | HVDTYISNGANILOKQ*    | CATGTAGACACATACTACATAAGTAACGGCGCTAACATCCTGCGAAGATGCTGA    |
| P51-1  | PY01329 | H2-Kd | LYTDNSSII  | 6.43  | SGDLYTDNSSIIHDFE*    | TCCGGTAGCCTGACTACACTGATAAATAGTAGACATAATCCATGATAAGTCTGA    |

|        |         |       |                |       |                     |                                                           |
|--------|---------|-------|----------------|-------|---------------------|-----------------------------------------------------------|
| P51-2  | PY01329 | H2-Kd | KYYPIINGI      | 6.59  | FQKVYKYYPIINGIVSNQ* | TTTCAGAAAGTGAAGTACTACCCCTATAATAAACGGCATAGTCTCTAATCAGTGA   |
| P51-3  | PY01329 | H2-Kd | KYDCGRRTI      | 6.99  | HLGMKYDCGRRTITGDYA* | CATCTAGGGTAGAGTACTGCTGCGGTAGAACCCACCATAGCTAGCCGTGA        |
| P51-4  | PY01329 | H2-Kd | FYIHCIGPI      | 9.92  | CESQFYIHCIGPIPKLK*  | TGTGAAAGTCAGTTCTACATCCACATCTGCGGCCCTACCTTAAGCTGAAGTGA     |
| P51-5  | PY01329 | H2-Kd | KYFLFOFTI      | 9.97  | ESSIKYFLFOFTILSRR*  | GAGAGTAGCATAAAGTACTTCTGTTCCAGTTTACCATCCTGAGTCGGCGCGTGA    |
| P51-6  | PY01329 | H2-Kd | YYNNKNSNI      | 10.15 | TGAFYYNNKNSNILVYP*  | ACCGGAGCTTTTTACTATAATAAAGAAATAGTAACATCCTAGTGTACCCATGA     |
| P51-7  | PY01329 | H2-Kd | YYNFNKKNI      | 12.04 | LIEGYNYNFNKNIFYFTS* | CTAATAGAGGGCTACTACTACTTTTAATAAGAAAGAACATCTCTTACTCTCTGA    |
| P51-8  | PY01329 | H2-Kd | AYICCCFFVI     | 13.69 | ELSDAYICCCFFVHDIW*  | GAACCTCTGACGCGCTACATCTGCTGCTTCTTCGTGATCCATGATATTTGGTGA    |
| P51-9  | PY01329 | H2-Kd | IYANLYANI      | 17.34 | DISKIYANLYANIILP*   | GACATTTCTAAAACTACGCTAACCTGACGCTAACCTAACCTTCTACCTCTGATGA   |
| P51-10 | PY01329 | H2-Kd | TYHINYFNI      | 17.88 | TDDRITYHINYFNIPSS*  | ACTGATGATAGAACCTACCACATAAACTACTTTAACTACCCCTCATCTACCTGA    |
| P52-1  | PY01329 | H2-Kd | IYISRNQI       | 18.22 | MDANIYISRNQIQFGPS*  | ATGGACGCTAACATCTACATAAGTAGAAACATCCAGATCTTCGAGGCTAGTTGA    |
| P52-2  | PY01329 | H2-Kd | YQNPIYHSL      | 19.13 | NLWRYQNPIYHSLFQSV*  | AATCTATGGCGTTACCAGAACCTTCTACCATAGCCTGTTTCAGAGCGTTTGA      |
| P52-3  | PY01329 | H2-Kd | FYTDCEYSI      | 19.48 | ARAEFYTDCESYIDLVD*  | GCTCGCGCTGAGTTCTACACTGATGAGTGTAGCTACAGTACACCTAGTGAAGTGA   |
| P52-4  | PY01329 | H2-Kd | NYFNITFII      | 23.02 | AVGLNYFNITFIICPVG*  | GCTGTAGGACTGAACACTTTTAACATAACCTTCATAATCTGCCTGTAGGCTGA     |
| P52-5  | PY01329 | H2-Kd | SYLYFLVKI      | 30.35 | NESSSYLYFLVKIPNG*   | AATGAGAGTCTAGCTACCTGTACTTCTTAGTGAAGATAGGCGCTAACGGATGA     |
| P52-6  | PY01329 | H2-Kd | FYSNRKESI      | 31.92 | QKTCFYSNRKESIGEPA*  | CAAAAAACCTGTTTCTATAGTAATAGAAAGGAGAGCATAGGTGAGCGCCGCTGA    |
| P52-7  | PY01329 | H2-Kd | TYNNSIDGI      | 43.03 | AFPDTYNNSIDGISEWE*  | GCTTTTCTGATACCTATAATAATAGCATAGACGGCATGAAGTAAGTGGGAGTGA    |
| P52-8  | PY01329 | H2-Kd | FYIYFFNL       | 45.73 | RNMSFYIYFFNLPCEL*   | AGGAACATGAGTTTCTACTACATCTACTTCTTTAACTGCGCTGTGAACCTCTGA    |
| P52-9  | PY01329 | H2-Kd | MOINKFTLI      | 48.94 | KEQMMQINKFTLIEIV*   | AAAGAACAGATGATGCAGATAAATAGTTACCCTGATAATAGAAAGTGAAGTGA     |
| P52-10 | PY01329 | H2-Ld | YPIINGITLLRV   | 14.94 | WTEVYPIINGITLLRV*   | TGGACTGAGGTATACCCCTATAATAAACGGCATACCCCTGCTGCTGAGGCGTCTGA  |
| P53-1  | PY01329 | H2-Ld | MPFRSANNF      | 29.79 | RNSRMPFRSANNFTFVL*  | CGTAATTCGCGAATGCCCTTTAGAAAGCGCTAATAAATCTACCCCTGTGCATATGA  |
| P53-2  | PY01329 | H2-Ld | SPMPNXYKIL     | 37.35 | PGGKSPMPNXYKILFTIS* | CCAGGGGGTGAAGAGCCCTATGCCTAACTATAAGATCTGTTTACGATCTCCTGA    |
| P53-3  | PY01338 | H2-Kd | KYICTITVI      | 2.44  | RVNRKYICTITTVITEE*  | AGAGTGAATCGTAAGTACATCTGCACCATAACCGCTGATAGTGAAGTGAAGTGA    |
| P53-4  | PY01338 | H2-Kd | YIYINTNNOI     | 2.97  | SRDLYIYINTNNOIAAMQ* | TCTCGTGACCTGTACTACATAAACACATAAACCAGATAGGAGCCATGCAATGA     |
| P53-5  | PY01338 | H2-Kd | KYFVLYLNNL     | 6.42  | KPHNKYFVLYLNNLLQV*  | AAACCACATAAATAAGTACTCTCGTGACTCGTAAGTAACCTGTGCTGCTGTGA     |
| P53-6  | PY01338 | H2-Kd | FYNENSDFI      | 9.59  | TKHVYFNENSDFIRFPA*  | ACTAAGCAGCTATTTCTATAATGAGAATAGTGACTTCATCCGCTTCCCGCGCTGA   |
| P53-7  | PY01338 | H2-Kd | SMNFINTNEISPLD | 10.83 | MNHISFINTNEISPLD*   | ATGAACCACATAAGCTTCTATAAACACCTTTAGTAACTCTCTCTCTAGACTGA     |
| P53-8  | PY01338 | H2-Kd | SYIEFYILNI     | 10.86 | YDLYSYIEFYILNEGV*   | TATGATTATCTGAGCTACATAGATGACTCTACATCTGGAATGAGGGTGTGTGA     |
| P53-9  | PY01338 | H2-Kd | IYNFLCTNI      | 12.02 | DYSVINYNFLCTNILEHE* | GACTATAGCGTGATCTATAAATCTCTGTGCATCAACATCTAGAGAGTGAAGTGA    |
| P53-10 | PY01338 | H2-Kd | IYINNWDKI      | 14.03 | LTENIYINNWDKIKGKK*  | CTGACTGAAACATCTACATAAATAAATGCGGATAAGATAAAAGGTAAAAAGTGA    |
| P54-1  | PY01338 | H2-Kd | SYFDELENI      | 16.71 | LEVESYFDELENIETEV*  | CTAGAGGTAGAAAGCTACTTTGATGAGCTAGAGAACAACCTGAGGTGAAGCTGA    |
| P54-2  | PY01338 | H2-Kd | YIYIYILI       | 21.74 | VLVHYIYIYIILNAPL*   | GTATTAGTGCACTACTACACTACATCTACATAATAATAAACCGCCACTGTGA      |
| P54-3  | PY01338 | H2-Kd | KYKNLLMKI      | 35.99 | VLTEKYKNLLMKIEQDE*  | GTCCCTGACTGAGAAGTATAAAGAACCTGCTGATGAAGATAGAGCAAGAGCAGTGA  |
| P54-4  | PY01338 | H2-Kd | SYNYINQNL      | 38.96 | QVKASYNYINQNLQVDE*  | CAGGTGAAGGCTAGCTATAACATACATAAACACAGAACCTGCAAGTATGAGTGA    |
| P54-5  | PY01338 | H2-Kd | KWNNNSNMNI     | 39.4  | AQKAKWNNNSNMIEOWL   | CGCCAGAAAGCTAAGTGAATAATAATAGTAACATGATAGAGCAGTGGTATTGA     |
| P54-6  | PY01338 | H2-Kd | FYFNEIKHI      | 40.2  | YYQMFFYFNEIKHISLT*  | TATTATCAGATGTTCTACTTTAATGAGATAAAGCAGACATAAAGCTGTGACCTGA   |
| P54-7  | PY01338 | H2-Kd | TLIKMFSHI      | 42.25 | KYVETLIKMFSHIDARL*  | AAGTATGTAGAGACCCGTGATAAAGTGTGTTAGCCACATAGATGACCGGCTTGA    |
| P54-8  | PY01338 | H2-Kd | IYIYIHHI       | 47.53 | FYTKIYIYIHHIHHI*    | TTCTACACTAAAACTACACTACATATAAATGCCACATAATTCACCTGAGTGA      |
| P54-9  | PY01338 | H2-Kd | TYYSNFPKM      | 49.46 | GSAKTYYSNFPKMLISG*  | GGCTCAGCTAAACCTACTATAGTAACCTCCCTAAGATGCTAATAAGCGGTTGA     |
| P54-10 | PY01353 | H2-Kd | LYLNVNNSI      | 7.32  | STIPLYLNVNNSIRVRL*  | TCTACTATACCACCTGTACCTGAACGTGAATAATAGCATGAAGGTGAGATTGTA    |
| P55-1  | PY01353 | H2-Kd | WYKYNANKI      | 33.1  | REVWYKYNYNANKIASEF* | AGAGAGGTGTGGTGGTATAAGTATAAGCTAATAAGATAAGACTGCTGATTTCTGA   |
| P55-2  | PY01353 | H2-Kd | IYSGDSSII      | 46.73 | KKRLIYSGDSSIIISRW*  | AAGAAGAGGCTGATCTATAGCGGTGATAGTAGCATAAAGCCGATGGACATGA      |
| P55-3  | PY01362 | H2-Kd | KKINTFSKI      | 6.31  | SVAKKINTFSKINKAR*   | TCTGTAGCTAAGAAGTTTCATAAACACCTTTAGTAAGATATAAAGGCTAGATGA    |
| P55-4  | PY01362 | H2-Kd | KYNGVPAFI      | 7.47  | IEGDKNYNGVPAFIRAL*  | ATAGAAGGTGATAAGTATAAACCAGGTGCCTGCCTTCATCCTGAGAGCCCTGTGA   |
| P55-5  | PY01362 | H2-Kd | ITNYNIYPI      | 10.81 | PLKIYITNYNIYPIPER*  | CCTCTGAAGATAATCTACACTAACATCTATAAATCACTCTGCTGCTGAGCGATGA   |
| P55-6  | PY01362 | H2-Kd | YYKNMFYKI      | 10.91 | WSDHYKNMFYKILTR*    | TGGTCTGACCACCTACTATAAAGAACATGTTCTATAAGATAATCTAACCCGATGA   |
| P55-7  | PY01362 | H2-Kd | KYIMIIFFI      | 16.9  | TYTAKYIMIIFFIVVHK*  | ACCTACACCCGCTAAGTACATAATGATAATCTTCTCATAGTAGGATCCATAATGA   |
| P55-8  | PY01362 | H2-Kd | QYLYHFQNI      | 30.22 | AVLPQYLYHFQNIAGAI*  | CGCGTTTTGGCCACAGTACCTGTACCACCTCCAGACATAGGCGCTGCCATCTGA    |
| P55-9  | PY01362 | H2-Ld | IPYITGVSM      | 36.18 | TSQKIPYITGVSMDSHR*  | ACTTCCACAGAAGATCCCTTACACCATAGGCGGTGAGCATGAGCCACTCCCGGTGA  |
| P55-10 | PY01370 | H2-Kd | FYLLNLEVI      | 5.8   | RLSSFYLLNLEYIKGPF*  | AGACTTTCTACTTTCTACCTGAAATAACCTAGAGTACATAAAGGACCGCTTCTGA   |
| P56-1  | PY01370 | H2-Kd | YLWISKSWI      | 21.69 | MSSELLYLWISKSWIYN*  | ATGTCTGAAGCTGCTGACTGGATAAAGTAAAGAGCTGGATCTACACTAACCGCTGA  |
| P56-2  | PY01370 | H2-Kd | SWIQFTESI      | 25.08 | KIHNSWIQFTESIHVSV*  | AAAATCCATAAATAGCTGGATCCAGTTCACTGAGAGCATCCCATGCTCTCAGTGTGA |
| P56-3  | PY01370 | H2-Kd | KYWMNLFNEL     | 28.02 | PTLASWMNLFNELWEGS   | CCTACCCTAGCTAGCTGGATGAACCTGTTTAATGAGGCTGTGGAGGGCTCATGA    |
| P56-4  | PY01375 | H2-Kd | KYSSSSSTI      | 1.69  | AVYLYKYSSSSSTIVDSF* | GCGGTTTTACCTGAAGTACATGAGTAGTAGTACGACCATAGGAGTGGATCTCTGA   |
| P56-5  | PY01375 | H2-Kd | IYNOIKTNI      | 13.96 | MLVVIYNOIKNTIKLL*   | ATGCTAGTAGTGATCTATAAACCAGATAAAGACTAACATAAATCTGCTGCTGA     |
| P56-6  | PY01375 | H2-Kd | YVMDNEHIL      | 30.69 | FLEIYVMDNEHILDRPP*  | TTCTAGAGATAGTGTACATGGATAATGAGCAGATCCTAGACGCCCCACCATGA     |
| P56-7  | PY01396 | H2-Kd | LYYVNERTI      | 48.81 | SENDLYYVNERTILIR*   | TCTGAGAATGATCTGTACTAGCTGAATGAGAGAACCATCCTGATCTTGAGGTGA    |
| P56-8  | PY01409 | H2-Kd | SYINKFEAI      | 4.82  | HMPVSYINKFEAIVSTV*  | CACATGCCCTGTGAGCTACATAAATAGTTTGAAGGCCATCTGCTCGACCGTATGA   |
| P56-9  | PY01409 | H2-Kd | FYFYNNKLI      | 23.13 | ADTFFYFYNNKLIVSEA*  | GCTGATACCTTCTTCTACTTCTATAAATAGTGTAGTGTGATGTTTGAAGCATGA    |
| P56-10 | PY01409 | H2-Kd | SYQGCESDI      | 31.76 | RKALSYQGCESDIFAAK*  | CGTAAGGCACTGAGCTACCAGGCGTGTGAGAGTGAACATCTTTGCGGCTAAATGA   |
| P57-1  | PY01409 | H2-Kd | HYLFTQYRL      | 36.92 | PDEKHYLFTQYRLAKLA*  | CCTGATGAGAAGCACTACCTGTTCACCCAGTACAGGCTGAGGAGCTGTGA        |
| P57-2  | PY01412 | H2-Kd | YYFRDTHSI      | 2.89  | NLSGYYYFRDTHSILAA*  | AACCTTTCGGGGTACTACTTTAGAGACACCCATAGCATCCTAGCGCGCTATGA     |
| P57-3  | PY01412 | H2-Kd | FYNDISNSI      | 7.32  | EHOTFYNDISNSIYRRS*  | GAGCACCAGACATTCTATAATGACATAAGTAAAGCATCTAAGGCGTAGCTGA      |
| P57-4  | PY01412 | H2-Kd | SYNNNMLNI      | 8.91  | TNNASYNNNMLNLRQD*   | ACTAATAACGCTAGCTATAATAAATACATGCTGAACATCTGCGCCAGGACTGA     |
| P57-5  | PY01412 | H2-Kd | KYNSNNYNNV     | 23.83 | WLPKYNNNYNNVNDTAK   | TGGCTCCGAGCTAAGTATAATAAATACATATAAATACGTAGACACCTTCAAGTGA   |
| P57-6  | PY01412 | H2-Kd | KYLSYENTV      | 28.98 | GSITKYLSYENTVFLA*   | GGTTCAATAAAGTACCTGAGCTGATGAGAGAACCCGATGATCTTCTAGCATGA     |
| P57-7  | PY01412 | H2-Kd | LYNNNRHNL      | 35.78 | PVKENYNNNRHNLNFTK*  | CCTGTGAAGGAGAACTATAAATACGTGAGACATAACCTGTGTTTACTAAGTGA     |
| P57-8  | PY01412 | H2-Kd | LYLRRSTNI      | 36.84 | HACRLYLRRSTNIQFLD*  | CATGCGCTGTAGACTGTACCTGAGAGAAGACACTAACATCCAGTATGATAACTGA   |
| P57-9  | PY01412 | H2-Kd | IYYNDIYIL      | 37.36 | SCKQIYYNDIYILRPG*   | AGCTGTAACACAGATCTACTATAATGACATCTACATCCTGCGCCCGCGGCGCTGA   |
| P57-10 | PY01412 | H2-Kd | GYPRTLFLNL     | 44.26 | LWTTGYPRTLFLNLVLEK* | CTGTGGAACCCCGGCTATAGACCTACCTGCTTTAACTGATTTCTAGAAAAGTGA    |
| P58-1  | PY01412 | H2-Kd | AYLYGHSIV      | 48.28 | ARSQAYLYGHSIVKEKT*  | GCTAGAAGCCAGGCGCTACCTGTACGCGCCATAGCATAGTAGAAAAGGAGACTTGA  |
| P58-2  | PY01435 | H2-Kd | TYFSNQPFI      | 4.47  | FRFLTYSFNQPFIRLIQ*  | TTTCGGTTCTCAACCTACTTTAGTAACACGCTTTCATAAGGTTGATTCAGTGA     |
| P58-3  | PY01435 | H2-Kd | YYVASVVII      | 7.65  | FTILYYVASVVIHGTG*   | TTTACAATACTCTACTACGTAGCTAGCGTAGTGAATAAATCCATACCGGAGTGTGA  |
| P58-4  | PY01435 | H2-Kd | WFNKNVTSI      | 20.46 | IPKLWFNKNVTSIAYKN*  | ATCCCTAAGCTCTGGTTTAATAAGGTGAGCTAGCACCATAGCATATAAAGAAITGA  |
| P58-5  | PY01452 | H2-Kd | IYHPESNYI      | 19.23 | APVSIYHPESNYIAEY*   | GCACCCGTGAGCATCTACCAACCTGAGAGTAACTACATCTGACTGAGGTTGTGA    |
| P58-6  | PY01452 | H2-Kd | RYLQTIASV      | 21.43 | STLLRYLQTIASVGETS*  | TCGACTCTGCTGAGATACCTGCAGACCATAGCTAGCGTAGGTGAGACTTCTGA     |
| P58-7  | PY01452 | H2-Kd | YYTRHLQIL      | 23.26 | KLMTYYTRHLQILLEM*   | AAATGTATGACATACTACACTAGACACCTGCAGATCCTGCTGATGAAGCATTGA    |
| P58-8  | PY01452 | H2-Kd | NYYTRHLQI      | 33.05 | ASSSNYYTRHLQITAEW*  | GCGTCTTCTCTAACTACTACACTAGACACCTGCAGATAAAGCGCTGAGTGGTGA    |
| P58-9  | PY01520 | H2-Kd | NYMMNLNKI      | 5.65  | RMLLNYMMNLNKIAVEL*  | CGTATGTTGCTGAACACTACATGAATAACCTGAATAAGATAGCTGAGAACCTTGA   |
| P58-10 | PY01533 | H2-Kd | SYEVSDDL       | 26.35 | SKRRSYEVSDDLKALL*   | AGTAAAAGACGTAGCTACTATGAGGTGAGTGAAGCTAGCCCTGTTAATGTGA      |
| P59-1  | PY01533 | H2-Kd | AYSRTIASI      | 29.77 | DSRMAYSRTIASILTSV*  | GATAGTCGCATGGCCTATAGTGAAGTGAAGGCTAGCATCTTGACTAGTGTGTGA    |
| P59-2  | PY01533 | H2-Kd | IYSPNDLII      | 38.38 | CNASIYSPNDLIIVPT*   | TGTAACGCATCTATCTACTATAGCCCTAATGACCTGATCTATGTAACCCCATGA    |
| P59-3  | PY01583 | H2-Kd | NYFENTCNI      | 9.62  | NADCNFYFENTCNIVFVT* | AATGCTGACTGTAACTACTTTGAGAACAACCTGTGAACATAGTCTTGTGAACCTGA  |
| P59-4  | PY01583 | H2-Kd | KYKHYPFI       | 10.24 | DVPRKYKHYPFIPIHLF*  | GACGTGCCCCGTGAAGTACCATACCACTACTTCCCTACCTGCTGATGAGCTGTGA   |
| P59-5  | PY01583 | H2-Kd | KYESFLSFL      | 26.57 | EHELKYESFLSFLSVS*   | GAACATGAAGTGAAGTATGAGAGCTTCCGTAGCTTCTGCTGAGTGTGAGCTGA     |
| P59-6  | PY01583 | H2-Kd | RFNAYLCTI      | 32.3  | LVTARFNAYLCTIIMNP*  | CTAGTAACAGCTAGATTTAACGCGCTACCTGTGCACATCAATGAAGACCCCTGA    |
| P59-7  | PY01583 | H2-Kd | GYYNMNTYV      | 34.99 | YLLSGYYNMNTYVRCGM   | TACCTCTGCTGCTGCTATAATAACATGAACACCTACGTGAGGTGGGTATGTGA     |
| P59-8  | PY01583 | H2-Ld | IPNLYFFFL      | 47.11 | FLASIPNLYFFFLPHRR*  | TTTCTAGCATCCATCCCTAACCTACTGTTCTTCTTCTAGGCGCACCCGCTGA      |
| P59-9  | PY01602 | H2-Kd | LFIPYTFSI      | 44.55 | NKMQLFIPYTFSIKFWQ*  | AATAAGATGCAGCTGTTCATCCCTTACACCTTATAGCATAAAAATCTGCGCAATGA  |
| P59-10 | PY01615 | H2-Kd | AYNNIYSLN      | 14.92 | RMSLAYNNIYSLNLTNA*  | AGAATGAGTCTAGGCTATAATAACATCTATAGTAAGCTGCTGAATCAACGCATGA   |
| P60-1  | PY01615 | H2-Kd | EYMHNTNVI      | 35.49 | IPTVEYMHNTNVIIRDS*  | ATACCTACGCTAGAGTACATGCACACTAAGTCTGCTGATCCCTGCTGATCTCTGA   |
| P60-2  | PY01617 | H2-Kd | FYIAGNAKI      | 43.43 | ACCAFYIAGNNAKINSGS* | GCGTGTTCGCGATCTGGATAGCCGGTAAAGCTGAAGATAAATCTGTTGATAGCTGA  |
| P60-3  | PY01620 | H2-Ld | SPQGTFFIL      | 42.91 | TKLLSPQGTFFILSIEH*  | ACTAAATTTGCTGAGCCCTCAGGCGCACCTCTTCCCTACCTGCTTATGAAGCTGA   |
| P60-4  | PY01622 | H2-Kd | HYISDASGL      | 24.22 | QPAPYISDASGLHVEH*   | CAACCGGCACCCGCTGACATAAGTGACGCTAGCGCGCTGCATGTAGAACATTGA    |
| P60-5  | PY01622 | H2-Kd | VOYAPFYSI      | 27.87 | DTLSLHOYAPFYSLAEK*  | GATTTGAGTCTCCACCAAGTACGCGCCCTTTCTATAGCATAGCTAGAAAAGGCTGA  |
| P60-6  | PY01639 | H2-Kd | NYQVPISL       | 40.58 | VYEGNYQVPISLMDQY*   | GTGTATGAGGGTAACTACTACCGGTCGCTATAAGCCTGATGGACCATGCTGA      |
| P60-7  | PY01639 | H2-Kd | YYNASLVPF      | 46.06 | ALLAYYNASLVPFVLRP*  | GCACCTCTAGCCTACTATAACGCTAGCCTTAGTCCTTCTGCTCCGCCCCCTGA     |
| P60-8  | PY01643 | H2-Kd | KYNNVNATI      | 6.94  | ILMGKYYNNVNATIYAGP* | ATTCTAATGGGTAAGTATAAGCTGAATAACGCGCACCATCTACCGCGGTCATGA    |
| P60-9  | PY01672 | H2-Kd | FYHYHMYTL      | 12.74 | ALSRFYHYHMYTLSDSV*  | GCACCTGAGTAGATTCTACTACCACATAATGTACACCCCTGCTAGATTCAAGTGTGA |
| P60-10 | PY01672 | H2-Kd | FFFNLYTNI      | 15.46 | GFNGFFFNLYTNIKVL*   | GGGTTTAAACGGGTTCTCTTTTAACTGCTGCTGACTAACATAAAGTGAACCTCTGA  |
| P61-1  | PY01672 | H2-Kd | NYINSHIFL      | 16.49 | YAFPNYINSHIFLYALY*  | TACGCTTTCCCTACTACATAAATAGCCACATGCTTCTGCTAGCCTCTACTACTGA   |
| P61-2  | PY01672 | H2-Kd | FYLYSGKSI      | 33.02 | EECLFYLYSGKSIJIGQ*  | GAAGAATGCTGTTCTACCTGATATAGCGGTAAAGCATATAAATAGCAGTGA       |

|        |         |       |                   |       |                      |                                                           |
|--------|---------|-------|-------------------|-------|----------------------|-----------------------------------------------------------|
| P61-3  | PY01672 | H2-Kd | SYSVVLIAI         | 40.89 | LHCVSYSVVLIAIGQRA*   | CTGCACGTGTGAGCTATAGCGTAGTGCTGATAGCCATAGGACAGAGGGCATGA     |
| P61-4  | PY01672 | H2-Kd | KLFYRITIEI        | 41.54 | FMPTKLFYRITIEIWLPA*  | TTCATGCCAACCTAAGCTGTTTAGATACATAAAGCTAGCTGGCTGCCCGCATGA    |
| P61-5  | PY01680 | H2-Kd | FYNNIYLI          | 5     | RAKQFYNNIYLIIRLQT*   | CGAGCTAAGCAATTCTACATAAATAACCTGATCTACATCCCTGCTGCAGACCTGA   |
| P61-6  | PY01680 | H2-Kd | KYISYIKKI         | 8.55  | LHYIKYISYIKKIEPVE*   | TTACATTATATAAAGTACATAAGCTACATAAAGAAGATAGAACCCTGAGAGTGA    |
| P61-7  | PY01680 | H2-Kd | FYIKSNMML         | 8.56  | NHHYFYIKSNMMLKTAV*   | AATCACCATTATTTCTACATAAAGAGTAAATACATGCTGAAGCAGCTGTCTGA     |
| P61-8  | PY01680 | H2-Kd | SYIKHCYLL         | 8.72  | DATVSYIKHCYLLQLLR*   | GATGCTACAGCTGAGCTACATAAAGCACTGCTACCTGCTGCAGCTATCTAGAGATGA |
| P61-9  | PY01680 | H2-Kd | WYNSDNSLSI        | 11.89 | NTTVWYNSDNSLIERNG*   | AACACCACCGTGTGGTATAATAGTGATAATAGCCTGATAGAGAGGGAACCGCTGA   |
| P61-10 | PY01680 | H2-Kd | KYSFYNNVI         | 13.66 | PPISKYSFYNNVIGESV*   | CCACCTATTTTCTAAGTATAGCTTCACTCTAATACGCTGATAGGTGAGAGTGTATGA |
| P62-1  | PY01680 | H2-Kd | YYLDLTLNI         | 15.16 | SSILYYLDLTLNIVYRT*   | TCTAGTATCCTTTACTACCTAGACCTGACCCTGAACATCTATAAGGCGGACCTGA   |
| P62-2  | PY01680 | H2-Kd | CYLLAFSFI         | 17.09 | AAKLCYLLAFSFIRODKI*  | GCCGCTAAGCTGTGCTACCTGCTAGCCTTTAGCTTTCATCCGTGATAAAATATGA   |
| P62-3  | PY01680 | H2-Kd | HMVNNIYFI         | 24.81 | HTDMHMVNNIYFISVYD*   | CACACTGATATGCACATGTATAAATACATCTACTTCATAAGCCTGTATGACTGA    |
| P62-4  | PY01680 | H2-Kd | LYLKTIEI          | 35.12 | EHIELYLKTIEIASPH*    | GAACATATAGAGCTGTACCTGAAGACCATATAAGAGATAGCCTACCCCACTGA     |
| P62-5  | PY01680 | H2-Kd | LYQNCNINI         | 45.88 | QDPVLYQNCNINIYQLC*   | CAGGATCCTGTGCTGTACCAGAAGCTGAACATAAACATCTACCAGCTCTGCTGA    |
| P62-6  | PY01681 | H2-Kd | KYLSRQIQI         | 11.21 | AATQKYSLSRQIQIYVI*   | GCCGCTACCCAGAAGTACCTGAGTAGACAGATCCAGATCCCTATGTGATATGA     |
| P62-7  | PY01681 | H2-Kd | VGNRYFLAVPYIYKAT* | 12.79 | VGNRYFLAVPYIYKAT*    | GTAGGTAACATATAGATACTTCTAGCCGTGCCCTACATCTATAAAGCCACTTGA    |
| P62-8  | PY01681 | H2-Kd | NYHFWFPTPI        | 13.1  | MVCGNYHFWFPTPIQIKA*  | ATGGTCTGTGGTAACCTACCATCTCTGGTCCACCCCTATCCAGATAAAGGCTGA    |
| P62-9  | PY01681 | H2-Kd | RYFDFLNI          | 14.04 | EAEIRYFDFILSLAEAF*   | GAAGCTGAAGCTGAGATACTTTGACTTCTGATCTGAGCTGAGCTGAGGCGCTTTGA  |
| P62-10 | PY01681 | H2-Kd | KYSYDLSKL         | 19.41 | GSPKYSYDLSKLNVGD*    | GGTAGCCCTAAGAAGTATAGCTATGACCTGAGTAGCTGAAGTGAAGTGATTGA     |
| P63-1  | PY01681 | H2-Kd | SYSCMPLCI         | 20.87 | PRSESLYSCMPLCIYRQY*  | CCTAGGAGTGAAGGCTACCTGTGCACTGCCTGTGTCATAAGCTAGGCAATTTGA    |
| P63-2  | PY01681 | H2-Kd | KYEKSMNL          | 21.27 | TEFGKYEKSMNLVLAQL*   | ACTGAGTTCGGTAAGTATGAGAAGGAGTGAAGTAACTAGTAGCCACGCTGTGA     |
| P63-3  | PY01681 | H2-Kd | LYVNLCSAL         | 22.92 | VNSQLYVNLCSALSRAA*   | GTGAACCTCACAGCTGTACGTGAACCTGTGTAGCCGCTGAGTAGAGCAGCATGA    |
| P63-4  | PY01681 | H2-Kd | YFLLSYKI          | 32.28 | SYNIYFLLSYKIIKRT*    | TCTATAAACATTTACTACTTCTCGTGAGCTATAAAGCTATAAAGGAGCACTGA     |
| P63-5  | PY01681 | H2-Kd | RYYNNITDL         | 37.25 | ETGDRYNNITDLTLVLE*   | GAACCTGGTGATAGATATAAATACATAACCACTGACCTGACCTGTAGAACCTCTGA  |
| P63-6  | PY01681 | H2-Kd | KQYVNANSL         | 39.38 | PSFFKQYVNANSLFNL*    | CCGCTGTTTTTAAAGCAGTACGTGAACGCTAATAGCCTGTTAATCTAACCTGA     |
| P63-7  | PY01681 | H2-Kd | SYAHDRDNI         | 42.43 | KLLESYAHDRDNIVDQK*   | AAACTCCTAGAGAGCTACGCCCATGATAGAGATAACATAGATAGATAAACAATGA   |
| P63-8  | PY01681 | H2-Kd | FIMDCYNSI         | 45.94 | SIQSFIMDCYNSIRHVC*   | TCCATCCAGTCCCTCATGATAGACTGCTATATAGCATAGACATAGCAGCTGTGA    |
| P63-9  | PY01681 | H2-Kd | EYNNIFVSI         | 46.74 | HKYSEYNNIFVSIESLE*   | CATAAACTACTGAGTACGTGAACATCTTCGTGAGCATAGAATCTGAGTTGGTGA    |
| P63-10 | PY01681 | H2-Kd | SYKANNQL          | 48.03 | RAYKSYKANNQLTOL*     | AGAGCCTATAAGAGCTATAAAGACGCTAATAACAGCTGACCCAGCTAGGGGTGA    |
| P64-1  | PY01681 | H2-Kd | SYAHIDL           | 49.93 | SSQGSYAHIDL          | TCTAGCCAGGCTAGCTACGCCACATAGACCTGAGCCTGCCACCCGTGAGTGA      |
| P64-2  | PY01681 | H2-Ld | YFPKIKNNL         | 46.68 | WLRLYFPKIKNNLKREG*   | TGGCTGAGGCTTTACCCCTTTAAGATAAAGATAAACCTGAAGCTGAGGGCTGA     |
| P64-3  | PY01681 | H2-Ld | IPHFHINF          | 49.99 | LLTPIPHFHNIFAKAT*    | CTGCTAACCCCAATCCCTCACTTCCACATATAAAGCTTCGCTGAACGACATGTA    |
| P64-4  | PY01682 | H2-Kd | VYNASNNEL         | 40.79 | SYPGVYNASNNELLYKS*   | TCCCTATCCCGGTGTGTATAACGCTAGTAATAATGAGCTGCTGTATAAGAGCTGA   |
| P64-5  | PY01695 | H2-Kd | YMHMNNV           | 5.45  | IYGEYMHMNNVNAVWGA    | ATATATGGTGAGTACTACATGCACATGATAATAGCTAGCTAGTATAGGGGCTGA    |
| P64-6  | PY01695 | H2-Kd | YYNAFHII          | 6.4   | VAEDIYYNAFHIISSPC*   | GTAGCTGAAGATATCTACTATAACGCTTCCACATAATCTCCCTACCTTGTCTGA    |
| P64-7  | PY01695 | H2-Kd | AYTNYVLSI         | 17    | MYLQAYTNYVLSIQSDA*   | ATGTATCTGCAAGCCTACACCTATAACTATAGCTGAGCATGAGCTGATGCTGCTGA  |
| P64-8  | PY01695 | H2-Kd | SYNNANVSL         | 17.87 | YLSPSYNNANVSLSKQF*   | TATCTGTCTCTAGCTATAACTACGCTAACGCTGAGCCTGTCTAAGCAGCTCTGA    |
| P64-9  | PY01695 | H2-Kd | YYNAFHII          | 19.99 | DARPYYYNAFHIIIVLSE*  | GATGCTAGACCTTACTATAACGCTTCCACATAATAATAGTTGTCTGTGAATGA     |
| P64-10 | PY01695 | H2-Kd | LYLSNSLEI         | 22.08 | VYELLYLSNSLEIYACD*   | GTGTATGAACCTACTGTACCTGAGTAATAGCCTAGAGATCTACGCATGTGACTGA   |
| P65-1  | PY01695 | H2-Kd | YVYIKYKEI         | 30.84 | YRKVSYVYIKYKEIAKIE*  | TACCGTAAGTCTGTGTACATAAAGGTGTATAAGGAGATAGCTAAGATAGAATGA    |
| P65-2  | PY01695 | H2-Kd | VIPIGEL           | 35.06 | PVRAYVPIGELIPEW*     | CCCGTGAGGGCAGTGTACCTCCTACTGAGTGAGCTAGTACCTGAAGTGGTGA      |
| P65-3  | PY01695 | H2-Kd | YEEQVQNEL         | 35.24 | FPHSYEEQVQNELEGAE*   | TTCCACATAGCTACTATGAGCAGGTGCGAGAATGAGCTAGAAGGCTGTGAGTGA    |
| P65-4  | PY01695 | H2-Ld | YYINYLKM          | 13.17 | MWVEYYPINYLKMPILL*   | ATGTGGGTAGAGTACCCCTTACATAAATCACTGCTGAAGATGCCAATTTTGTCTTGA |
| P65-5  | PY01712 | H2-Kd | KWQNLISAYI        | 34.41 | DSKPKWQNLISAYIALEC*  | GATTCTAAACCTAAGTGGCAGAACCTGAGCGCTCATAGCATAGACTAGAGTCTGA   |
| P65-6  | PY01717 | H2-Kd | FYFSTDYNL         | 9.71  | IYRSFYFSTDYNLLEKFC*  | ATTTATCGACTCCTTCTACTTCACTAGCTATACCTAGAGTTAAGTGTGCTGA      |
| P65-7  | PY01717 | H2-Kd | NYMWNFEKI         | 9.83  | KALTYNYMWNFEKISITQ*  | AAAGCCTTGACTAACTACATGAACCTGGTTGAGAAGATCTCGATAACTCAGTGA    |
| P65-8  | PY01717 | H2-Kd | FYISSKILL         | 18.77 | ASMQFYISSKILLVSFK*   | GCTAGTAGCAATTTCTACATAAGTAGTAAGACTCTGCTAGTAGTCTTTAAGTGA    |
| P65-9  | PY01750 | H2-Kd | KYINYNHIL         | 4.34  | LLVRKYINYNHILARTS*   | CTCCTAGTTCGTAAGTACATAAAGCTGAACACCATCTAGCTGCAACCTCCTGA     |
| P65-10 | PY01750 | H2-Kd | IYFYIFII          | 34.02 | QRGVIFYFYIFIGARV*    | CAGCGGGGTGTAACTACTTCTTCTACATCTTCTATAAAGGGGCGAGGGTCTGA     |
| P66-1  | PY01754 | H2-Kd | LYMAHPNYL         | 8.26  | VSSTLYMAHPNYLGLAV*   | GTGTCTCCACCCGTGATACATGCCCCACCCCTAACTAAGCTAGCTGCTAGTGTGA   |
| P66-2  | PY01754 | H2-Kd | KYAPHNKEI         | 27.92 | DIRHKYAPHNKEIAATV*   | GACATAAAGGCATAGTACGCCCCCTCATAAAGGAGATAGCAGCTACAGTATGA     |
| P66-3  | PY01754 | H2-Kd | KYKKVLLPI         | 32.26 | MFKTKYKKVLLPILKKA*   | ATGTTTAAACCTAAGTATAAAGAAGGTGCTGCTGCCTATCCTCTGAAAGCCCTGA   |
| P66-4  | PY01761 | H2-Kd | KYLLNFMIM         | 6.1   | RTGRKYLLNFMIALDE*    | CGAACTGGACGTAAGTACCTGAATAACCTTCATAATGATAGCTGTAGATGAATGA   |
| P66-5  | PY01761 | H2-Kd | YYENNINIL         | 6.95  | QNOCYYYENNINILTAGV*  | CAGAATCAGTGTTACTACTATGAGAATAATAACATCTGACAGCGGGCGTCTGA     |
| P66-6  | PY01761 | H2-Kd | KYYEYNNNI         | 10.41 | RVEYKYYEYNNNINCSN*   | CGTGAGATAATAAGTACTACTATGAGAATAATAACATAAATCTGATGTAAGTGA    |
| P66-7  | PY01761 | H2-Kd | YYNYNYLCI         | 11.5  | QSKAKYYNYNYLCIERDH*  | CAAGTAAGGCTAAGTACATAAACTACTACTCTGTGCATAGAAGAGATCAATGA     |
| P66-8  | PY01761 | H2-Kd | KYQYNNTFI         | 12.81 | WDLSYQYNNTFIDIMQR*   | TGGGACCTGTCCCTACAGTTCCTTACATAAAGCACTTCTAGACAGTCAGAGGTTGA  |
| P66-9  | PY01761 | H2-Kd | FYNNTFIFL         | 12.87 | RLKHFYNNTFIFLDDL*    | AGACTGAAACATTTCTATAAATACACCTTCACTTCTAGATGAGCAGCTGTGTA     |
| P66-10 | PY01761 | H2-Kd | KYLLFNKL          | 35.58 | LDHPKYLLFNKLKPIG*    | CTAGATCACCCCTAAGTACCTGTACCTGTAAATAGCTAGGACGCTAGCTGTGA     |
| P67-1  | PY01770 | H2-Kd | YYESTLSL          | 5.32  | VSKWYYESTLSLIRPV*    | GTGTCTAAGTGGTACTACTATGAGAGACCCCTGAGCCTGATTGCCCCGTGTGA     |
| P67-2  | PY01779 | H2-Kd | YYSYFTPL          | 6.22  | ADAMRYHSYFTPLAGLG*   | GCTGACGCAATGAGATACCATAGCTACTTCAACCCCTGACAGGAAGTGTGTA      |
| P67-3  | PY01779 | H2-Kd | YILSYRI           | 35.05 | LISEIYLSRIYRILEG*    | TTGATCTCTGAGATCTACCTGAGTGAATCTATAGAATCTGATGAGGGGTGA       |
| P67-4  | PY01779 | H2-Kd | SYFTPLNVY         | 43.49 | FSIDSYFTPLNVYLDDEW*  | TTCTCGATAGATAGCTACTTCAACCCCTGCAACTGCTGCTAGATGAGTGTGA      |
| P67-5  | PY01786 | H2-Kd | NYNYNLDII         | 35.53 | LAASNYNYNLDIIHVV*    | TTAGCCGCGTCTAAGTATAAATCACTAGACATATAAGAGCATGTAGTGTGA       |
| P67-6  | PY01824 | H2-Kd | IYLPETFTL         | 37.34 | KSYWIYLPETFTLVTLA*   | AAATCTACTGGATCTACCTGCTGAGACCTTCACTGATAGTAACTTACGCTGA      |
| P67-7  | PY01855 | H2-Kd | RYFFMYEL          | 13.28 | EGEGRYFFMYELGLEV*    | GAGGGTGAAGGTAGATACCTTCTTCACTATGATGAGCTAGGACTAGAAGTGTGA    |
| P67-8  | PY01855 | H2-Kd | SYVNNKSL          | 19.4  | HDHKSYYVNNKSLTQLH*   | CATGATAAGCATAGCTACTACGTGAATAAGAGAGCCTGACTGAGCTGCACTGA     |
| P67-9  | PY01855 | H2-Kd | HYITVSLCI         | 32.25 | GRVPHYITVSLCIELPP*   | GGCCGTGTGCCACACTACATAACCCGTGAGCCTGCTGATAGCAATCTTCCCTCATGA |
| P67-10 | PY01855 | H2-Kd | TMFESNSFI         | 37.73 | FTNHMTFESNSFIGETL*   | TTCACTAACCCACCATGTTTGAAGATATAAGCTTCATAGATGAGACACTGTGA     |
| P68-1  | PY01855 | H2-Kd | YFFMYELI          | 38.03 | KKVPYFFMYELIURCFG*   | AAAAAGGTACCGTACTTCTTCTACATGTATGAGCTGATAGAAGGTGTTTGAATGA   |
| P68-2  | PY01855 | H2-Kd | SYSFHTGFL         | 45.63 | YECGSYSFHTGFLICEP*   | TATGAGTGTGGTACTATAGCTTCCACCCGCTTCTGATCTGTGAACCGTGA        |
| P68-3  | PY01876 | H2-Kd | TYLCKPETI         | 40.53 | TSCHTYLCKPETIGSQV*   | ACCTCATGCCACACTACCTGTSTAAGCCTGAGACCATAGCCGCGCCAGGTATGA    |
| P68-4  | PY01912 | H2-Kd | LYNLKTDII         | 41.37 | SCNPLYNLKTDIICPI*    | TCTATGAACCCCTGTATAAATAGCTGACTGACATAAATCGGCCCAACTCTGA      |
| P68-5  | PY01912 | H2-Kd | KQLEPTWSI         | 47.01 | TLVSKQLEPTWSILKRE*   | ACCTAGTGTCTAAGCAGCTAGACCTACTCTGGAGCATCTCTGAAAGGGAGTGA     |
| P68-6  | PY01912 | H2-Kd | QYAKVDFL          | 49.09 | AAWLQYAKVDFFLASAE*   | GCCCGCTGGCTCCAGTACGCTAAGGTGTTTGACTTCTGATAGCTGAGTGTGA      |
| P68-7  | PY01922 | H2-Kd | NYLNNYTSI         | 3.15  | ELLVNYLNNYTSIEYFD*   | GAGCTGCTAGTGAACCTACCTGAATAACTACATAGCATAGAGTACTTTGATTGA    |
| P68-8  | PY01922 | H2-Kd | KYMILLFSI         | 6.73  | EASHKYMILLFSIKVYRR*  | GAAGCTAGCCATAAGTACATGACTGCTGCTTTAGCATATAAGGTGAGGCGCTGA    |
| P68-9  | PY01922 | H2-Kd | LYYFISTOI         | 16.85 | SYCPLYYFISTOIQCRN*   | AGCTATTGTCCCTGTACTACTTCATAAGCACCCAGCTCCAGTGTGCTAGACTGA    |
| P68-10 | PY01922 | H2-Kd | LYFFISTYNEI       | 18.87 | APKQNYFFISTYNEIYNFP* | GACCTAAGCAAAAACCTACTTCTTCACTTATAAAGTACGATGAGTAATTTCCCTGA  |
| P69-1  | PY01922 | H2-Kd | YYKAMCAI          | 34.37 | LLLDYKAMCAIQDIR*     | TTGCTGCTAGATTAAGTATAAAGAGGCCATGTGCGCCATCCAAGATATCCGCTGA   |
| P69-2  | PY01922 | H2-Kd | SEYEYSYII         | 41.72 | LGDHSEYEYSYIISQSS*   | CTAGGTGACCATAGTGAATGAGTATAGCTACTACATCTCTCAGTCTAGCTGA      |
| P69-3  | PY01922 | H2-Ld | IPFFTFDQL         | 38.34 | AYYPIPFFTFDQLPSLS*   | CGCTATTATCCAATCCCTTCTTCACTTTTGACCAGCTGCTGAGCTGAGCTGTGA    |
| P69-4  | PY01925 | H2-Kd | SYHTTLIMI         | 13.39 | HGNSSYHTTLIMIDLST*   | CATGGTAACCTAGCTACCACACCACCTGATAATGATAGACTCACTAGTCTGA      |
| P69-5  | PY01938 | H2-Kd | LYLMLMSTM         | 47.15 | EHAKEYLMLMSTMVAP*    | GAGCATGCTAAACTGTAACCTGATGACACTAGCATAGCAGCTGAGGCGCCCTGA    |
| P69-6  | PY01947 | H2-Kd | SLYLSLSKI         | 4.79  | ATKCKYLSLSLSISLNL*   | GCTACTAAGTGTAAGTACCTGAGTACGCTGAGCTGCATAAGTTTGAATCTATGA    |
| P69-7  | PY01947 | H2-Kd | KYIETVKEI         | 9.76  | IFRESYIETVKEIHFDI*   | ATTTTGAAGAGAGCTACATAGAGACCCGTGAAGGAGATCCACTTTGACATCTGA    |
| P69-8  | PY01947 | H2-Kd | KYLVLFVSI         | 16.19 | ALIKLYLVLFVSIITLEK*  | GCCTTGATAAAGCTGTACATAGTAGTCTGTTTAGCATAAACCTAGAAGAGTGA     |
| P69-9  | PY01983 | H2-Kd | KYMLQIDTI         | 6.97  | FALLKYMLQIDTIVNKW*   | TTTGCTCTGAAGTACATGCTGCAGATAGACACATAGAGTGAAGTGTGTTGA       |
| P69-10 | PY01983 | H2-Kd | YYSYMCIYI         | 9.36  | WQKLYSYMCIYIYVGD*    | TGGCAGAAGCTGTACTATAGCTACATGTGCATCTACATAGTAGGTGACTGTTGA    |
| P70-1  | PY01983 | H2-Kd | YQLLNYSSI         | 12.56 | AQSGYQLLNYSSILKE*    | GCTCAGTCTGGATACCACTGCTGACCTATAGTAGCATCTCTGAAGGAAAAGTGA    |
| P70-2  | PY01983 | H2-Kd | SYFFNFSSF         | 14.68 | NVTTYSYFFNFSSFAPEA*  | AATGTAACAACCTAGCTACTTCTTAACTTTAGTAGTCTGCGACCTGAGGCTGA     |
| P70-3  | PY01983 | H2-Kd | KYMDQINYI         | 16.28 | QTLTKYMDQINYIKFTT*   | CAAACTTTGACTAAGTATAATGACCAAGCTAATCACTAAGTTTCAACCCCTGA     |
| P70-4  | PY01983 | H2-Kd | GYNTYSSPV         | 21.63 | FLGQGYNTYSSPVFSKR*   | TTCTAGGGCAGGGCTACATGACCTATAGTACCCCTGTGTTAGTAAGCGATGA      |
| P70-5  | PY01983 | H2-Kd | SYMICYIFL         | 25.34 | LVLVSYMICYIFLDAFE*   | CTAGTCTAGTGAAGTACATGTGCATCTACATCTTCTGATGTTTGTAGTGA        |
| P70-6  | PY01983 | H2-Kd | KYTHIDNYI         | 29.08 | STKEKYTHIDNYIYSHK*   | TCCAATAAGGAAAAGTACACCATCCATGATAAATCAATGATTTCTAAGCACTGA    |
| P70-7  | PY01983 | H2-Kd | FYHKEYVQI         | 30.06 | ACQCIFYHKEYVQIAHPN*  | GCATGTACAGTGTCTTACCATAAAGGAGTACGTGCAGATAGCCCATCTCAATTGA   |
| P70-8  | PY01983 | H2-Kd | NYVNDPNYI         | 37.53 | APNNYNYVNDPNYIFMSG*  | GCTAATCCTAATAACTACGTGAATGACCCCTACATACATCTTCTATGTCGGGTGA   |
| P70-9  | PY01983 | H2-Kd | KYIIYIQLP         | 40.22 | LMSHKYIIYIQLKLQ*     | CTAATGTCCCATAAAGTACTACTACATCTAACGCTGCTGAAGTTGAGCCCTGA     |
| P70-10 | PY01983 | H2-Kd | IYESNRYNI         | 42.75 | QDKDIYESNRYNISIYR*   | CAAGATAAAGGATATCTATGAGAGTAATAGATATAAATCTCTCTATTATAGATGA   |
| P71-1  | PY01983 | H2-Kd | KYAGCFLIL         | 46.71 | VPKYKYAGCFLILPAGL*   | GTGCTTAATAATAGTACGCGCACTGCTTCCGTGATCTGCCAGCTGGCCTGTGA     |
| P71-2  | PY01983 | H2-Kd | SYKFNIFLL         | 48.24 | MAYGSYKFNIFLLDRCI*   | ATGGCTTACGGTAGCTATAAGTTTAAACATCTTCTGCTGAGCCGCTGATCTGA     |
| P71-3  | PY01983 | H2-Kd | KYISNFIFF         | 49.74 | IKSLKYISNFIFFSEAV*   | ATAAAGAGCCTGAAGTACATAAGTAACTTCACTTCTTCTCTGAGCGGTGTGA      |

|        |         |       |             |       |                      |                                                             |
|--------|---------|-------|-------------|-------|----------------------|-------------------------------------------------------------|
| P71-4  | PY01989 | H2-Kd | KYTCDFSII   | 6.49  | LQAVKYTCDFSIIINWER*  | CTGCAGGCCGCTGAAGTACACCTGTGACTTTAGCATATAAAATGGGAGAGATGA      |
| P71-5  | PY01999 | H2-Kd | KYMYKNDII   | 9.7   | FTMLKYMYKNDIIPCRV*   | TTCACTATGCTGAAGTACATGTATAAAGATGACATAACCCATGATAGGGGTGTA      |
| P71-6  | PY02022 | H2-Kd | KMYMLTFSFI  | 3.64  | GGPNMYMLTFSFICFDA*   | GGCGGGCGCTAACATGTACATGCTGACCTTTAGCTTCACTGTTTGGACCTGTA       |
| P71-7  | PY02022 | H2-Kd | RYCWPFSSQI  | 10.02 | VLRCRYCWPFSSQIMRYP*  | GTGCTTCGCTGTAGTAACTGCTGGCCCTTTAGCCACAGATAAGGAGTATCCCTGA     |
| P71-8  | PY02022 | H2-Kd | IYSNTNLSI   | 16.43 | EGLKIYSNTNLSIPLGA*   | GAGGGCCTGAAGATCTATAGTAACACTAACCTGAGCATCCCATTAGGGGCCCTGA     |
| P71-9  | PY02022 | H2-Kd | YFNFYLYPL   | 21.74 | GGNFFYNFYLYPLESRD*   | GGGGGTAATTTTTTCTATAACCTTCTACCTGTACCCCTCTAGAGCTTAGGGATTGA    |
| P71-10 | PY02022 | H2-Kd | IYIFNLRI    | 26.39 | AYLLIYIFNLRIEIVST*   | GCATATTTTGTGATCTACATCTTTAACCTGAGAAAGATAGAGGTTGCCACCTGA      |
| P72-1  | PY02022 | H2-Ld | YFMFSFIF    | 18.3  | HKFVYFPMFISFIFKLNR*  | CATAAGTTCGCTCTTCCCTATGATCTTTAGCTTCTATCTTTAAGCTCGCGTAAGTA    |
| P72-2  | PY02022 | H2-Ld | WYFQSIIYIF  | 37.34 | DKAPWPFSSQIYIFLLVF*  | GATAAAGCCCCATGGCCCTTTAGCCAGATCTACATCTTCTCGCTAGTGTITTTGA     |
| P72-3  | PY02029 | H2-Kd | LYNHVLVNI   | 24.11 | LPTQLYNHVLVNIIVSPT*  | CTGCCACCCAGCTGTATAAACCAGCTGTAGTGAACATCTTACAGCCGACCATGTA     |
| P72-4  | PY02029 | H2-Kd | CWTKNNSTI   | 42.71 | SKWRWCWTKNNSTIDNPR*  | TCTAAGTGGAGATGCTGGACTAAGAATAATAGCACCATAGATAACCCCGGCTGA      |
| P72-5  | PY02029 | H2-Kd | KYFSALRCL   | 49.93 | KILSKYFSALRCLLEDL*   | AAGATTCTGAGTAAGTACTTTAGCGCCCTAGAGTCCCTAGAGGATTTGCTCTGA      |
| P72-6  | PY02032 | H2-Kd | SYISSTEKL   | 13.31 | MMNLSYISSTEKLSHES*   | ATGATGAACCTGAGCTACATAAGTAGCAGCTGAGAAGCTGAGTGAGTACACATTGA    |
| P72-7  | PY02047 | H2-Kd | SYFHYQNFI   | 2.93  | PQELSYFHYQNFIAEHR*   | CCACAAGAGCTGAGCTACTTCCACTACCAGAACTTCTAGCTGAGCATGCTGTA       |
| P72-8  | PY02047 | H2-Kd | TFIPNDTTI   | 17.71 | KLFRITFIPNDTTIGRQI*  | AAGCTCTTTTCGGACCTTCATCCCTAATGACACCCACCATAGGTAGACAGATTGA     |
| P72-9  | PY02076 | H2-Kd | LYIHLNFTL   | 19.64 | LTSLLYIHLNFTLRKEE*   | TTGACCTCCCTGCTGTACATCCACCTGAACTTCAACCTCGCTGAAGAGAGGTGA      |
| P72-10 | PY02084 | H2-Kd | SYGTGYVYRI  | 30.5  | IQSPSYGTGYVYRISPT*   | ATTACAGTCTAGCTACGCGCACCTACACTGCTGAGAATCTCACCAACCGGATGA      |
| P73-1  | PY02084 | H2-Kd | NYTGKVFNAI  | 31.77 | LGVNTNYTGKVFNAIGFG*  | CTAGGCCGTGACTAACTACACCGGCGCTGTTTAAACGCCATAGGTAATTCGGATGA    |
| P73-2  | PY02110 | H2-Kd | KYTFGKFIYNI | 8.62  | QSMAKYTFGKFIYNISPT*  | CAATCTATGGCTAAGTACTTTAAGAAGTCTTATAAGATGACCGCCACTCTGTA       |
| P73-3  | PY02120 | H2-Kd | LYVASISYI   | 4.68  | QQESLYVASISYILOWK*   | CAACAGGAATCCCTGTACGTAGCTAGCATAACTACATCTTCAATGGAAGGTGA       |
| P73-4  | PY02120 | H2-Ld | ILPILFSYV   | 45.54 | PSPAIPILFSYVLPDSF*   | CCCTCCCTGCTATCCCTCTGATCTTTAGCTACGTGCTGCTGACTCGTCTCTGA       |
| P73-5  | PY02143 | H2-Kd | SYVNLSSGYI  | 17.32 | LSVSYVNLSSGYIEAPR*   | CTCTCTGTGTATAGCTACGTGAACCTGAGCGGCTGAGAGGCTGACCCGCTGA        |
| P73-6  | PY02143 | H2-Kd | YVTPNLVMI   | 23.84 | LDQKYVTPNLVMIGEEH*   | CTAGACCAGAAAGTGTACACCCCTAACCTAGTGATGATAGGTGAAGAGCACTGA      |
| P73-7  | PY02175 | H2-Kd | KYLSIHEYL   | 18.12 | RVKKYLISIHEYLISYM*   | CGAGTGAAGAAGAAGTACCTGAGCATCCATGAGTACATCTCACCAACCGGATGA      |
| P73-8  | PY02175 | H2-Kd | KYLNLYVSL   | 18.25 | ESVEKYNLNYVSLHTLL*   | GAGTCAGTAGAGAAGTATAACCTGAACCTGAGCTGAGCCTGCATACATTGCTGTGA    |
| P73-9  | PY02180 | H2-Kd | SYCEYCSYI   | 8.8   | LVKLSYCEYCSYIPALV*   | CTAGTGAAGCTGAGCTACTGTGAGTACTGTAGCTACATCCCTGAGCTAGGTGA       |
| P73-10 | PY02180 | H2-Kd | KYIKINFL    | 9.55  | FGGNSYIKINFLDWA*     | TTTGGAGGTAATAGCTACATAAGATAAACTACTTCTAGACTGGGCAACATGA        |
| P74-1  | PY02180 | H2-Kd | SQTNMFESI   | 34.13 | GPPMKQTNMFESISDKE*   | GGACCTCCTATGAAGCAGACTAACTTCTGAGAGCATCTCTGATAAGGAATGA        |
| P74-2  | PY02180 | H2-Kd | HYGPPYNOI   | 37.91 | QVNSHYGPPYNOISERG*   | CAAGTGAATTCCCCTACCGGCCCTTATAACCAAGAACATCTCTGAGAGAGGATGA     |
| P74-3  | PY02180 | H2-Kd | FYSCVSNGL   | 38.49 | TNEEFYSCVSNGLMISR*   | ACTAATGAAGAGTCTCTATAGCTGCGTGAGTAACCGGCTGATGATATCTAGATGA     |
| P74-4  | PY02181 | H2-Kd | IYYSGRITI   | 7.04  | VSPHIYYSGRITILFIA*   | GTTTCCCCCCCACATCTACTACGGTAGTAGTAATAACCATCTGATTCAGGCTGA      |
| P74-5  | PY02181 | H2-Kd | AYGNOYTFI   | 10.83 | CMCVAYGNOYTFISPVQ*   | TGTATGTGCGTAGGCTACGGCCAGAGACTACACCTTCACTTCCCTGCTACAGTGA     |
| P74-6  | PY02181 | H2-Kd | IYICSENSL   | 12.45 | VRFNICYICSENSLKRKR*  | GTGAGGTTTAAATATCTACATCTGTAGTGAGATAAGCTGAAGAGAAGAGGTGA       |
| P74-7  | PY02181 | H2-Kd | AYYTISHYL   | 16.17 | SLINAYYTISHYLLHNH*   | TCACTAATAAAATGCCTACTACACCATAAGCCCACTACCTGTTTACATAAACCACCTGA |
| P74-8  | PY02181 | H2-Kd | QYFEGIMKI   | 19.15 | FIAPQYFEGIMKIPSPY*   | TTCTAGCTCCTCAGTACTTTGAGGGCATAATGAAGATAAACCCCTAGCTATTGA      |
| P74-9  | PY02181 | H2-Kd | PMYMGLLHI   | 28.8  | VTYDPMYMGLLHIWDST*   | GTAACGTATGACCCTTACATGAACGGCCGTGCTGCACATCTGGGATGATACCTGA     |
| P74-10 | PY02189 | H2-Kd | SYIDTFYSI   | 2.11  | ERTASYIDTFYSIPTAN*   | GAGAGGCCGCTAGCTACATAGACACCTTCTATAGCATCCCAACTGCTAATTGA       |
| P75-1  | PY02189 | H2-Kd | YYLNGYYLI   | 3.75  | QEHDYYLNGYYLISIN*    | CAGGAACATGATTACTACCTGAACGGCTACTACCTGATCTCCATCTCTAACTGA      |
| P75-2  | PY02189 | H2-Kd | YYIYIFNI    | 4.9   | FLUTYYIYIFNIGIAR*    | TTCTGTATAACCTACTACATCCAGTACATCTTTAACATAGGTATAGCTAGATGA      |
| P75-3  | PY02189 | H2-Kd | YYFKAIRNI   | 11.39 | DSSGGYYFKAIRNIQSP*   | GATAGCGGGGGATACTACTTTAAGGCCATAAAGAACATCCAGTCTCCGACCTGA      |
| P75-4  | PY02189 | H2-Kd | LYYINVIDN   | 20.92 | VRIEYINVIDNVAEEA*    | GTTTCGTATAGAATACTACATAAACCGTGATAGATAACGTAGCGGCTGAGGCGTGA    |
| P75-5  | PY02189 | H2-Kd | AYSNNVTSL   | 21.4  | LTLAAYSNNVTSLLLEHA*  | CTAACACTAGCCGCTATAGTAAGAATAACACTAGCCTGCTAGAGCATGCTTGA       |
| P75-6  | PY02189 | H2-Kd | QYLEGILPL   | 31.44 | ETAIQYLEGILPLVQTE*   | GAACAGCCATACAGTACCTAGAGGGCATCTGCTCCTAGTGCAGCACTGAATGA       |
| P75-7  | PY02189 | H2-Kd | AYLDIHLI    | 32.33 | KLLWAYLDIHLIFVLV*    | AAGCTGCTGTGGGCCCTACCTAGACATCTCGACCATCTTCTGCTGCTAGGTGA       |
| P75-8  | PY02189 | H2-Kd | RFYFMLSII   | 32.61 | AESNRFYFMLSIIIPIT*   | GCTGAATCTAATAGATTCTACTTCTAGCTGAGCGCTGATAAATCCCATACCGTGA     |
| P75-9  | PY02189 | H2-Kd | FYGVKREII   | 34.56 | GWMWFYGVKREIIKTWS*   | GGATGGATGTGGTCTACGGTAAGGTGAGAGAGATAAAGACCTGGTCTTGA          |
| P75-10 | PY02189 | H2-Kd | CYKDNVNNI   | 38.68 | EESKCYKDNVNNIHLNR*   | GAAGAAAGTAAGTGCTATAAAGGATAACGCTGAATAACATCCAGCTGCGTAATTGA    |
| P76-1  | PY02189 | H2-Kd | IYSPNDNHL   | 41.58 | QLNNIYSPNDNHLVNNK*   | CAGCTGAATAATATCTATAGCCCTAATGATAACCCACTAGTAGTGAATAAGTA       |
| P76-2  | PY02189 | H2-Kd | SYLLNOKNI   | 43.35 | ARTLSYLLNOKNIHCP*    | GCTAGAACACTGAGCTACCTGCTGAACCGAGAAGAACATCCAGTCCGCCCTTGA      |
| P76-3  | PY02189 | H2-Kd | CYSHLFIKI   | 48.52 | LDKLSYSHLFIKISPN*    | TTAGATAAGCTGAGCTATAGCCACCTGTTTCATAAAGATCTCGCCTAATTTCGTGA    |
| P76-4  | PY02196 | H2-Kd | SYSCNLCPI   | 8.09  | SAYTCYSCNLCPIGLAG*   | AGCGCCTATACGTGCTATAGCTGTAACCTGTGCCCTATAGGCCCTAGCAGGATGA     |
| P76-5  | PY02196 | H2-Kd | NYEYEMDOI   | 11.28 | LLRDNYEYEMDOINSSR*   | CTTCTGCGTGATAACTACTATGAGTAGACTGATAAATCAAGTAGTAGTAGATGA      |
| P76-6  | PY02196 | H2-Kd | KYTHGLKAI   | 15.62 | LHKWKYTHGLKAISVEQ*   | CTTCTAAGCTGGAAGTACACCCACGGCCTGAAGCGCCATAAAGCAACAGTGA        |
| P76-7  | PY02196 | H2-Kd | GYIFNEKI    | 25.95 | QAMQGYIFNEKTRIMRA*   | CAAGCCATGCAGGGCTACATCTTTAATGAGAAGACCATAAGAATGCCGCGCTGA      |
| P76-8  | PY02196 | H2-Kd | KYKNLFIPI   | 39.81 | NGDFKYKNLFIPIIDYN*   | AACGGTGATTTTAAGTATAAGAACCTGTTCTACCTCTATAGATTATAATTATGA      |
| P76-9  | PY02196 | H2-Kd | FFHKNYHYI   | 47.62 | SIEIFFHKNYHYITSS*    | TCCATAGAAATTTCTTCCATAAGAAGTACTACCACTAGATAACCTCATCCACCTGA    |
| P76-10 | PY02230 | H2-Kd | YFIGNFTTL   | 2.6   | RAARFYIGNFTTLEVIM*   | AGAGCCGCACGATTCTACATAGGTAACTTCAACCAACCTAGAGGCTAATAATGTGA    |
| P77-1  | PY02230 | H2-Kd | SYFNYQNEI   | 2.91  | KLWASYFNYQNEIARLV*   | AAGCTGTGGGCTAGCTACTTTAACTAACCATAGATAGATAGCTAGGTGATTGTA      |
| P77-2  | PY02230 | H2-Kd | KYSNLETSI   | 4.97  | YGLLKYSNLETSIPLGF*   | TATGGACTGCTGAAGTATAGTAACCTAGAGACTAGCATCCCTGGGCTATTGTTGA     |
| P77-3  | PY02230 | H2-Kd | SYVMNLTDL   | 8.49  | VPNASYVMNLTDLNLF*    | GTTCCATAAGCCTAGCTACTACGTGATGGACACCATCTGAACTTTCTCCATGA       |
| P77-4  | PY02230 | H2-Kd | KYIDDKYNL   | 20.06 | EPNYKYIDDKYNLPRIA*   | GAACCTAATTAAGTACATAGATGATAAGTATAACCTGCCCGGGATAGCGTGA        |
| P77-5  | PY02230 | H2-Kd | KEMPVIEYI   | 31.44 | TYLTKEMPVIEYISLVR*   | ACATATCTGACTAAGGAGATGCGCTGTGATAGAGTACATCTCCCTGATGAGATTGA    |
| P77-6  | PY02230 | H2-Ld | FPLININYF   | 22.67 | DKRVFPLININYFSSPQ*   | GATAAGCGTGTTTTCCCTCTGATAAACATAAACTACTTCTCGTCTCCACAATGA      |
| P77-7  | PY02239 | H2-Kd | FYHNHAKMMI  | 20.82 | WLRLFYHNHAKMMIOAFR*  | TGGTTGCGTTTATTCTATAACCAACGCTAAGATGATGATCCAGGCAATTCGCGTGA    |
| P77-8  | PY02258 | H2-Kd | IYANSLNI    | 18.53 | PTHIYANSLNINILP*     | ACCATTCCGCACATCTACGCTAATAGCCTGCTGAACATAAATATCCCGCTGTA       |
| P77-9  | PY02258 | H2-Kd | GYAGLYVEI   | 30.96 | CDVAGYAGLYVEIAEVS*   | TGTGACGTAGTGCTACGCGCGGCTAGTGTATGAGATAGAGCTGAAGTGCTCGTA      |
| P77-10 | PY02294 | H2-Kd | HYLRAIPLN   | 31.91 | MCPRHYLRAIPLNLTNL*   | ATGTGCCCTCGCCACTACCTGCTGAGAGCCATCCCTAACCTGTCTAATCTTATGA     |
| P78-1  | PY02297 | H2-Kd | RYNNNNTNI   | 4.61  | VTHSRYNNNNTNINVGQ*   | GTAACCCACTCTAGATATAATAATAAATAACACTAACATAGTAGGTAACCAAGTGA    |
| P78-2  | PY02297 | H2-Kd | MYNRMVEYI   | 10.75 | SIVMMYNNRMVEYIILL*   | TCAATAGTGATGATGATAATAAGATGGAAGTACGTAGCTAATCTGCTACTTTGA      |
| P78-3  | PY02297 | H2-Ld | LPNVNNNYNM  | 34.23 | GSTKLPNVNNNYNMOTAM   | GGTAGCACTAAGCTGCCCTAACGTGAATACTATAACATGCAACCGGCCATGTTGA     |
| P78-4  | PY02297 | H2-Ld | HPMNNNYNRM  | 46.38 | TSIPHPMNNNYNRMYPMT*  | ACATCTATCCCAACCCCTAGAACATGTATAATAAGATGTATCCCATGACTTGA       |
| P78-5  | PY02310 | H2-Kd | SYIYNGSI    | 4.75  | IGVISYIYNGSIVYONC*   | ATAGCGGTGATAAGCTACTACATAAACGGTAAATAGCATAGTGTATTTAGTACTGA    |
| P78-6  | PY02310 | H2-Kd | SYNYIYENI   | 9.59  | HTLASYNYIYENILEKI*   | CACACCTTAGCTAGCTATAACTACTACATAGAGAACATCTCTAGAGAAGATTGA      |
| P78-7  | PY02310 | H2-Kd | SYESSDSYI   | 13.58 | WPLTSYESSDSYISLSL*   | TGGCCACTGACTAGCTATGAGAGTAGTATAGTACATCTCTCCGTGAGCCTGTA       |
| P78-8  | PY02310 | H2-Kd | CYINNEKNI   | 31.65 | QCLECYINNEKNINCSG*   | CAATGCCTAGAGTGCTACATAAATAAGAGAAGAACATAAACTGCTCAGGGTGA       |
| P78-9  | PY02320 | H2-Kd | YYLYYKNII   | 10.27 | LKCHYLYYKNIIDILS*    | CTGAAATGCCATTACTACCTGTACTATAAGAACATAATAGATCTAATAAGTTGA      |
| P78-10 | PY02320 | H2-Kd | YYIKIKIOFI  | 11.16 | VCKRYIYIKIKIOFIREGM* | GTGTGTAACAGCTACTACATAAAGAAGATCCAGTTTCATAAAGGAGAGGGATGTGA    |
| P79-1  | PY02320 | H2-Kd | LYHTIYNPI   | 12.5  | VYTSLYHTIYNPINHTA*   | GTGTACACATCCCTGTACCAACCACTCTATAACCCCTATAACCCAGCACTGTTGA     |
| P79-2  | PY02320 | H2-Kd | IYLGIVTPL   | 25.27 | SVEVILYGIWTPLTCA*    | TCTGTAGAAGTACTTACCTAGGCATAGTGACCCCTCTGAGTACTTGGCCTTGA       |
| P79-3  | PY02320 | H2-Kd | KYANLEDNI   | 32.67 | LFNKYKANLEDNIKPEH*   | CTCTTTAATAAAAAGTACGCTAACCTAGAGGATAAACATAAAGCCTGAACACTGA     |
| P79-4  | PY02320 | H2-Kd | IYQICNPI    | 36.37 | HNQLIYQICNPIPIPKQ*   | CATAACCAAGCTAATCTACCAGATCTGAAGTACCCTATAAATCTCTAAGCAGTGA     |
| P79-5  | PY02320 | H2-Kd | KYIILIYNI   | 36.97 | SESVKYIILIYNIPVKQ*   | TCTGAAAGCGTGAAGTACATAATAATCTACCTGAACATAGTGCTCAAGGGCTGA      |
| P79-6  | PY02320 | H2-Ld | HPACSFPTL   | 39.13 | CQVVHPACSFPTLLTDG*   | TGTCAGGTAGTGCACCCCTGCTGAGTCTTCCCTACCCCTGCTCACTGACGAGTGA     |
| P79-7  | PY02325 | H2-Kd | KYHGNNTNI   | 4.39  | MQGGKYHGNNTNICLFR*   | ATGCAGGGCGGTGAAGTACCACGGTAACCTACACTAACATCTGCCCTTTTAAATGA    |
| P79-8  | PY02338 | H2-Kd | KYHVVLDKL   | 18.36 | DTNIKYHVVLDKLHHKM*   | GACACTAATAAAGTACGCGCTGGGTGCTAGATAGATGACCACTAAGATGTGA        |
| P79-9  | PY02348 | H2-Kd | FYFSYYYNL   | 6.11  | YARRFYFSYYYNLFADS*   | TACGCAGTAGATTCTACTTTAGCTACTACTTAACCTGTTTCTGCTGACTCCTGA      |
| P79-10 | PY02348 | H2-Kd | YYNLTVSL    | 6.26  | FAVAYYYNLTVSLFTP*    | TTCCGAGCTGCTACTACTATAACCTGACCGCTGAACCTGTTCTGACGCCGGGTGA     |
| P80-1  | PY02348 | H2-Kd | KFYKSWSSI   | 8.59  | KPVRKFYKSWSSIAFFD*   | AAACCCGTGAGAAGTTCTATAAGAGCTGGAGTAGCATAGCTTCTTTGACTGA        |
| P80-2  | PY02348 | H2-Kd | KYKIMNVI    | 9.16  | SYSAKYKIMNVIDIEKI*   | TCTTATAGTGTAAAGTATAAAGATAAGAACGCTGATAGAGATAGATAAGTA         |
| P80-3  | PY02348 | H2-Kd | SYKSTLKI    | 10.19 | TYQGSYKSTLKDITPD*    | ACGTATACAGGGTAGCTACGTGAAGAGCAAGCTGAGATACCACTCTGACTGACTA     |
| P80-4  | PY02348 | H2-Kd | GYAFVIFPI   | 15.81 | LDLGYAFVIFPIPRIY*    | ACCCTAGACCTAGGCTACGCCTTCGTGATCTTCCCTATCCCTAGGATCTACTGA      |
| P80-5  | PY02348 | H2-Kd | FYKSWSSII   | 20.25 | DDTNFYKSWSSIIHFSM*   | GATGACATAATTTTCTATAAGAGCTGATGAGTACATACCCATCTTATGATGTA       |
| P80-6  | PY02348 | H2-Kd | SYIIIRGSI   | 21.99 | DSIDSYIIIRGSIKNGK*   | GATAGCATAGATAGCTACATAATAAAGAGGATGACATAAAAAACCGGTAATGA       |
| P80-7  | PY02348 | H2-Kd | NWIINNANAI  | 36.62 | SYDVNWIINNANAIYSF*   | TCTTATGATGTAAGCTGGATAAATAACCGCTAACGACATAAATACTCTATTGTA      |
| P80-8  | PY02366 | H2-Kd | FYFSNEFNI   | 4.54  | IVNGFYFSNEFNIHAY*    | ATAGTGAAATGGCTTCTACTTTAGTAATGAGTTTAACATAAATCTACGCCTATTGA    |
| P80-9  | PY02366 | H2-Kd | IYMNNGHI    | 6.78  | IHTNIYMNNGHILGEC*    | ATACATACTAACATCTACATGAATAAATAACGGCCACATCTAGGTAGTGCTGA       |
| P80-10 | PY02366 | H2-Kd | KYTNSCSDI   | 11.83 | QQDTKYTNSCSDISFND*   | CAGCAGGACACTAAGTACACTAATAGCTGTAGCTGACATCTCAATTGACTGTA       |
| P81-1  | PY02366 | H2-Kd | HYNNGQMFL   | 17.93 | GPPAHYNNNGQMFLMCCS   | GGACCACCTGCTCACTATAATAACGGCCAGATGTTCTGCTAGTGTGCTGCTTGA      |
| P81-2  | PY02366 | H2-Kd | NYNPNNIL    | 22.86 | LCPKNYNPNNILVASI*    | CTTTCCTTAAGAAGTATAACCCCTAACATAAATAACCTAGTACTGCTTATTGTA      |
| P81-3  | PY02366 | H2-Kd | SAYNMNYI    | 43.7  | KSRTSAYNMNYIIOFPH*   | AAATCCCGGACTACGCGCTATAAACATGAACACTACATCCAGTTTCCCACACTGA     |
| P81-4  | PY02373 | H2-Kd | YFNTNHYDTI  | 6     | QEKGYFNTNHYDTIIVH*   | CAGGAAAAGGGATACACTAACCGACGTAGACACCCATAAATAGTCCAGCTTGA       |

|        |         |       |            |       |                     |                                                            |
|--------|---------|-------|------------|-------|---------------------|------------------------------------------------------------|
| P81-5  | PY02373 | H2-Kd | QYMHMTLII  | 8.91  | ANEGQYMHMTLIIILSK*  | GCTAATGAGGGGCAGTACATGCACATGACCCGTGATAATAATTCTGAGTAAGTGA    |
| P81-6  | PY02373 | H2-Kd | YYYKYLEIL  | 12.65 | YELSYYYKYLEILAEGS*  | TATGAACCTTTCATACTACTATAAGTACCTAGAGATCCCTAGCTGAGGGGCTCTTGA  |
| P81-7  | PY02373 | H2-Kd | YYTYFNFI   | 12.95 | SDEKYTYFNFIHSHS*    | AGTGATGAGAAGTACTACACCTACTTTAATAAAGTACCTACTCTACACGCGCTGATGA |
| P81-8  | PY02373 | H2-Kd | YYDDENTL   | 15.39 | SKRRYYDDENTLANLL*   | TCTAAGCGCAGCATACTACTATGATGATGAGAACCCCTAGCTAACCTGTTGTGTA    |
| P81-9  | PY02373 | H2-Kd | KYNINDNEI  | 18.19 | LLIYKYNINDNEIVCDT*  | CTGCTAATTTATAAGTATAACATAAAATGATAAATACATAGTGTGTGACTACTGTA   |
| P81-10 | PY02373 | H2-Kd | KYTNINNEI  | 21.14 | IGTGKTYNINEEIRMH*   | ATAGGTACTGGTAAGTACACATAAAGTACCAATAAGGAGATCCGCTAGTACTCTCGTA |
| P82-1  | PY02373 | H2-Kd | NFNFNVSFL  | 25.65 | FVMHNFNFNVSFLKHL*   | TTTGTGATGCATAAATACTTCTGTAAGTGTCTTCTGTAAGCATCTAGACTGA       |
| P82-2  | PY02373 | H2-Kd | SYNLNETI   | 38.27 | ACPLSFNFNLETRIOSH*  | GCGTGCCCCCTGAGCTTATAAACCCTGAATGAGACCATTAAGCAGAGCCACTGA     |
| P82-3  | PY02373 | H2-Kd | IYNFSTIL   | 38.44 | IRKDIYNFTSTILLTLK*  | ATAAGAAAAACATCTATAAACCCTACATAGCACCATCCTGTTGACATTAATATGA    |
| P82-4  | PY02376 | H2-Kd | CYEMYNFI   | 24.06 | CPLSCEYMFNFIHKQ*    | TGCCCCCTGCTGCTATGAGTACATGATAAACTTCACTCAATAAGCAGGAAGTGA     |
| P82-5  | PY02388 | H2-Kd | KYSDSKSTI  | 4.98  | LLWKKYSDSKSTIKGT*   | CTGCTGTGGAAGAAGTATAGTGATAGTAAGAGCACCATAAAGGGGACCTAAGTGA    |
| P82-6  | PY02388 | H2-Kd | MYSQIKCLI  | 31.8  | RDDSMYSQIKCLIVTPL*  | AGGGATGACTCTATGATAGCCAGATAAAGTGCCCTGATAGTGACACCCCTGTGA     |
| P82-7  | PY02388 | H2-Kd | YSQKTNLI   | 33.27 | SDATSYSQKTNLIAGL*   | TCTGATGCTACTAGCTATAGCCAGAAGACTAACCTGATCCTAGCCGGGCTGTGA     |
| P82-8  | PY02411 | H2-Kd | CYVYNKNII  | 13.76 | PTSGCYVYNKNIIAPT*   | CCGACCTCGGGCTGCTACGCTGATATAAAGAAGACATAAAGTCCGCCCTACATGA    |
| P82-9  | PY02411 | H2-Kd | FYNMNIKSI  | 21.78 | VISTFYNMNIKSIKCR*   | GTGATATCTACCTTCTATAACATGAACATAAAGAGCATAACTCGTAAGCGCTGA     |
| P82-10 | PY02411 | H2-Kd | SFMNDDSDSI | 25.23 | HSTASFNMNDDSDISRL*  | CATAGTACAGCTAGCTTCAATGAATAATGATGATAGCATCTCTAGGATGATATGA    |
| P83-1  | PY02411 | H2-Kd | VYKNKIEI   | 29.4  | ACDFVYNKNIEIYKYD*   | GCATGTGACTTCGTGTATAAAGAACATAATAGAGTACTATAAGCATAGTACTGA     |
| P83-2  | PY02411 | H2-Kd | ILINDINSI  | 32.66 | LLVAIYNLDINSIWHWS*  | CTACTAGTAGTATCTATAAACCCTAGACATAAATAGCATCTGGCAGCTGGTCATGA   |
| P83-3  | PY02442 | H2-Kd | KYFYDSNI   | 4.68  | EKAEEKYFYDSNIIOSH*  | GAGAAGGCTGAGAAGTACTACTTCTATGATAGTAACTAATTTCCGAGCGGTGA      |
| P83-4  | PY02442 | H2-Kd | YYFNKKLTI  | 5.89  | PDFVYFNKKLTIIECP*   | CCTGACTTTGTATACTACTTTAATAAGAAGCTGACCATAGAGGAGTGCCCATGA     |
| P83-5  | PY02442 | H2-Kd | IYNTYTNI   | 7.66  | PTIPIYNTYTNIQIVV*   | CCGACAATAACCAATCTATAACTGCACCTACACTAACATAGGAATAGTAGTGA      |
| P83-6  | PY02442 | H2-Kd | IYQNYNPI   | 7.93  | KVEDIYQNYNPIKCFP*   | AAGGTAGAAGACATCTACCAGAACTATAAACCCTACTGCTAATGTTCCCTGA       |
| P83-7  | PY02442 | H2-Kd | FYYNYDYVI  | 8.46  | LYKPFYYNYDYVIGNKA*  | CTCTATAAGCCCTTCTACTATAACTATGACTACGTGATAGGTAAATAAGGCGGTGA   |
| P83-8  | PY02442 | H2-Kd | YFYKNDYII  | 9.29  | SKQTYFYKNDYIIPKI*   | TCTAAGCAGACTTACTACTTTAAGGATAAECTACATAAATTTCCAAATAAGCTGA    |
| P83-9  | PY02442 | H2-Kd | KYFEYNMLSE | 10.57 | IPSEKYFEYNMLLESPE*  | ATCCCTTCTGAGAAGTACTTTGAGTATAACATGCTGCTAGAGTCTCCTGAGTGA     |
| P83-10 | PY02442 | H2-Kd | IYNGSVNI   | 10.98 | RLGAIYNGSVNIEDPP*   | CGCCTAGGCGCCACTACCTGACCGTGAACGTGAACATGACCTAGCCACTTTTGA     |
| P84-1  | PY02442 | H2-Kd | IYINKNHL   | 11.77 | YKINYNKNHL          | GCCATGTCTCAAATCTACATCTATAAAGCATAAACCCTAGGACCTGAAGACCTGA    |
| P84-2  | PY02442 | H2-Kd | IYINLNINI  | 14.64 | QKDIKYINLNINIYKYD*  | CAAAAGGACATAAAGTATAAACCCTGTACATAAATAACCTACTATAACTCTAAGTA   |
| P84-3  | PY02442 | H2-Kd | IYIKKYVTI  | 16.22 | SPEIYIKKYVTIVYGO*   | TCCCTGAGATAATCTACATAAAGAAGTACGTGACCATAGTGTACGGGCAGTGA      |
| P84-4  | PY02442 | H2-Kd | LYIANSFI   | 16.51 | PQDQNYLIANSFINKVA*  | CCCCAGGACCAAACTACATAATAGCTAATAGCTTCATAAATAAGTAGCATGA       |
| P84-5  | PY02442 | H2-Kd | LYACNKYTL  | 16.87 | HQQSLYACNKYTLNNS*   | CACCAGCAAAAGCCTGTACGCGCTATAAATAGTACACCCCTGAATAACTCTCCATGA  |
| P84-6  | PY02442 | H2-Kd | YYFYDSNII  | 18.66 | QSRAYFYDSNIIQLKEL*  | CAGAGCCGCGCATACTACTTCTATGATAGTAACATCTCCTGAGGAAGTGAAGTGA    |
| P84-7  | PY02442 | H2-Kd | IYNSKNTNI  | 21.69 | EDVSIYNSKNTNISPLA*  | GAAAGCAGTGAGCATCTATAACATAAGTAAGACTAACTAAGGCCCTTAGCCTGA     |
| P84-8  | PY02442 | H2-Kd | KYINYSDYV  | 23.43 | QAPKKYINYSDYVFCRC*  | CAGGCCCTCAAGAAGTACATAAATATAGTACTACGTGTTTGGCGGATGTTGA       |
| P84-9  | PY02442 | H2-Kd | IYKIDISIL  | 31.42 | LQTEYYKIDISILSKGH*  | CTACAAACTGAGTACTACTGTGAAGGACATAGCATCCTGTCTAAAGGCCACTGA     |
| P84-10 | PY02442 | H2-Kd | MYLINKFII  | 31.53 | LKEHMYLINKFIINPEL*  | CTGAAGGAGCAGATGTACCTGATAAATAAGTTTCATAAATAAATCCTGAGTGTGTA   |
| P85-1  | PY02442 | H2-Kd | SYTHADNNI  | 32.05 | RLFSSYTHADNNMMPPI*  | AGGCTATTCTCTAGCTACACCCAGCCTGATAAATAACATAATGATGCCACTTGA     |
| P85-2  | PY02442 | H2-Kd | EYFPNYIIL  | 32.94 | KNDSEYFPNYIILSIDV*  | AAGAATGATAGTGAGTACTTCCCTAECTACTACATCCTGAGTATAGTAGACTGA     |
| P85-3  | PY02442 | H2-Kd | IYFYKNDYI  | 39.78 | EPLRIYFYKNDYIYEG*   | GAGCCTCTGAGGATCTACTACTTTAAGGATAACTACATAGGTGAGTACCGGATGA    |
| P85-4  | PY02442 | H2-Kd | IYKIDISI   | 46.81 | LANCYIYKIDISIEIVP*  | TTAGCTAATTGCATCTACTACTGTAAAGACATAAGCATAGAGGTAAATACCCCTGA   |
| P85-5  | PY02460 | H2-Kd | MYIIVQNI   | 18.78 | IVFQMYIIVQNIIEVDC*  | ATAGTCTCCAGATGTACATAATCTACGTGCAGAACATAGAAGTAGACTGTTGA      |
| P85-6  | PY02476 | H2-Kd | TYMRYHSSV  | 6.17  | VGSGTYMRYHSSVVTGND  | GATGGTAGCCAAACCTACATGAGATACCATAGTACGCTGACGGGTGAATGACTGA    |
| P85-7  | PY02481 | H2-Kd | YYINMDSRL  | 3.82  | FQNYIYINMDSRLLESD*  | TTCCAAAATGTGTACTACATAAATAGTATAGTACTGCTAGAGAGTGAATTTGA      |
| P85-8  | PY02481 | H2-Kd | YLIDLNLPLV | 21.88 | CRHNRYLIDLNLPLV*    | GTGCTCATAATAGATACCTAGACATCCTGTAATAAAGTCCGCTTAGTCTCTGA      |
| P85-9  | PY02481 | H2-Ld | SPYLHLIL   | 49.08 | RWRKSPYLHLILFNWVG*  | AGGTGGAGAAAAAGCCCTTACCTGCACCTGATCCTGTTAACTGGGTAGGCTGA      |
| P85-10 | PY02590 | H2-Kd | KYIGESARI  | 21.78 | GSCWKYIGESARIFGPWY* | GGATCATGTTGGAAGTACATAGGTGAGAGCGCTGATTAAGTACGCCCTGTGACTGA   |
| P86-1  | PY02590 | H2-Ld | LPILNPLF   | 20.33 | RNSKLPLNPLFQVHL*    | CGTAAATCTAAACTGCCTATCTGTAACCCCTTCTGCTGCCAGTGCATCTTTGA      |
| P86-2  | PY02592 | H2-Kd | YSYILSIL   | 20.56 | QGVMSYSYILSILLKYE*  | CAAGGGGTGATGAGCTATAGCTACATCCTGAGCATCCTGCTGAAGTATGAGTGA     |
| P86-3  | PY02597 | H2-Kd | KYKGSYSEI  | 6.31  | EYFCKYKGSYSEIIPPE*  | GAGTATTCTGTAAAGTACGGTAAAGAGCTATAGTGAGATAATTTCCCCAGGAAGTA   |
| P86-4  | PY02597 | H2-Kd | YFYYTFLLL  | 37.18 | VDKIFYFYYTFLLLDYPR* | GTAGATAAAATATTCTACTTCTTACCTTCTGCTGCTAGATTATAAGAAATGA       |
| P86-5  | PY02606 | H2-Kd | NYIDMFCQI  | 5.26  | RVSNDYIDMFCQIIPNR*  | AGGGTGAGTGATAACTACATAGACATGTTCTGCGCAGATCCGCTAATCCTAGGTA    |
| P86-6  | PY02606 | H2-Kd | TYFPSDHEI  | 7.57  | NYPETTYFPSDHEIOVGT* | AATTATCCTGAACCTACTACCCCTAGTGAACATGAGATCCAAGTACGAGCCTGA     |
| P86-7  | PY02606 | H2-Kd | SYFKKSLI   | 11.59 | AASLSYFKKSLIYPPPP*  | GCTGCTAGCCTGAGCTACTTTTAAAGAAAGAGCCTGATCTTATCCTCCCTTGA      |
| P86-8  | PY02606 | H2-Kd | NYASQYTYI  | 21.04 | HOWLNYASQYTYISFG*   | CACCAGTGGTGAACCTACGCTAGCTACCAGACCTACATCTCCTTTGGGTCTTGA     |
| P86-9  | PY02606 | H2-Kd | FYVNRNPL   | 22.34 | SRRNFYVNRNPLNGTSL*  | TCCGCGTCGTAACCTTCTACGTGAATAGAAATAACCCCTCTAGGTACTAGCCTGTGA  |
| P86-10 | PY02606 | H2-Kd | FYSDISSL   | 26.68 | LEFFPYSDISSLIVIG*   | CTAGAGTTTCTCTTCTATAGTGACATAAGTAGCATCCTAGTAAATAGGCGGTGA     |
| P87-1  | PY02606 | H2-Kd | KYSKEVNIK  | 35.22 | QDQEKYSKEVNIKIIVLS* | CAGGATCAGGAGAAGTATAGTAAGGAGGTGAATAAGATAATAGTCTCTCGTGA      |
| P87-2  | PY02606 | H2-Kd | YVQGLSGNL  | 42.02 | DKNQYVQGLSGNLGAKS   | GATAAAGAACCCAGTACTACCAGGGCCTGAGCGGTAACTGCTGAGAGGACTTGA     |
| P87-3  | PY02606 | H2-Kd | NIYIFDNMI  | 42.84 | RGVKNYIFDNMIMPFLT*  | CGGGGCGTGAAGAACATACATCTTTGATAAATACATGATCCCTTTTCTAACCTGA    |
| P87-4  | PY02606 | H2-Kd | IYSLSIGYI  | 43.41 | TCDRIYSLIQYILIEA*   | ACATGTGATCGTATCTATAGCCTGAGCATACCTGATCATCTTGTAGAGGCAATGA    |
| P87-5  | PY02631 | H2-Kd | YYMNTPFKI  | 5.93  | SGPACYMNTPFKIYLIQ*  | TCCGGACCACTGCTGATACATGAACACCCCTTTAAGATCTACCTGCAAGCTCTGA    |
| P87-6  | PY02631 | H2-Kd | CYLLFNEII  | 6.84  | FHPRYLYLLFNEIIRAL*  | TTCCATCCTCGGTACTACCTGTTTAACTTTGAGATAAAGGAGCGCGCTGTGA       |
| P87-7  | PY02631 | H2-Kd | RYSNVHTLL  | 7.38  | CSAERYSNVHTLLVGLP*  | TGCTCTGCTGAAAGATATAGTAACGTGCACACCCCTGCTAGTAGGACTGCCATGA    |
| P87-8  | PY02631 | H2-Kd | SYICKNDML  | 23.42 | HMYRYSYICKNDMLTALK* | CACATGTATAGGAGCTACATCTGTAATAAGGACATGCTGACCGCTCGAAGTGA      |
| P87-9  | PY02638 | H2-Kd | YYYVPMVL   | 12.17 | MQQVYYYVPMVLSDSD*   | ATGCAGCAAGTCTACTACTGCTGATCCCTATGCTGCTTCTGTACACCTGA         |
| P87-10 | PY02638 | H2-Ld | IPMVLGYFY  | 17.48 | VPESIPMVLGYFYFOKIM* | GTCTCCTGAATCTATCCCTATGGTGCTAGGCTACTACTTCCAGAAAATAATGTA     |
| P88-1  | PY02638 | H2-Ld | NPMNVYVHF  | 48.78 | VGRKNPMNVYVHFQTKC*  | GTAGGACGTAAAAACCCCTAGCGCTAAGCTGTACCACTTCCAGACATCTAAGTGA    |
| P88-2  | PY02679 | H2-Kd | IYFYKANEL  | 12.02 | FELAIYFYKANELFNN*   | TTTGAGCTAGTATCTACTTTAAGTACGCTAATGAGCTGCTCTTAATAACTGA       |
| P88-3  | PY02679 | H2-Kd | NIYDIQYI   | 23.23 | VQDLNIYDIQYIIRAMQ*  | GTCCAAGACCTGAACATACATAGACTACCTCAGATAATAGGAGTGGGGTGA        |
| P88-4  | PY02679 | H2-Kd | KYANELQAL  | 27.63 | PIVKNYANELQALRILS*  | CCAATAGTGAATAAGTACGCTAATGAGCTGCAAGGCCCTGAGAATCCTGAGCTGA    |
| P88-5  | PY02679 | H2-Kd | IYIYVNSLI  | 32.94 | DFLFYIYIYVNSLIADN*  | GATTTTCTGTTCATCTACTACATAGTAATAATAGCTTAGCCGTAGATAATTGA      |
| P88-6  | PY02679 | H2-Kd | KYKINDII   | 36.57 | GSTNKYKINDIIDIIVTQ* | GGCTCCACTAATAAGTACACTGAGATAAAGTACATAAATAGTAACTACCTAGTA     |
| P88-7  | PY02679 | H2-Kd | IYDPNYETI  | 44.11 | HNTPIYDPNYETILRLK*  | CATAACTCTCGGATCTATGACCCCTAACTATGAGACCATCCTTCGCTGAAGTGA     |
| P88-8  | PY02679 | H2-Ld | FPINNYLRL  | 28.43 | KAVGFPINNYLRLGLFC*  | AAGGCCGTAGGCTTCCCTATACATAAACCCTGACACTGAGGAGGGGATCTGTTGA    |
| P88-9  | PY02683 | H2-Kd | KYLPLFSTL  | 3.64  | RLYAKYLPLFSTLAAQT*  | CGGTTATATGCTAAGTACCTGCCTCTGTTTAGCACCCCTAGCCGCTCAGACCTGA    |
| P88-10 | PY02683 | H2-Kd | HYINHINYI  | 3.72  | PDMTHYINHINYILERH*  | CTGATATGACACACTACATAAACCCACATAAACCCTACATCTCTAGAGAGGCATTGA  |
| P89-1  | PY02683 | H2-Kd | IYANTAYTL  | 12.49 | RRRPIYANTAYTLRTPA*  | CGTAGGCGACCAATCTACGCTAACACCCGCTACACCCCTAGGACCCCGCGTTGA     |
| P89-2  | PY02691 | H2-Kd | TFIRSCQVI  | 40.7  | NIGLTFIRSCQVISVPE*  | AATATAGGCTGACCTTCTATAAGAAGCTGCCAGTACATCTGTCCCTGAATGA       |
| P89-3  | PY02696 | H2-Kd | KYNASLETI  | 4.65  | SLLHKYNASLETIKEQN*  | AGCTTGATCCATAAGTATAACGCTAGCCTAGAGACCATAAAGGAGCAGAACTGA     |
| P89-4  | PY02696 | H2-Kd | YFVSFAFSQI | 22.58 | LTLFYFVSFAFSQIDARE* | CTGACATTTTTATCTTCTGAGCGCCTTTAGCCAGATAGATGCTAGAGAGTGA       |
| P89-5  | PY02715 | H2-Kd | YYVNIESTI  | 3.63  | NPSIYYVNIESTIKPGV*  | AATCCTAGCATATACTACGTGAACATAGAGAGCACCAATAAAGCCAGGCGCTTGA    |
| P89-6  | PY02715 | H2-Kd | KYFFDDNSI  | 4.57  | TPERKYFFDDNSITVAE*  | ACGCCGTGAGCGTAAGTACTTCTTTGATGATAATAGCATAAAGCATGCTGAGTGA    |
| P89-7  | PY02715 | H2-Kd | FYSYLLPFI  | 21.66 | GKWTFYSYLLPFIATOS*  | AAAGGGTGGACATCTTATAGCTACCTGCTGCTCTTTCATAGAACCCCACTCATGA    |
| P89-8  | PY02715 | H2-Kd | TINDIINYI  | 28.15 | MTVQTYTINDIYNINESQ* | ATGACCGTGCAGACCTAATGACATAATCTATAACATAAATGAGTCCGAGTGA       |
| P89-9  | PY02715 | H2-Kd | YYSKFSLYI  | 46.04 | DSNQYYSKFSLYIGARS*  | GACTCTAACCCAGTACTATAGTAAGTTTAGCCTGTACCATAGAGGCTAGCTTGA     |
| P89-10 | PY02722 | H2-Kd | SYLKSFTVL  | 5.35  | NMQKSYLKSFTVLAMFL*  | AACATGCAGAAAAAGCTACCTGAAGAGTAAGTTTACCCTAGCAATGTTTCTGTA     |
| P90-1  | PY02724 | H2-Ld | SPLKTHVL   | 36.75 | TVGTSPLKTHVLRLSLG*  | ACGGTAGGAACCTAGCCCTGGAAGATAAACCACGTGCTGAGGCTGTAGGCTGA      |
| P90-2  | PY02725 | H2-Kd | RYMNYSDAV  | 26.55 | VWLGRYMNYSDAVPGNI*  | GTGTGGCTAGGTAGATACATGAACATAGTAGACGCGGTGCCAGGTAACCATTGA     |
| P90-3  | PY02788 | H2-Kd | SYNNTRSRL  | 10.49 | REPHSYNNTRSRLSSTL*  | CGTGAACCTCATAGCTATAATAACACATAAGTAGTAGACTGAGCTCCACCTGTGA    |
| P90-4  | PY02788 | H2-Kd | NIYNDGNTI  | 18.07 | KKLENIYNDGNTILYFN*  | AAGAAATAGAAAACTACATAAATAGCGGTAAACACCATCTTATTTAATTAAGTA     |
| P90-5  | PY02788 | H2-Kd | FYNNQNINI  | 22.15 | LSALFYNNQNINIGAIV*  | CTGTGACGACTGTCTTATAATAACCAAGATAAATAACATAGGCGCCATGCTGTA     |
| P90-6  | PY02788 | H2-Kd | LYAQKNTI   | 26.95 | KQLPLYAQKNTIRVSC*   | AAGCAGCTGCCCTGTACGCCCAAGAGATAAACACCATCGGTGTGATGCTGTGA      |
| P90-7  | PY02799 | H2-Kd | KYQKNPATI  | 4.47  | RFAEKYQKNPATIPIGE*  | AGGTTTGCTGAGAAGTACCAGAAAGAACCTGCCACCATCCCTATAGGTTAGTGA     |
| P90-8  | PY02799 | H2-Kd | KWLDSDNSTI | 15.58 | KNSEKWLSDNSTIAQGT*  | AAAAATAGTGAGAAGTGCGCTGAGTGATAATAGCACAATACCTGAGGCTACATGA    |
| P90-9  | PY02799 | H2-Kd | KYWDTYLKL  | 31.63 | RFEIKYWDTYLKLALVK*  | CGCTTTGAAATAAAGTACTGGGACACCTACCTGAAGCTAGCGCTAGTGAAGTGA     |
| P90-10 | PY02799 | H2-Kd | IYPTTWEI   | 38.96 | MSFIYPTTWEIWSGGE*   | ATGAGCTTTTCAGATCTACTACCTACCACCTGGGAGATGAGTGAATGTAATGA      |
| P91-1  | PY02799 | H2-Kd | MYSECCDYL  | 41.49 | DSTSMYSECCDYLPSLF*  | GATAGTACTAGTATGTATAGTGAGTGCTGCTGACTACCTGCGTGTGCTGCTTTGA    |
| P91-2  | PY02799 | H2-Ld | LPIFSFCVFI | 39.68 | QHELLPIFSFCVFIHEVL* | CAGCATGAACGTGCTGCCTATCTTTAGCTGCTGCTGTGCTCATAGGCTCTTATGA    |
| P91-3  | PY02880 | H2-Kd | KYYSTNPEI  | 5.35  | AGAAAGYYSTNPEITGAS* | AGAAAGGAATTGAAGTACTATAGCACTAACCCCTAGAGATAAGGCGCGCTCTGA     |
| P91-4  | PY02880 | H2-Ld | CPSKNFFGM  | 44.31 | SKQICPSKNFFGMADYV*  | AGTAAACAGATTTGCCCTAGTAAGAACTTCTTCCGATGGCTGATTATTGTTGA      |
| P91-5  | PY02891 | H2-Kd | QYNWIFSTL  | 14.17 | AVGKQYNWIFSTLAGQL*  | CGCTGAGGTAACACAGTATAAAGTGGTTCATAAGCACCCCTAGCTGAGCAGCTCTGA  |

|         |         |       |            |       |                                                           |                                                           |
|---------|---------|-------|------------|-------|-----------------------------------------------------------|-----------------------------------------------------------|
| P91-6   | PY02891 | H2-Kd | YYGKNYPFL  | 18.26 | SGNMYYGKYNYPFLISDA*                                       | TCCGGTAATATGTACTACGGTAAGAACTACCCCTTCTGATGAAGTGACGCCTGA    |
| P91-7   | PY02891 | H2-Kd | SYTSDYFQLQ | 29.4  | GSPNMYTSDYFQLSSET*                                        | GGTAGTAACCCCTAGCTACACTAGTGACTACTTCCAGCTGTCTAGTGAACACCTGA  |
| P91-8   | PY02891 | H2-Kd | MYTYQKIYI  | 38.75 | TSSPMYTYQKIYIQIK*                                         | ACTAGCTCCCCAATGTACTACACCCAGAAGATCTACATAAATACAGATAAAGTGA   |
| P91-9   | PY02891 | H2-Ld | YPFCLCRTVF | 25.58 | VGIFYPFCLCRTVFRRDL*                                       | GTAGGAATTTTCTACCCCTTCTCGTGTAGAACCCTGTTTAGGCGGTGAACCTGTGA  |
| P91-10  | PY02892 | H2-Kd | KYMAVVIII  | 9.45  | LKKDKYMAVVIILLIL*                                         | CTGAAGAAAGATAAGTACATGGCCGTAGTGATAAATCCTCTTGATACTATGA      |
| P92-1   | PY02896 | H2-Kd | KYGTTRSNSL | 41.17 | KKTKLYGTTRSNSLSDG*                                        | AAGAAGACACTGAAGTACGGCACTAGAAGTAAATAGCATCTGTGTAGATGGATGA   |
| P92-2   | PY02896 | H2-Ld | YPGFNSYPM  | 17.09 | PMSMYPGFNSYPMTVGS                                         | CCAATGTCGATGTACCCCTGGCTTTAATAGCTACCCCTAGACCGCTAGGGTGCTGA  |
| P92-3   | PY02896 | H2-Ld | FPYVNNDLI  | 35.06 | PMQTFPYVNNDLISCMD*                                        | CCTATGCAGACTTTTCCCTTACGTGAATAATGACATCCTGCTTGTGCATGGAGCTGA |
| P92-4   | PY02899 | H2-Kd | YFFRNICKI  | 24.69 | HQDIYFFRNICKISSEE*                                        | CACCAGGATATTTACTTCTTTAGAAACATCTGTAAGATAAGCTCTGAAGAGTGA    |
| P92-5   | PY02920 | H2-Kd | FYVDITNLL  | 17.01 | QQLSFYDITNLLTSGN*                                         | CAACAGCTGAGTTTCTACGTAGACACCATAAACCTGCTGACGCTCAGGTAAGTGA   |
| P92-6   | PY02920 | H2-Kd | SYILYAVI   | 19.62 | YDIKSYILYAVIRSFQ*                                         | TATGATATAAAGAGCTACATAATCCTGTACGCCGTGATAAAGGCTCTTGTATTGA   |
| P92-7   | PY02920 | H2-Kd | GYIFNEPGI  | 20.21 | FRALGYIFNEPGIRVOI*                                        | TTTAGAGCTCTAGGCTACATCTTTAATGAGCGTGGCATAAAGAGTCCAATCTGA    |
| P92-8   | PY02920 | H2-Kd | FFLNSYSII  | 26.65 | RECCFFLNSYSIIILEG*                                        | CGTGAGTGTGCTCTTCTCCTGAATAGCTATAGCATAAATCCTAGAGGGGCTGA     |
| P92-9   | PY02920 | H2-Kd | NYSENVYNI  | 35.11 | EDYLNYSENVYNILGIA*                                        | GAGGACTACTTAAACTATAGTGAGAACGCTGTATAACATCCTAGGAATAGCATGA   |
| P92-10  | PY02920 | H2-Kd | SYSKNEYEL  | 41.12 | AKFQSYSKNEYELGVGD*                                        | GCTAAATTCAGAGCTATAGTAAGAATGAGTATGAGCTAGCGGTAGGTGAGCTGA    |
| P93-1   | PY02920 | H2-Kd | YYNKNEQI   | 47.31 | TDRDYNNKNEQIQRSL*                                         | ACTGACCGTGACTACTATAAATAAGAAATGAGCAGATCTCAGCACTGAACCTGA    |
| P93-2   | PY02920 | H2-Ld | YPQKNPCF   | 40.28 | SEEAFFQKNPCFVSVA*                                         | TCTGAGGAAGCGTCCCTCAGAGAATAAGCCTTGCTTCTGTGTAGGCGCTGA       |
| P93-3   | PY02920 | H2-Ld | YPHLLKFYL  | 48.96 | TFSRYPHLLKFYLHLQT*                                        | ACTTTTTCACGGTACCCCTCACCTGCTGAAGTCTTACCTGCACCTCCAGACTGA    |
| P93-4   | PY02926 | H2-Kd | YSANNANL   | 19.85 | PGCVYYSANNANLGSWG                                         | CCGGGGTGTGTGTACTATAGCGCTAAACAGCTAACCTGACCTCATGGGGGTGA     |
| P93-5   | PY02926 | H2-Kd | KYKNHLCIL  | 25.91 | EDLCKYKNHLCILAEWQ*                                        | GAAGATCTGTGTAAGTATAAGAACCACCTGTGCCTGATAGAAGCATGGCAGTGA    |
| P93-6   | PY02930 | H2-Kd | YVSHCDKL   | 36.04 | PQNLYYVSHCDKLPEGM*                                        | CCCCAAACTTGTACTACGTGAGCCACTGTGATAAGCTGCCTGGTGAGATGTGA     |
| P93-7   | PY02935 | H2-Kd | KYLKLHEYI  | 9.89  | SKHVYKLKLHEYIPTIR*                                        | TCTAAGCATGTGAAGTACCTGAAGCTGCATGAGTACATCGCTACATAAAGATGA    |
| P93-8   | PY02935 | H2-Kd | TYINYKTRL  | 10.52 | KMGSTYINYKTRLIHHT*                                        | AAGATGGGTAGTACCTACATAAACTATAAGACTAGACTGATTTCTGCACACCTGA   |
| P93-9   | PY02935 | H2-Kd | RYLKERNEI  | 19.3  | QSPSRYLKERNEIFPTP*                                        | CAGAGCCCTAGTAGATACCTGAAGGAGAGAATAAGATCTTCCCTAGCTGAGGTGA   |
| P93-10  | PY02936 | H2-Kd | KYISACRLI  | 9.07  | FSEAKYISACRLIVNPS*                                        | TTCTCTGAAGCTAAGTACATAAAGCGCTGTAGACTGATAGTGAATCCTAGGCTGA   |
| P94-1   | PY02936 | H2-Kd | GYIMDNAEI  | 39.61 | SSGAGYIMDNAEIEGVRV*                                       | AGTAGTGGAGCCGCTACATAAGTGGATAACGCTGAGATGAGCTGAGGAGGTGA     |
| P94-2   | PY02945 | H2-Kd | KYIKSIFPL  | 3.47  | YRPEKYIKSIFPLEPQ*                                         | TATAGGCCCTGAGAAGTACATAAAGAGCATCTTCCCTCTAGAACCCTGCCCTGA    |
| P94-3   | PY02945 | H2-Kd | SYNETRNTI  | 3.89  | QCLVSYNETRNTISQLG*                                        | CAGTGTTTAGTGAGCTATAAGTAGACTAGAAACACTGACCTACAGCTGAGGTGA    |
| P94-4   | PY02945 | H2-Kd | IYIPISFFYI | 5.48  | VECHYIPISFFYICTPL*                                        | GTAGAGTGTATAATCTACATCCCTAGCTTCTTCTACATCTGTACTCCACTGTGA    |
| P94-5   | PY02945 | H2-Kd | KYYNKFYPI  | 6.08  | ESSFKYYNKFYPIDDGG*                                        | GAGAGTAGTTTTAAGTACTATAAAGTACTTCCCTATAGATGAGTGGTGGCTGA     |
| P94-6   | PY02945 | H2-Kd | FYIEYNSIL  | 6.93  | SKKSFYIEYNSILTLIV*                                        | TCTAAGAAGAGTTTCTACATAGAGTATAAATAGCATCTGCTACCACTAGATGA     |
| P94-7   | PY02945 | H2-Kd | YYFYSWINI  | 7.57  | ATWRYYYFYSWINIEPSP*                                       | GCCACATGGCGTACTACTACTTTAGCTGGATAAAGCATAGAACCCTGCTCCTTGA   |
| P94-8   | PY02945 | H2-Kd | GYYSNPISI  | 8.1   | FTCKGYYSNPISISDR*                                         | TTTACCTGTAAAGGGCTACTATAGTAACCCCTATAAAGCATAACTTGTGATAGTGA  |
| P94-9   | PY02945 | H2-Kd | TYMCGRKYI  | 10.28 | NGFITYMYMCGRKYILSD*                                       | AACGGATTCTAAACCTACATGTGCGGTAGAAAAGTACATCCTGAGTAATGACTGA   |
| P94-10  | PY02945 | H2-Kd | SYSTDKSI   | 10.48 | TMPPSYYSTDKSIGHYG*                                        | ACTATGTATCCTAGCTACTATAGCACTGATAAGAGCATAGGCCACTATGGGTGA    |
| P95-1   | PY02945 | H2-Kd | LYLIKFNVI  | 12.27 | GVQQLYLIKFNVIKACQ*                                        | GGGTACAGCAACTGTACATAAAGCTGTTTAACTACATAAAGCGTCCACAGTGA     |
| P95-2   | PY02945 | H2-Kd | YYGCGSFL   | 12.99 | ENIEVYYGCGSFLGYNV*                                        | GAGAATAAGAAAGTGTACTACGGCTGCCAGAGCTTCCCTGTAGGCTATAACTGA    |
| P95-3   | PY02945 | H2-Kd | NYLENKSTL  | 15.38 | GKTLNLYLENKSTLAFAF*                                       | GGTAAGACACTGAACCTACCTAGAGAATAAAGAGCACCCCTAGCCCTTTGCCTCTGA |
| P95-4   | PY02945 | H2-Kd | SYRRRHNSM  | 16.43 | HDAASYRRRHNSMYLAV*                                        | CATGATGCGCGCTAGCTACTATAGAAGACATAAATAGCATGTATCTAGCAGCTGTGA |
| P95-5   | PY02945 | H2-Kd | YFNAFSSVL  | 17.71 | GMSIYFNAFSSLVSSL*                                         | GGGATGAGTATATACTTTAACGCTAACTTTAGTAGGCTGTGGAGTCCCTGTGA     |
| P95-6   | PY02945 | H2-Kd | MYTFISEL   | 22.44 | DILHMYTIFISELFKTD*                                        | GATATACTCCACATGTACACCTTCATCTTTAGTGAGCTGTTTAAAGACTGACCTGA  |
| P95-7   | PY02945 | H2-Kd | LYALMLNEI  | 24.3  | EGNALYALMLNEIKLTK*                                        | GAGGGTAAACGCCCTGTACGCCCTGATGCTGAATGAGATAAAGTGTACTAAGTGA   |
| P95-8   | PY02945 | H2-Kd | HYNTDNMI   | 27.88 | HLVFHYNTDNMIHQIT*                                         | CATTTAGTGTTCACCTATAACACTAATGATAACATAAATCCAGACGGGGGTGA     |
| P95-9   | PY02945 | H2-Kd | IYHGNTKSI  | 30.74 | ESIPYIHGNTKSIQAVY*                                        | GAATCTATCCCCATCTACCAACGGTAACACTAAGAGCATAGCAACAGGTCTTACTGA |
| P95-10  | PY02945 | H2-Kd | YRRRHNSMI  | 30.92 | GLLDYRRRHNSMICFLI*                                        | GGACTTCTAGACTACTATAAGAAGACATAAATAGCATGATCTGCTTTATCTATGA   |
| P96-1   | PY02945 | H2-Kd | NFINSHNFI  | 35.36 | ALRQNFINSFNIFILER*                                        | GCTTTGAGGCAGAACTTCATAAATAGCCATAACTTCCATCTCAGCAAGATTGTGA   |
| P96-2   | PY02945 | H2-Kd | TYIFGDFIL  | 35.43 | FESWITYIFGDFILHWEF*                                       | TTTGAATCTTGGACCTACATCTTCGGTGACTTCATCGCTGATTTGGGAGTCTCTGA  |
| P96-3   | PY02945 | H2-Kd | KXSNLNNDI  | 36.22 | VRFTKXSNLNNDIECTA*                                        | GTGAGGTTCACTAAGTATAGTAACCTGAATAATGACATAGAGTGTACCCGCTGA    |
| P96-4   | PY02945 | H2-Kd | KWHIRESTI  | 37.14 | CDSLKWHIRESTILDVA*                                        | TGTGATAGCCTGAAAGTGGCACCATAGAGAGAGCCACCTCATAGTACGGGTGTA    |
| P96-5   | PY02945 | H2-Kd | LYFENYNDL  | 37.92 | ILPVLVYFENYNDLCRYG*                                       | ATCCTTCCAGTGCTGTACTTTGAGAAGTATAAATGACCTGCCGCTGTTACGGCTGA  |
| P96-6   | PY02945 | H2-Kd | SONKNFPQI  | 38.42 | TQSEQKNFNFPQIDIEH*                                        | ACCCAGAGTGAGAGCCAGAAATAAGAACTTCCCTCAGATAGATATAGAGAATTGA   |
| P96-7   | PY02945 | H2-Kd | IYKKNENYI  | 39.84 | EDAMINYKKNENYINLEK*                                       | GAGGACGCTATGATCTATAAAGGAGAATAAATACATACAAACGGTGTAGACTGA    |
| P96-8   | PY02945 | H2-Kd | YKKNRSNEL  | 43.89 | YPHMYKKNRSNELFDEK*                                        | TACCACACATGTACTATAAAGTATAGAAATGAGCTGTTTATGAGAAAGTGA       |
| P96-9   | PY02945 | H2-Kd | NYLNHRHTVL | 44.1  | HELNSYLNHRHTVLQSLP*                                       | CATGAACCTCTCTAACTACCTGAATAGACACACCGTGCTGCAGTCACTCCCTGA    |
| P96-10  | PY02945 | H2-Kd | SEMNHICKI  | 49.75 | NDERSEMNHICKILVRS*                                        | AATGATGAAAGGAGTGAGATGAACACACATCTGTGAAGATAATTTAGATCTTGA    |
| P97-1   | PY02945 | H2-Kd | HAVPMYTFI  | 49.77 | GGCACAGGCACACACGCGTGCCATGTACACCTTCATCTGACATGTGAAGGTAGATGA |                                                           |
| P97-2   | PY02945 | H2-Ld | LIPISSFYNF | 14.24 | VFMVLPISSFYNFNMGL*                                        | GTCTTCATGGTTCCTGCCTATAAGTAGCTTCTATAAATCTTAACTAGGCTGTGTA   |
| P97-3   | PY03020 | H2-Kd | IYIKRASHL  | 10.67 | MTRTIYIKRASHLDIAG*                                        | ATGACCCGACCAATCTACATAAAGAGAGCTAGCCACCTAGACTAGACTGAGCTGA   |
| P97-4   | PY03020 | H2-Kd | FYVAISVFI  | 15.77 | SDEGFYVAISVFIIVAVK*                                       | AGTGATGAAGGATCTACGTAGCCATAAGCGGTGTTCTAGTAGGACAGTGAAGTGA   |
| P97-5   | PY03020 | H2-Kd | FYVQIKDKI  | 23.93 | HALSFYVQIKDKIIVAIT*                                       | GACGCCCTCTCATTCTATAACCAAGTAAAGAGATAAGATAGTAGGACCAATTTGA   |
| P97-6   | PY03020 | H2-Kd | FYLIKQNSKI | 28.98 | SESDFYLIKQNSKISGF*                                        | TCTGAGAGTGACTTCTACCTGAAGCAGAATAGTAAGATAAATCTCCGGGTCTCTGA  |
| P97-7   | PY03020 | H2-Kd | KYQKDDLI   | 39.2  | GDPLKYQKDDLIHNSM*                                         | GGTGATCCCATGAAGTACTACCAGAAGGATGACCTGATCCATTAATCTTGTGA     |
| P97-8   | PY03025 | H2-Ld | SPYENGVYF  | 14.19 | ASKQSPYENGVYFTREV*                                        | GCTAGTAAACAGAGCCCTTATGAGAAGCGCGTGTACTTCACTAGAGAAGGTGTA    |
| P97-9   | PY03038 | H2-Kd | IYNFNTEYE  | 8.22  | LDILYFNTEYIELSGS*                                         | CTGATATCCTAATCTATAAATCTTAAACACCTATGAGATGCTTCCCGCTCCTGA    |
| P97-10  | PY03049 | H2-Kd | FYFKWPYFI  | 5.24  | AEQHIFYFKWPYFIVLVT*                                       | GCTGAACAGCATTTTCACTTTAAGTGCCCTTACTTCTAGTTTGTGCTGACATGA    |
| P98-1   | PY03049 | H2-Kd | IYIYYESCI  | 21.85 | PEHFYIYIYESCIKVLK*                                        | CCTGAACATTTCACTATACATCTACTATGAGAGCTGATAGTGAAGCTGAGATGA    |
| P98-2   | PY03105 | H2-Kd | FYQCVKLAL  | 24.89 | PITSFYQCVKLALKENL*                                        | CCTATAAAGTACTTCTACCAAGTGCGTGAAGCTGACCTGAAAGGACCACTGTGA    |
| P98-3   | PY03114 | H2-Kd | FYNYTFSII  | 4.64  | LEIHFYNYTFSIITDIA*                                        | CTAGAAATTCACCTTCTATAACTACACCTTTAGCATATAAAGTACGACCTGCTGA   |
| P98-4   | PY03114 | H2-Kd | IYIHDYFII  | 18.76 | TFYMIYIHDYFIIFIRL*                                        | GTAACACCCATGATCTACATCCATGACTACTTCTCATAGAAAGAGAGGTTGTGA    |
| P98-5   | PY03114 | H2-Kd | IYCTILSII  | 35.26 | TFSWIYCTILSIYMLT*                                         | ACITTTCTCATGGATCTACTGCACCATCCTGAGCATAACTACCTAATGCTTTGA    |
| P98-6   | PY03114 | H2-Kd | SYNSFPLFL  | 40.66 | AHILSYNSFPLFLNLMK*                                        | GCCACATCCTGAGCTATAAAGCTTCCCTCTGTTCTGCTGAACATGACTAAGTGA    |
| P98-7   | PY03114 | H2-Kd | AFYNYTFSI  | 45.07 | FEFSAFYNYTFSISNFR*                                        | TTTGAATCTCGGCCCTTCTATAAATCAACCTTTAGCATCTTACCTATCTTCCGTGA  |
| P98-8   | PY03131 | H2-Kd | IYMSSTHTL  | 2.86  | AETQIYMSSTHTLKLCLN*                                       | GCTGAGACACAAATCTACATGAGTAGACCCCAACCCCTGAAGTGTCTGAAGCTGA   |
| P98-9   | PY03131 | H2-Kd | RYYKSKFHL  | 9.37  | QIDRRYRYKSKFHLNDLI*                                       | CAGATAGATAGGAGATACTATAAGAGTAAAGTTCCACCTGAATGTATGATCTGA    |
| P98-10  | PY03131 | H2-Kd | MYLDMNGII  | 15.05 | HIYDMYLDMNGIHKDHK*                                        | CATATCTATGATATGTACCTAGACATGAACGGGCATAAATAAGAGTATCATAGTGA  |
| P99-1   | PY03131 | H2-Kd | MYNNNYPPL  | 20.38 | PAISNNYNNYPPLLALS*                                        | CCCGCTATAAGTAACCTATAAATAAATCACTCCCTCCTGCTGAGCTCTGAGTTGA   |
| P99-2   | PY03131 | H2-Kd | YYAPLSSDL  | 30.02 | TSNEYAPLSSDLOEPL*                                         | ACTAGTAATGAGTACTACGCCCTCTGAGTAGTGACCTGCAAGGACCCCTTTGA     |
| P99-3   | PY03131 | H2-Kd | KYIEGLAWV  | 43.11 | MYPSKYIEGLAWVAQVE*                                        | ATGTACCCTAGTAAGTACATAGAGGGCCTAGCTGGCTGACGACAGGATAGTGA     |
| P99-4   | PY03131 | H2-Kd | LYQKVLPLV  | 48.67 | YSETLYQKVLPLVNFYA*                                        | TATAGTGAACCCCTGTACCAGAAAGTGCTGCCTGTGCTGAACCTCTACGCTTGA    |
| P99-5   | PY03140 | H2-Kd | FYKNNKLEI  | 44.36 | SRLOFYKNNKLEIYKLE*                                        | AGTAGACTACAATTTCTATAAGAATAAATAGCTAGAGATCTATAAGCTAGAGTGA   |
| P99-6   | PY03140 | H2-Ld | VPLYLHDFP  | 42.99 | SRKEVYPLYLHDFPRLQ*                                        | TCCGTAAGGAGGTGCGCTTACCTGCATGACTTCCCTTCCGCCAGCTAGGTTGA     |
| P99-7   | PY03153 | H2-Ld | IPSPNSYFM  | 14.39 | VWNHIPSNSYFMMVSL*                                         | GTGTGGAATACATCCCTAGCCCTAATAGCTACTTATGAAGTGTGAGCCCTGTA     |
| P99-8   | PY03155 | H2-Kd | LYLVNKSEI  | 3.32  | FSIKYLLVNVKSEIQQRK*                                       | TTTAGCATAAAAGTACTACCTGAACGTGAAGAGTACTGACGAGAGAGCAAAATGA   |
| P99-9   | PY03155 | H2-Kd | KYFAKENSII | 4.13  | FVKYKYFAKENSIAIQK*                                        | TTGCTGAAAGTGAAGTACTTGCCTAAGGAGAAATAGCATAGCCATTCAGATGTGA   |
| P99-10  | PY03155 | H2-Kd | KYKRNLFII  | 5.79  | VLFPKYKRNLFICGPD*                                         | GTACTGCCCTTTAAGTACTATAGAAATAACCTGTTTCACTCTGCGGAGCTGACTGA  |
| P100-1  | PY03155 | H2-Kd | KYIYAFCNL  | 7.03  | ESPKYIYAFCNLGGEEK*                                        | GAGAGCCCTAAGAAGTACATCTACGCCCTTCTGTAACCTAGGGGGTGAAAGTGA    |
| P100-2  | PY03155 | H2-Kd | FYLRNLNSFL | 7.62  | SHHIFYLRNLNSFLGCPY*                                       | TCTCACCACTCTTCTACCTGAGACTGAATAGCTTCTCAGGATGCCGCTTATGA     |
| P100-3  | PY03155 | H2-Kd | LYIENYNIL  | 10.41 | SILELYIENYNILNSLP*                                        | TCTATCTAGAGCTGTACATAGAGAATAAATCACTGAACTCTGCTGCTTGA        |
| P100-4  | PY03155 | H2-Kd | NYNCSLYSI  | 12.45 | DLDTNYNCSLYSIWMHE*                                        | GACCTAGATACCTAACTACTGTAATAGCCTGTATAGACTCTGGATGATGAGTGA    |
| P100-5  | PY03155 | H2-Kd | VYNNGVYNI  | 13.27 | VKGVVYNNGVYNICGLE*                                        | GTGAAAGGTGTAGTGATATAAATACGGCGTGATATAACATCTGTGGTGTAGAATTGA |
| P100-6  | PY03155 | H2-Kd | FYNNHLDGI  | 16.37 | PGGLFYNNHLDGICLPV*                                        | CCTGGCGGCCCTTCTATAAACCATAACCTGAACGGCATCTGCTTCCCGCTGTGA    |
| P100-7  | PY03155 | H2-Kd | YNNLNFILF  | 16.73 | WWVEYNNLNFILFVACY*                                        | TGGTGGGTAGAATACTATAGAAATAACCTGTTTCACTGACGGGCTGTGCTACTGA   |
| P100-8  | PY03155 | H2-Kd | YVVCFCDYI  | 16.89 | LSLRYVVCFCDYIVGKS*                                        | CTGAGTCTGAGATACTACGTGTGCTTCTGTGACTACATAGTAGGTAATCCTGTA    |
| P100-9  | PY03155 | H2-Kd | KYIPEDNLI  | 18    | LLLPKYIPEDNLIPLP*                                         | CTGCTACTGCCATAAGTACATCTGATGAGAAATACCTGACCCCATGCTCTGTGA    |
| P100-10 | PY03155 | H2-Kd | SFORNMTNI  | 20.21 | VDPPSFORNMTNINWNP*                                        | GTAGATCCCCCTAGCTTCCAGAGAAACATGACTAACATCTGGAACCCACCCCTGA   |
| P101-1  | PY03155 | H2-Kd | RYGCSYNFL  | 23.49 | PESLRYGCSYNFLDYLA*                                        | CCTGAATCCCTGAGATACGGCTGTAGCTATAACTTCTAGATTACCTAGCTTGA     |
| P101-2  | PY03155 | H2-Kd | YYFKNVTF   | 28.22 | RATLYYFKNVTFALMT*                                         | AGAGCAACACTGTACTACTTTAAGAACGTGACCTTCTGCTGCACTTAAGTACTGA   |
| P101-3  | PY03155 | H2-Kd | KYDYSQKSI  | 29.58 | DRKMKYDYSQKSIPLCM*                                        | GACCGTAAGATGAAGTATGACTATAGTAAGCAGAGCATCCCCCTTTGATAGTGA    |
| P101-4  | PY03155 | H2-Kd | NIYPIKNAL  | 30.76 | PHQFNYPPIKNALPDFC*                                        | CCCCATGCTTTAACTACATGACCTATAAAGAACGCCCTACAGGACTTTTGTGTA    |
| P101-5  | PY03155 | H2-Kd | SLRYTYSHI  | 37.38 | KVKFSLRYTYSHILVDV*                                        | AAAGTGAAGTTTAGCCTGTATAGAACTATAGCCACATCCTAGTAGATGCTGTA     |
| P101-6  | PY03155 | H2-Kd | NYNFVLDEI  | 38.49 | TVLANYNFVLDEIQLPA*                                        | ACGGTGTAGCTTAACCTATAACTCTGCTGCTAGATGAGATCCGCTCCCGCGCTGA   |

|         |         |       |            |       |                     |                                                              |
|---------|---------|-------|------------|-------|---------------------|--------------------------------------------------------------|
| P101-7  | PY03155 | H2-Kd | KMIDNINSL  | 42.25 | VSLEK MIDNINSLQHLT* | GTGAGTCTAGAGAAGATGATAGATAACATAAATAGCCTGCAGCACCTAACATGA       |
| P101-8  | PY03155 | H2-Kd | LYGLYLSLSI | 46.42 | ATSGLYGLYLSISIVHVE* | GCCACATCCGGTCTGTACGGCCTGTACCTGAGTAGATAGTCCATGTAGAAATGA       |
| P101-9  | PY03155 | H2-Ld | IPKINALIF  | 23.17 | AKWQIPKINALIFSLGR*  | GCTAAATGGCAGATCCCTATAAAGAACGCCCTGATCTTCTCTAGTAGAGTGA         |
| P101-10 | PY03155 | H2-Ld | LPINNINYNF | 28.89 | DGPSLPINNINYNFRNEG* | GACGGACCTTCACTGCCTATAAATAAATACTATACTCCGTATGAAGGATGA          |
| P102-1  | PY03168 | H2-Kd | SYVPSAEQI  | 7.47  | EIDFSYVPSAEQIGLSE*  | GAATAGACTTTAGCTACGTGCCTAGCGCTGAGCAGATAGCGGCTGAGTGAGTA        |
| P102-2  | PY03187 | H2-Kd | FYNNDLSNL  | 10.55 | SATFFYNNDLSNLAIWD*  | CTGTGCGACTTTCTTCTATAATAATGACCTGAGTAACCTAGGCATCTGGGACTGA      |
| P102-3  | PY03187 | H2-Kd | YVMREESKI  | 23.58 | LEQRVYVMREESKIPTAP* | CTAGAGCAAAGGGTGTACATGAGAGAGGAGAGTAGAATGCCCTACTGCCCTTGA       |
| P102-4  | PY03187 | H2-Kd | TYNRSKLLI  | 25.6  | AVKETYLNSKLLIKLNR*  | GCCGTGAAGGAGAGACCTACCTGAATAGTAGAACCTGTGAATAATTAAGTGGTA       |
| P102-5  | PY03187 | H2-Kd | QSQFFPIPV  | 26.13 | KSFNSQFFPIPVIKFYA*  | AAATCATTTAATAGCCAGTTCCTCTTCATCCCTGTGATAAAGTTTATGCCTGA        |
| P102-6  | PY03187 | H2-Kd | KQLTSHAQI  | 37.1  | VKAAKQLTSHAQILKRG*  | GTGAAGGCTGTCTAAGCAGCTGACTAGCCAGCCAGAGCTTGTGAAGAGGATGA        |
| P102-7  | PY03187 | H2-Ld | SPNPMIDIF  | 31.18 | WKNASPNPMIDIFHVEQ*  | TGGAATAATGCCTAGCCCTAACCCCTATGATAGACATCTTCCACGTAGAGCAGTGA     |
| P102-8  | PY03214 | H2-Kd | SYKEGHTYI  | 7.72  | KESDSYKEGHTYIPCGS*  | AAAGAAAGTGATAGCTATAAGGAGGGCCACACCTACATCCGCTGCGGCTCCTGA       |
| P102-9  | PY03214 | H2-Kd | AYIKWARFI  | 25.26 | SSSTAYIKWARFIVLQD*  | TCTAGTAGTACCGCCTACATAAAGTGGGCTAGATTCTAGTGCTCCAAGACTGA        |
| P102-10 | PY03214 | H2-Kd | YYYSEYFSV  | 29.26 | DAGNYYYSEYFSVSVESN* | GACGCCGGTAACCTACTACTATAGTGAGTACTTTAGCCTAGTAGAGCTAATTGA       |
| P103-1  | PY03215 | H2-Kd | AYINNVTNL  | 6.04  | DLTIAYINNVTNLHLRF*  | GACCTAACAAATAGCCTACATAAATAACGTGACTAACCTGCACCTGTTTCGGTGA      |
| P103-2  | PY03223 | H2-Kd | HYFSILFHI  | 6.48  | VGTRHYFSILFHIQGG*   | GTAGGTACTAGACACTACTTTAGCATCCTGTTCCACATCCAGGGGGGGTGGTGA       |
| P103-3  | PY03223 | H2-Kd | FYFGRSLEI  | 14.46 | SVELFHYFGRSLEIPARN* | TCCGTAGAAGCTGTTCTACATAGGTAGAAGCTTACATAGATCCCGCAGTAACCTGA     |
| P103-4  | PY03223 | H2-Ld | PLPVSNGTF  | 38.46 | TCVHLPLVSGNTFLTDN*  | ACTTGTGTCCACCTGCCTCTAGTGAGCGGTAACACCTTCTCACTGATAATTGA        |
| P103-5  | PY03237 | H2-Kd | LYSPTVKSI  | 8.95  | LAKCYYSPTVKSIQDC*   | CTAGCTAAATGCTACTATAGCCCTACCGTGAAGAGCATGAAGCAGGACTGCTGA       |
| P103-6  | PY03237 | H2-Kd | QYYYSLFFI  | 13.02 | TIEGQYYYSLFFIIPGPY* | ACCATAGAGGGGCAGTACTACTATAGCCTGTTCTTCATCCCTGTGCCTATTGA        |
| P103-7  | PY03237 | H2-Kd | KFMWNYQMI  | 14.68 | QFMAKFMWNYQMIQCNL   | CAGTTTATGGCTAAGTTCATGTGGAACACCATGATCCAGTGTAAATTTGTGA         |
| P103-8  | PY03237 | H2-Kd | YYYSLFFIL  | 15.97 | CHTRYYSYLFFILAMKS*  | GTGCACACTAGATACTACTATAGCCTGTTCTTCATCCTAGCTAGATGAAGAGCTGA     |
| P103-9  | PY03237 | H2-Kd | NYGNNIYI   | 24.92 | SSILNYGNNIYIVGGMG*  | AGTTCAATTTGAACTACGGTAATAACATCTACTACATAGTAGGAATGGGATGA        |
| P103-10 | PY03237 | H2-Kd | YFFPNNYGI  | 26.63 | PQQSYFFPNNYGITLRF*  | CCCCAGCAGTCACTACTTCTCCCTAATAACATACCGCCTAGCCTGCGCTTTTGA       |
| P104-1  | PY03237 | H2-Kd | NYIEYDFHI  | 38.39 | QDDVNIEYDFHIDRSE*   | CAGGATGACGTGAACATACATAGAGTATGACTTCCACATAGATCGTTCTGAATGA      |
| P104-2  | PY03237 | H2-Kd | KEYFYDSYI  | 44.21 | TCVSKYEYFYDSYIDTP*  | ACGTGTGTGCTAAGGAGTACTTCTATGATAGCTACATAGATACCCCTATTGA         |
| P104-3  | PY03243 | H2-Kd | FYMSDILPV  | 41.19 | ISLGFYMSDILPVQSPH*  | ATATCGTTAGGATTCTACATGAGTGACATCGCTGCCTGTGCGAGTACCACCATTTGA    |
| P104-4  | PY03255 | H2-Kd | RYFEFVNSI  | 5.09  | VELRRYFEFVNSIKLTA*  | GTAGAGCTCCGTAGATACTATGAGTTGCGTAATGAGCTAAGCAATTAACCCGCTGA     |
| P104-5  | PY03255 | H2-Kd | KYLHLYSRL  | 9.15  | FIOQTYLHLYSRLSSNT*  | TTCATCCAGACTAAGTACCTGCACCTGTATAGTAGACTGAGCTCTAATACGTGA       |
| P104-6  | PY03255 | H2-Kd | LYNSINNPI  | 12.99 | GHIPLYNINNPIMEFC*   | GGCCACATTCGCGTGTATAATAGCATAAATAACCCCTATAATGGAGGTTCTGCTGA     |
| P104-7  | PY03255 | H2-Kd | YYSEFVNSI  | 13.83 | PIVGYYSEFVNSIIPMH*  | CCAATAGTAGGTTACTATGAGTTGCTGAAATAGCATATATCCCTATGATAAGTGA      |
| P104-8  | PY03255 | H2-Kd | FQYNPYTYI  | 20.88 | ISKGFQYNPYTYIPISE*  | ATTTCTAAGGGTTTCCAGTATAACCCCTACACCTACATCCCTATAAGCGGGTGA       |
| P104-9  | PY03255 | H2-Kd | NYNENFDSL  | 29.81 | SHSFNYNENFDSLDPY*   | AGTCACTCCTTTAACTATAATGAGAATCTTTGATAGCTAGACCTCCGCTACTGA       |
| P104-10 | PY03255 | H2-Kd | LYCNDIYTI  | 37.11 | KDLLLYCNDIYTIKNC*   | AAGGATCTTCTGCTGTACTGTAATGACATCTACACCATCCGTAATAATGCTGA        |
| P105-1  | PY03255 | H2-Kd | YQLKSLNEI  | 45.86 | AELYYYQLKSLNEISELK* | GCTGAGCTGTACTACCAGCTGAAGAGCCTGAATGAGATCTCTGAAGCTGAAGTGA      |
| P105-2  | PY03255 | H2-Kd | KYKFDISKL  | 48.03 | LLENKYKFDISKLFSKN*  | CTCCTAGAGAATAAGTATAAGTTTGACATAAAGTACGAGTGTCTTCTAAACACTGA     |
| P105-3  | PY03267 | H2-Kd | SONNLFHSI  | 17.88 | PNHDSQNNLFFHSIEHAW* | CCTAACCATGATAGCCAGAATAACCTGTTCCTAGCATGAACACCGAGTATGA         |
| P105-4  | PY03267 | H2-Kd | KYIKNVQKV  | 20.17 | DHEIKYIKNVQKVQYV*   | GACCATGAGATAAAGTACATAAAGAACGTCGACAGAAGGTGAAGGCTATGTGTGA      |
| P105-5  | PY03267 | H2-Kd | QYIADQLNI  | 44.71 | LVLQYIADQLNITQCA*   | CTAGTTCTCCCCAGTACATAGCTGACCGCTGAACATAAECTAATGTGCGCTGA        |
| P105-6  | PY03269 | H2-Kd | SYICCNLSAL | 5.79  | CVSVSYICCNLSALVLNY* | TGCGTCTCTGTGAGCTACATCTGCTGTAATAGCCGCGCTAGCTGCAACTACTGA       |
| P105-7  | PY03269 | H2-Kd | HYQMMINNI  | 6.22  | WSEFHYQMMINNISQLQ*  | TGGAGTGAGTTCCACTACCAGATGATGATAAATAACATCTCTCACTCGAGTGA        |
| P105-8  | PY03269 | H2-Kd | NYLTMNSLI  | 8.4   | RPLRNYLTMNSLIRLNR*  | CGGCCACTGAGGAACCTACCTGACCATGAATAGCCTGATAAGACTGAGACACTGA      |
| P105-9  | PY03269 | H2-Kd | FYNYFTSTL  | 9.23  | RPLKFYNYFTSLTGMTK*  | AGACCCCTAAAGTTCTATAACTACTTCTACTAGCACCCTGAGGAGTACATAAGTGA     |
| P105-10 | PY03269 | H2-Kd | NYFNNSMNI  | 9.98  | FLQVNYFNNSMNIPLSH*  | TTTCTGCAAGTGAACCTATTTAATAGTAACTGAACATCCCCCTGAGCCATTGA        |
| P106-1  | PY03269 | H2-Kd | YYIKNNFDI  | 10.47 | GFVHYIKNNFDIKDVIH*  | GGCTTTGTGCACACTACATACATAAGAAATAAATTTGACATAAAGGATGTCCACTGA    |
| P106-2  | PY03269 | H2-Kd | IYMMNDTQL  | 15.31 | SHKLYYMMNDTQLMKLSL* | AGTCATAAGCTAATCTACATGAATGACACCATGCAGCTGAAAAAAGTTTGTGA        |
| P106-3  | PY03269 | H2-Kd | QYDANNKFI  | 19.31 | KLDFQYDANNKFIGMSR*  | AAACTAGACTTCCAGTACTACGCTAATAATAAGTTCTATAGGAATGTGTAGATGA      |
| P106-4  | PY03269 | H2-Kd | IQYNTTYSI  | 22.57 | VRytiQYNTTYSITQIF*  | GTGCGCTATACCATCCAGTATAACCAACCCACTATAGCATACCAACCGATTGTGTGA    |
| P106-5  | PY03269 | H2-Kd | YYHTNPNDI  | 30.28 | KVVAYYYHTNPNDILDG*  | AAAGTAGTAGCATACTACCACATGAATAACCCCTGACATCTTGAAGTCTAGGCTGA     |
| P106-6  | PY03269 | H2-Kd | HYFFKLYLI  | 37.34 | VGRRHYFFKLYLIYLHL*  | GTAGGTAGGTTTCACTACTTCTTTAAGCTGATCTACATAGTGCTTCATCTGTGA       |
| P106-7  | PY03269 | H2-Ld | IPIKNYNLY  | 11.38 | IGAWIPIKNYNLYLCKTA* | ATAGGTGCTTGGATCCCTATAAAGAACTACTATAACCTGTGTAAGACCCGCTGA       |
| P106-8  | PY03280 | H2-Kd | KYNSSQTVI  | 36.18 | DVFTKYNSSQTVINIDW*  | GACGTGTTTACTAAGTATAATGAGCCAGACCATAGTGAATATAGACTGGTGA         |
| P106-9  | PY03292 | H2-Kd | IYNEVLTAI  | 11.87 | GRILYIYNEVLTAIHLV*  | GGTAGGATCTAATCTATAATGAGGTGCTGACCGCCCTAGCATAGTATAGTATGA       |
| P106-10 | PY03325 | H2-Kd | SYFONIKDI  | 18.61 | VSLQSYFONIKDISLDA*  | GTGAGCCTGCAGAGCTACTTCCAGAACATAAAGGACATCTCTACTAGATGCATGA      |
| P107-1  | PY03329 | H2-Kd | KYNKTKDEL  | 41.05 | SPTS KYNKTKDELPIGY* | TCACCTACCTCTAAGTATAATAAGACTAAGGATGAGCTGCCCATAGGCTATTGA       |
| P107-2  | PY03350 | H2-Kd | TYYSYFSHI  | 3.28  | QLKATYYYSYFSHIHWEV* | CAGCTGAAGGCGAACCTACTACTAGCTACTTTCAGCCACCTACCTGGGAGGGTGA      |
| P107-3  | PY03350 | H2-Kd | YTYNNNFPL  | 9.15  | HVQDYTYNNNFPLAASP*  | CATGTGCAAGACTACTACACTAATAAATAACTTCCCTCTAGCGCGTAGGCCCTTGA     |
| P107-4  | PY03350 | H2-Ld | HPVQLFYIL  | 30.51 | YPLLHPVQLFYILGGED*  | TATCCTCTTCTTCCACCTGTGCGAGCTGTGTTCTACATCTAGGAGGTAGGACACTGA    |
| P107-5  | PY03350 | H2-Ld | FPLSNLKYL  | 44.62 | HAVLFPLSNLKYLILAK*  | CATGCAGTCTGTTCCTCTGAGTAACCTGGAAGTACCTGATAGCTAGCTAAATGA       |
| P107-6  | PY03353 | H2-Kd | FYGPLLSLI  | 4.5   | RGYKGYPLLSLIQCGY*   | ATAGGCGCTATAAGGGCTACTTCCCTCTGCTGAGCATATCTGAGTGTGGGTATTGA     |
| P107-7  | PY03353 | H2-Kd | YIESKNNI   | 8.2   | SFGLYIESKNNISAGG*   | TCATTGCGGCTGATCTACATAGAGAGTAAGAACATAATCTCTGCAAGCGGCGTGA      |
| P107-8  | PY03353 | H2-Kd | KYLKNYFLI  | 8.42  | LNNVKLYKNYFLIAGWQ*  | CTGAAGCTAGTGAAGTAACTGGAAGAACTACTTCTGATGACCGCGGTGACACTGA      |
| P107-9  | PY03353 | H2-Kd | YYSIMNFFI  | 9.22  | GVLFYYSIMNFFIEDTF*  | GGCGTCTCTTCTACTATAGCATAAATGAACCTTCTTCATAGAGGATACATTCTGA      |
| P107-10 | PY03353 | H2-Kd | KYISPIYI   | 11.97 | QLLDKYISPIYISYISLF* | CAATTGTAGATAAGTACATAAGCCCTTACATCTACATAAGTTTCTCGTACTGA        |
| P108-1  | PY03353 | H2-Kd | KYSYGYPFL  | 12.72 | AAYEKYSKGYPFLRQVK*  | GCAGCCTATGAAAAGTATAGTAAGGGCTACTTCCCTCTGAGACAGCTGGAAGTGA      |
| P108-2  | PY03353 | H2-Kd | LYFKITNII  | 19.42 | TALVLYFKITNIDLRR*   | ACCCTAGCCGCTCCTGTACTTTAAGATAAATCAACATATAAGACTGAGGAGGTTGA     |
| P108-3  | PY03353 | H2-Kd | SYNKNTEI   | 22.86 | FKQASYNKNTEIIEGLAG* | TTTAAGCAGGCTAGCTATAAATAAAGAACACTGAGATAGGCTAGCCGCGATGA        |
| P108-4  | PY03353 | H2-Kd | SFFLYSYNI  | 26.31 | CKTESFFLYSYNITLKI*  | TGTAAGAACTGAGAGCTTCTTCTGAGCTATAGTAACATCAACACTGAAATTTGA       |
| P108-5  | PY03353 | H2-Kd | TYIEYYIIL  | 26.64 | ARQLTIEYYIILDENS*   | GCTGCCAGCTAACCTACATAGAGTACTACTAGCTACCTAGATGAGCAACTCTTGA      |
| P108-6  | PY03353 | H2-Kd | KYILLFINI  | 27.32 | GLEGKYLILLFINIFFHC* | GGGCTAGAAGGTAAAGTACATCTGCTGTCTTCCGTAACATCTTCTTCCACTGTTGA     |
| P108-7  | PY03353 | H2-Kd | KFIKKNISI  | 32.19 | SQGVKFIKKNISIDAF*   | AGTCAAGGCGTGAAGTTCATAAAGAAGATAAATAGCATCTCTGACGCCCTTCTGA      |
| P108-8  | PY03353 | H2-Kd | NYFKLPYGI  | 35.48 | ASLNYFKLPYGIIRPSA*  | GCTAGTCTAACTAACTACTTTAAGCTTCTTACGCTACCGCCTACGAGCTAGGATGA     |
| P108-9  | PY03353 | H2-Kd | TYQKLNEE   | 47.59 | RSKVTYQKLNEEITLIT*  | CGATCTAAAGTAACCTACCAGAAGCTGAATGAGGAGATGAACAATCTTGACCTGA      |
| P108-10 | PY03353 | H2-Ld | YPWLYKYIL  | 37.29 | SGWVYPWLYKYILRIHG*  | TCTGGATGGGTGATCCCTGGGCTGTATAAGTACATCTCTGATGAACATCCACGGGTGA   |
| P109-1  | PY03361 | H2-Kd | FYKYKICSH  | 5.7   | SLQTFYKYKICSHIELLE* | AGCCTCCAAACCTTCTACTATAAGATCTGTAGCCACATAGAAGTGTAGAGTGA        |
| P109-2  | PY03361 | H2-Kd | FYNLKHKKI  | 11.55 | FWNIFYNNLKHKKIAQPH* | TTCTGGAATATCTTCTATAAATACCTGAAGCATGAAGTAGGCCCAACCACTGA        |
| P109-3  | PY03361 | H2-Kd | AYFNNVIEL  | 15.26 | IVSLAYFNNVIELSTRA*  | ATAGTGTCTCTAGCCTACTTTAATAACGTGATAGAGCTGAGTACCCGCGCTTGA       |
| P109-4  | PY03361 | H2-Kd | FYSKSTNAL  | 18.35 | YWYDFYKSTNALAPEL*   | TACTGGTATGATTTCTATAGTAAGAGCACTAACGACCTAGACCTAGACCTGTTGA      |
| P109-5  | PY03361 | H2-Kd | KMINDLNYI  | 20.03 | LRFRKMINDLNYIIPYGS* | CTGAGGTTTAGAAAAGTATGAATAAGTACCTGAACTACATCCCATACGGTAGCTGA     |
| P109-6  | PY03361 | H2-Kd | YYQDKINEL  | 48.77 | TECGYYQDKINELRQLN*  | ACTGAGTGTGGATACTACCAGGATAAGATAAATAGCTGCGCGGCTTGGAATTGA       |
| P109-7  | PY03361 | H2-Ld | VPMDNSIFL  | 46.91 | KPLTVPMDNSIFLEEQY*  | AAACCACTAACTGTGCCTATGGATAATAGCATCTTCTTGAAGAGAGTACCGATGA      |
| P109-8  | PY03377 | H2-Kd | SYKPHYVTI  | 8.28  | LVSIYSKPHYVTIKGSP*  | TTAGTGAGTATAAGCTATAAGCCCTCACTACGTGACCATAAAGAGGATCCCCCTGA     |
| P109-9  | PY03377 | H2-Kd | HYVTIIFI   | 8.64  | SPGGHYVTIIFISQDNV*  | AGCTCTGAGGGGCACTACGTGACCATAAATCTTTAGCATACAGGATGAATGTTTGA     |
| P109-10 | PY03379 | H2-Kd | SYLNSQNEI  | 4.01  | VGRLSYLNSQNEIIGPLL* | GTAGGTAGATGTAGCTACCTGAATAGCCAGAATGAGATAGGCGGCTCTGCTGTGA      |
| P110-1  | PY03379 | H2-Kd | YYFDKDSFI  | 4.86  | EVVLYYFDKDSFIHKLK*  | GAGGTAGTCTGTACTACTTTTGATAAGGATAGCTTCTATCCACTCTAGGAAGGTTGA    |
| P110-2  | PY03379 | H2-Kd | LYFINKSNI  | 7.33  | PTTELYFINKSNIQEDW*  | CCAAAGCTGAACTGTACTTCAATAAAGAGTAACATAAAGAGGAGGACTGGTGA        |
| P110-3  | PY03379 | H2-Kd | KYISLYLYI  | 9.67  | GAAAKYISLYLYIYADQ*  | GGCGCCCGCCTGAAGTACATAAGCCTGTACCTGTACATAGCTGACACCTGTTGA       |
| P110-4  | PY03379 | H2-Kd | TYIKILRTI  | 11.7  | MRALTYIKILRTIALVK*  | ATGCGTGCCCTGACCTACATAAAGACTCTGAGAACCATAGCTCTAGTGAATGA        |
| P110-5  | PY03379 | H2-Kd | LYLDMLSLI  | 13.92 | SFECNLYLDMLSLISAY*  | TCTTTGAGTGTAACTACTAGACATGCTGAGCCTGCTGTCCGCTATATATTGA         |
| P110-6  | PY03379 | H2-Kd | LYLILSNI   | 18.77 | PSCHLYLILSNIKTQY*   | CCTTCTTGCCACCTGTACCTGTACATCTGCTGAGTAACATAAAGAACAGGATGA       |
| P110-7  | PY03379 | H2-Kd | YYYFKMNI   | 19.78 | PEMIYYYYFKMNLIGKE*  | CCTGAAATGATTTACTACTACTTTAAGATGAACCTGATAGGTGAAGGGTGAATGA      |
| P110-8  | PY03379 | H2-Kd | LYLACSEN   | 37.87 | AAANEKYLACSENLLMGL* | GCCGCTAATGAAAAGTACCTAGCCTGTAGTGAGAACCTGTTAATGGGGCTGTGA       |
| P110-9  | PY03379 | H2-Kd | KFFDIICE   | 41.39 | DNLCKFFDIICEILLKL*  | GATAACCTGTGTAAGTTCTTTGACATAATCTGTGAGATCTTCTAGGCTGCTGA        |
| P110-10 | PY03379 | H2-Kd | FLFYDYSKI  | 45.81 | NHAKFLFYDYSKIAMLA*  | AACCATGCTAAGTTCTGCTTCCCTACCTATAGCTGAGTAACATAAGGATGATGCTTTGA  |
| P111-1  | PY03426 | H2-Kd | NYIPSFNLL  | 8.9   | HKEANYIPSFNLLKPOE*  | CATAAGGAAGCTAACTACATCCCTAGCTTTAAACCTGCTGAAGCCTCAGGAGTGA      |
| P111-2  | PY03426 | H2-Kd | IYQGDIAVI  | 24.15 | NIKLIYQGDIAVIYIENS* | AACATAAACTGATCTACCAGGGTGACATAGCTCACTAATAGAAAATAGCTGA         |
| P111-3  | PY03426 | H2-Kd | FYHEVKRSL  | 30.91 | RTHRFYHEVKRSLSAWE*  | AGAACCACCCGCTTCTACCATGAGGTGAAGAGAGGCGCTGTCCCGCTGGGAGTGA      |
| P111-4  | PY03461 | H2-Kd | KYASASIFI  | 11.92 | MLPKYKASASIFLIKDD*  | ATGCAATTGCGCTAAGTATAGCGCTAGCATCTTCTGATGCTCAAGGATGATTGA       |
| P111-5  | PY03463 | H2-Kd | KYLTYRIFL  | 28.2  | GLTMKLYLTYRIFLSRNV* | GGACTGACTATGAAGTACCTGACCTATAGAACTATGAACTTCTGCTGTAGGAACGTATGA |
| P111-6  | PY03463 | H2-Kd | SYIKIREKL  | 28.66 | DVHASIYKIREKLLRAI*  | GATGTACACGCTAGCTACATAAAGATAAGAGAGAGCTGCTGAGAGCTATTGA         |
| P111-7  | PY03463 | H2-Kd | RYKNGFIKI  | 39.94 | QLIERYKNGFIKIGLTL*  | CAGCTGATAGGAGATATAAGAAAGGCTTCTATAAAGATAGCTGTGAGCCTTTGA       |

|         |         |       |            |       |                     |                                                            |
|---------|---------|-------|------------|-------|---------------------|------------------------------------------------------------|
| P111-8  | PY03463 | H2-Ld | YPNDNGRIF  | 44.41 | A EADYPNDNGRIFTEE*  | GCTGAAGCTGACTACCCATGATAACCGTAGAATCTTCTTCACTGAGGAGTGA       |
| P111-9  | PY03464 | H2-Kd | VYMYLDLSL  | 30.85 | TMGKYVYMYLDLSLEH*   | ACTATGGGTAAAGTGTACATGATCTACCTAGATAGCCTGCTAGAGCTGCACCTGA    |
| P111-10 | PY03464 | H2-Kd | CYSEMNVKI  | 34.2  | QGIACYSEMNVKIKVQP*  | CAGGTATAGCCTGCTATAGTACAGTGAAGCTGAAGCTGCGGTCCGACCATGA       |
| P112-1  | PY03464 | H2-Kd | KYVFIPINI  | 35.55 | SRPTKYVFIPINIAAME*  | TCTAGACCCACTAAGTACGTGTTCATCCCTATAAACATAGCCGCTATGGAATGA     |
| P112-2  | PY03473 | H2-Kd | SYIRGTNGI  | 3     | RATYSYIRGTNGIPSVM*  | AGGGCAACATATAGCTACATAAGAGGCCACTAACGCCGCTCCCATCTGTAATGTGA   |
| P112-3  | PY03473 | H2-Ld | RQMSSSCFL  | 49.17 | VSERRPQMSSSCFLRLV*  | GTGAGTGAAAGGAGACCTCAGATGAGTAGCTGCTTCTCGGTGAGACTAGCTCTGA    |
| P112-4  | PY03479 | H2-Kd | YYIKPHIDI  | 10.47 | LCTVSYIYKPHIDIKYGF* | CTGTGTACAGTGAAGTACTATAAGATCCCTCATGACATAAAGATGAGGGTTTGA     |
| P112-5  | PY03479 | H2-Kd | YFIEKNPII  | 47.89 | HSPVYFIEKNPIESVK*   | CATAGTCCAGTGTACTTTCATAGAGAATAAGATCCCTATAGAGTCAAGTAAGTGA    |
| P112-6  | PY03480 | H2-Kd | KYFLSPGFI  | 10.19 | STLLKYFLSPGFIVVQP*  | TCCACCCCTCTTGAAGTACTTCTGAGCCCTGGCTTCATAGTAGTCCAGCCATGA     |
| P112-7  | PY03480 | H2-Kd | IYLYTMGTI  | 14.88 | DGCPYIYLYTMGTIEVAT* | GATGGGTGTCCCTATCTACCTGTACACCATGGGCACCATGAAGTAGCCACATGA     |
| P112-8  | PY03480 | H2-Kd | KYDKGLYTI  | 15.25 | PMPTKYDKGLYTIICRNS* | CCCATGCCGACTAAGTATGATAAGGGCCTGTACACCATCTGTAGAAAGTCTCTGA    |
| P112-9  | PY03480 | H2-Kd | SYLNFSTDI  | 18.59 | TESSSYLNFSTDIEMSQ*  | ACTGAGTCTAGTAGCTACCTGAACCTTTAGCACTAGCAGCATGAAGATGTCTCAGTGA |
| P112-10 | PY03480 | H2-Kd | SYEEYLSFL  | 19.71 | IPFVSYEEYLSFLQNE*   | ATCCCTTTCTGAGCTATGAGGAGTACCTGAGCTTCTGCTCCAGAAATGAATGA      |
| P113-1  | PY03480 | H2-Kd | YVIDNPNEL  | 25.1  | EQRAVYIDNPNELKACE*  | GAGCAGAGGGCTGTGTACATAGATAACCCCTAATGAGCTGAAGGCTTGTGAATGA    |
| P113-2  | PY03480 | H2-Kd | NYFPEIQFL  | 29.37 | RPPMNYFPEIQFLSLRP*  | AGGCCCCCTATGAACCTACTTCCCTGAGATCCAGTTCTCGAGCCTCCACAGTGA     |
| P113-3  | PY03480 | H2-Kd | KQLYYLVTI  | 30.42 | LNTRKQLYYLVTLSPKC*  | CTGAATACACGTAAGCAGCTGTACTACCTAGTGACCATAAGCTTTAAGTGTGTA     |
| P113-4  | PY03480 | H2-Kd | SKNNVINFI  | 37.07 | SSKPSQNNVINFINFGNT* | TCTAGTAAACCTAGCCAGAAATAACCGTGAATAACTCATAAACGGTAATCTACTGA   |
| P113-5  | PY03480 | H2-Kd | HYSESTESL  | 38.5  | PSQLHYSESTESLSQSV*  | CCGCTTCAACTACACTATAGTGAGAGCAGTGAAGCCCTGCAGCTGCCGAAGTATGA   |
| P113-6  | PY03491 | H2-Kd | SYMSENEML  | 6.2   | GHMFYSYMSENEMLDWV*  | GGGCATATGTTTAGCTACATGTTTAAAGAGATGAGCTGAAGCTGGGCTTCGTGA     |
| P113-7  | PY03491 | H2-Kd | NYINNFENI  | 6.41  | NYPHNYINNFENIGEEK*  | AATTACCCCATAACTACATAAAATAACTTTGAGAACATAGGTGAGGAGAAGTGA     |
| P113-8  | PY03491 | H2-Kd | KYKSELSSI  | 9.3   | IQASKYKSELSSILVSQ*  | ATCCAAGCGTCTAAGTATAAGAGTGAGCTGAGTAGCATCTGATGAGCCAAATGA     |
| P113-9  | PY03491 | H2-Kd | KFLDNLSSI  | 9.66  | VTPNKYKFLDNLSIQSHG* | GTAACCCCTAATAAGTTCCTAGATAACCTGAGTAGCATCCAGAGCCAGGAGTGA     |
| P113-10 | PY03491 | H2-Kd | SYRNDNCNI  | 12.79 | PILRSYRNDNCNIIWERA* | CCCATATTAAGGAGCTATAGAAATGACTGTAAAGTAGCTCGGGAGAGGAGCTGA     |
| P114-1  | PY03491 | H2-Kd | VYLDGWPHI  | 16.77 | RSAPVYLDGWPHIFVTF*  | AGGCTCGCCCGGTGTACCTAGACGGCTGAGCCTACATCTTGTGTAACTCTCTGA     |
| P114-2  | PY03491 | H2-Kd | MYLNQNKYI  | 24.61 | DDSDMYLNQNKYISVDD*  | GATGATAGTGACATGTACCTGAACAGAGAATAAGTACATCTCTGTAGATGATTGA    |
| P114-3  | PY03491 | H2-Kd | AYYNNMMKL  | 36.78 | DCAYAYYNNMMKLGSLE*  | GACTGCGCATATGCCTACTATAACTACATGATGAAGCTAGCATAGCAATGA        |
| P114-4  | PY03491 | H2-Kd | IQSHLSLYI  | 39.19 | LVQIIOHSHLSYITLMR*  | CTAGTGCAGATAATCCAGCATAGCCACCTGAGCTACATACACTAATGCGCGTGA     |
| P114-5  | PY03493 | H2-Kd | KYNSNLIYI  | 11.23 | PLSMKYKNSNLIYLGLEQ* | CCTCTGAGTATGAAGTACGTGAATAGCATAACTTACTAGGTGCTTAGAGCATGA     |
| P114-6  | PY03493 | H2-Kd | RYSNLIYFI  | 12.15 | QPSARYSNLIYFIKCKS*  | CAGCCCTCAGCTAGATATAGCATAAACCTGTACTTTCATAAAGTGTAAAAGTTGA    |
| P114-7  | PY03493 | H2-Kd | RYFKEVFIH  | 12.31 | QIYNRYFKEVFIHLDPF*  | CAAAATTTAATAGATACCTTTAAGGAGGTGTTCCACATCTAGACCCCTTTTGA      |
| P114-8  | PY03493 | H2-Kd | LYINMLNLI  | 16.29 | TLDKLYINMLNLRKYR*   | AGCTTAGATAAGCTGTACATAAACATGCTGTGATAAACCTGAGGACCGAGTGA      |
| P114-9  | PY03493 | H2-Kd | YVHIISCFI  | 42.14 | PNAPYVHIISCFLWQD*   | CCTAACGCCCTTACTACCATATAAAGCTGCTTCTGAGGTGGCAGAGCTGA         |
| P114-10 | PY03493 | H2-Ld | VPNISITYL  | 44.99 | SRAGVPNISITYLWLYT*  | AGTCGAGCCGGGTGCGCTAACATAAGCACTACATCTCTGTGTGTTACTGTACATGA   |
| P115-1  | PY03513 | H2-Kd | RYLKLIITSL | 8.33  | SCESRYLKLIITSLCRKJ* | AGCTGTGAATCTAGATACCTGAAGCTGTAACTAGCCTGTGTAGGAAAGGTGTA      |
| P115-2  | PY03513 | H2-Kd | SYKNTNWL   | 39.98 | FYSEFYKNTNWLFLTEBR* | TTTTACTCTGAATTTCTATAAGGACATCTGGAACCTCTGCTGAGGATAGGTGA      |
| P115-3  | PY03513 | H2-Kd | KYRISLPLI  | 41.92 | CPRAKYRISLPHIMTGR*  | TGCCCTCGAGCTAAGTATAGAATAAGCCTGCGCTCACATAAGACAGGGCGCTGA     |
| P115-4  | PY03513 | H2-Ld | IPFVSFYFM  | 16.22 | KNMKIPFVSFYFMVLGR*  | AAGAACATGAAGATCCCTTTCTTTAGCGTGTCTTACATGGTGTGACGCGTGA       |
| P115-5  | PY03521 | H2-Kd | KYLRMFYAL  | 8.15  | GKRIKYLRMFYALELNE*  | GGTAAGAGAATAAAGTACCTGAGAATGTCTTACGCCCTAGAACTGAATGAGTGA     |
| P115-6  | PY03521 | H2-Kd | KYNNSEDSI  | 9.36  | VNPKYNNSEDSIAYVL*   | GTGAATCCCTGTAAGTATAATAAGTAGGAGTAGCATAGCATACCTGCTCTGA       |
| P115-7  | PY03521 | H2-Kd | KYDHLSQL   | 31.32 | LLSDKYDHLSQLLGALE*  | TTATGAGTGATAAGTATGACCACATCTCTGAGCCAGCTCCTAGGAGCTGAGTGA     |
| P115-8  | PY03523 | H2-Kd | KYFVYVDKI  | 7.66  | AVPKYFVYVDKICEKP*   | GCTGTCCTGTATAAGTACTTCTGTACGTAGATAAGATCTGTGAAAAGCCATGA      |
| P115-9  | PY03523 | H2-Kd | SYITVEINI  | 10.28 | QSMPSYITVEINIPDQV*  | CAGTCCATGCCTAGCTACATAACCGTAGAGATAAACATCCCTGTATGAGCTATGA    |
| P115-10 | PY03523 | H2-Kd | YYCGMKNDI  | 45.82 | NGKNYYYCGMKNDILILA* | AACGGTAAAAATTAAGTCTGCGGCATGAAGAATGACATCTGCTATGACCGTGA      |
| P116-1  | PY03533 | H2-Kd | MMISGTTVI  | 24.51 | ITKAMMISGTTVIPPKD*  | ATAACTAAGCGGATGATGATAAGCGGCACCCCGTGATCCCTGCTAAGGATTGA      |
| P116-2  | PY03581 | H2-Kd | KYYPHTLNL  | 5.63  | KSAIKYYPHTLNLGAPG*  | AAATCAGCTATAAAGTACTACCCCTCACACCCTGAACCTAGGTGCCCTGGATGA     |
| P116-3  | PY03581 | H2-Kd | KYDENYSNI  | 11.96 | IQAMKYDENYSNIAKEV*  | ATTCAGGCTATGAAGTATGATGAGAATAATAGTAACATAGCTAAGGAGAATGA      |
| P116-4  | PY03581 | H2-Kd | KYNYIKLEI  | 17.86 | AETGKYNYIKLEISMEV*  | GCTGAAAACCTGGTAAGTATAAAGTACATAAAGCTAGAGATAAGCATGGAGGTGTA   |
| P116-5  | PY03582 | H2-Kd | RYMKSNVTI  | 2.89  | SPVIRYMKSNVTTIVAP*  | AGGCCCGTAATAAGATACATGAAGAGTAAAGTACGACCATAGTAGTATGCCCATGA   |
| P116-6  | PY03582 | H2-Kd | KYMFVKENI  | 8.67  | LVINKYMFVKENIADP*   | CTAGTGATAAATAAGTACTACTTCTGGGAAGGAGAACATAGCCCTTTGATGGTGA    |
| P116-7  | PY03582 | H2-Kd | FYFSNTICL  | 29.48 | KDSFFYFSNTICLEYRG*  | AAAGATTCCCTTCTTCTACTTTAGTAACACCATCTGCCTAGAATACCGAGGATGA    |
| P116-8  | PY03590 | H2-Kd | SYKNTNLV   | 31.27 | SSQLSYKNTNLVLRVAA*  | TCTAGCCAGCTGAGCTACTATAAAGAACACTAACCTAGTGGCGGCAAGTGTGA      |
| P116-9  | PY03590 | H2-Kd | IFISIFSTI  | 31.63 | FDIKIFISIFSIGKAF*   | TTTGATATAAAAACTCTCATAGCATCTTCACTAGCATAGGTAAAGCTTTCTGA      |
| P116-10 | PY03599 | H2-Kd | LYLINNNYI  | 8.89  | CAVKLYLINNNYIPIPPG* | TGCGCGGTGAAACGTGACCTGTATAATAATAAGTACATAATCTCCCGGATGA       |
| P117-1  | PY03599 | H2-Kd | LYITEIGPI  | 37.73 | STNPLYITEIGPIAVSS*  | TCAACTAACCTCTGTACATAAAGTGAAGTGGCCCTATAGCCGCTGCTGCTTGA      |
| P117-2  | PY03600 | H2-Kd | FYTDILYRI  | 23.7  | QMVLFYTDILYRILPVD*  | CAGATGGTCTTGTCTACACTGACATCTCTGTATAGAACTCTGCGCCGTGAGTTGA    |
| P117-3  | PY03600 | H2-Kd | LYFLNDITI  | 37.18 | FIPILYFLNDITICPKA*  | TTCATCCCTATTCTGTACTTCTGTAAGTACATATAAGCTATGCTGCCCTAAGCGTGA  |
| P117-4  | PY03616 | H2-Kd | LYINVDDYI  | 4.98  | CDSMKYINVDDYIKGQC*  | TGTGATTCAATGAAGTACATAAACGCTAGATAGTACTATAAAGCGCCAGTGTCTGA   |
| P117-5  | PY03616 | H2-Kd | KYIMHMPSL  | 44.07 | FPETLYIMHMPSLSQHL*  | TTCCCTGAAACACTGTACATAATGCGCATGCTGACGCTGTCTGACGATTTATGA     |
| P117-6  | PY03622 | H2-Kd | CYTNNVISIL | 12.75 | PENRCYTNNVISILYEOT* | CCTGAGAATCGCTGCTACACTAATAACGCTGAGCATCTCTGTATGAGCAAACTGA    |
| P117-7  | PY03622 | H2-Kd | CYTNNVISIL | 12.75 | SKSQCYTNNVISILLPII* | ATAAGAGCCAACTGCTACACTAATAACGCTGAGCATCTGCTGTGCCATCTGTGTA    |
| P117-8  | PY03684 | H2-Kd | SYNTRKQFL  | 12.94 | CSYKSYNTRKQFLEPVE*  | TGCTCTTATAAAGCTATAATAGAAGTAAAGCAGTCTCTAGAGCTGTAGATGA       |
| P117-9  | PY03684 | H2-Kd | TYMTEQYII  | 18.28 | LSINTYMETEQYIIRLET* | CTGTCAATAAACACCTACATGACTGAGCAGTACATAAAGATATAGACATGA        |
| P117-10 | PY03684 | H2-Kd | VYQKWRNLI  | 27.72 | SRPCVYQKWRNLILGKP*  | TCTAGACCATGCGTGTACCAGAAGTGGAGAAACCTGATCCTAGGTAAACCTTGA     |
| P118-1  | PY03684 | H2-Kd | KYLIHQITYM | 34.94 | SQNNKYLIHQITYMPRTL* | AGCCAGAAATAAGTACCTGCACATCCAGACCTACATGCTCGGCATCTCTGA        |
| P118-2  | PY03694 | H2-Kd | YIYKIMHNL  | 7.47  | NSLEYIYKIMHNLMPGQ*  | AATTCACTAGAGTACTACATAAAGATAATGCTAAACCTGATGGGCGCCAGTGA      |
| P118-3  | PY03694 | H2-Kd | TYHYALSLF  | 9.01  | YSFSTHYHYALSFLDQL*  | TATTTCTTTAGCACCTACCCTACGCGCTGAGCTTCTAGATCAGTAAACCTGA       |
| P118-4  | PY03694 | H2-Kd | FYMDNSGKI  | 12.77 | GEPSFYMDNSGKIPSL*   | GGTGAGCCATCTTCTACATGGATAATAGCGGTAGAGATCCCTGAGCAGCTGTA      |
| P118-5  | PY03694 | H2-Kd | KYITIDDOI  | 13.7  | VRGMKYITIDDIIVGTC*  | GTGCGTGCCATGAAGTACATAAACCATAGATGACATAGTAGTAGTACTTGTCTGA    |
| P118-6  | PY03694 | H2-Kd | KYVINSFLNV | 29.14 | KLAQKYVINSFLNVIQGA* | AAGTACGCTCAGAAGTACGTGAATAGCCTGTTAAAGTATGCTGAGGCGCGGTGA     |
| P118-7  | PY03694 | H2-Kd | LYTHFTSPI  | 31.11 | DRRWLYTHFTSPIIDVS*  | GATAGGCGTGTGCTGTACACCCACTTCACTAGCCCTATAATAGACGTGAGTGA      |
| P118-8  | PY03694 | H2-Kd | PYFRACFSI  | 32.34 | FHCAPYFRACFSIGSNS*  | TTTCACTGCGCACCTTACTTTAGAGCCTGCTTTAGCATAGGATCAACTCTGTA      |
| P118-9  | PY03694 | H2-Kd | SYGFSFKHKI | 33.7  | DFVSSYSGFSFKHKSRSV* | GATTGTGCTCTAGCTACGCGTAGCTTTAAGCATAGAATAAGGATAGAGTTTGA      |
| P118-10 | PY03694 | H2-Kd | LQFNNSNSI  | 41.81 | CRGDLQFNNSNSIDCSG*  | TGTAGAGGTGACCTGCGAGTTTAAATAAATAGTAACATAGACTGTAGCGGTTGA     |
| P119-1  | PY03716 | H2-Kd | SYGSLINSI  | 7.23  | SIAASYGSLINSILAYR*  | AGTATAGCGGCTAGCTACGCTAGCCTGATATAAAGTACCTCCTAGCTATAGATGA    |
| P119-2  | PY03716 | H2-Kd | KYFKIYNSM  | 22.29 | NILMKYFKIYNSMPLCQ*  | AACATTTTGATGAAGTACTTTAAGATCTATAATAGCATGCTCTGTGTCAATGA      |
| P119-3  | PY03733 | H2-Kd | SYIKSLTDI  | 4.3   | DDNISYIKSLTDINCNE*  | GATGATAACATAAGCTACATAAAGAGCCTGACTGACATACATAAATGTAATGAGTGA  |
| P119-4  | PY03733 | H2-Kd | KYFDKICSI  | 4.93  | YESQKYFDKICISIIISF* | TATGAAAGTCAGAAGTACTTTGATAAGATCTGTAGCATATGATCTCTCTGTGA      |
| P119-5  | PY03733 | H2-Kd | FFIPNSHSL  | 24.56 | ETLNFIPNSHSLSKCV*   | GAGACACTGAATTTTCTCATCCCTAATAGCCATAGCTGAGTAAAGTCCGATGA      |
| P119-6  | PY03733 | H2-Kd | KYALDISVL  | 32.17 | PVTEKYALDISVLTVST*  | CCTGTGACTGAAAGTACGCCCTAGACATAAGCGTGCTGACCGTGAGCACCTGA      |
| P119-7  | PY03733 | H2-Kd | TYICFWQLI  | 36.48 | PKLRTYICFWQLITIKE*  | CCTAAGCTGAGGACCTACATCTGCTTCTGGCAGCTGATAACCATAAAGGAATGA     |
| P119-8  | PY03745 | H2-Kd | YYNENVGQI  | 10.47 | VKGFYNNENVGQIRTMK*  | GTGAAGGGATTCTACTATAATGAGAAGCTAGGCCAGATAAGGACCATGAAGTGA     |
| P119-9  | PY03745 | H2-Kd | SYDKYTSAL  | 49.71 | SSLMSYDKYTSALPTVI*  | AGCTCGCTGATGAGCTATGATAAGTACACTAGCCGCTGCGCAACCGTGATTTGA     |
| P119-10 | PY03755 | H2-Kd | KYKYLHLAI  | 19.35 | SEGLKYKYLHLAIDROF*  | AGTGAAGGGCTGAAGTATAAGTACCTGCTGCGACGCCATAGACCGCGGATTTGA     |
| P120-1  | PY03769 | H2-Kd | LYISTNNRL  | 13.41 | RMSSLYISTNNRLAKRE*  | CGGATGTCTTCCCTGTACATAAGCACCACATAATAGACTAGTAAAGAGGAGTGA     |
| P120-2  | PY03769 | H2-Kd | KQFKNNYNSL | 16.08 | LCFDKQFKNNYNSLSAR*  | CTTTGCTTTGATAAAGCAGTTTAAAGAACTTAATAGCTGAGTTCGCGCTTTGA      |
| P120-3  | PY03769 | H2-Kd | IYKNIHPTI  | 19.43 | CAAKIYKNIHPTIERLK*  | TGCCGCCCTAAGATCTATAAAGAACCTCCACCACACCATAGAGAGAGCTGAAGTGA   |
| P120-4  | PY03769 | H2-Kd | YIIECLPNC  | 25.57 | TILAYYIIECLPNCPG*   | ACTATACTAGCATACTACATAAAGTAGTGCTGCTCTATAAAGCTGCGGCTGA       |
| P120-5  | PY03769 | H2-Kd | KYINEQKVI  | 27.09 | ESWAKYINEQKIVIMVIV* | GAGTCTGGGCTAAGTACATAAATGAGCAGAAGGTGATAATGGTAATAGTCTGA      |
| P120-6  | PY03769 | H2-Kd | CYNETGYNI  | 33.48 | GLITCYNETGYNIRLFI*  | GGCCTGATAAAGTACTATAAATGAGACCGGCTAATACATCTCTCGTTTGTCTGA     |
| P120-7  | PY03769 | H2-Ld | SPQFNFDTF  | 14.04 | IAGSSPQFNFDTFMSEL*  | ATAGCGGGTATGAGCCCTCAGTTTAACTTTGACACCTTCTGATAGAGCTCTGA      |
| P120-8  | PY03769 | H2-Ld | FPNNNILL   | 32.4  | VEELFPNNNILLQFQR*   | GTAGAGGAGTGTTCCTCAATAAATACATCTGCTGCTGCACTTCCAGAGATGA       |
| P120-9  | PY03770 | H2-Kd | SFNNTYHSL  | 9.95  | GGSLSFNNTYHSIIEED*  | GGTGGCTCTCTGAGCTTTTAAACACCTACCATGACATAGCATAGGAAGAGTGA      |
| P120-10 | PY03770 | H2-Kd | KYSYFDHAI  | 11.56 | PSQKKYSYFDHAIRATS*  | CCCTCACAGAAAAGTATAGCTACTTTGACACGCCCATAAAGAGCCACTAGTGA      |
| P121-1  | PY03791 | H2-Kd | IYLRAPHPI  | 7.54  | QDLEIYLRAPHPIMSG*   | CAGGACCTAGAGATCTACCTGAGAGCCCTGACCCCTATAATAGCTGAGGAGTGA     |
| P121-2  | PY03791 | H2-Kd | GYIKKEYSI  | 12.56 | ISPWGYIKKEYSILCQL*  | ATTTACACCTGGGGCTACATAAAGAGGAGTATAGCATCTTATGTCAACTGTGA      |
| P121-3  | PY03791 | H2-Kd | RYINNNIKL  | 14.49 | PVPLRYINNNIKLQNDG*  | CCGGTCCCTGTGAGATACATAAATAACATAAGCTGCAAGACCGGAGTGA          |
| P121-4  | PY03791 | H2-Kd | KYIIVALPL  | 25.72 | MPFDKYIIVALPLIEDN*  | ATGCCCTTTGATAAGTACATAAATAGGCCCTGAGCTCTGATAGAGAGTATTGA      |
| P121-5  | PY03791 | H2-Ld | YPNFIWFP   | 37.31 | ESRPYPNFIWFPFSLSR*  | GAGAGTGGCGCTTACCCCTTTAACTTCATCTGGCGCTTCTCACTTTCCCGCTGA     |
| P121-6  | PY03808 | H2-Kd | KYLNLFENFI | 30.02 | QECGKYLNLFENFIEAKV* | CAGGAGTGGCGTAAAGTATAACACTGTTTGAGAACTTTCATAGAAAGTGTGA       |
| P121-7  | PY03808 | H2-Kd | KYQEFSEFI  | 41.73 | QIVDKYQEFSEFILARL*  | CAAAATAGTAGATAAGTACCCAGGATTTAGCTTCATCCTGAGACTGAGACCATGA    |
| P121-8  | PY03814 | H2-Kd | YVYVNSDFL  | 4.6   | RDNAYVYVNSDFLDEVP*  | AGAGATAAGCGCATACTACTAGCTGAATGATAGCTTCTAGATGAGGTCCGCTGA     |

|         |         |       |                  |       |                                                       |                                                              |
|---------|---------|-------|------------------|-------|-------------------------------------------------------|--------------------------------------------------------------|
| P121-9  | PY03814 | H2-Kd | AYNQNYASI        | 5.68  | KSASAYNQNYASIKVQQ*                                    | AAAAGTGCTTCTGCCTATAACCAGAACTACGCTAGCATAAAAGTGCAGCAGTGA       |
| P121-10 | PY03814 | H2-Kd | SYIKKFFKI        | 9.77  | TLEVSYIKKFFKIKNAA*                                    | ACGCTAGAGGTTGAGCTACATAAAGAAGTCTTTAAGATAAAAAAGCCGCCGTTGA      |
| P122-1  | PY03814 | H2-Kd | KYTHMIYRI        | 10.93 | VLGIKYTHMIYRIULLR*                                    | GTGCTAGGCATAAAGTACACCCACATGATCTATAGACTGATCCTGTTGCCGTGA       |
| P122-2  | PY03814 | H2-Kd | NYFSLFDHI        | 11.12 | DLQLNYFSLFDHINNOD*                                    | GACCTCCAATTGAACTACTTTAGCCTGTTTGACCACATAAATAACCCAGGATTGA      |
| P122-3  | PY03814 | H2-Kd | EYMDNYFSL        | 20.36 | TVLLEYMDNYFSLAVQE*                                    | ACCGTCTCTGCTAGAGTACATGGATAACTACTTTAGCCTAGCCGTCGAGGAGTGA      |
| P122-4  | PY03814 | H2-Kd | EAPMGYINTLDLIEH* | 23.02 | EAPMGYINTLDLIEH*                                      | GAGGCTCCAATTGGGCTACATAAACACACCCCTAGACATAGAACTGACACATCTGA     |
| P122-5  | PY03814 | H2-Kd | FYFNTDDNL        | 25.8  | ENRGFYFNTDDNLVEVS*                                    | GAGAATAGAGGGGTTCTACTTTAACACCTGATGATAAAGCTGTATGAAGTCTCATGA    |
| P122-6  | PY03814 | H2-Kd | IYRSTLSYI        | 30.26 | IHKDIYRSTLSYLVLD*                                     | ATTCTAAGGACATCTATAGAAGCAGCTGAGCTAGCTAGCTAGCTAGCTAGCTGGA      |
| P122-7  | PY03814 | H2-Kd | IYNDLNTGI        | 33.23 | NDCYIYNDLNTGIPOQS*                                    | AATGACTGCTACATCTATAATGACCTGAACACCGGGCATCCCAAGTGTAGTTGA       |
| P122-8  | PY03814 | H2-Kd | MYVLAMSAI        | 33.96 | LSGLMYVLAMSAIKTP*                                     | CTGTCTGGCCTAATGTACGTGCTAGCCATGAGCGCCATAAAGACGACCCCTGA        |
| P122-9  | PY03816 | H2-Kd | KYIKTKNMI        | 3.51  | GQIAKYIKTKNMITGWK*                                    | GGACAAATAGCTAAGTACATAAAGACTAAGAACATGATAACCGGATGGAAGATGA      |
| P122-10 | PY03816 | H2-Kd | FYHQNGEII        | 44.01 | SGATFYHQNGEIIHDGL*                                    | TCTGGTGCCACTTTTACCACCAGACGGTGAGATAAATCCGTACCGTGTGTGA         |
| P123-1  | PY03817 | H2-Kd | RYFTIISEI        | 3.36  | GGNLRFYFTIISEIKFL*                                    | GGAGGTAATTTGAGATACTTACCATAATAAGTGAGATAAAATTCCTAATCTGA        |
| P123-2  | PY03817 | H2-Kd | KYINLCETL        | 5.2   | QFDIKYINLCETLDPQ*                                     | CAGTITTGACATAAAGTACATAAACCTGTGTGAGACCCCTAGACCCCTGCCAATGA     |
| P123-3  | PY03817 | H2-Kd | IYITGNAYI        | 5.2   | QGSLIYITGNAYLATD*                                     | CAGGGCTCGCTGATCTACATAACCGGTAAACCCCTACATCTTAGCCACTGACTGA      |
| P123-4  | PY03817 | H2-Kd | RYINDNNKI        | 7.65  | PIFYRYINDNNKIVTTH*                                    | CCAAATTTCTATAGATACATAAAATGATAAATAAGATAGTGAACAACACACTGA       |
| P123-5  | PY03817 | H2-Kd | TYLMDLNFNI       | 7.77  | AISDPTYLMDLNFNIH*                                     | GCTATAAGTGACACCTACCTGACCATGCTGTTTAAAGATCTAGATTTCCCTGTGA      |
| P123-6  | PY03817 | H2-Kd | IYYRNVIYI        | 14.79 | YLLFYIYYRNVIYINAIG*                                   | TACCTCCTGTTTATCTACTATAAGAACGCTGATCTACATAAACGCAATAGGCTGA      |
| P123-7  | PY03817 | H2-Kd | IYFSNNIKI        | 15.24 | RKRDIYFSNNIKISAIA*                                    | CGTAAGCGTGATATCTACTTTAGTAATAACATAAAGATCTCCGCTGATAAAGTGA      |
| P123-8  | PY03817 | H2-Kd | KYINNNNSNL       | 15.88 | FSFQKYINNNNSNLPTGV*                                   | TTTTCGTTTCAGAAGTATAACATAAATAAGTAAACCTGCCAACCGGGGTGTGA        |
| P123-9  | PY03817 | H2-Kd | SYIFTKYCL        | 20.92 | SLMESYIFTKYCLQNSP*                                    | TCGCTAATGAGAGCTACATCTTCACTAAGTACTGCCTGAGCATAGTACCCATGA       |
| P123-10 | PY03817 | H2-Kd | IYIATRRRI        | 23.07 | IAAIIYIATRRRIINLTH*                                   | ATAGCCGACGCTATCTACATAGCCACTAGAAGAATAAATAACTTGCAGCCACTGA      |
| P124-1  | PY03817 | H2-Kd | KYNSTDDEL        | 23.73 | FTGLKYNSTDDELFCFTP*                                   | TTACCGGGGTTGAAGTATAATAGCACTGACTTTGAGCCTGTGTTTACACCTTGA       |
| P124-2  | PY03817 | H2-Kd | SYNKNIEII        | 30.85 | TSVVSYNKNIEIIISFT*                                    | ACTTCAGTAGTGAGCTATAATAAAGAATGAGATAAATAACTTCTCAATACCCCTGA     |
| P124-3  | PY03817 | H2-Kd | IYISNIFAM        | 38.4  | KGTSIYISNIFAMHIIK*                                    | AAAGGTACCTCCATCTACATAAGTAAACATCTTTCGCGATGCATATAATAAGTGA      |
| P124-4  | PY03817 | H2-Ld | KYIKMSFNL        | 44.69 | LRKGKPYIKMSFNLFSQ*                                    | CTGAGGAAGGGTAAAGCCTATAAAGATGAGCTTTAACTGTATGCTACACAGTGA       |
| P124-5  | PY03832 | H2-Kd | YYQTPLSEI        | 3.95  | VYQHYIYQTPLSEISHDN*                                   | GTGTATCAGCAGCTACTACCAGACCCCTCTGAGTGAGATCTCCCATGATAATGTA      |
| P124-6  | PY03832 | H2-Kd | AYINDFYSI        | 4.19  | QTNRAIYAYINDFYSIDL*                                   | CAGACTAATAGGGCCTACATAAATGACTCTTATAGCATAGATATGCTTGGTGA        |
| P124-7  | PY03832 | H2-Kd | LYYFDSNFI        | 12.94 | NRRGLYIYFDSNFIHECF*                                   | AACCGTAGGGGAGCTGACTACTTTGATAGTAGTAAACATCCATGAATGTTTGA        |
| P124-8  | PY03832 | H2-Kd | IYKQNFDSI        | 19.49 | ASTDIYKQNFDSIITGS*                                    | GCTAGTACTGATATCTATAAGCAGAACTTTGATAGCATAATAACAGGCTAGCTGA      |
| P124-9  | PY03832 | H2-Kd | IFINSINNI        | 22.51 | GYRTIFINSINNIKASAM*                                   | GGTTATAGAACCTTCTTACATAAATAGCATAAATAAGCAATAAATCCGCAATGTGA     |
| P124-10 | PY03832 | H2-Kd | FYKYTYKNTI       | 25.89 | FGQFFKYTYKNTISQPT*                                    | TTCCGGTCAGTCTTCTATAAGACCTATAAAGAACCACCTCTCTCAGGCCAATCTGA     |
| P125-1  | PY03832 | H2-Kd | FYQFFYDIRA       | 27.64 | EKTKFYFYQFFYDIRIKA*                                   | GAGAAGACTAAGTTCTACTTCCAGTCTTCTTATGACATAAAGATAAAGCACTGA       |
| P125-2  | PY03832 | H2-Kd | LYQLTIESI        | 33.47 | KVKDLYQLTIESIPGVK*                                    | AAGGTGAAGGACCTGTACCAGCTGACCATAGAGAGCATCCCTGGAGTGAATAGTA      |
| P125-3  | PY03843 | H2-Kd | KKMNMFMTAI       | 32.61 | GGSMKKMNMFMTAIGCES*                                   | GGTAGCGGAATGAAGAAGATGAACATGTTCCACCGCATAGGCTGTGAGTCCCTGA      |
| P125-4  | PY03843 | H2-Kd | CFYNLNSPI        | 44.37 | EANRCFYNLNSPICLQO*                                    | GAGGCTAATCGTTGCTTCTATAACCTGAATAGCCCTATCTGTCTCCAGCAGTGA       |
| P125-5  | PY03875 | H2-Ld | SPFYNIYIF        | 8.98  | ERKESPFYNIYIFMKVS*                                    | GAGCGTAAAGAAAGCCCTTTCTATAACACTTACATCTTCAATGAGTCAAGTGTGA      |
| P125-6  | PY03911 | H2-Kd | LYYVNISKI        | 7.49  | TKLPLYYVNISKISIIP*                                    | ACTAAACTTCTCTGTACTACGTGAACATAAGTAAAGTAAAGTATAATCCCATGA       |
| P125-7  | PY03911 | H2-Kd | RFNLITSSL        | 26.01 | RATPRFNLITSSLQMEQ*                                    | CGGGCCACGCTAGATTTCATAAACCTGACTAGTAGCCTGCAAAATGGAACAGTGA      |
| P125-8  | PY03923 | H2-Kd | SYFMSKNDI        | 8.34  | YPDKSYFMSKNDIRDNO*                                    | TATCCTGATAAGAGCTACTTTCATGAGTAGAATAAGATGACATCCGCTGATAATCAATGA |
| P125-9  | PY03923 | H2-Kd | KQILKMSSI        | 15.02 | MLNTKQILKMSSIRHLL*                                    | ATGCTGAACACTAAGCAGATCCTGAAGTAGAGTAGCATGAAGACATCTGCTGTGA      |
| P125-10 | PY03941 | H2-Kd | SYVYIQNFI        | 24    | ATAVSYVYIQNFIYLYQI*                                   | GCTACAGCCGTGAGCTACGTGACATCCAGAACTTCTGATGTACAGCATCTGA         |
| P126-1  | PY03941 | H2-Kd | KYIFENSCL        | 27.06 | REMDKYIFENSCLSMES*                                    | CGTGAAATGGATAAGTACATAAGTGAAGATAGCTGCCTGAGCATGGAGTCCCTGA      |
| P126-2  | PY03941 | H2-Kd | KYKPFVVSLL       | 32.73 | LAYKKYKPFVVSLLHEQO*                                   | TTAGCCTATAAGAAGTATAAGCCTTTTCGTAGTAGAGTGAAGTGAAGCAAGTGA       |
| P126-3  | PY03941 | H2-Kd | LQYFPLNSL        | 42.92 | AHENLYQFPLNSLAESS*                                    | GCACATGAAAACCTGTACCAGTTCCTCTGTAATAGCCTAGCTGAATCATCTCTGA      |
| P126-4  | PY03941 | H2-Ld | LPVSNYYNF        | 14.65 | IGVLLPSVNYNFNLAH*                                     | ATAGGCGTTCCTCGCTAGCTGAACACTACTAATCTTAACTTACCTAGCCCATGA       |
| P126-5  | PY03941 | H2-Ld | FPLNSLTLF        | 34.87 | EQHQFPLNSLTLFVAVK*                                    | GAACAACACCACTTCCCTCTGAATAGCCTGAGCCCTGTTGCTAGCAGTGAATGA       |
| P126-6  | PY03952 | H2-Kd | SYFIEVFSI        | 1.86  | GVDESIFYFIEVFSIKLND*                                  | GGGGTAGTAGGAGGCTACTTTGAGGTGTTTATAGTACATAAAAGTGAATGACTGA      |
| P126-7  | PY03955 | H2-Kd | YYCPIYNNI        | 8.65  | AKNLYYCPIYNNLISSIE*                                   | CTGAAGAATCTCTACTACTGCCCTATCTATAAAGCTGATCTTCCATAGAGTGA        |
| P126-8  | PY03995 | H2-Kd | LFMMNGKNTI       | 21.26 | ERSPLFMNGKNTIQLFA*                                    | GAGCGTTACCCCTGTTCATGAACGGTGAAGAACCACCTCAGCGCTCTTGCGCTGA      |
| P126-9  | PY03995 | H2-Kd | HYCPPIYNL        | 34.24 | QNVYHYCPPIYNLCHDI*                                    | CAGAACGTGTACCACTACTGCTCCTATCTATAACCTGCGCATGACATCTGA          |
| P126-10 | PY04008 | H2-Kd | FYNNVWNQI        | 3.91  | IPPMFYNNVWNQINENG*                                    | ATTCCTCCCATGTTCTATAAATACGCTGTGGAAGCCAGATAAATGAAGACGGTGTGA    |
| P127-1  | PY04008 | H2-Kd | KYLNKNDLM        | 8.4   | KAPQKYLNKNDLMRELF*                                    | AAAGCACCCCAAAAGTACCTGAATAAAGACATGATCTTGAAGGAGTCTTGA          |
| P127-2  | PY04008 | H2-Kd | KYIEHIIFI        | 12.01 | HLRRKYIEHIIFITLML*                                    | CACCTACGCCGTAACTACTATGAGCACAATAATCTTCTACAACTAATGCTGTGA       |
| P127-3  | PY04008 | H2-Kd | KYENLIPSI        | 12.99 | LGRRKYENLIPSILQDP*                                    | CTAGGTAGAGGTAAGTATGAGAACCCTGATCCCTAGCATCTTGCAGGACCCCTTGA     |
| P127-4  | PY04008 | H2-Kd | TYLKNNINI        | 27.53 | LNAMITYLKNNNIIGFFP*                                   | CTGAATGCAATGACCTACCTGAAGAATAAACAATAAGTAAAGTATTTCCGGATGA      |
| P127-5  | PY04008 | H2-Ld | SPVDTYVIF        | 49.47 | VQGSSPDVITYVIFDKW*                                    | GATGGGCGAGTCTAGCCCTGTAGACACCGGTACATCTTTGAGCTGAAGGCGGTGA      |
| P127-6  | PY04034 | H2-Kd | KYNNNSIRNI       | 11.95 | LCDYKYNNSIRNIRML*                                     | CTTTGTGATTATAAGTATAATAATAGCATAAAGAACATAAAGATGCTGCTCTTGA      |
| P127-7  | PY04034 | H2-Kd | IYMDYDTWL        | 19.56 | PDGVIMYMDYDTWLDDVE*                                   | CCTGACGGCGTAATCTACATGGACTATGACACCTGGCTAGTAGTGAAGTGAATGA      |
| P127-8  | PY04034 | H2-Kd | SYGNFSNYI        | 20.53 | PTLSSYGNFSNYISHIS*                                    | CCAAACCTGTCTAGCTACGGTAACTTTAGTAACTACATCTCTCATATCTCTGTA       |
| P127-9  | PY04034 | H2-Kd | SYANLKPKI        | 24.81 | LSKFSYANLKPKIRIYVKS*                                  | CTCTCTAAGTTTACGTACGCTAACCTGAAGCCTAAGATCCGCGTGCATAGCTGA       |
| P127-10 | PY04034 | H2-Kd | IMFNNFQNI        | 30.5  | QRSDIMFNNFNILKXG*                                     | CAACGATCTGATATAATGTTTATAAATCTCCAGACACTCTCTGTAAGAAGTGA        |
| P128-1  | PY04034 | H2-Kd | NYIGTRNNL        | 44.4  | ELYSNYIGTRNNLPVFI*                                    | GAGCTATATAGTAACTACATAGGCAGCTAGAAATAACCTGCCAGTGTATTTTGA       |
| P128-2  | PY04034 | H2-Ld | FPFVNPVLL        | 23.56 | VQCTFPFVNPVLLKALW*                                    | GTGTGCCAGACTTTCCCTTTCGTGAACCCCTGTGCTGCTGAAGGCCCTTGGTGA       |
| P128-3  | PY04051 | H2-Kd | KYLRAPIYI        | 7.91  | ATAAGTGAACATAAAGTAACTGAGAGCCCTGCCATACATGAAAGGAAGTTTGA |                                                              |
| P128-4  | PY04051 | H2-Kd | SYEKTQSSL        | 20.52 | QRDASYEKTQSSLSDD*                                     | CAGCGTGACGCTAGCTATGAGAAGACCCAGAGTAGCCTGTCTTCTGACGGATGA       |
| P128-5  | PY04051 | H2-Kd | SYVKQLPPL        | 25.62 | RNMKSYVKQLPPLPEN*                                     | CGTAATATGAAGAGCTACGTGAAGCAGCTGCCCTCTCTAGAACATTAAGGCTGA       |
| P128-6  | PY04058 | H2-Kd | QYIFSFRSL        | 34.05 | YKVLYQIFSFRSLNSTA*                                    | TATAAAGTCTTGACGTACATCTTTAGCTTTAGAAGCCTGAATAGCACAGCCTGA       |
| P128-7  | PY04062 | H2-Kd | KYLKLHNKI        | 10.35 | GATRKYLKLHNKIVERN*                                    | GGCGCCACTAGGAAGTACCTGAAGCTGCATATAAGATAGTGAAGTGAAGTGA         |
| P128-8  | PY04062 | H2-Kd | WYFIKTSSI        | 10.46 | ICNRWYFIKTSSILTFD*                                    | ATCTGTAACCGCTGGTACTTCTATAAAGACTAGTAGCATCCTAAGTGAATTTGA       |
| P128-9  | PY04065 | H2-Kd | KYFKSLLHI        | 4.17  | LLLFKYFKSLLHICEAA*                                    | TTACTATTGTTTAACTACTTAAAGACCTGCTGCACATCTGTGAAGCCCGCTGA        |
| P128-10 | PY04081 | H2-Kd | KFINVVNYI        | 9.48  | ARWYKFINVVNYIYERMS*                                   | GGCGCTGGTATAAGTTTATAAAGCTAGTAAAGTACATAGAAAGGATTCCTCTGA       |
| P129-1  | PY04081 | H2-Kd | KYEQTRMSI        | 11.52 | LLUYKYEQTRMSIRFRK*                                    | CTTCTAATCTATAAGTATGAGCAGACTAGAATGAGCATAAAGGTTTGAAGAAGTGA     |
| P129-2  | PY04081 | H2-Kd | SYNIKELI         | 20.3  | NVDASYNIKELIGIVAS*                                    | AATGTAGATGCTAGCTACCTGAACATAAAGAGAGCTGATAGGCGTAGCCCTGCTGA     |
| P129-3  | PY04081 | H2-Kd | HYVEAESEI        | 20.91 | LTNLHYVEAESEILADP*                                    | CTGACTAACCTGCACTACGTAGAGGCTGAGAGTGAGATCCTAGCTGATTTTTGA       |
| P129-4  | PY04097 | H2-Kd | KYFSSLSQF        | 17.28 | ETTGGKYFSSLSQFOLQ*                                    | GAGACCCACAGTAAAGTACTTTTATAGCCTTGAGCCAGTTCAGCTGCAAAAATGA      |
| P129-5  | PY04097 | H2-Kd | IYLENKMFL        | 36.97 | EVFRIYLENKMFLCNLV*                                    | GAGGTTTTTAGGTACTACCTAGAGAATAAGATGTTTCTGTGTAATCTAGTATGA       |
| P129-6  | PY04097 | H2-Kd | EYISVVSRI        | 47.18 | ATTSEIYISVVSRIWSFI*                                   | GCCACGACATCTGAGTACATAAAGCGTAGTGAGTGAAGTGAAGTGAAGTGAAGTGA     |
| P129-7  | PY04100 | H2-Kd | IYQNSVSFI        | 8.53  | MCDNIYQNSVFISESF*                                     | ATGTGTGATAATCTACCAGAACATGAGCGTGTTCATAAAGTGAAGTGAAGTGA        |
| P129-8  | PY04100 | H2-Kd | FYINPKYII        | 9.99  | GGSKFYINPKYIITFKR*                                    | GGCGGATCAAGTTCTACATAAACCCCTAAGTACATAAATCAATTTAAACGCTTGA      |
| P129-9  | PY04100 | H2-Kd | MYNAENSKI        | 23.39 | GVIPMYNAENSKIGNQS*                                    | GGAGTAAATCCCAATGTATAACGCTGAGAATAAGTAAAGTAAAGTAAAGTAAAGTGA    |
| P129-10 | PY04100 | H2-Kd | KYLIYSDSL        | 27.03 | GRENKYLIYSDSLILDV*                                    | GGGCGTGAAAATAAGTACCTGATCTATGATGATAGCCTGCTTTTATGATGATTGA      |
| P130-1  | PY04103 | H2-Kd | KYILKQCKI        | 5.65  | LSRVKYILKQCKILRPY*                                    | CTGAGCCGCGTGGAAGTACATAAAGCTGTGCCAGAAGATCTAGGCGCCCATATTGA     |
| P130-2  | PY04103 | H2-Kd | KYIYDKYNI        | 6.21  | KFRGKYIYDKYNILESY*                                    | AAGTTTGAAGGTAAGTACATCTATGATAAGTATAAAGTACCTAGAGAGCTATTGA      |
| P130-3  | PY04103 | H2-Kd | YIISFSVI         | 24.62 | SMSRGYIISFSVIGSGE*                                    | TCCATGTCTAGGGGCTACATAATAAGTACTTCTGATCTAGCTCAGGGGCTGAGTGA     |
| P130-4  | PY04146 | H2-Kd | YFYFLYDTI        | 3.51  | VAHSYFYFLYDTIVIFI*                                    | GTAGCTCATAGTTACTACTTCTACCTGTATGACACCATAGATGATAGTAAATTTGA     |
| P130-5  | PY04146 | H2-Kd | KYNSVKNKI        | 9.3   | SSPYKNSVKNKIGLDN*                                     | AGTTCCCTCTGAAGTATAAAGCGTGAAGAATAAGTAAAGTAAAGTAAAGTAAAGTGA    |
| P130-6  | PY04173 | H2-Kd | TYNEMYNHI        | 5.04  | YMGNTYNYEMYNHIQIMC*                                   | TACATGGGTAATACCTATAATGAGATGTATAACCACATCCAAATAATGTGTTGA       |
| P130-7  | PY04173 | H2-Kd | KYIGILLEL        | 20.1  | GLYSKYIGILLELLETL*                                    | GGTCTTACTCTAAGTACTACGGCATCTCCTGCTAGAGCTGCTAAGCCCTGTTTGA      |
| P130-8  | PY04173 | H2-Kd | KMMNNFQL         | 41.4  | SQRAKMNNNFQLPLG*                                      | TCACAGCGTGCTAAGATGATAAATAAATCACTTCCAGCTGACCGGCTAGGATGA       |
| P130-9  | PY04181 | H2-Kd | WYFWDKYVI        | 32.1  | LFIIYWYFWDKYVIGGSF*                                   | CTGTTTATAATCTACTGGTTCTATGATAAGTACTACATAGGTTGGGTCCTTTTGA      |
| P130-10 | PY04181 | H2-Ld | YPIYVYFFF        | 27    | KSELYPIYVYFFFYVWL*                                    | AAAAGTGAAGCTTACCTCTTACTACTTCTTCTTCTTCTTCTTCTTCTTCTTCTGA      |
| P131-1  | PY04194 | H2-Kd | KYWSTVIDI        | 27.84 | VAFKYVSTVIDIVILFP*                                    | GTAGCTTTTAAAAAGTACTGAGGACCCGCTGATAGACATAGTTTCTTCTCCCGTGA     |
| P131-2  | PY04199 | H2-Kd | GYPNFDIT         | 3.15  | NAIPGYYPNFDITWFTA*                                    | AACGCAATCCCGGGCTACTTCCCTAACTTTGACACCATGCTTGGTGCACAGCTGA      |
| P131-3  | PY04199 | H2-Kd | YYQNNVNFI        | 4.84  | EQEFYQNNVNFIPLSPYT*                                   | GAACAGGAATTTTACTACCAGAATAACGTGAACCTTCTGTCTCCATACACATGA       |
| P131-4  | PY04199 | H2-Kd | CYLSNSYETL       | 10.74 | CRSKYCYLSNSYETLCRT*                                   | TGTAGGTCTAAGTGCTACCTGAATGCTATGAGCCCTGTGTAAGACCCCTGA          |
| P131-5  | PY04199 | H2-Kd | LYLCSGEHI        | 21.2  | FNPVLYLCSGEHIVGDE*                                    | TTTAATCCTGATCTACCTGTGCGGTAGTGAGCAGCATGTGAGGTGAGGAAGTGA       |
| P131-6  | PY04199 | H2-Kd | KYLNVSSEIL       | 33.1  | ALKFRYLNVSSEILVRLO*                                   | GCCCTGAAGTTTATGATACCTGAACGTGAGTGAGATCTAGTCTGACAGCATGA        |
| P131-7  | PY04214 | H2-Kd | RYENNELNI        | 8.99  | FGGTYRYENNELNITKPH*                                   | TTTGGGGGCACTAAGTACTATGAGAATGAGCTGAGCATAGTAAAGTAAAGTAAAGTGA   |
| P131-8  | PY04242 | H2-Kd | IYYTARFPL        | 16.26 | RIFNIYYTARFPLQLKL*                                    | CGAATCTTAAACATCTACTACACCGCTAGATTCCCTCTGACGGGCTTGAAGTGA       |
| P131-9  | PY04242 | H2-Kd | YYTARFPLI        | 16.83 | DLSDIYYTARFPLIVFYD*                                   | GATCTGTCTGAACCTACTACACCGCTAGATTCCCTCTGATAGTTTATGACTGTA       |

|         |         |       |              |       |                      |                                                             |
|---------|---------|-------|--------------|-------|----------------------|-------------------------------------------------------------|
| P131-10 | PY04242 | H2-Kd | YYKQFSNQI    | 26.04 | RDSAYYKQFSNQITETM*   | CGTGATAGCGCTTACTATAAGCAGTTTGTAAACCAGATAAAGTAAACGATGTGA      |
| P132-1  | PY04244 | H2-Kd | CYYFYRTAL    | 8.98  | AITCEYYFYRTALRVNQ*   | GCTATAACTGAGTGCTACTACTTCTATAGAACCCTGCGGCTGGAATCAATGA        |
| P132-2  | PY04250 | H2-Kd | MYINNNEFI    | 3.53  | SIVAMYINNNEFIDVLP*   | TCTATAGTAGCAATGTACATAAAATAACTTTGATAGTAGACCCCTCCAGTGA        |
| P132-3  | PY04257 | H2-Kd | KYSDYFYNI    | 12.07 | LEAEKYSDFYNYINMAMR*  | CTAGAGGCTGAAAGATAGTGACTCTCTTATAAACATAATGGCAATGCGTTGA        |
| P132-4  | PY04257 | H2-Kd | IYNNKDIPI    | 31.69 | RVPRIYNNKDIPIYWKV*   | CGCGTACCTCGAATCTATAATAAGGACATCCCTTACATAAATTTGGAAGGTGTGA     |
| P132-5  | PY04260 | H2-Kd | LYYVNERTI    | 48.81 | LLGNLYYVNERTIIDVD*   | CTACTAGGTAATCTGTAAGTACGTGAATGAGAGAACCATAGATGTAGATAGTTGA     |
| P132-6  | PY04273 | H2-Kd | SFIANTNHI    | 10.34 | QQLASFIANTNHIPIVAM*  | GGGCGAGCTAGCTAGCTTATAGCTAACACATAACCCATCCCTGTAGCTTACTGA      |
| P132-7  | PY04273 | H2-Kd | KYSNTAIFL    | 24.22 | IELSKYSNTAIFLPIFML*  | ATAGAAGCTGAGTAAGTATAGTAACACCGCCATCCCTGCTGCCCTTACGTGATGA     |
| P132-8  | PY04273 | H2-Kd | KYALYRDYL    | 36.82 | FWHMKYALYRDYLLPMG*   | TTTTGGCATATGAAGTACGCCCTGTATAGAGACTACCTGCTGCCCATGGGGTGA      |
| P132-9  | PY04273 | H2-Ld | FPYLLRHSF    | 22.31 | FPKHFPYLLRHSFYVLL*   | TTCCCTAAGCATTTTCCCTTACCTGCTGAGACATAGCTTCTACGTGCTGCTGTGA     |
| P132-10 | PY04302 | H2-Kd | KYFAGFFTL    | 2.74  | TNDGKYFAGFFTLTHCG*   | ACTAATGACGGTAAGTACTTCCGCCGCTTCTTACCCTGACCCATTGCGGGTGA       |
| P133-1  | PY04302 | H2-Kd | YYNYS DYLI   | 8.66  | ELFYVYNNYS DYLIUNWR* | GAGCTGTTTGTGACTATAAATACTATAGTGAACCTACTGATAGGTAATGGAAGTGA    |
| P133-2  | PY04302 | H2-Kd | SYLRAGANI    | 9.61  | ARGLSYLRAGANIYHDN*   | GCTAGAGGATTAAGCTACCTGAGAGCGCGGCTAACATCTATCATGATAATTGA       |
| P133-3  | PY04302 | H2-Kd | NYFQYLFNI    | 9.83  | SPRVNYFQYLFNITDES*   | TCTCCACGAGTGAAGTACTTCCAGTACCTGTTTAAACATAAAGTATGAGTCTTGA     |
| P133-4  | PY04302 | H2-Kd | KYSLQNKYAV   | 21.95 | AGPRSYLQNKYAVNKAI*   | GCAGGCCCCCGTAGCTACCTGCAGAAATAAGTACGCCGTGAATAAGGCTACTCTGA    |
| P133-5  | PY04302 | H2-Kd | KYSLNNANI    | 24.79 | ATDKKYSLLNANIGHAQ*   | GCGACTGATAAGAAAGTATAGCCTGAATAACCGTAAACATAGGCTAGGCCAGTGA     |
| P133-6  | PY04302 | H2-Kd | KYNNNYS DYLI | 28.37 | NITKNYNNYS DYLITSEL* | AACATAAATAAAAACTACTATAAATACTATAGTACCTAGCATCTGAGATTATGA      |
| P133-7  | PY04302 | H2-Kd | KYVYLRLLI    | 29.71 | ADQIKYVYLRLLIILIR*   | GCTGACCAGATAAAGTACGTGTAAGTACGATGATAATCCTGATAATCCGCTGA       |
| P133-8  | PY04302 | H2-Kd | FYLLDIIRE    | 39.08 | PASEFYLLDIIREYLVYG*  | CCCGCCTCTGAGTTCTACCTAGACATAATAAGAGAGATCTTATTGATAGGCTGA      |
| P133-9  | PY04302 | H2-Kd | IYQNTITENL   | 41.05 | TDVTIYQNTITENLQIGP*  | ACTGACGTAACCATCTACCCAGAACATAAAGTGAACCTGCAAAATAGGACCCCTGA    |
| P133-10 | PY04302 | H2-Ld | VPYANFNDL    | 27.4  | YTCFVPYANFNDLPLP*    | TATACCTGTTTTCGTGCTTACGCTTAACCTTAAAGTACCTGCCCTTCTCTTGA       |
| P134-1  | PY04318 | H2-Kd | KYISTIKSL    | 7.24  | VNKTKYISTIKSLLLID*   | GTGAATAAGACTAAGTACATAAGCACCATTAAGAGCCGCTCCTCTGATAGACTGA     |
| P134-2  | PY04318 | H2-Kd | NYNNLANLI    | 21.83 | SKEANYNNLANLIKRKL*   | TCTAAAGAGCTAAGTACTATAAAGTACCTGATTAAGAGCGTAAATATGTA          |
| P134-3  | PY04318 | H2-Kd | HYIVKGEHI    | 42.03 | GNRGKYIVKGEHIGRAK*   | GGTAATAGAGGGCACTACATAGTGAAGGGTACAGCATAGGCTGCTGAAGTGA        |
| P134-4  | PY04318 | H2-Kd | KYIVKGEHI    | 42.03 | GIQFHYIVKGEHICHTC*   | GGCATTGAGTTTCACTACATAGTGAAGGTAGAGACATCCATTGTACTGAGTGA       |
| P134-5  | PY04324 | H2-Kd | IYNDIDTFL    | 30.35 | QQVLIYNDIDTFLCCFV*   | CAGCAGGCTCTTAATCTATAAGTACATAGACATGCTTCTGCTGTTTTCGTCTGA      |
| P134-6  | PY04330 | H2-Kd | SYTYSVNI     | 26.75 | SSKWSYTYYSVNIAGTIR*  | TCCCTAAGTGGAGCTACACCTACCATAGCGTGAACATAGCAGGAGCCCGCTGA       |
| P134-7  | PY04338 | H2-Kd | SYFFVDTHL    | 6.03  | LGNRSYFFVDTHLDTMP*   | CTAGGTAACCGTACGTACTTCTTCTGCTGACTGACCCATAGCATACCCCATGTGA     |
| P134-8  | PY04338 | H2-Kd | KFFDYGYI     | 40.33 | QAQSKFFDYGYIYLGPL*   | CAAGCACAGAGTAAGTCTTTGACTACGCTACTACATCTAGTCTCCTCTGA          |
| P134-9  | PY04338 | H2-Kd | YYLMSIGLL    | 42.56 | ESDQYYLMSIGLLPLGD*   | GAGTCTGATCAGTACTACCTGATGAGCATAGGCTGCTGCTCCTTAGGTGATGA       |
| P134-10 | PY04343 | H2-Kd | KYIRNMFEV    | 19.18 | SSAWKYIRNMFEVKQEE*   | TCTATCGGCTGGAAGTACATAAGAAACATGTTTGAGGTGAAGCAGGAGGAGTGA      |
| P135-1  | PY04357 | H2-Kd | KYINVINML    | 4.77  | RVVGKYINVINMLGLLG*   | CGGGTAGTAGGTAAGTACATAAAGCTGATAATGAACCTAGGCGCTTTAGGATGA      |
| P135-2  | PY04357 | H2-Kd | SYMDDKLEI    | 15.3  | FAYPSYMDKLEIGMFS*    | TTTGCACTCCCTAGCTACATGGACCAAGATAGAGATAGGATGTTTAGCTGA         |
| P135-3  | PY04357 | H2-Kd | QYVNVNML     | 31.97 | GASPOYVNVNMLPQHGL    | GGCGCTAGCCCCAGTACGTGAACGCTGATGAACCCCTGTCGACAGCCGCTCTGA      |
| P135-4  | PY04357 | H2-Kd | KYSIYSDNI    | 41.43 | GLLCKYSIYSDNIFGN*    | GGCTTACTGTGAAGTATAGCATCTATAGTACATAGCATCTTACCGGTAATTGA       |
| P135-5  | PY04385 | H2-Ld | LPQLGRFTL    | 48.13 | GCLEPLQLGRFTLLDPR*   | GGATGCCTAGAGCTGCCCTAGCTAGGTAGATTACCCCTGCTAGATCCCGCTGA       |
| P135-6  | PY04387 | H2-Kd | IYQIKINTI    | 18.37 | VEKKIYQIKINTIYKVS*   | GTAGAGAAAAAATCTACCAGACTAAGATAAACACATCAAAAGGTTCTTTTGA        |
| P135-7  | PY04387 | H2-Kd | GYQKMLTPM    | 22.48 | AKNDGYQKMLTPMQGVR*   | GCTAAAAATGACGGCTACCAGAAAGTCTGACCCCTATGACGAGGGGTGAGGTGA      |
| P135-8  | PY04387 | H2-Kd | NYSSLYTYI    | 26.08 | QFDRNYSSLYTYIQDAG*   | CAATTGTAGTCGTAACATAGTAGCCCTGACCTACACCATCCAGAGTCTGGATGA      |
| P135-9  | PY04387 | H2-Ld | LPYINPYLM    | 14.33 | DVDGLPYINPYLMGFKQ*   | GATGTAGATGGGCTGCCCTACTATAAACCCCTACCTGATGAGGTTTAAAGCAAGTGA   |
| P135-10 | PY04390 | H2-Kd | SYLGLYFSI    | 4.51  | YPESSYLGLYFISFGS*    | TACCCTGAGTCTAGCTACCTAGGCTGTACTTTAGCATCTTTGGATCTGGATGA       |
| P136-1  | PY04390 | H2-Kd | KYLYMKNNKL   | 13.46 | SQSGKYLYMKNNKLNNI*   | AGCCAGTCAAGTAAGTACCTGTACATGAAGAATAAGCTGCCTAATAATATCTGA      |
| P136-2  | PY04390 | H2-Kd | YYIFRINLL    | 13.87 | LLLTYYIFRINLLLVG*    | CTGCTTCAACCTACTACATCTTTAGAATAAACCTGCTGCTAGTAGTAGGATGA       |
| P136-3  | PY04390 | H2-Kd | KYIYLAELI    | 22.83 | RWFFKYIYLAELIESQW*   | CGGTGGTTCTTTAAGTACATCTACCTAGCTGAGATCTACAGGTCCCAAGTGGTGA     |
| P136-4  | PY04437 | H2-Kd | RYFNDKTI     | 4.2   | QFKKRYFNDKTIICGNE*   | CAGTTTAAAGAGAGATACTTTAATGATAAGACCATAACTCTGGTGAATGAGTGA      |
| P136-5  | PY04437 | H2-Kd | YYFGSKDNI    | 4.95  | AMSKYIYFGSKDNITSDM*  | GCTATGCTAAGTACTACTTCCGTAGTAAGGATAACATAAAGTATGATATGTGA       |
| P136-6  | PY04437 | H2-Kd | SYLKNAPI     | 5.38  | TSFVSYLKNAPIISVD*    | ACTAGCTTTGTGAGCTACCTGAAGACGCCCTATAATAGTGTAGAGCAAGTGA        |
| P136-7  | PY04437 | H2-Kd | KYIPLSLAYM   | 6.74  | GNFRKYIPLSLAYMALED*  | GGTAATTTTAAAGAGTACATCCCTAGCCTAGCCTACATGGCCCTAGAGCAAGTGA     |
| P136-8  | PY04437 | H2-Kd | SYIHKNNNI    | 14.48 | FEHTSYIHKNNIRKVS*    | TTTGAACACACTAGCTACATCCATAAGAAAGATAACCTAAGGAAAGTGTCTGA       |
| P136-9  | PY04437 | H2-Kd | KYKKYKNEE    | 18.15 | TEVEKYKKYKNEIEQVF*   | ACTGAAGTAGAGAAGTACTATAAGAAAGATGAGGAGATCCAGGAGGTAGGATGA      |
| P136-10 | PY04437 | H2-Kd | AYMTNSYHV    | 43    | FYAQAYMTNSYHVQDRF*   | TTCTACGCCCCAGGCTACATGACTAATAGCTACCAAGCTGCGAGGATAGGTTCTGA    |
| P137-1  | PY04445 | H2-Kd | IYFYEQNI     | 19.25 | SPTLIYFYEQNIFKCF*    | AGTCCAACACTAGCTACTTTAAGTATGAGCAGAACATCTTTAAGTGCTTTTGA       |
| P137-2  | PY04447 | H2-Kd | HYFKSNTYM    | 18.85 | EDPLHYFKSNTYMEIKS*   | GAAGATCCTTTGCACTACTTTAAGAGTAACACCTACATGAGGATAGCTCCTGA       |
| P137-3  | PY04447 | H2-Kd | IYNEYDSNI    | 21.72 | PSTEIYNEYDSNIFVNO*   | CCTAGCACTGAAATCTATAATGAGTATGATAGTAACATCTTCTGTGAACCACTGA     |
| P137-4  | PY04459 | H2-Kd | YYMFLQHNL    | 5.69  | PSVTYIYMFLQHNLRPS*   | CCTTTCAGTAACATACATGTCTGCTGAGTAAACCTGAGACCTAGCCGCTGTA        |
| P137-5  | PY04459 | H2-Kd | KYILYYSNI    | 6.81  | YSNYKYIYYSNIRLMS*    | TACTCTAACTATAAGTACATAATCTCTGTATAGTAACATAAGGCTGATGGGATGA     |
| P137-6  | PY04459 | H2-Kd | FYNWTIIGI    | 13.73 | RASLFYNWTIIGIDILL*   | CGGGCTAGCCTGTTCTATAAAGTGAACCATATAGGCATAGATGACATTCTGTGA      |
| P137-7  | PY04459 | H2-Kd | LYYYKHSSI    | 14.59 | FEELWLYYYKHSSIFGLI*  | TTTGAAGAGTGGCTGTACTACTATAAGCATATAGCATCTTCTCGGACTACATCTGA    |
| P137-8  | PY04459 | H2-Kd | SYKNNDSYL    | 19.52 | KKGTSYKNNDSYLLFPR*   | AAAAAGGGGACTAGCTATAAGAAATAATGATAGCTACCTGTTGTTTCTAGATGA      |
| P137-9  | PY04459 | H2-Kd | KYIHKNTNLL   | 18.8  | PAGMKYIHKNTNLLSIES*  | CTCGTGGCATGAAGTATAAGCACGGCACTAACCTGCTGAGCATAGAGGCTGA        |
| P137-10 | PY04459 | H2-Kd | RYLNEKETI    | 20.41 | NSADRYLNEKETIDHSQ*   | AATTCTGCTGATAGTACCTGAATGAGAAGGAGACCATAGACATCTCTCAATGA       |
| P138-1  | PY04459 | H2-Kd | SYKNDITVY    | 29.74 | TKVQSYKNDITVYHDHE*   | ACTAAGGTTCAAAGCTACATAAAGAACACTGACTACCTGATCATGATCAATGA       |
| P138-2  | PY04459 | H2-Kd | TYIFDKNYL    | 30.65 | NCGDYTYIFDKNYLYGK*   | AAGTGGGCTGACACCTACATCTTTGATAAGAACTACCTGACCTACGGTAAATGA      |
| P138-3  | PY04459 | H2-Kd | SYLGYRLIL    | 38.74 | ILVGSYLYGYRLILKAEK*  | ATTCTAGTAGGTAGCTACCTAGGCTATAGACTGATCTCGAAGGCTGAGAAGTGA      |
| P138-4  | PY04459 | H2-Kd | SYLQINQAFI   | 40.47 | KSRSYSYLQINQAFLEFOS* | AAATCTAAGAGGAGCTATAGCATATAACCAAGGCTCTCTAGATGTCCAAAGCTGA     |
| P138-5  | PY04474 | H2-Kd | LYNIVTHNI    | 29.24 | NSQLLYNIVTHNIKWVIA*  | AATAGTCAAGTCTGCTATAAATAGTACCATATAAAGGTGTGGGCGCTGA           |
| P138-6  | PY04474 | H2-Kd | KFASRLWHI    | 48.52 | SSILKFASRLWHIEQLI*   | TCTATCTATTCTGAAGTTCGCTAGTAGACTGTGGCAGCATAGGACGATGCTGTGA     |
| P138-7  | PY04495 | H2-Kd | KFISINNNI    | 33.74 | SRGKKFISINNNIIDLGI*  | AGTAGGGGTAAAGAGTTCTAAGCATATAATAAATACATCTTATAGTGGGATCTGA     |
| P138-8  | PY04496 | H2-Kd | KYISNTSGFL   | 14.38 | LKLAKYISNTSGFLQHYT*  | CTGAAGCTAGCTAAGTACATGATAAAGTACGCTTCTGCGACATACACATCTGA       |
| P138-9  | PY04499 | H2-Kd | YYQAMSNLI    | 2.8   | WQETYYQAMSNLIAYDK*   | TGGCAGGAGACTTACTACCAGGCCATGATGAACCTGATAGCCTTATGATAAGTGA     |
| P138-10 | PY04499 | H2-Kd | KYIKIPLTI    | 4.58  | TVPAKYIKIPLTIREPC*   | ACGGTCTCCTGCTAAGTACATAAAGTCCCTCTGACCATCCGTGAGCCTTGTGA       |
| P139-1  | PY04499 | H2-Kd | RYIEFQCLYL   | 7.15  | TLRGYRYIEFQCLYLDQL*  | TLRGYRYIEFQCLYLDQL*                                         |
| P139-2  | PY04499 | H2-Kd | KYNNHQNGI    | 8.03  | RDEKEYYNNHQNGLMGFF*  | AGAGATAAGGAAAAAGTACTATAACCCACCAAGACCGCCTGATGGGCGCGGCTGA     |
| P139-3  | PY04499 | H2-Kd | HYNFVYQNI    | 18.04 | EFSQHYNFVYQNIKFLSE*  | GAATTTCTCAGCACTATAACTCTGCTGATATAAAGATCTTCTCTCTGTAATGA       |
| P139-4  | PY04499 | H2-Kd | KYMDKYFVS    | 23.52 | SNGYKYMDKYFVSYSATI*  | AGTAACGGATATAAGTACATGGATAAGTACTTTAGCGTGAGCGCAACCATCTGA      |
| P139-5  | PY04499 | H2-Kd | KYILLEVDI    | 45.64 | HLPPKYILLEVDITPLQ*   | CATCTCCCGCCTAAGTACATCTGCTAGAGGACGCTGATAACCCCTCTCCAGTGA      |
| P139-6  | PY04499 | H2-Kd | SPNNKSNII    | 46.02 | GLESSYNNKSNIIIGEN*   | GGCCTAGAGAGTAGCTATAAAGAAAGATAACATAATAGCTATAGTAAGAGACTGA     |
| P139-7  | PY04499 | H2-Ld | SPNNEFHTF    | 41.65 | RDIDSPNNEFHTFTSQM*   | CGTGATATAGATAGCCCTAATAAGTAGTTCCACACCTACCTAGCATAGGAGTGTGA    |
| P139-8  | PY04500 | H2-Kd | KYLEEKYSI    | 10.41 | GLPLKYLEEKYSISYDV*   | GGATTGCCCTTGAAGTACCTAGAGGAGAAGTATAGCATAGCTATGATGTATGA       |
| P139-9  | PY04507 | H2-Kd | KYNIRTLPI    | 29.15 | PLPGKYNIRTLPIRTAE*   | CCATTGCCAGGTAAGTATAACATAAAGAACCCCTGCCTATCCGACCCGCTGAATGA    |
| P139-10 | PY04546 | H2-Kd | KYIEFCLYL    | 22.46 | GGGGCTGGTTT          | GAGGCTGGTTT                                                 |
| P140-1  | PY04546 | H2-Kd | NIYSIDYFI    | 28.79 | PQVNTIYSIDYFILHVF*   | CCACAAGTGACTAACTACATAAGCATAGACTACTTCTATCTTACATGCTTCTCTGA    |
| P140-2  | PY04551 | H2-Kd | KWYQMLHSI    | 4.83  | AHALKWYQMLHSIEAYT*   | GCCCATGCTTTTGAAGTGGTACCAAGTATGCTGACATAGCATAGGAGCTTAACTCTGA  |
| P140-3  | PY04605 | H2-Kd | KYYPDFTSV    | 5.48  | KNISKYYPDFTSVQQCL*   | AAAAACATATCTAAGTACTACCTGACTTCACTAGGCTGACGACAAAGTCTGTGA      |
| P140-4  | PY04605 | H2-Kd | KYVFVSTGL    | 6.67  | VKPLKYVFVSTGLVKGS*   | GTGAAGCCCTTGAAGTACTTCTGAGGACCGGCTTCTGAGTGAAGGGGCTCCTGA      |
| P140-5  | PY04610 | H2-Kd | LYGPTQTTI    | 8.46  | MDLEYGPTQTTITLKL*    | ATGGATTITAGAACTGTACGGCCCTACCCAGACCCACCAACTCTGAAACTCTGA      |
| P140-6  | PY04610 | H2-Kd | NYNNKLEI     | 13.42 | RRRENNYNNKLEIPIE*    | CGTAGGAGGAGAACTACATAAATAAAGCTAGAGATAGAGCCCTAAGATGTGA        |
| P140-7  | PY04610 | H2-Kd | SMINNNSMI    | 17.25 | VKEPSMINNNSMILPES*   | GTGAAGAGGCTAGCATGATAAATAAATAGCATGATCCTGCCTGAGAGCTGA         |
| P140-8  | PY04610 | H2-Kd | SMINNNSMI    | 17.25 | KSASFMINNNSMIACLY*   | AAGTCTGCTTTTAGCATGATAAATAAATAGCATGATAGCCTGTCTCTACTGA        |
| P140-9  | PY04610 | H2-Kd | YYQKILVII    | 17.27 | YLVYVYQKILVIIKECE*   | TATCTAGTCTATTACTACCAGAAAGTCTCGATGATATAAAGAAATGTAGTGA        |
| P140-10 | PY04610 | H2-Kd | SMINNNSLI    | 18.42 | TVIGSMINNNSLIJALQ*   | ACGGTAATAGGTAGCATGATAAATAAATAGCCTGATAGCCCTGCAACTATGA        |
| P141-1  | PY04610 | H2-Kd | SMINNNSMI    | 26.41 | LNAYSMINNNSMIGPIM*   | CTGAACGCTTATAGCATGATAAATAAATAAGCATGATAGGACCAATAATGTGA       |
| P141-2  | PY04648 | H2-Kd | YYLYYLQVI    | 25.6  | DKGALYYLYYLQVIQMYL*  | GATAAAGGCGCTCTGTACTACTACTACGCTGACAGGTGATCCCAATGATCTCTGA     |
| P141-3  | PY04648 | H2-Kd | YQKYIFYI     | 46.69 | ETYSYQKYIFYILKKGH*   | GAGACGTACTCCTACCAAGCTGAAGTACATCTTCTACTGATAAGGAGGACTTGA      |
| P141-4  | PY04652 | H2-Kd | YYYSKRGII    | 46.74 | MCLWYYYSKRGIIIMGG*   | ATGTGCTTTGGTACTACTATAGTAAGAGAGGCATAATAGGCATGGGAGGCTGA       |
| P141-5  | PY04657 | H2-Kd | AYSPLISRL    | 25.71 | AGQIAYSPLISRLVLMQ*   | GCAGGGCAGATAGCCTATAGCCCTCTGATAAGTAGACTAGTAATGCTGCAGTGA      |
| P141-6  | PY04670 | H2-Kd | KYVSYSTSI    | 9.47  | EQIAYGYSYVSYSTSIQSP* | GAATACGCGCTGGGGCTATAGCTACGTGAGCACTAGCATGACCTCAATCCACCCGCTGA |
| P141-7  | PY04670 | H2-Kd | KYNNNSVQL    | 11.3  | MYIEKYNNNSVQLQEQY*   | ATGTACATAGAGAAGTATAAATAAGCATAGGCTGCAGCTGCAAGGACCAATATGTA    |
| P141-8  | PY04670 | H2-Kd | KHFAMHSTL    | 19.27 | QYCYKHFMHSTLFLVLA*   | CAGTACTGTTATAAGCACTTCCGATGACCTGACCTGCTGCTAGTACCATGA         |
| P141-9  | PY04670 | H2-Kd | FYISSLKNLI   | 19.47 | FWYFYISSLKNLIILGF*   | TTTTGGTATCCATTCTACATAAGTACGCTGAAGAACCTGCTGATAAGGTTCTGA      |
| P141-10 | PY04670 | H2-Kd | IYLCYSNFL    | 46.82 | GNVWYIYLCYSNFLDRG*   | GNTAAGTGTGGATCTACCTGTGCTATAGTAACTCTGATAGATAGGGGCTGA         |

|         |         |       |                   |       |                                                        |                                                          |
|---------|---------|-------|-------------------|-------|--------------------------------------------------------|----------------------------------------------------------|
| P142-1  | PY04689 | H2-Kd | KYKDTTNSI         | 9.73  | GAGQKYKDDTNSIQPTQ*                                     | GGGGCAGGGCAGAAGTATAAGGACACCCTAATAGCATCCAACCGACTCAGTGA    |
| P142-2  | PY04689 | H2-Kd | FYVDNDSEI         | 16.44 | PPAKFYVDNDSEICKGP*                                     | CCTCCTGCTAAGTTCTACGTAGATAATGATGAGATGCTAAGGGAGCCATGA      |
| P142-3  | PY04691 | H2-Kd | YYSHIESVI         | 7.09  | AVGLYSHIESVIDSLG*                                      | GCCGTATAGCCCTACTATAGCCACATAGAGAGCGGTATAGATTCTCTAGATGA    |
| P142-4  | PY04691 | H2-Kd | KYIKKONLI         | 10.34 | PPSEKYIKKONLITVME*                                     | CCCCCTAGTGAGAAGTACATAAAGAAGCAGAACCTGATAACCGGTGATGGAGTGA  |
| P142-5  | PY04691 | H2-Kd | NYGTNTNSTI        | 21.37 | LSAYNYGTNTNSTIEGSD*                                    | CTGTGACGTTATAACTACGGCACCACCTAATAGCACCATAGAAGGTTCTGATTGA  |
| P142-6  | PY04734 | H2-Kd | TFIRSCQYI         | 40.7  | TERVTFIRSCQYIHGE*                                      | ACTGAACCGGTGACCTTCATAAGAAGCGTGCAGTACATATAACACGGTGAATGA   |
| P142-7  | PY04750 | H2-Kd | YYPYLYNII         | 3.68  | GSTVYYYLYNIIIVREH*                                     | GGCTCTACAGTGTACTACTACCCCTGTGATAACATAATGTCGCTGAACACCTGA   |
| P142-8  | PY04750 | H2-Kd | YITMLMARI         | 4.22  | WAESIYITMLMARIISLY*                                    | TGGGCTGAGAGTATCTACATAACCATGCTGCATAGCAATCTCTCTCTTTATTGA   |
| P142-9  | PY04750 | H2-Kd | KYLGKICTI         | 8.17  | GQMLKYLKGKICTIQGDM*                                    | GGTCAGATGCTGAAGTACCTAGGTAAAGTCTGCACCATCCAGGCGTGACATGTGA  |
| P142-10 | PY04750 | H2-Kd | FYFPLYNYI         | 11.76 | EQKFYFPLYNYIIVFYV*                                     | GAGCAATTTTAAGTTCTACTACTACCCCTGTGATAACATGCTGTTTATGTGTGA   |
| P143-1  | PY04750 | H2-Kd | FYFFFYFKEI        | 24.2  | MEDSFYFFFYFKEIVENM*                                    | ATGGAAGATAGTTTCTACTTCTTACTTTAAGGAGATAGTAGAAAAATGTGTGA    |
| P143-2  | PY04750 | H2-Kd | SYIDKFDRL         | 32.73 | LVTLSYIDKFDRLLQHA*                                     | CTAGTAACACTGAGCTACATAGATAAGTTGTATAGACTGCTGCAGCACGCTTGA   |
| P143-3  | PY04754 | H2-Kd | KYHPTCSLL         | 4.7   | QLARKYHPTCSLLIDVQ*                                     | CAACTAGCACGTAAGTACCACCCTACCTGTAGCCTGCTGATAGACGTGAAATGA   |
| P143-4  | PY04754 | H2-Kd | SYISNEETI         | 5.87  | IEATSYISNEETITCQ*                                      | ATAGAGGCCACTAGCTACATAAGTAATGAGGAGACCATAACATGCCAAAAGTGA   |
| P143-5  | PY04754 | H2-Kd | RYNYYSYIY         | 12.01 | GTCTTTGGACGTAGATATAACTACTATAGCTACTACATAGTGCAGGGCACGTGA |                                                          |
| P143-6  | PY04754 | H2-Kd | YRRNNRVEI         | 29.06 | MKMDYRRNNRVEIKYQS*                                     | ATGAAGGACATGTAATAAGAAATAAGAGTAGAGATAAAGTACCCAGCTGTA      |
| P143-7  | PY04754 | H2-Kd | YLLSESSL          | 38.66 | SLMKVYLLSESSLORLQ*                                     | TCCCATAAGAAAGTGTAACCTGAGTGAGAGTAGACCTGCAGCGTCTCCAAATGA   |
| P143-8  | PY04757 | H2-Kd | KYISADVGL         | 26.38 | MQRFKYISADVGLAERP*                                     | ATGCAGCGATTTAAGTACATAAGCGCTGACGTAGCGCTAGCTGAGAGGCCATGA   |
| P143-9  | PY04757 | H2-Kd | KYLDLVGNL         | 44.14 | KFYLYKLDLVGNLMQTE*                                     | AAATTTTACTTTGAAGTACCTAGACCTAGTAGGTAACCTGATGCACAGTGAGTGA  |
| P143-10 | PY04760 | H2-Kd | SYTLVLCXI         | 35.26 | PQOESYTLVLCXISIGRCM*                                   | CCTCAACAGGAAAGCTACACCCCTGCTAGTGTGTAGCATAGGTAGGTGTATGTGA  |
| P144-1  | PY04766 | H2-Kd | IYFKNNYNI         | 7.26  | IVGGIYFKNNYNIYTVG*                                     | ATAGTAGGGGGCCTACTCTTAAGAATAACTATAACATAGGAGCTAGGCTGTA     |
| P144-2  | PY04766 | H2-Kd | YVRPSCCYL         | 30.6  | YDAAVYRPSCCYLWYPI*                                     | TATGATGCTGCGCGTGATAGACCTAGCTGCTGCTACCTGCTGCTACCCCTTTGA   |
| P144-3  | PY04766 | H2-Kd | SFIQNFLVI         | 32.54 | SRVGSFIQNFLVIKHEM*                                     | TCTAGGGTAGGTAGCTTCACTCCAGAACCTTCTAGTGATAAAACATGAATAGTGA  |
| P144-4  | PY04766 | H2-Kd | VHFNNGTIS         | 32.87 | ANLGVHFNNGTISQPRG*                                     | GCTAACCTAGGCGTGCACCTTTAAGCGGATAGTACATGCATCCAGCTGAGGGTGA  |
| P144-5  | PY04792 | H2-Kd | YYFYFISLI         | 3.99  | RYLSYFYFYFISLIGWGA*                                    | CGATACCTGCTTCTACTACTTCTACATCTTTAGCCTGATAGGGTGGGGCGCTTGA  |
| P144-6  | PY04792 | H2-Kd | SYFYFISFL         | 6.23  | SLQRSYFYFYFISLFFAP*                                    | AGCCTACAGGAGGAGCTACTACTTCTACATCTTTAGCCTTCTTCCGCCCTTGA    |
| P144-7  | PY04792 | H2-Kd | KYENKDYI          | 20.6  | RVFFLYENKDYIGWDD*                                      | AGAGTATTTTCTGTATAATGAGAATAAAGGACTACATAGGATGGGATGATTGA    |
| P144-8  | PY04792 | H2-Kd | LYNISADVGL        | 26.38 | LVMRKYNISADVGLPALF*                                    | CTAGTGATGCGTAAGTACATAAGCGCTGAGCTAGCCTGCCGGCTGTAGAATGA    |
| P144-9  | PY04792 | H2-Kd | KYLDLVGNL         | 44.14 | EVGGKYLDLVGNLSLRV*                                     | GAGGTAGGTGGTAAGTACCTAGAACCTAGTAGTAACTGTCCCTGAGGGGTGTA    |
| P144-10 | PY04793 | H2-Kd | KFMFNTSII         | 8.26  | TGLLKFMFNTSIENLA*                                      | ACAGGCCCTGCTGAAGTTCATGTTTAACTACTAGCATATAAGAAACCTGCTTGA   |
| P145-1  | PY04793 | H2-Kd | KEIPKMTSI         | 35.89 | ATSGKEIPKMTSIELCL*                                     | GCCACCTCCGGTAAGGAGATCCCTAAGACCATGAGCAGTACAGCTGTGCCGTGTA  |
| P145-2  | PY04813 | H2-Kd | KQIPNQNTL         | 22.27 | METLTKQIPNQNTLYSET*                                    | ATGGAAACCCCTGAAGCAGATCCCTAACCAGAACCCCTGTATAGTGAACCTTGA   |
| P145-3  | PY04813 | H2-Kd | KYHKNLNNM         | 32.11 | LLLDKYHKNLNNMLFAS*                                     | CTTCTGCTAGATAAGTACCATAAGAACCCTGAATAAGCTGAGCTTCTCTGCTGA   |
| P145-4  | PY04813 | H2-Kd | KYHKSANFSL        | 43.61 | IKSSHYSKANSFSLAQSL*                                    | ATAAAGAGTTCACACTATAGTAAGGCTAACTTTAGCCTAGGCCAGAGTGTGTA    |
| P145-5  | PY04813 | H2-Kd | NYNKNNNFL         | 48.57 | GLLRNYNKNNNFLRPGC*                                     | GGTCTGTTGCGTAACATAATAAGAATAATAACTTCTGAGGGCTAGCTGTGTA     |
| P145-6  | PY04831 | H2-Kd | KYHNHSMIL         | 8.37  | IRRGNYHNHSMILAYCL*                                     | ATTCGTCGCGGTAACTACATAGAAACCATAGCATGCTAGCTTATGCGCTCTGA    |
| P145-7  | PY04831 | H2-Kd | FYFIIQNI          | 10.05 | KELAFYFIIQNILNQN*                                      | AAAGAACCTAGCCTTCTACTTCTCATAATCCAGAACCTCTGAACCCAGAACTGA   |
| P145-8  | PY04831 | H2-Kd | NYFCHATNL         | 13.07 | INKENYFCHATNLSLRP*                                     | ATAAATAAGGAAAACCTACTTCTGCCACGCCACTAACCTGTCTTTGAGACCGTGA  |
| P145-9  | PY04831 | H2-Kd | IYNGVYVTHL        | 14.57 | LCNGIYNGVYVTHLRHSD*                                    | CTGTGTAATGGAATCTATAACGGCGTAGTGACCCACCTGAGACACTCTGACTGA   |
| P145-10 | PY04831 | H2-Kd | SQIKNFIAP         | 14.71 | VQVFSQIKNFIAPLRPH*                                     | GTACAGGTCTTTAGCCAGATAAAGAACACTTCTCGCCACTGCTGCCGCCCTATTGA |
| P146-1  | PY04831 | H2-Kd | YYYTQLNLL         | 15.28 | APIDYYYTQLNLLNDSC*                                     | GCTCCCATAGACTACTACTACACCCAGCTGAACCTGCTGAATGACTCCTGCTGA   |
| P146-2  | PY04831 | H2-Kd | LYYNFKSIL         | 16.68 | LTLLYYYNFKSIIQTKS*                                     | CTAACTACCCCTCCTGTAACATAACTTTAAGAGCATATAACAGACTAAAGCGTGA  |
| P146-3  | PY04831 | H2-Kd | KYYTQLNLL         | 18.67 | VEKGKYTQLNLLACKP*                                      | GTAGAGAAGGGTAAGTACTACTACACCCAGCTGAACCTAGCATGTAACCCCTGA   |
| P146-4  | PY04831 | H2-Kd | KYYTENGQI         | 19.77 | LRTSKYYTENGQIVNRI*                                     | CTACGCACTAGTAAGTACTACTAGCAACGCCAGCTAGCATGAATAGGATCTGA    |
| P146-5  | PY04831 | H2-Kd | KYHSKKHHI         | 23.99 | AYFVKYHSKKHHIEPGE*                                     | GCTTACTCTGTAAGTACCATAGTAAGAAGCACCACATAGAGCCCGGTGAGTGA    |
| P146-6  | PY04831 | H2-Kd | YNYCIKTDI         | 25.37 | SQHNYYNYCIKTDIRSVL*                                    | TCCCAGCATAATTACTATAACTGCATAAAGACTGACATCCCGCTGTGCTGCTGA   |
| P146-7  | PY04831 | H2-Kd | FYFELLINI         | 25.45 | WRNTFYFELLINILSSS*                                     | TGGAGAAACACTTCTACTTACTGAGCTGCTGATAAACCATCTGAGTAGTAGCTGA  |
| P146-8  | PY04831 | H2-Kd | YIYISIRNL         | 25.97 | LTSPYIYISIRNLQGRG*                                     | TTGACCTCTCCCTACTACATAAATAGTAGAATAAACCTGCAAGGTGAGGGGGTGA  |
| P146-9  | PY04831 | H2-Kd | FYFINDNLNL        | 30.6  | PSGDFYFINDNLNLKQDI*                                    | CCTAGCGGTGACTTCTACTATAATGATAACCTGAACCTGAACACAGGATCTGA    |
| P146-10 | PY04831 | H2-Kd | YIYINILKLL        | 34.36 | PRLLYIYINILKLLKTFW*                                    | CCACGCTTGCTGTACTACATAAACATCCCTGAAGCTGCTGAAGACTTTTGACTGA  |
| P147-1  | PY04831 | H2-Kd | IYVELFDSL         | 34.67 | VRNGIYVELFDSLNTA*                                      | GTGCGTAATGGGATCTACGTAGAGCTGTTTGTATAGCCTGAACACCCGCGGTGTA  |
| P147-2  | PY04831 | H2-Kd | NYTNYCLTIL        | 35.91 | RKQLTNYNYCLTILRVFA*                                    | CGTAAGCAACTGACCTATAACTACTGCTGACCATGCTGAGAGTATTGCGCTGA    |
| P147-3  | PY04831 | H2-Kd | YHYKYLKYL         | 38.31 | PRAIYYHYKYLKYLFRMK*                                    | CCACGCGCTACTACTACCATAAGTAACTGCTGAAGTACCTGTTTAGTAGAGTGA   |
| P147-4  | PY04831 | H2-Kd | IYIETKRNI         | 44.11 | HATAIYIETKRNIIVFR*                                     | CATGCCACAGCAATCTACATAGAGACTAAGAGAAACATAAATGTGTTCCGATGA   |
| P147-5  | PY04837 | H2-Kd | IYIFSFSLI         | 2.5   | PAGAYIIFSFSLINTHP*                                     | CCGGCCGGAGCCTACTACATCTTTAGCTTTAGCCTGATAAACACTCACCCCTTGA  |
| P147-6  | PY04837 | H2-Kd | YYSNNHSNI         | 2.68  | TRHKYIYSNNHSNISDPS*                                    | ACAGCTCATAGTACTACTAGTAATAAACCATGATTAAGCTACTGATAGTTGA     |
| P147-7  | PY04837 | H2-Kd | YYFLFDSOI         | 5.87  | CSHDYYYFLFDSOITISH*                                    | TGTAGCCATGATTACTACTTCTGCTGTTTAGCCAGCAATACTTCTCTCACTGA    |
| P147-8  | PY04837 | H2-Kd | YLWLPJIE          | 29.78 | HVFFYYLWLPJIELISFC*                                    | CATGCTCTTCTTCTACCTGTGGCCTATAGAGCTGATCTCATTTTGTGCTGA      |
| P147-9  | PY04837 | H2-Kd | SYSDLREII         | 35.01 | MEGTSYSDLREISIAV*                                      | ATGGAAGGCACTAGCTATAGTGACCTGAGAGAGATAATCTCAGCCATAGTTTGA   |
| P147-10 | PY04837 | H2-Ld | LPFTFFIYL         | 39.74 | PRKALPFTFFIYLSAQA*                                     | CTAGAAAAGGCTCTGCGCTTCTGACCTTCTTCACTGCTGCTAGTGTGCTGAGTGA  |
| P148-1  | PY04854 | H2-Kd | KYFYFKSVI         | 4.81  | CEGLKYYFYFKSVIHPTE*                                    | TGTGAGGGACTGAAGTACTACTTCTATAAGGCGTGATCCATCACTAGAGCGTGA   |
| P148-2  | PY04854 | H2-Kd | RYNNSKEYI         | 8.71  | LARTRYNNSKEYIIVPLE*                                    | CTACACGCTACTAGATATAATAAGTAAAGGACTAGATGTTTCCCTAGAGTGA     |
| P148-3  | PY04854 | H2-Kd | IYNNENINNI        | 10.35 | GRFLIYNNENINNIHVHQ*                                    | GGTAGATTCTTAATCTATAATGAGAACAATAAACATAGTACATAAACAGTGA     |
| P148-4  | PY04854 | H2-Kd | LYNNSKVEI         | 15.76 | GLKPLYNNSKVEIVKGC*                                     | GGCTTGAAGCCCACTGTATAATAATGTAAGGTAGAGATAGTGAAGGCGCTGTTGA  |
| P148-5  | PY04854 | H2-Kd | KLINNYNSI         | 21.12 | CSHLKLINNYNSIQGN*                                      | TGTAGCCATTTTGAAGCTGATAAATAACTATAATAGTACCTAGGCTAAGCCGTTGA |
| P148-6  | PY04854 | H2-Kd | FYVSPILNI         | 28.79 | SLAGFYVSPILNIGDAV*                                     | TCTCTAGCTGGCTTCTACGTGAGCCCTATCCTGAACATAGGTGATGCCGATTGA   |
| P148-7  | PY04854 | H2-Kd | YVTNNNTNL         | 42.93 | KFGKVYVTNNNTNLVKLF*                                    | AAATTCGGTAAGGGTACACTAATAAACACTGAACCTAGTGAAGCTGTTTGA      |
| P148-8  | PY04854 | H2-Kd | KYLNNIDDI         | 45.11 | VAYPKYLNNIDDIGSPM*                                     | GTAGCCTATCCTAAGTACCTGAATAATGACATAGACATAGGCTGCCCTATGTTGA  |
| P148-9  | PY04854 | H2-Ld | SPLINLYL          | 9.97  | LSTPSPLINLYLSPGLL*                                     | CTACCTCCTAGCCCTATCCTGAACCTATAGCCTGCGCTGGCGTGTGTTGA       |
| P148-10 | PY04895 | H2-Kd | CYTYVVEFI         | 32.46 | FPHPCYTYVVEFISITA*                                     | TTCCGCATCCCTGCTACACCTACGTAGTAGAGTTCACTCTCAATAACCCGCTGA   |
| P149-1  | PY04895 | H2-Kd | IYISYIVGL         | 41.81 | TKQVIYISYIVGLEAGH*                                     | ACTAAGCAGTAATCTACATAAGCTACTAGTAGGCTAGAGGCCGGACATTTGA     |
| P149-2  | PY04895 | H2-Kd | YVSEFHYSHVGLLITI* | 44.99 | VRSEFYSHVYGLLILITI*                                    | GTGAGAAGTGAATTTATAGGACCGTAGGCTGCTGCTGATGACCAATTTGA       |
| P149-3  | PY04895 | H2-Kd | KYLININTRV        | 48.97 | GLVWKYILININTRVSMGR*                                   | GGGCTAGTATGGAAGTACCTGAACATAAACCACTAGAGTGTCAATGGGTGATGTA  |
| P149-4  | PY04912 | H2-Kd | YKNTKGNL          | 28.3  | ECVEYLLKNTKGNLTGPE*                                    | GAATGTGTAGAGTACTACCTGAAGACTAAGGGTAAACCTGACTGGAACCTGAGTGA |
| P149-5  | PY04917 | H2-Kd | IYQNLILNI         | 34.03 | KIGLYQNLILNIRTLR*                                      | AAGATAGGACTGATCTACCAGAACCTGATCCTGAACATAAAGAACACTGAGATGA  |
| P149-6  | PY04917 | H2-Ld | NPIFNHYLF         | 33.84 | LEAKNPIFNHYLFKCAR*                                     | CTAGAGGCTAAAAACCCCTATCTTTAACCACTACCTGTTTAAATGTGCTAGATGA  |
| P149-7  | PY04921 | H2-Ld | HPLPNLYIM         | 8.33  | FQVHPLPNLYIMPPELL*                                     | TTTGATGTGAAGCACCCCTGCTGCTAACCTGTACATAATGCCTGAACCTCTGCTGA |
| P149-8  | PY04935 | H2-Kd | KYLKNNTNI         | 4.03  | RQSHKYLYKNNTNIMGY*                                     | CGACAATCACATAAGTACCTGAAGAATAAAGAGTAACTAGTGGCGGTAAGTGA    |
| P149-9  | PY04935 | H2-Kd | KYFSYFQCI         | 5.86  | SLLRKYFSYFQCFIGDT*                                     | AGTCTCTCCGTAGTACTTTAGCTACTTCCAGTGCACTTTTGGTGACACCTGA     |
| P149-10 | PY04935 | H2-Kd | NYMVNNTNI         | 5.88  | VGGPNYMVNNTNIEHQ*                                      | GTAGGAGGGCCCTAAGTACATGTTGTAATACCATACATAGAACATCAGAGGTGA   |
| P150-1  | PY04935 | H2-Kd | KYINYYGI          | 6.11  | SLIAKINYIYYGITGR*                                      | AGTCTAATAGCTAAGTACATAAACTACTACTAGCCGATAACCCGTAGAGAGTGA   |
| P150-2  | PY04935 | H2-Kd | YVCKTYSYFL        | 30.19 | GLPKYVCKTYSYFLSFAT*                                    | GGGCTCCCTAAGGTGTAAGTGAAGACCTATAGCTTCTGCTCTTGGCCACCTGA    |
| P150-3  | PY04935 | H2-Kd | YYEYSINML         | 44.02 | AGEPYEYSINMLQTKA*                                      | GCTGGTGAGCCATACTATGATGATAGCATAAACATGCTGCAAACTAAGGCAATGA  |
| P150-4  | PY04937 | H2-Kd | YYNDAVNKL         | 34.69 | KLLAYYNDAVNKLQSLQ*                                     | AAGTTGTAGGCTACTATAATGACGCGGTGAATAGCTGATCATGAGCGTGTGA     |
| P150-5  | PY04969 | H2-Kd | SYNNYLAI          | 5.62  | DDRASYNNYLAILVLC*                                      | GATGATAGGCTAGCTATAGATAAATAACTAGCTAGCCATCTAGCTCTGCTGCTGA  |
| P150-6  | PY04969 | H2-Kd | YYNFKPSL          | 14.36 | QPLPYNNFKPSLFLER*                                      | CAGCCTTTGCCCTACTATAAATCTCCTGAAGCGTACGCTGCTCTTGAAGAGGTGA  |
| P150-7  | PY04969 | H2-Kd | NYNLNKSNI         | 25.08 | QQNSNYNLNKSNILASE*                                     | CAGCAAAATAGTAACCTACCTGAACATAAAGAGTAACTAGCTAGTGAAGTGA     |
| P150-8  | PY04969 | H2-Kd | NYLTLYSGI         | 28.22 | HKYTNYLTYSGIMSFK*                                      | CATAAGTACACTAACTACCTGACCCTGTATAGCGGCATAATGAGCTTTAAGTGA   |
| P150-9  | PY04969 | H2-Kd | NYNGWFSLL         | 39.32 | NRNSNYNGWFSLLVTM*                                      | AATAGAAACTACTAATAAAGCGCTGGTTTAGCCTGCTGCTAGTGACGATGTGA    |
| P150-10 | PY04969 | H2-Kd | KLINASSLI         | 44.24 | DAGAKLINASSLSIAAK*                                     | GACCGAGGGGCTAAGCTGATAAACCGTATAGTAGTACCTAGCTAGCACTAAATGA  |
| P151-1  | PY04985 | H2-Kd | YYNCEKNII         | 26.56 | PLKKYYNCEKNIIYMGN*                                     | CCGCTGAAGAAGTACTACGCTGTGTGAGAAGAACATATCTACATGCTGTAAATGA  |
| P151-2  | PY04990 | H2-Kd | ANGNHYNFFFL       | 7.33  | ANGNHYNFFFLSILK*                                       | GCTAATGGTAACCACTATAATAACACCTTCTTCCCTCTGATCTTTAAATGA      |
| P151-3  | PY05001 | H2-Kd | TYFSFSYFL         | 28.06 | RPIRTYFSFSYFLPKQK*                                     | AGGCCAATAAGAACCTACTTTAGCTTTAGCTACTTCTGCTCAAAACAGAGTGA    |
| P151-4  | PY05002 | H2-Kd | KYANSTRTI         | 13.39 | WKRMKYANSTRTIKLEQ*                                     | TGGAACCGGTAAGTACGCTAACCACTAGTAGAAGCTAGCAACCTAGAGAGTGA    |
| P151-5  | PY05002 | H2-Kd | SYIYNKIIL         | 19.9  | AGVTSYIYNKIILRPKR*                                     | GCGGGGGTGACTAGCTACTCTATAATAAGATAAAGCTGAGGCGCTAAAGATGA    |
| P151-6  | PY05002 | H2-Kd | SYINKKNEL         | 29.69 | LYQRSYINKKNELSPK*                                      | TTGTACCAAAAGGAGCTACATAAATAAGAAGATGAGCTGTGCTAGAAAGTGA     |
| P151-7  | PY05002 | H2-Kd | SYLFKGTNI         | 45.19 | KYVMSYLFKGTNIPEPV*                                     | AAGTACGTAAAGAGTACCTGTGTTTAAAGACCGGTAAACATGAGCACTTTGTGTGA |
| P151-8  | PY05002 | H2-Kd | VFINLSLYL         | 47.09 | TOQVVFINLSLYLARES*                                     | ACCCAGAGTAGATGTTTCATAAATGACCTGAGTACCTAGAGGCGCTAGCATGTGA  |
| P151-9  | PY05002 | H2-Ld | VPVYLRILL         | 39.24 | GQGPVPVYLRILLTCRE*                                     | GGGACGGGTCGCTGCTGCTTACGCTGAGACTGCTGAGCTGAGGCTGAGTGA      |
| P151-10 | PY05002 | H2-Ld | VPLQAHIFF         | 44.92 | EILKVPLQAHIFFGNSL*                                     | GAAATCCTGAAGGTCGCTCTGAGGCGCCACTCTTCTTCGGTATAGGCTTTTGA    |
| P152-1  | PY05006 | H2-Kd | NYFKLPFSI         | 8.23  | LFDANFYFKLPFSIVQEA*                                    | CTTTTTGATGCTAACTACTTTAAGCTGTGTTCCCTAGCTGCTGACGAGGCGTGA   |

|         |            |       |                      |                                                           |
|---------|------------|-------|----------------------|-----------------------------------------------------------|
| P152-2  | GYVVKLYSL  | 22.42 | RFPGQVYNKLYSLVYIR*   | CGTTTTCTCAGGGCTACGTGAATAAGCTGTATAGCCTAGTGACATAAGATGA      |
| P152-3  | YYNSETHNL  | 25.17 | LHQPYYNSETHNLTOEL*   | CTGCATCAACCCCTACTATAAATAGTGAGACTAACCCACTGACACAGGAAGCTGTA  |
| P152-4  | YFNKDDTNI  | 30.07 | RPLPFYKDDTNI         | AGGCCTCTGCCCTCTACCAGAAAGGACACTAACATAACCCCTCCACATGA        |
| P152-5  | NYNDAYNMI  | 48.82 | LIGVYNNDAYNMIVQDS*   | TTGATAGGGTATAACTATAATGACGCCTATAACATGATAGTGAAGATTCTTGA     |
| P152-6  | HYMGNLLDI  | 10.34 | VVREHYMGNLLDISACQ*   | GTAGTCCGTGAACACTACATGGGTAAACCTGCTAGACATCTCTGCCTGTCAATGA   |
| P152-7  | YSNSDLYII  | 11.69 | EANLSYNSDLYIIQAES*   | GAAGCTAATTTAAGCTATAATAGTGACCTGTACATAATCCAAAGCTGAAGCTGA    |
| P152-8  | HYMHKPLIE  | 12.29 | AARGHYMHKPLIEGYN*    | GCCGCTAGGGGCTACATACATGCACCTGAAGCCCTGTGATAGAAAGCTATAATTTGA |
| P152-9  | MYHYGRCL   | 22.44 | KGKNNMYHYGRCLPEKK*   | AAGGGTAAGAATATGTACCACTACGCTAGATGTCATAATCCGTGAAGAAAGTGA    |
| P152-10 | RYLYRHHFL  | 35.18 | ACTRLYLYRHHFLVFM*    | GCTTGACCCCTGAGATACCTGTATAGACACTCTCTCCTGTTCTGATGCTGTTGA    |
| P153-1  | LPSLAFHVF  | 27.25 | NRRSLPSLAFHVFDPPE*   | AATAGAGGCTCTCGCCTAGCCTAGCTTCCACGCTGTTCCCTGATCCTGAGTGA     |
| P153-2  | MYNKTFSVI  | 16.04 | VMSMMYNKTSFVILTVF*   | GTAATGTCCATGATGTATAATAAGACTAGCTTCGTGATCCTCAACTGCTCTTTTGA  |
| P153-3  | IYYTYNQEL  | 22.82 | ILHGIYTYNQELAEIG*    | ATCCTCCATGGTATCTACTACACCTATAAACCAAGAGCTAGCTGAATAGGGTGA    |
| P153-4  | LYFTKNTII  | 24    | QMLKLFTKNTIIDSVG*    | CAGATGTTGAAACTGTACTTCACTAAGAACCACCAATAGACTCGGTAGGCTGA     |
| P153-5  | KYFKLSNF   | 30.74 | WLLFKYFKLSNFVAVTS*   | TGGCTGCTCTTTAAGTACTTTAAGAGCCTGAGTAACCTCGCCGTAACCTTCTGA    |
| P153-6  | HYFNFFLKL  | 47.5  | SDTSHYFNFFLKLRYCF*   | AGTGACACATCCCACTACTTTAACTTCTTCCCTGAAGCTGATAGGTTGTTTTGA    |
| P153-7  | GYLCSHSP   | 3.27  | MWSRGYLYLCSHSPISOLY* | ATGTGGAGTAGGGGCTACCTGTGTAGCCATAGCCCTATCTCCAGATGTATATTTGA  |
| P153-8  | SYMHSKLII  | 3.86  | YCAPSYMHSKLIIKISIA*  | TACTGTGCTCTAGCTACATGCATAGTAAGCTGATATAAAGCTAGACTGTTGA      |
| P153-9  | SYMVIAHGI  | 5.39  | VFSTSYMVIAHGIKED*    | GTGTGCTCTACTAGCTACATGGTGATAGCCCAACGCCATAACTAAGAGGAAGCTGA  |
| P153-10 | FYMSLSLEL  | 5.71  | GRTEFYMSLSLELCGNM    | GGTGAAGCTGAGTCTACATGAGCATGAGCTGAGCTGTTCGTGGTAACTGTGA      |
| P154-1  | FYSHNIGNI  | 15.47 | GLHHFYSHNIGNIKENR*   | GGACTACACATTCTTATAGCCATAACATAGGTAAACATAAAGAGGAATAGATGA    |
| P154-2  | NYFKHITVL  | 16.14 | GGLENYFKHITVLSYPM*   | GGAGGGCTAGAGAACTACTTTAAGCACATAACCTGCTGCTGATTCCTCAATGA     |
| P154-3  | KYFHILPSL  | 19.42 | QNEVYKFHILPSLPMI*    | CAAAATGAAGTGAAGTACTTCAATAATCCTGCTGACTGAGCTGCCGCTAATGATGA  |
| P154-4  | HYTYNNYNI  | 20.29 | HKMSHYTYNNYPCMS*     | CATATGAAATCACACTACACCTACTATAATACTACATCCCCGTGATGAGCTGA     |
| P154-5  | NYTISYSEVI | 20.82 | IRDGNVYISYSEVIVPHL*  | ATCCGTGACGGTAACCTACATAAGCTATAGTGAGGTGATGAGGTGATGAGTGTGA   |
| P154-6  | RYVNDEHSL  | 24.42 | DSKSRYVNDEHSLNHGM    | GACTCTAAAAGTAGATACGTGAATGATGAGCATAGCCTGCATAACCGAATGTGA    |
| P154-7  | NYISYDEVI  | 26.92 | AYDSFYISYDEVI        | CGCTATGACTCGTTCTACACTAGCTTCCGTGAACATGATGAGTGAATCTTTTGA    |
| P154-8  | SYSDLOFL   | 34.63 | LVGVSYSDDLQFLUQTQ*   | TTAGTAGGGGTGAGCTATAGTGACCTGCAGTCTCGTATCCAGGTACACTGATGA    |
| P154-9  | SHWNIRTYI  | 37.31 | KHSVSHWNIRTYIQLTS*   | AAGCATTCAGTGAGCCACTGGAACATAAAGAACCTACATCCAGTCTGAGCAGTGA   |
| P154-10 | TYIMLPFI   | 39.4  | SCLRTYIMLPFIIRTRK*   | TCCTGTTTGAGGACCTACATAATGCTGCCCTTTCATAATAAGAACCCGTAAAGTGA  |
| P155-1  | SVFVSHWNI  | 43.66 | ALSGSVFVSHWNISQA*    | GCACCTTCTGCTAGCTTCGTGTTTGAAGCCACTGGAACACTGTAGTACAGGCTGA   |
| P155-2  | KYGIKNTI   | 47.09 | HDPQKYGIKNTIINNL*    | CATGACCCCCAGAAAGTACGGCATAGATAAGAACACCCATAATAGGATCTGTTGA   |
| P155-3  | KYIYVLSL   | 48.79 | VRSKKYIYVLSLKKFS*    | GTGAGGTCTAAGAAGTATAGAATCTACCTGAGTACGCTGAAGAAAGTTAGCTGA    |
| P155-4  | YYIYVCAI   | 5.87  | GSVEYIYVCAIEFAV*     | GGTAGTGTAGAATACTACATCTACGTGCGGCCATAAGAGATTTGCAAGTGTGA     |
| P155-5  | KYIYVCAI   | 11.69 | WITRKYYIYVCAIYVEN*   | TGGATAACTAGGAAGTACTACATCTACGTGTGCGGCCATAGCTCTAGAGAACTGA   |
| P155-6  | MYAYDIYFI  | 47.58 | SEIVMYAYDIYFIENDT*   | AGTGAATAAGTATGATGACGCCCTAGTACTGATCTTTCATAGAAATGACTGATTGA  |
| P155-7  | LYYDDHNEI  | 13.82 | VQQLLYYDDHNEIRLYS*   | GTCCAGCAGTTGCTGTACTATGATGACCAATAGATGAGTCCGCTCTACTCTTGA    |
| P155-8  | RYKGPPELL  | 28    | CGGVRYRYKGPPELLVLL*  | TGCCGTGCGCTGAGATACATAAAGGCCCTGAGCTGCTGATGCTGTTACTGTA      |
| P155-9  | IYVNMKDII  | 29.98 | VRWPIYVNMKDIIVSKV*   | GTGAGGTGCGCTATCTATAACGTGATGAAGGACATAATAGTATCTAAAGTGTGA    |
| P155-10 | KFYSNKCEI  | 31.04 | DHTDKFYSNKCEISRLN    | GACCACACTGATAAGTCTTATAGTAATAAGTGTGAGATCTCTCGTAATCTCTGA    |
| P156-1  | IYVFSEAEI  | 38.03 | AGSNIYVFSEAEITTP*    | GCCGGGCTAATACTATAACTTTAGTAGGCTGAGATAGGCACCAACCCGTGA       |
| P156-2  | SYLINFNL   | 37.33 | GWPESYLINFNLGAKK*    | GGTTGGCCTGAGAGCTACCTGATAAACCCTCATAAACCTAGGAGCTAAAAGTGA    |
| P156-3  | KYKLSFIDI  | 27.8  | LTPMKYLSFIDIRGTF*    | CTGACGCCCATGAAGTACCTGTATAGCTTCTATAGACATAAGGGGTAACCTCTGA   |
| P156-4  | KFISVATTL  | 10.81 | AKAPKFISVATTLSAHM*   | GCTAAAGCTCCTAAGTTTCAATAGCGTAGCCACCCCTAGCGGCACCATGTGA      |
| P156-5  | YYSDAESFL  | 11.91 | DAEGYYSDAESFLDDDN*   | GACGCTGAAGGATACTATAGTGACGCTGAGAGCTTCTGATGATGATGATAATGA    |
| P156-6  | SYFGDVDEI  | 9.8   | YDGASYFGDVDEIHEME*   | TATGATGGAAGCTAGCTACTTCGGTGACGTAGATGAGATCCATGAGATGGAGTGA   |
| P156-7  | SYHSVNSFI  | 2.56  | AIFFSYHSVNSFIKETA*   | GCCATTTTCTTTAGCTACCATAGCGTGAATAGCTTCTATAAAGGACAGACGTGA    |
| P156-8  | KYFKLLGQL  | 14.53 | LLESKYFKLLGQLEATN*   | CTGCTAGAACTAAGTACTTTAAGCTGTGAGCCTGAGGCTAGAGGCCACTTTGA     |
| P156-9  | FYNEVIEEL  | 19.92 | LSQEFYNEVIEELKFEA*   | CTTTCCAGGAGTCTTATAATGAGGTGATAGAGGAGCTGAAATTTGAGCCGCTGA    |
| P156-10 | KYINVTISII | 2.21  | YGAAKYINVTISIYQSP*   | TATGGGGCTGTAAAGTACATCTATAACACTAGCATAACTGCTCAGTCCAGCTGTA   |
| P157-1  | YYYSYKNNI  | 4.82  | SDKGYYSYKNNIEQLK*    | TCTGATAAAGGGTACTACTATAGCTATAAGAAATAAGATAGAACAGCTGAAGTGA   |
| P157-2  | YYIISKPDI  | 5.09  | LVRLSYIISKPDICTDF*   | CTAGTCCGCTGAGCTACATAATAAGTAAGCCTGCTATCTGCTAGCTATTCTGA     |
| P157-3  | KYIKILWNL  | 8.75  | RAQEKYIKILWNLPTDM*   | AGGGCTCAGGAGAAGTACATAAAGATCCTGTGGAACCTGCCCACTGATATGTGA    |
| P157-4  | SYHHLTVVI  | 11.64 | VSNLSYHHLTVVIKAKC*   | GTCTCTACCTGAGCTACACCACTGACCGTACCTGATGAATAAGTGAAGTGTGA     |
| P157-5  | CYFGCIYII  | 20.23 | ILLPCYFGCIYIAYDF*    | ATCCTGTACCTTGCTACTCTCGGCTGCATCTACATAAAGCTATTGTTGACTGA     |
| P157-6  | KYFPIILTI  | 24.01 | PKYWKYFPIILTIIMAV*   | CCTAAGTATTGGAAGTATGAGCCTATAATCTGACCCATAAAGTGGCAGCTGA      |
| P157-7  | HYFVFLNLI  | 25.46 | CTVSHYFVFLNLIELS*    | GTGACAGTGAGCCACTACTCTGTTGCTTCCGTAACCTGATAGAGAGTGTCTTGA    |
| P157-8  | IYYSNNMALL | 35.92 | RVTMYYYSNNMALLLAL*   | CGCGTAACCATGATCTACTATAGTAACATGGCCCTGCTGCTGACGATTAGGCTGA   |
| P157-9  | YQNYNLFYI  | 40.89 | WKERYQNYNLFYICPLR*   | GTGAAAGAGAGAGGTACCCAGAACTATAAGTCTTCTACTACTGCTGATGAGGTGA   |
| P157-10 | SYNSIINI   | 8.8   | VGQPSYNSIINIIQGSP*   | GTAGGCCAGCCTAGCTATAATAGCATATAAACATAAAGGCGACAGGCGCGTGA     |
| P158-1  | SYNNRSCFV  | 29.2  | QFTDSYNNRSCFVYDST*   | CAGTTCACTGATAGCTATAATAATAGATGTAGCTCTGTTGATGATTCAACATGA    |
| P158-2  | LYFHFYKSL  | 31.47 | KIAELYFHFYKSLPVRE*   | AAGTAGCTGAACGTGACTTCCACTTCTATAGTAAGCTGCCGCTGCGGTGAGTGA    |
| P158-3  | SYKMGCLSI  | 18.32 | LHKESYKMGCLSITKGC*   | CTCCATAAGGAAAGCTATAAGCACATGGCGCTGACACATAAGCTGCGGCTTGA     |
| P158-4  | IYYKSPNII  | 21.48 | PILIIYKSPNIIISRM*    | CCAATACTGATAATCTACTATAAGAGCCCTAACATCCTGAGTAGGATGATTTGA    |
| P158-5  | IYINIFHTI  | 5.2   | SGPDIYINIFHTI SEDF*  | AGTGGGCTGATATCTACATAAACACTCTTCCACACCCCTGCTGAAGACTTCTGA    |
| P158-6  | IYININPL   | 6.15  | SVQRIYININPLKVLK*    | AAGCTGCGAGCGGATCTACATAAATAACATAAACCTCTGAAAGGCTGTGAAGTGA   |
| P158-7  | MYNAQGYLI  | 46    | VKPLMYNAQGYLIADDP*   | GTGAAGCCCTAATGTATAACGCCCGAGGCTACCTGATAGCTGATGATCCTTGA     |
| P158-8  | SFLFALCSI  | 46.66 | PTSSSFLFALCSILAPR*   | CCACATCTGCTAGCTTCTGCTGCTGCGCCTGTGATAGCTGCTAGCTGATGCTGA    |
| P158-9  | KYTKMLQNI  | 5.06  | KESGKYTKMLQNLINLQ*   | AAAGAAATCTGGTAAGTACATAAGATGCTGACAGAACATAAATCCCTCCAGTGA    |
| P158-10 | KQIRNMSVI  | 11.16 | HFRPKQIRNMSVIGLDK*   | CACCTCCGCCCTAAGCAGATAAAGAACATGAGCGCTGATAGGCGCTAGATAATGA   |
| P159-1  | IYQTFARTI  | 42.24 | TVLLIYQTFARTISDTK*   | ACAGTCTCCTAATCTACCAGACCTTCGCTAGAACCAATAGTGATACTAAATGA     |
| P159-2  | SYQPQFFTI  | 2.63  | QSSHSYQPQFFTISANP*   | CAGAGCTCCCATAGCTACCAGCCTGGCTTCTTCCACCATAAGCGCTAATCCCTGA   |
| P159-3  | SYFFSLATI  | 13.58 | HLKLSYFFSLATILVLK*   | CACCTGAAGCTGAGCCTTCTTCTTTAGCCTAGCCACCATCGCTGATGAAGCTCTGA  |
| P159-4  | KEFENINEI  | 31.2  | LHDKKEFENINEIFDDD*   | CTGCATGATAAGAAGGAGTTTGAGAACATAAATGAGATCTTGTGATGATGACTGA   |
| P159-5  | YYNDISFLT  | 4.9   | LANNFYNDISFLTTEFT*   | TTAGCTAATAACTTCTACTATAAGACATAAGCTGCTGCTGACTGAGTCACTTGA    |
| P159-6  | TYFYLTNLI  | 13.46 | DPEMTYFYLTNLIPLCT*   | GACCTGAAATGACCTACTTCTACCTGACTAACCTGATCCCACTAACATGCTGTA    |
| P159-7  | SYFYQVLFL  | 37.32 | SSCLSIFYFYQVLFLSVRI* | TCTCTTGCCTGAGCTACTTCTACCAAGGTGCTGTTCTGCTGATGAGGATATGA     |
| P159-8  | NYVNNLLSL  | 19.04 | SDYRNMYNNLLSLDLLM*   | TCTGATTATCGTAACGTGAATAACCTGCTGAGGCTAGATCTGCTGAATGTGA      |
| P159-9  | RMHPIRHHI  | 35.5  | ELFRMRMHPIRHHINVA*   | GAATTGTTTTAGAAGAATGCACCCTATAAGACACACACATAAATAAGTACTGCTGA  |
| P159-10 | TYVDRIASI  | 21.95 | LEISTYVDRIASIRLS*    | CTAGAAATAAGTACCTACGTAGATAGATAAGCTAGCATATAAGACTGAGCTGA     |
| P160-1  | RYQEFSAKI  | 25.9  | DFTFRYQEFSAKIVGFE*   | GACTTCACTTTAGATACCAGGAGTTTAGCGCTAAGATAGTAGGGTTGGAATGA     |
| P160-2  | LYIPGTKMI  | 14.46 | TSGLKYIPGTKMIIGGEI*  | ACTAGCGGTAACCTGTACATCCCTGGCACCTAAGATGATAGGGGTTGAAATCTGA   |
| P160-3  | FYIKNSPYI  | 3.7   | WPAEFYIKNSPYIHFKL*   | TGGCCAGCTGAAATCTACATAAAGAAATAGCCCTTACATCCACTTTAAGCTGTGA   |
| P160-4  | SYINQVNI   | 4.19  | GTCCSYINQVNIPTGVG*   | GGCACCTGCTGTAGCTACATAAACCCAGGTGAACCTTCAACAGCGGATAGATGA    |
| P160-5  | KYIENSEKI  | 11.18 | TESAKYIENSEKIAML*    | ACTGAAAGTGCTAAGTACATAGAGAAATAGTGAAGAAAGTGCCTGATGTTATGA    |
| P160-6  | KYIKNVEKL  | 11.47 | TSCLKYIKNVEKLIVPR*   | ACCTCCACATTAAGTACATAAAGAACCTAGAGAGCTGATGATGATGAAAGTTTGA   |
| P160-7  | YYNNINLPL  | 12.05 | VLCPPYNNINLPLVAGM*   | GATTTGTGCCGCTACTATAATAACATAAACCTGCCCTAGTAGCTCAAAATGA      |
| P160-8  | KYNNVAYNGI | 13.22 | TLPKKYNNVAYNGIMWPA*  | ACCTCGCCTAAAGAAATAAAGTACGCTACATAACGCCATGATAGCTGCGCCGCTGA  |
| P160-9  | YYINWITII  | 13.22 | PAPPVYYINWITIIISRL*  | CCCCGCCACCCGCTGACTACATAAAGTGGACCAATCTGCTGCTGACTGTGA       |
| P160-10 | KYIYFFIFI  | 19.17 | TPEVKIYIYFFIIGQME*   | ACTCCTGAAGTGAAGTACATCTACTTCTTCTCATATAAGGGCAGATGGAGTGA     |
| P161-1  | YYINNDI    | 21.12 | LEWVYYINNDIASYNI*    | CTAGAGTGGGTGACTACATCTATAAAGACATAAGCTAGCATGACTATAATTGA     |
| P161-2  | KAINTFFSI  | 25.63 | VEEKAINTFFSISRSN*    | GTGAAGAGAAAAAGGCCATAAACACCTTCTTTAGCATCTCCCGGCTCAACTGA     |
| P161-3  | IYYEDFHLL  | 26.63 | CAHGIYYEDFHLLQTKL*   | TGCGCGCACGGGATCTACTATGAGGACTGCTGCTGCTGACAGTCAAGCTTTGA     |
| P161-4  | KMYEWINEI  | 37.81 | IRTAKEYEWINEISVRL*   | ATAAGAACTGCTAAGATGATGAGTGGATAAAGAGATCTCTGTGAGGTTGCTGA     |
| P161-5  | IYHTKINHI  | 45.41 | SRKFYHTKINHISAKR*    | AGCGCTAAGTTTCATCTACCACATAAGATAAGCAACATCTGCTGAAGGCGTGA     |
| P161-6  | LYIYCLLFI  | 48.69 | GMVLLIYIYCLLFIIRGL*  | GGGATGGTCTCTGTACATCTACTGCTGCTGTTTCAATCCGCGGCTGCTGTGA      |
| P161-7  | WFFFILNEI  | 49.24 | YSNIFWFFFILNEIYDRV*  | TATAGTAACATTTTCTGGTCTTCTACTCTGATAGATCTATGATGACGTGA        |
| P161-8  | HPINFANI   | 22.2  | TPTLHPINFANIGCGG*    | ACACCAACACTCCACCTATCCCTAACTTCGTGAACATAGGCTGTGGCGGCTGA     |
| P161-9  | KYIHNMNKI  | 3.26  | TRTTKYIHNMNKICWFS*   | ACTAGAACCATAAGTACATCCATAACATGAATAAGTCTGCTGTTGTTTTCTGA     |
| P161-10 | YIINNENVI  | 3.94  | AIDQYIINNENVIDDYY*   | GCAATAGACCAATACTACATAAATAAGTGAAGAGCTGATAGTGAAGTACTGA      |
| P162-1  | IYFNYAHNI  | 4.46  | SEADYIYFNYAHNISYFP*  | AGTGAAGCTGACATCTACTTTAACTACGCCCAACATCTCCTACTCTCCGCTGA     |
| P162-2  | YVYNGNHPI  | 7.21  | ANPKYVYNGNHPIAALF*   | GCTAATCCTAGACTACTATAACGGTACGCGCAACCACTATAGCTGCTTTTTTGA    |

|         |         |       |            |       |                      |                                                           |
|---------|---------|-------|------------|-------|----------------------|-----------------------------------------------------------|
| P162-3  | PY05484 | H2-Kd | IYFYNNEEI  | 11.87 | ACILYFYNNNEEIAKVL*   | CGCTGTATCCTAATCTACTTCTATAATAATGAGGAGATAGCTAAAGCTCCTGTGA   |
| P162-4  | PY05484 | H2-Kd | SYSSMHSIV  | 12.56 | ANPEYSYSSMHSIVQMFO*  | GCTAACCCTGAGAGCTATAGTAGCATGCATAGTCAGATGTCCTGACCTGTA       |
| P162-5  | PY05484 | H2-Kd | SYNPETVLI  | 21.69 | QWKVSYNPETVLIVFVE*   | CAGTGGAAAGTGAGCTATAACCCTGAGACCGCTGCTGATAGTTCTGTAAGATGA    |
| P162-6  | PY05484 | H2-Kd | FYNERKYEI  | 35.47 | ANAAFYNERKYEIPSE*    | GCTAATGCAGCCTCTCTATAATGAGAGAAAGTAGATAGATCCCTAGTGTATGAGTGA |
| P162-7  | PY05522 | H2-Kd | FYNNMSNKI  | 5.65  | MKSRYFYNNMSNKISLHP*  | ATGAAGTCTAGATTCTATAATAACATGAGTAATAAGATAAGCGCTTCATCCCTGTA  |
| P162-8  | PY05522 | H2-Kd | MYKNEYLL   | 28.21 | VIYSMYKNEYLLKLEN*    | GTGATTACTCAATGTACTATAAAGATGAGTACCTGCTGAGAGCTAGAGAACTGA    |
| P162-9  | PY05522 | H2-Kd | KEMKFYPTI  | 31.66 | EVPOKEMKFYPTIVCS*    | GAAAGTGCCCTCAGAAGGAGATGAAGTTCTACACCCCTATAGTGTGCTCTGAGTGA  |
| P162-10 | PY05537 | H2-Kd | YHNNTYRV   | 42.95 | ESLCCYHNNTYRVLLPW*   | GAAAGTCTGTGCTACTACCAATAAACACCTTATAGAGTCTGCTTCCTGAGTGA     |
| P163-1  | PY05542 | H2-Kd | SYIYHTPV   | 9.87  | ENASSIYHTPVLSKVM*    | GAAATGCGCTCTAGCTACATACCACACCCCTGTGCTGAAATCAGTGAATGTGA     |
| P163-2  | PY05544 | H2-Kd | SYKRGAHSL  | 10.72 | ADQDSYKRGHSLFLIA*    | GCTGACCAGGATAGCTATAAGAGAGGCGCCATAGCTGCTCTTCTATAGCATGA     |
| P163-3  | PY05544 | H2-Kd | GYQLMPTY   | 12.34 | ILFLGYQLMPTYIYAS*    | ATCCTGTTTCTAGGCTACATCCAGCTGATGACCTAGATCATATAGTAGCTGTA     |
| P163-4  | PY05544 | H2-Kd | EYFYFRTTI  | 28.62 | YAGPEYFYFRTTIYMQH*   | TACGCAGGCGCTGAGTACTACTTCTATAAGAACCCACATCTATAGCAGCACTGA    |
| P163-5  | PY05545 | H2-Kd | NYIDMKNTI  | 4.65  | PPWENYIDMKNTIRVLI*   | CCTCCTTGGGAAAACATACATAGACATGAAGAACCACCATCCGCGCTTGTATCTGA  |
| P163-6  | PY05545 | H2-Kd | KYMLDENEI  | 9.85  | VEYSKYMLDENEIAQLQ*   | GTAGAATATAGTAAGTACATGCTAGATGAGAATGAGATAGCTCAACTGCAGTGA    |
| P163-7  | PY05545 | H2-Kd | WYWNIFYAI  | 10.65 | KQILWYWNIFYAIAARP*   | AAGCAGATTCATGGTACTGGAACATCTTCTACGCCATAGCAGCTAGACCTTGA     |
| P163-8  | PY05545 | H2-Kd | SYGNMFPHL  | 15.78 | EIDGSGYGNMFPHLTQD*   | GAAATAGATGGTAGCTACGGTAATAACCTTCCTCACTCACTACCCCAAGACTGA    |
| P163-9  | PY05545 | H2-Kd | KHQSFNPI   | 17.38 | EKWWDKHYKHFNFPIRQ*   | GAGAAGTGGGATAAGCACATCCAGAGCTTTAAACCTATCCTTAAGCTAGACTGA    |
| P163-10 | PY05545 | H2-Kd | FYFNIYHL   | 19.17 | PIEGIFYFNIYHLRARF*   | CCTATAGAGGGGATCTACTTTAAACATAATCTACCACCTGAGAGAGTACTTCTGA   |
| P164-1  | PY05545 | H2-Kd | IIDYAKSYI  | 20.07 | AHAKFYIIDYAKSYIFSP*  | GCCCATGCTAAGTTCTATGACTACGCTAAGAGTACATCTTCTCTCCACCTGA      |
| P164-2  | PY05545 | H2-Kd | RFRMRTFENI | 31.76 | YEHERFMRTEFENINDYO*  | TATGAGCATGAGAGATTCTAGAGAACCCTTGAGAACAATAATGACTACCACTGA    |
| P164-3  | PY05545 | H2-Kd | IYYSKMENI  | 34.74 | EAEIYYSKMENIDRMD*    | GAGGCTGAGGAGATCTACTATAGTAAGTAGGAGAACATAGATCGGATGGATTGA    |
| P164-4  | PY05545 | H2-Ld | IPMNYIFQM  | 33.39 | VEKIFPMNYIFQMVQIA*   | GTAGTAGAGAAAATCCCTATGAACCTACATCTTCCAGATGGAGCTAGACTGACATGA |
| P164-5  | PY05556 | H2-Kd | IYNNNNNTIL | 19.86 | DMLPIYNNNNNTILQDLD*  | GACATGCTGCCAATCTATAATAATAATAAACACCATCTGCGAGGACCTAGACTGA   |
| P164-6  | PY05564 | H2-Kd | YGNMNFNI   | 7.18  | EELLYYGNMNFNIIRVD*   | GAGGAACCTCTTGTAACCTGGAACATGAACATTTAAACATATGAGGCTAGACTGA   |
| P164-7  | PY05565 | H2-Kd | YYFNIMSI   | 2.31  | VSGTYYYFNIMSIYSGSM*  | GTGAGCGGGACCTACTACTTTAATAACATAATGAGCATCTACGGGTCAATGTGA    |
| P164-8  | PY05565 | H2-Kd | YIHHMHML   | 6.88  | EPVTTYIHHMHMLGLQR*   | GAGCCAGTGACCTACTACATCCACCACCATGCGCATGCTGCTGAGGAGGTGA      |
| P164-9  | PY05565 | H2-Kd | KYLNQONEI  | 11.41 | LNLLKYLNQONEIMRGF*   | TTAAACCTTATAAAGTACCTGAATGAGCAGAGATGAGATAATGAGGGGGTTTGA    |
| P164-10 | PY05565 | H2-Kd | YKYNFYNNI  | 12.15 | YADIGYKYNFYNNHOGY*   | TATGCTGACATAGGCTATAACTACTACTTTAATAACATCCACCAAGGCTACTGA    |
| P165-1  | PY05565 | H2-Kd | IYVSSKHII  | 13    | AVVLIVYVSSKHIIASGP*  | GCCGTAGTACTAATCTACGCTGAGTAGTAGAGCACATAATAGCGCTCAGGGCCGTGA |
| P165-2  | PY05565 | H2-Kd | LYNNNLNNI  | 13.53 | NTMSLYNNNLNNIRVQA*   | AACACCATGAGTCTGTATAATAACTACCTGAATAACATAAGGCTCCAGCCCTGA    |
| P165-3  | PY05565 | H2-Kd | YYVKVAKKI  | 22.91 | TGEFYYYVKVAKKIFEPK*  | ACTGGTGAATCTACTACTATAAGGTAGAGTACATCTTCCAGATGGAGTGAACATGA  |
| P165-4  | PY05565 | H2-Kd | IQTNNYSSI  | 25.48 | HSLFQITQNNYSSICESN*  | CATTCTGCTGTTCACTCAGACTAATAACTATAGTAGCATCTGCTGAGAGTAATTGA  |
| P165-5  | PY05565 | H2-Kd | KYNNQNQDI  | 26.34 | VPGEKYNNTQNDIKGDO*   | GTGCGTGGTGAGAAGTATAACACATAACCCAGAATGACATAAGGCTGAGCACTGA   |
| P165-6  | PY05565 | H2-Ld | IPNYPNIPP  | 21.55 | VTASIPNYPNIPPQDDQ*   | GTAACCGCTAGCATCCCTAACATAAATACCTCCCTCTTCCAGCAGGATGACTGA    |
| P165-7  | PY05567 | H2-Kd | FYIGLVVVL  | 29.38 | GLHEFYIGLVVVLIRAG*   | GGCCTTCATGAATCTACATAGCGCTAGTAGTGTGCTGCGCGCGCGTGAAGTGA     |
| P165-8  | PY05567 | H2-Kd | AYFMTLRVL  | 49.4  | QOLVAYFMTLRVLGRRK*   | GTGCAACTAGTAGCCTACTTCTAGTACTAGACTAGTGTGCTAGGTCGCCGTAAATGA |
| P165-9  | PY05610 | H2-Kd | YYLYFYFNI  | 9.25  | RLPLYLYFYFNIYPHPP*   | AGACTGCCCTTATACTACCTGCTACTACTTCTATAACCTACCCCTCAGCTGGTGA   |
| P165-10 | PY05610 | H2-Kd | LYLNALYFI  | 18.47 | HVAILYLNALYFIRRLC*   | CATGTAGCGATCCTGTACTGAACGCCCTGTACTTCAATAAGAAGCTGTGTTGA     |
| P166-1  | PY05610 | H2-Kd | KYHMNNELI  | 23.23 | CTKKKYKHMNNELILQGV*  | TGTACTAAAAAGAGTACCACATGAATAAGGAGCTGATCTTGTGTGGAGTGTGA     |
| P166-2  | PY05610 | H2-Ld | KPMMLVNYL  | 24.98 | LNVAAMPLVNYLLQPS*    | CTGAACGTAGCCATGCGCTATGCTAGTGAACATACATCTGCTCAACCTCTGTA     |
| P166-3  | PY05612 | H2-Kd | NYMNSKTYL  | 5.99  | RYEANYMNSKTYLLEKT*   | AGATATGAGGCTAACTACATGAATAGTAAGACCTACCTGCTAGAGAAAAACATGA   |
| P166-4  | PY05612 | H2-Kd | MYQNAHNM   | 10.93 | LFLSMYQNAHNMMLWDH*   | CTGTTTCTGAGCATGTACCAGAACGCCCATAAACATGCTGTGGGATCACCATGTA   |
| P166-5  | PY05612 | H2-Kd | YAMNNAFPI  | 32.31 | TFEEMYAMNNAFPIALV*   | ACCTTTGAGGAGTACGCCATGAATAACCTTCGCCCTCATCTACGCCCTAGTCTGA   |
| P166-6  | PY05620 | H2-Kd | KYKHNPSLI  | 10.15 | FCEQKYKHNPISLIGFD*   | TTCGTGAGCAGAGAAGTATAAGCCATAACCCCTAGCCCTGATAGGTTTGTAGACTGA |
| P166-7  | PY05633 | H2-Kd | YVNSVVEKI  | 16.79 | SKGWYVNSVVEKIVFWK*   | AGTAAGGGCTGGTACTATAATAGTAGCGGTAGAGAAGATAGTGTGTTGGAATGA    |
| P166-8  | PY05642 | H2-Kd | SYHVSCLGL  | 41.3  | LTRQSYHVSCLGLGSTN*   | CTGACTCGACAAAGCTACCACGTGAGCTGCCTAGGCCATAGGCTCAACTAATTGA   |
| P166-9  | PY05680 | H2-Kd | SYLENESHI  | 4.46  | YPQLSYLENESHILQPD*   | TATCCTCGCTGAGCTAGCTAGAGAATGAGAGGCCACCTCAGCGCTGCCTGATTGA   |
| P166-10 | PY05680 | H2-Kd | CYLVDTSSI  | 7.68  | ATCVCYLVDTSSINLEP*   | GCCACGTGTGTTGCTACCTAGTAGACACTAGTAGCATAAACCTGCCTCGAATGA    |
| P167-1  | PY05680 | H2-Kd | SYNYKHNNI  | 24.62 | GRILSYNYKHNNIIELE*   | GGCGGCATTCTGAGCTATAACTATAAGCATAAAGCATAAATAGAGGACTTGTGA    |
| P167-2  | PY05680 | H2-Kd | MYEPLIGPI  | 41.15 | TSEKMYEPLIGPIFVDD*   | ACTTCTGAAAAGATGTATGAGCCTCTGATAGGCCCTATCTCTGATAGATGACTGA   |
| P167-3  | PY05680 | H2-Ld | YPYQYSFFL  | 22.29 | KCDDYPYQYSFFLAQRM*   | AAGTGTGATGACTACCCCTACCAGTATAGCTTCTTCTAGGCCAGCGCATGTGA     |
| P167-4  | PY05683 | H2-Kd | LYHSDTSEI  | 5.65  | VKRSSYHSDTSEIHNEN*   | GTGAAGCGCTCTAGCTACCATAGTACAGCTAGTGAATAGCTGAGAACCCCGTGA    |
| P167-5  | PY05683 | H2-Kd | LYVPYSYII  | 27.11 | YGGSLYVPYSYIISHT*    | TACGGTGGATCTCTGTAAGTGCCTTTAGCTACATGAATACCTGCTCACACTGA     |
| P167-6  | PY05696 | H2-Kd | SYFSAIPTI  | 2.27  | YQSMYSYFAIPTISDD*    | TACCAATCCATGAGCTACTTTAGCGCCATCCCTACCATAACTAGTGTAGTACTGA   |
| P167-7  | PY05696 | H2-Kd | YIYSFRNEI  | 4.53  | NSSLYIYSFRNEIKOPI*   | AACTCCTCTCTCTACTACTAAGCTTTAGAAGTAGATAAAGCAGCAATATGA       |
| P167-8  | PY05696 | H2-Kd | FYLDNPSAL  | 7.15  | AMVHFYLDNPSALLVPC*   | GCCATGGTGCACTCTACCTAGATAAACCCTAGGCGCCGTGCTAGTGCCCTGCTGA   |
| P167-9  | PY05696 | H2-Kd | KYFINYFOL  | 8.97  | ETRCKYFINYFQLMRVH*   | GAGACCCGCTGTAAAGTACTTCAATAACTACTTCCAGCTGATGAGGGGTGCACTGA  |
| P167-10 | PY05696 | H2-Kd | YKYNLNSL   | 12.43 | NETPYKYNLNSLFLTL*    | AATGAAACCCCATACTATAAGAAGCTGCTGAATAGCGCTGTCTTCCGACCTCTGA   |
| P168-1  | PY05696 | H2-Kd | QYFFQPNFL  | 16.6  | LYFQQYFPQFNFLAEKQ*   | CTGTACTTCCAAACAGTACTTCCCTCAGTTTAACTTCTAGCTGAAAAGCAGTGA    |
| P168-2  | PY05696 | H2-Kd | YIHNQNLTL  | 21.64 | GYRANYIHNQNLTLSANF*  | GGATATCGCGCTAACTACATAGATAAATAACCTGACCTGAGTGTCTAATTCTGA    |
| P168-3  | PY05696 | H2-Kd | LYNYVIPOI  | 24.99 | DLFSLYNYVIPIQDROI*   | GAGCTGTTCTCTCTGTATAACTACGTGATCCCTCAGATAGATAGAGAACATGA     |
| P168-4  | PY05696 | H2-Kd | SYAELCEEI  | 30.58 | KFFTSYLAELCEEIKPR*   | AAGTCTTCACTAGCTACGCTGAGCTGTGAGGAAGATAGTAAAGCCAGCTTGA      |
| P168-5  | PY05696 | H2-Ld | SPYNYFYNF  | 20.48 | LQGQSPYNYFYNFHTCT*   | CTAGGCCAACCTAGGCCCTTAACTTCTACTTTAACTTCCACACATGTACCTGA     |
| P168-6  | PY05748 | H2-Kd | IYQAMYNVI  | 4.7   | ERRYIYQAMYNVIAASS*   | GAGCGGCGCTACATCTACCAAGGCCATGTATAACCGTGATAGCTGCCTCTAGCTGA  |
| P168-7  | PY05748 | H2-Kd | KYIPILEDL  | 31.23 | HVIKIYPILEDLLSGA*    | CAGTGATAATAAAGTACATCCCTATCTGATAGGACCTGTTGTCTGGCGCGTGA     |
| P168-8  | PY05748 | H2-Kd | YSYCHKYVL  | 37.37 | LMVQSYCHKYVLYLQV*    | TAAAGTGTGAGAGCTATAGCTGCCATAAGTAGCTGCTGTATCTCAGGTTTGA      |
| P168-9  | PY05748 | H2-Ld | YSGGISYPL  | 37.86 | KFWAYYNGISYPLDVVY*   | AAATCTGGGCTTACCCTAACGGCATAAGCTACCTGCTAGTGTGTTACCTTTGA     |
| P168-10 | PY05772 | H2-Kd | KYICNSYNI  | 2.94  | CHSTKYICNSYNIRKAF*   | TGCCATTCTACTAAGTACATCTGTAATAGCTATAACATCTGCTGAAAGCCCTGTA   |
| P169-1  | PY05772 | H2-Kd | KYYVNNYLY  | 6.77  | VHIKKYVNNYLYLHFFE*   | GTGCACATAAAGAAGTACTACGTGAATAACTACTACCTGCATATGTTTGAAGTGA   |
| P169-2  | PY05772 | H2-Kd | FFMNSKFNI  | 17.22 | KSPAFFMNSKFNIVROK*   | AAAAGCCCGCATCTTCTCATGAATAGTAAGTTTAAACATAGTGAGACAGATCTGA   |
| P169-3  | PY05772 | H2-Kd | FYNAYVDVL  | 22.23 | HLDDFYNAYVDVLFKST*   | CACCTAGATGACTTCTATAACGCCCTACGTAGACGTGCTGTTTAAAGTCAACCTGA  |
| P169-4  | PY05772 | H2-Kd | FINHRYTNI  | 23.08 | LANYIYFINHRYTNIYTMG* | CTAGCTAACTATATCTATAACCATAGACTACACTAACTATATAGCAAGCATGTGA   |
| P169-5  | PY05772 | H2-Kd | FYFELTGLI  | 28.81 | AKDLFYFELTGLICEER*   | GCTAAGGATCTCTTCTACTATGAGCTGACCGGCCTGATCTGTGAAGAAGCCGTGA   |
| P169-6  | PY05772 | H2-Kd | NNYNVKNIEI | 31.98 | EVSLNNYNVKNIEISQDL*  | GAGGTGTCACTGAACATATAAATACGTGAAGCAATGAGATGCTGCCAGGACTGTGA  |
| P169-7  | PY05811 | H2-Kd | IYKNNLSI   | 19.64 | QHKIKYKNNLSIWIWER*   | CAGCATAAAGAAGTCTATAAGAATAACCTGCTGAGCATCTGGATAGAGCGGCTGA   |
| P169-8  | PY05811 | H2-Kd | YVYNLFLNL  | 33.07 | FATQVYVYNLFLNLNPEY*  | TTGCTACTCAGGTGTACTACGTGAACCTGTTTAAACCTGAATCCTGAGTACTGA    |
| P169-9  | PY05811 | H2-Kd | KSFSNISNI  | 44.73 | VLPAKFSNISNIDDSG*    | GTGCTGCCCGCTAAGAGCTTTAGTAACATAAGTAACATAGATGACTCGGGGTGA    |
| P169-10 | PY05818 | H2-Kd | MYFCVAOKI  | 8.74  | IVKTMFYFCVAOKIGRAI*  | ATAGTGAAAAAATGTACTTCTCGGTAGACCAAGAGATAGGACGGGCTACTGA      |
| P170-1  | PY05841 | H2-Kd | FYYIYITNI  | 8.02  | GKFFVYIYIITNINVAL*   | GGTAATTCGTTTTCTACTACTACATAATAACTAAACATAAAGTAGCACTGTGA     |
| P170-2  | PY05841 | H2-Kd | IYNTITNSI  | 16.25 | QGILYIYNTITNSINPSD*  | CAGGGCATCCTGATCTATAACATAACTAATAGTAACATCCCTAGTGACGGGTGA    |
| P170-3  | PY05841 | H2-Kd | MYRNYDYDI  | 22    | ALEMMYRNYDYDIGWIS*   | GCCCTAGAGATGATGTATAGAACTACTAGTACATAGCTAGGCTGGATAAGTTGA    |
| P170-4  | PY05841 | H2-Kd | IYLTSCFIL  | 33.13 | TPRSIYLTSCFILPWIE*   | ACCCCCCGGTCCATCTACCTGACTAGCTTCTGCATCCTGCCCTGGATAGAGTGA    |
| P170-5  | PY05843 | H2-Kd | FYNNQDSFI  | 11.93 | SCDNFYNNQDSFITFLD*   | TCAATGTATAATTTCTATAATAACCCAGGATAGCTTCTATAACCATCTTGAATGA   |
| P170-6  | PY05843 | H2-Kd | NYLSYRHPH  | 12.31 | EPGHNYLSYRHPHRELS*   | GAGCCTGGACATAACTACCTGAGCTATAGAACCCCTACCGTGAACCTTTCATGTA   |
| P170-7  | PY05843 | H2-Kd | NIYNPFSL   | 19.4  | VRRNNYNIYFPFSLVAEP*  | GTGAGAAGGAATAACTACATAAACCCCTTTTAGCTGCTGATAGCTGAACCATGA    |
| P170-8  | PY05853 | H2-Kd | FYSSNKINI  | 15.26 | EATEFYSSNKINIFEID*   | GAAAGCACTGAATTTCTATAGTAGTAATAAGATAAACATCTTTGAGATGAGATTGA  |
| P170-9  | PY05853 | H2-Kd | HYFNLDNYL  | 20.87 | MRMQHYFNLDNYLHAVA    | ATGAGAATGCACACTACTTTAACTAGATAACTACCTGCATCGCTAGCACTGA      |
| P170-10 | PY05859 | H2-Kd | SYNKNNGI   | 9.52  | RMISSYNKNNGINGMLQ*   | CGGATGATCTCTAGCTATAATAAGAATAATAACGGCATAATGGGTCTCCAGTGA    |
| P171-1  | PY05859 | H2-Kd | KYLTSOFFL  | 9.87  | EDANKYLTSOFFLVSPF*   | GAAAGTGCTAATAAGTACCTGACTAGCCAGTCTTCTGATGTCTCTCCCTGTA      |
| P171-2  | PY05859 | H2-Kd | NYLDNYFIE  | 17.74 | DHFVNYLDNYFIEEWG*    | GATCACTTCGTGAACCTACCTAGTAACACTACTTCAATAGTAGGAGTGGGGTTGA   |
| P171-3  | PY05881 | H2-Kd | GYKSGMSHI  | 20.26 | LLRPGYKSGMSHIKRTS*   | TTGTTAAGACCTGGCTATAAAGAGCGGCATAGGCCACATAAAGCCGCACTAGCTGA  |
| P171-4  | PY05897 | H2-Kd | SYNTFCEI   | 3.88  | PNATSINTFCEINTLSL*   | TGTTATGCAACTAGCTACATAAACACCTTCTGTGAGCTGAACACATCCCTTGA     |
| P171-5  | PY05897 | H2-Kd | AYILNVNVI  | 12.06 | RGVPAYILNVNIVISLCQ*  | CGAGGCTGCGCTGCCTACATCCTGAACGTGAACGTGATCTCATGTCTAGGCTGA    |
| P171-6  | PY05897 | H2-Kd | GYYMKVYML  | 26.81 | VROCGYMKVYMLMLKLP*   | TCCGCTCAGTGCGGCTACATGAATAAGGTGTACATGCTGATGAGAGGCTGGGTGA   |
| P171-7  | PY05897 | H2-Kd | FYFRKNYKL  | 36.44 | LFTKFYFRKNYKYLATY*   | CTGTTTACTAAGTTCTACTTTAGAAAGAACTATAAGCTAGCCCTGACCTATTGA    |
| P171-8  | PY05897 | H2-Kd | KHNNNYSYI  | 43.59 | VITHKHNNNYSYILHSH*   | GTGATAACCATAGCATAATAAATAACTATAGCTACATCTCCATTCACATTGA      |
| P171-9  | PY05908 | H2-Kd | MYNNNINVI  | 4.87  | LADCMYNNNINVIDDHP*   | TTAGCTGATTGCATGTATATAATAAACAATAGCTAGATAGTACGACCACCCCTGA   |
| P171-10 | PY05908 | H2-Kd | FYLNISKNEI | 6.19  | NDFAFYLNISKNEIKVPF*  | AATGACTTTGCTTTTACCTGAATAGTAAGAAATGAGATAAAGCCGCTGTTCTGA    |
| P172-1  | PY05908 | H2-Kd | KDNFKYFNIS | 13.42 | FDISYPE*             | GATAAGAAATTTTAACTACTTTAAACATAAGCTTTGACATCTCATACCGCTAGTGA  |
| P172-2  | PY05908 | H2-Kd | KQFRDHTNI  | 22.73 | LTCKKQFRDHTNIAILL*   | CTGACCTGTAAGAAGCAGTTTGAAGACCCACATCAACATAGCAATTTCTGCTGTA   |
| P172-3  | PY05908 | H2-Kd | YYINHFKKL  | 26.32 | LLLYLYINHFKKLFOVG*   | TTCCTCTACTGTACTACATAAACCACTTTAAGAAGCTGTTTCCAGTAGGTTGA     |

|         |         |       |            |       |                      |                                                            |
|---------|---------|-------|------------|-------|----------------------|------------------------------------------------------------|
| P172-4  | PY05908 | H2-Kd | LQFHNFIHII | 31.14 | LQKSLQFHNFIHILTGS*   | CTGCAGAAGTCTCTGCAGTTCACATAACTTCCACATAATCCTAACCGGCTCATGA    |
| P172-5  | PY05908 | H2-Kd | KYSAIFSF   | 36.92 | EASEKYSIAIFSFFAGQA*  | GAGGCTTCTGAGAAGTATAGCGCCATCTTTAGCTTCTTCGCTGGACAGGGGTGA     |
| P172-6  | PY05911 | H2-Kd | SYFCTEKKNI | 15.69 | EVKDSYFCTEKKNILOS*   | GAGGTGAAGGATAGCTACTTCTGCACGTGAAGAAGACATCTAACCCAATCATGA     |
| P172-7  | PY05911 | H2-Kd | IYILNFGEI  | 19.9  | QSRREIYILNFGIYCP*    | CAGTCTCGTGAATCTACATCCTGAACTTCGGTGAGATCTATTGTCCATTGTGA      |
| P172-8  | PY05911 | H2-Kd | YYNYNISAV  | 29.65 | FAAHYYNYNISAVFKA*    | TTTGCAGCTCACTACTACACTAACTACATAAGCGCGGTGTTTAAAGCACATTGA     |
| P172-9  | PY05911 | H2-Kd | YYSFDTLFI  | 31.67 | EDESYYFDTLFIIFGLY*   | GAGGATGAGCTCTACTACTATAGCTTTGACACCCCTGTTCATCTTCGGGTGTATTGA  |
| P172-10 | PY05911 | H2-Ld | IPHPALSLF  | 20.23 | AKKNIPHPALSLFANN*    | GCTAAAAAGAACATCCCTCACCCCTGCCCTGAGCGCTGTTTCGCTAATAATTGCTGA  |
| P173-1  | PY05915 | H2-Kd | KYHDLVYGI  | 17.39 | PDCYKYHDLVYGPILP*    | CCTGACTGCTATAAGTACCACGCTGACGCGCCATCTCCACACCGCTTTGA         |
| P173-2  | PY05925 | H2-Kd | FYYNMEKSL  | 12.97 | YETSFYYNMEKSLTRL*    | TATGAGACTTCCTTCTACTATAACATGGAGAAGAGCGCTGACTCGACTTTTATGA    |
| P173-3  | PY05925 | H2-Kd | KYNELIDEL  | 33.59 | KPKRKYNELIDELHEL*    | AAACCTAAGCGTAAAGTATAATGAGCTGATAGATACGCTGCATGACTAGGGTGA     |
| P173-4  | PY05947 | H2-Kd | FYQSTLSLV  | 18.32 | RPFCFYQSTLSLVTPK*    | AGGCCTTCTGCTTCTACCAGAGCACCCCTGAGCCTAGTGACCGCCCTAAGTGA      |
| P173-5  | PY05957 | H2-Kd | LYFANEREI  | 35.45 | AGFRLYFANEREIPLY*    | GCCGGGTTTAGACTGTACTTTCGCTAATGAGAGAGAGATAGCGCTGTACTCATGA    |
| P173-6  | PY05957 | H2-Kd | IYQSTLSLV  | 43.57 | MCAGIYQSTLSLVPV*     | ATGTGTGCTGGCATCTACCAGAGCACCCCTGAGCCTAGTGCCCGCAGTGAGCTGA    |
| P173-7  | PY05971 | H2-Kd | KYDALKYTI  | 28.05 | DLGAKYDALKYTIME*     | GATCTAGGTGCTAAGTATGACGCCCTGAAGTACACCATAAATGGAAGGTGAGTGA    |
| P173-8  | PY05971 | H2-Kd | IYAATKDYL  | 38.32 | LLVPIYAATKDYLFKAL*   | CTACTAGTGCCATATCTACGCCGCCACTAAGGACTACCTGTTTAAAGCCCTGTGA    |
| P173-9  | PY05975 | H2-Kd | KYKHYHGP   | 5.32  | AKGDKYKHYHGPINVM*    | GCTAAGGGTGATAAGTACATAAAGTACCACGCCCTGATAAAGCTGATGGTATGA     |
| P173-10 | PY05975 | H2-Kd | FYNPLKMMNI | 8.07  | SSYQFYNPLKMMNISHL*   | TCTAGCTACCAAGTTCTATAACCCCTCTGAAGATGAACCATGACATCTGATTTGA    |
| P174-1  | PY05975 | H2-Kd | KYHGPINEL  | 26.03 | HQVIKYHGPINELGLLE*   | CATCAGGTGATAAAGTACCACGCCCTATAAATGAGCTAGGCTGCTAGAGTGA       |
| P174-2  | PY05975 | H2-Kd | MYAAKIHKI  | 31.73 | FQTDMYAAKIHKISEKL*   | TTCCAGACTGATATGTACGCCGCTAAGACTCATAGAATGAGTGAAGAAAGCTTGA    |
| P174-3  | PY05975 | H2-Kd | QYYNGGGTL  | 35.27 | STGTQYYNGGGTLQLV*    | STGTQYYNGGGTLQLV*                                          |
| P174-4  | PY05975 | H2-Ld | YPIFNFYNI  | 22.46 | LLLYPIFNFYFNITNL*    | CTATTGCTTTACTACCCTATCTTTAACTACTTTAAACATAACTAATCCTTTGTA     |
| P174-5  | PY05977 | H2-Kd | KYMKSNVLE  | 5.83  | KHAMKYMKSNVLEILMI*   | AAACACGCCATGAAGTACATGAAGAGTAAGCTAGAGCTAGCTTCAATGATTTGA     |
| P174-6  | PY05977 | H2-Kd | VYFAGAGII  | 13.32 | GNGAVYFAGAGIIPGSD*   | GGAATACGGAGCTGTGTACTTCGCCGGCGCCGGGCATAATCCCGGTAGTGACTGA    |
| P174-7  | PY05977 | H2-Kd | WYFNLNQNI  | 19.84 | RIKANYYFNLNQNIILAM*  | CGGATAAAAGCTAACTACTTTGATAATAACCCAGACAGTCTTAATAGCGATGTGA    |
| P174-8  | PY05977 | H2-Kd | NLYLWGVVWL | 23.72 | YLRKNYLWGVVWLGPRL*   | TACCTTCGTAAGAAGTACCTGTGGGGCGGTGTGGGTGCTAGGCCCTCGTGACTGA    |
| P174-9  | PY05977 | H2-Kd | SYFNPIPTI  | 26.49 | RDIELNYFNPIPTIOWT*   | CGTGACATAGAGCTGTATAAAGTACCCCTATACCCCTAGTACGCTGAGCTTCTGTA   |
| P174-10 | PY05977 | H2-Kd | KYGLYNYPI  | 31.99 | PISFYKGLYNYPIPTAI*   | CCGATAAGCTTTAAGTACGCCCTGTATAAAGTACCCCTATAAAGTACCCGCAATTTGA |
| P175-1  | PY05977 | H2-Kd | KFYSNKQNI  | 36.81 | LGRGKIFYSNKQNIACLE*  | TTAGGTAGGGGTAAAGTTCTATAGTAATAAGCAGAACATCCTAGAGAAGTGA       |
| P175-2  | PY06001 | H2-Ld | WPIYNRHPI  | 33.24 | TKPPWPIYNRHPILSL*    | ACTAAACCTCCATGGCCATCTATAATAGACACCCCTATCCTTTCACTAGTCTGA     |
| P175-3  | PY06005 | H2-Kd | LYYANERTI  | 21.25 | LESELYYANERTISFVI*   | CTAGAATCTGAGCTGTACTACGCTAATGAGAGAACCCATCTCTTTGTGATCTGA     |
| P175-4  | PY06010 | H2-Kd | KYNDWYTTL  | 5.17  | SSKIKYNDWYTTLSFAA*   | AGTTCTAAGATAAAGTATAATGACTGGTACAGACACCCCTAGCTTTCCTGCGCTGA   |
| P175-5  | PY06010 | H2-Kd | WYTTLYETL  | 29.37 | FGDSWYTTLYETLCGPG*   | TTTGGTGATAGCTGGTACACCACCCCTGTATGAGACCCGTGTGGCGGACCTGGCTGA  |
| P175-6  | PY06037 | H2-Kd | FYYENRNYV  | 36    | SYPMFYENRNYVVGRT*    | AGTTACCCCATGTTCTACTATGAGAATAAGAACTACGTAGGTAGAACCAATGA      |
| P175-7  | PY06041 | H2-Kd | SYSNNTNGL  | 19.52 | SSANSYSNNTNGLLADI*   | TCCTCTGCTAATAGCTATAGTAATAACACTAAGCGGCTGCTAGCTGACATATGA     |
| P175-8  | PY06041 | H2-Kd | RYMSLSNCL  | 33.04 | SLDPRYMSLSNCLAYNG*   | TCTCTAGACCCCTAGATACATGAGCCTGAGTAACTGCCTAGCATATAATGGATGA    |
| P175-9  | PY06041 | H2-Kd | SFFENFEKI  | 49.23 | FVPGSFFENFEKILND*    | TTGCTGCTGCTGAGCTTCTTTGAGAAGTCTGAGAAGATCCTGAATGACACCTGA     |
| P175-10 | PY06045 | H2-Kd | FYESTLSLGE | 12.76 | DADSFYESTLSLGEEL*    | GACGCTGACTCCTCTATGAGAGCACCCCTGAGCCTGATAGGTGAAGAGCTGTGA     |
| P176-1  | PY06045 | H2-Kd | LYFVNERSI  | 26.46 | VTILYFVNERSILSGN*    | GTAACCATAACTCTGACTTCTGTAATGAGAGAAGCATCTTATCCGGTAACTGA      |
| P176-2  | PY06049 | H2-Kd | QYINLNETI  | 11.08 | IMTYQYINLNETIEIYS*   | ATAAGTACTACCAGTACATAAACCTGAATGAGACACATAGAATATAGATCCCTGA    |
| P176-3  | PY06049 | H2-Kd | NYFCNPFEL  | 12.85 | GESLNYFCNPFELRLCE*   | GGTGAATCACTGAAGTACTTCTGTAACCTTTTGAAGTCTGAGCTGCTGTGAATGA    |
| P176-4  | PY06049 | H2-Kd | IYLNKNIYI  | 29.99 | DEIVIYLNKNIYVLGER*   | GATGAAATAGTGATCTACCTGAAGACATCTACTACCTAAGGGGGTGAAACCTTGA    |
| P176-5  | PY06049 | H2-Kd | NYLNKNII   | 45.64 | HPDCNYLNKNIIELTQ*    | CACCCGTGACTGTAACTACATAAATAAGAAATAACATAATAGAGCTGACACAGTGA   |
| P176-6  | PY06049 | H2-Ld | KPMINNYNF  | 17.76 | PISONPMINNYNFGLVI*   | CCCATAAGCCAAACCCCTATGATAAATAAATACTAATACCTTCGCGCTATGATGATGA |
| P176-7  | PY06067 | H2-Kd | KYIVNIASL  | 4.24  | NEEKKYIVNIASLLIYQ*   | AATGAAGAAAAAAGTACATAGTGAACATAGCTAGCCTGTTAATGACAGGTGA       |
| P176-8  | PY06067 | H2-Kd | KYIIDNSNI  | 6.89  | PHKPKYIIDNSNIWNLV*   | CCCATAAGCCCTAAGTACTACATAGATAATAGTAACATCTCGGAACCTAGTGTGA    |
| P176-9  | PY06067 | H2-Kd | KYKSCLEYI  | 18.36 | CAECKYKSCLEYIPDHD*   | TGCCGTGAATGTAAGTATAAGAGCCTGTGTGAGTACATCCCTGACCATGATGA      |
| P176-10 | PY06076 | H2-Kd | FYNNIYTYI  | 3.19  | YVPSFYNNIYTYIKINC*   | TAGTCTCCTAGCTTCTATAATAACATCTACGACCTACATAAAATAAATGTGCTGA    |
| P177-1  | PY06076 | H2-Kd | TYSNKTKSI  | 8.62  | GGSGATYSNKTTSIPL*    | GGTTCAGGCGCAACCTATAGTAACACTAAGACTAGCATTAATTCCTCTCTTCTGTA   |
| P177-2  | PY06076 | H2-Kd | SYFNFDFII  | 8.7   | TVALSIFYNFDFIITGL*   | ACTGTAGCCTTGAGCTACTACTTTTAATGACTTCTATAATCACTCCGGGATCGCTGA  |
| P177-3  | PY06076 | H2-Kd | YNNINLYTL  | 10.01 | TSFGYYNNINLYLCSYK*   | ACTAGCTTTGGATACTATAACATAAACCTGTACACCCGTGTGATGTTATAATGA     |
| P177-4  | PY06076 | H2-Kd | FYNSYPFII  | 12.61 | ALATFYNSYPFIIVVAD*   | GCCCTAGCGACATCTATAATAGCTACCTTCTCATATCTGGGTAGCTGACTGA       |
| P177-5  | PY06076 | H2-Kd | IYASNFENI  | 16.03 | VGHGIYASNFENIDQVG*   | GGCGTCCACGGGAATCTACGCTAGTAACTTTGAGAACATGACACCGGATAGGATGA   |
| P177-6  | PY06076 | H2-Kd | FYFNSYPFI  | 18.48 | VFSYFYFNSYPFISCOE*   | GTTTTTCTTGCTACTTCTATAATAGCTACCCCTTGTCTCTCTGTAGGATGA        |
| P177-7  | PY06076 | H2-Kd | RYETTNIISI | 37.78 | VTGLRYETTNIISIQATA*  | GTGACCGGCTCGAGATATGAGACCACTAACATAAGCATCCAAGCTACTGCGTGA     |
| P177-8  | PY06087 | H2-Kd | HYINVIKSI  | 7.21  | FGSLHYINVIKSIKSVK*   | TTGCGTAGCCTCCACTACATAAACCGTGATAAAGAGCATAGAGTCCGTGAAATGA    |
| P177-9  | PY06087 | H2-Kd | YYMNNIKLI  | 14.96 | AVKHYYMNNIKLLIYVD*   | CGCGTGAACATTAACATGATATAATAACATCTACGACCTACATAAAATGTAGCTGA   |
| P177-10 | PY06087 | H2-Kd | YYYYNLNLM  | 15.85 | AHEQYYYYNLNLMQHDP*   | GCACATGAGCAGTACTACTACTATAACCTGAATAAAGTACGACATGATCCTTGA     |
| P178-1  | PY06087 | H2-Kd | MYNNIKLNI  | 26.13 | REQLMYNNIKLNIEGSE*   | CGTGAGCAGTTGATGTATAAATAACATAAAGCTAGATAGATGACAGATCGTAGTGA   |
| P178-2  | PY06110 | H2-Kd | KYGFVITTL  | 11.72 | LASLKYGFFVITTLALL*   | CTAGCTAGTCTGAAGTACGGCTTCGTGATAACCCACCTGTACGCTGCTGCTGTGA    |
| P178-3  | PY06110 | H2-Kd | KYNLFEFII  | 12.02 | QPVDKYNLFEFIIQSW*    | CAGCCAGTAGATAAGTATAACTTCTGTTTGAAGTCTAATAGTCCAGAGCTGGTGA    |
| P178-4  | PY06117 | H2-Kd | RYNYNYVTQI | 2.74  | LEYPRYNYNYVTQIQEE*   | CTAGAATAACCTAGATACTATAACTACGTGACCCAGATCCAGAGGAAATCTCTGA    |
| P178-5  | PY06117 | H2-Kd | HYIALGPHI  | 5.79  | TLIHYIALGPHISAKS*    | ACTCTCTATCTCACTACATAGCCCTAGGCCACTTCACTCTGCTAAAAGTTGA       |
| P178-6  | PY06117 | H2-Kd | YYNYVTQIL  | 12.93 | MSTRYYNYVTQILPVFP*   | ATGTCTACTCGCTACTATAACTACGTGACCCAGATGCTGCCAGTGTCCCTCTGA     |
| P178-7  | PY06117 | H2-Kd | RYQIEHESL  | 14.87 | TSSARYQIEHESLRMVL*   | ACATCGTCAAGTATAGCAGGAGATCCATGAGAGCCTGCGCATGGTGTATGATA      |
| P178-8  | PY06117 | H2-Kd | YKKLANEII  | 20.87 | NHAAYYKKLANEIIYFT*   | AATCATGCGCCCTACTATAAGAAGACTAGTAACTAGATCTACTTCACTAGCTGA     |
| P178-9  | PY06117 | H2-Kd | KYFSSTPKI  | 27.26 | ITWEKFFSSTPKIQMKT*   | ATAACCTGGGAGAAGTCTTTAGTAGCACCCCTAAGATCCAAATGACAGCTGTGA     |
| P178-10 | PY06117 | H2-Kd | SYQPNVEYMI | 32.32 | DVDESQPNVEYMIPLVI*   | GACGTAGATGAGAGCTACACGCTCAACGTAGATGATGATGATGATGATGATGATGA   |
| P179-1  | PY06117 | H2-Kd | IYVHILNLI  | 32.75 | LQKEIYVHILNLIFTLA*   | CTGCAAAAGGAAATCTACGTGCACATCCTGAACCTGATCTTTACTTGACGCTGA     |
| P179-2  | PY06117 | H2-Kd | RSFMNRCIT  | 45.15 | NIPHRSMFNRCTIKHAG*   | AATATTCCACATAGAAGCATGTTTAAATAGTACACCATGAACCAACGACGAGCTGA   |
| P179-3  | PY06117 | H2-Kd | CYSRRSSAL  | 45.39 | AQKMCYSRRSSALLRFT*   | GCACAAAAAATGTGCTATAGTAAAGAAGTAGCGCCCTGCTGCGCTTTACTTGA      |
| P179-4  | PY06142 | H2-Kd | SYNMNRNLI  | 4.06  | DGSCSYNMNRNLLNEEK*   | GACGGTTCCTGTAGCTACTATAACATGAGAAATAACCTGAATGAGGAGAAGTGA     |
| P179-5  | PY06142 | H2-Kd | FYLYITNTI  | 6.92  | DIHGFLYLYITNTIAPLM*  | GATATCCATGGCTTCTACCTGTACATAAAGTACACCATGACCTGCTCTAATGTGA    |
| P179-6  | PY06142 | H2-Kd | SYNLFSSNI  | 17.98 | KRGRSYNLFSSNIRLLE*   | AAAAGAGGTAGGAGCTATAACCTGTTTAGTAGTAACATAAGACTGTAGAGCTGA     |
| P179-7  | PY06146 | H2-Kd | TYFSNQSSI  | 2.79  | IPVSTYFSNQSSIASDA*   | ATCCCATGAGTACCTACTTTAGTAACCAAGTACGATAGCTAGTGAACCGTTGA      |
| P179-8  | PY06146 | H2-Kd | YYVTSIVII  | 7.54  | ESSYVVYTSIVIIHDDA*   | GAAAGTTCTTATTACTACGTGACTAGCATAGTGATATAATCCACCATGATGCGCTGA  |
| P179-9  | PY06146 | H2-Kd | WFNKVISTI  | 23.21 | LAPPWFNKVISTIRSGY*   | CTAGCACCCACCTTGGTTTAAAGGGTATAGAAGCACCATGAAGTACAGGCTACTGA   |
| P179-10 | PY06160 | H2-Kd | WFNKNHISL  | 11.27 | NIVGRWYNHISLLWLF*    | AACATAGTAGGTAGATGGTATAACCATAGTAAAGTACCGCTGGCTTTTTCGTGA     |
| P180-1  | PY06160 | H2-Kd | IYNNQIKCVI | 34.76 | SNLAIYNNQIKCVIPYI*   | TCTAATTTAGCAATCTATAACACAGATAAAGTGCGTGAAGTCCCTACTATAGTGA    |
| P180-2  | PY06161 | H2-Kd | KYLEIHTLV  | 44.78 | HTRQKYLEIHTLVVFFS*   | CACACTAGGCAGAACTACCTAGAGATCCACACCCCTAGTAGTGTTTTTAGCTGA     |
| P180-3  | PY06175 | H2-Kd | SQLHLLSAI  | 39.44 | TVGNSQLHLLSAISLE*    | ACTGTAGGTAATAGCCAGCTGCACCTGCTGACGCCCATATAAGCTTAGAATGA      |
| P180-4  | PY06175 | H2-Kd | LYAYCHALI  | 47.46 | ERQDLAYAYCHALISCG*   | GAGAGGCGAGGACCTGTACGCCTACTGCCAGGCCCTGATCTGATCGCGTAAAGTGA   |
| P180-5  | PY06191 | H2-Kd | KYCNINFYI  | 9.77  | KRLDKYCNINFYIISNL*   | AAGCGGCTAGATAAGTACTGTAACTCATATAACTTCAATAAAGTAAATTTGTGA     |
| P180-6  | PY06191 | H2-Kd | KYLINDNYI  | 18.48 | PTPSKYLINDNDYIISVI*  | CCAACTCTAGTAAGTACATCTAGATATAAGTAACTAGTGAAGTAACTCTGA        |
| P180-7  | PY06191 | H2-Kd | KYNNNNWNV  | 25.95 | CLKEKYNNNNWNVLTAL*   | TGCTTGAAGAGGAAGTATAATAAATAACTGGAATAACGTGACCTTACGATTTGTGA   |
| P180-8  | PY06191 | H2-Kd | FYSKDMSNL  | 29.54 | AEFTFYYSKDMSNLDKQ*   | GCTGAGTTCACGTTCTATAGTAAGGACATGAGTAACTAGGATGAGTGAAGTGA      |
| P180-9  | PY06193 | H2-Kd | KYSKKFNRI  | 26.92 | HSELKYSKKFNRIQVLA*   | CATAGTGAGCTGAAGTATAGTAAGAAGTTTAAATGAATCCAGGCTAGCTGCTGA     |
| P180-10 | PY06193 | H2-Kd | FYEGNSNEI  | 48.99 | NEVIFYEGNSNEIRPFL*   | AATGAGGTAATCTTCTATGAGGGTAAATAGTAACTAGAGTACCGCCCTTTCTCTGA   |
| P181-1  | PY06198 | H2-Kd | SYFKNYIHI  | 4.9   | SPFWKSYFKNYIHIDIAN*  | TCTTTTTGGAAGAGCTACTTTAAGAAGTACATCCACATAGACATAGCTAACTGA     |
| P181-2  | PY06198 | H2-Kd | SYIHRNTFL  | 5.36  | LQDHSYIHRNTFLGDQV*   | CTGCAGGACCATAGCTACATCCATAGAAACACCTTCTAGGTGACCAAGGTATGA     |
| P181-3  | PY06198 | H2-Kd | NYITNYSSEL | 7.83  | VERQNYITNYSSELSKSG*  | GTAGAGAGGCAGAACTACATAAATAACTAATAGTGAAGCTGTCTTAAGTCTGGTTGA  |
| P181-4  | PY06198 | H2-Kd | KYLTNDMTYL | 15.79 | VARSKYLTNDMTYLAKVH*  | GTAGCTAGGTCTAAGTACACTAATGACATGACCTACCTAGCTAAGGTGACATTTGA   |
| P181-5  | PY06198 | H2-Kd | RYLLGYOPI  | 29.65 | CLVDRLYLLGYOPIKRT*   | TGCTGATAGATAGATACCTGCTGTTCCAGTACCTATAAAGAAGGCAAACTGTA      |
| P181-6  | PY06198 | H2-Kd | KYSYIYAI   | 31.13 | NRIEKYSYIYAIIEGVS*   | AACCGGATAGGAAGTATAGCTACATCTACGCCATAATAGAGGGTAGTGTGTTGA     |
| P181-7  | PY06209 | H2-Kd | KYLFYQSII  | 6.35  | STVGKLYLFYQSIIIMGRV* | TCAACCGGTAGATAAGTAACTGTTCTACCAAGCATGATAGAGTGAAGTGTGA       |
| P181-8  | PY06209 | H2-Kd | SYFDRKDTL  | 8.58  | VFLSYFDRKDTLKHVQ*    | GTCTTCTGCTGAGCTACTTTGATAGAAAGGACACCCCTGAAGCACGCTCCAGTGA    |
| P181-9  | PY06209 | H2-Kd | SYFINMYHI  | 12.77 | RSGDSYFINMYHYLIUK*   | CGTAGTGGTGATAGCTACTCTAAACATGTACTACCTGATAATTTTGAAGTGA       |
| P181-10 | PY06209 | H2-Kd | SFFNFYHII  | 17.02 | LQVYSFFNFYHIIHRSLY*  | CTACAGGTATATAGCTTCTTTAACTCTACCCACCATAGATGATCTCTCTATTGA     |
| P182-1  | PY06209 | H2-Kd | KYYMMYNNM  | 22.27 | NGRVKYYMMYNNMDKAF*   | AACGGTAGGGTGAAGTACTACATGATGTATAAATAACATGAGATAAGCTAGGTGA    |
| P182-2  | PY06209 | H2-Kd | SYVDKMAEI  | 38.95 | NQDESYYVDKMAIEDIAL*  | AATCAGGATGAGGATACGCTAGATAAAGTGGCTGAGATAGAGTACTGCTTTGTGA    |
| P182-3  | PY06210 | H2-Kd | RYNVSNFNI  | 4.69  | NDPPRYNVSNFNIHYGL*   | AATGACCCCTCCTAGATAAAGTGAAGCTTAACTCTACCTCAATTTGATGCTGTGA    |
| P182-4  | PY06214 | H2-Kd | SYMVLASL   | 5.71  | QKPGSYMVLASLTGET*    | CAGAAACCAAGGTAGCTACATGTACATCCTGATGCTGACCGGTGAACCTGATGA     |

|         |          |       |             |       |                       |                                                             |
|---------|----------|-------|-------------|-------|-----------------------|-------------------------------------------------------------|
| P182-5  | PY06214  | H2-Kd | WQPHFYSL    | 13.27 | KAGRWQPHFYSLTQSE      | AAGGCTGGTAGATGGCAGTTCCCTCACTTCTATAAGCCTGACACAGTCTGAGTGA     |
| P182-6  | PY06214  | H2-Kd | IYYKQFOIL   | 43.17 | LSWNIYYKQFOILGYL*     | CTGAGTTGGAACATCTACTATAAGTTCCAGCAGATAATCTAAGGCTACTTAATGA     |
| P182-7  | PY06214  | H2-Kd | LYTCLYTPL   | 47.79 | HQTVLTYTCLYTPLKQSP*   | CATCAGACTGTACTGTACACCTGCCTGTACACCCCTGTAGATGCTCTAAGAACTAGTGA |
| P182-8  | PY06225  | H2-Kd | KYVTKKHYY   | 10.43 | VRCDKYVTKKHYYKYSG*    | GTGAGATGTGATAAGTACGTGACTAAGAAGCACTACATAAAGTATCTCGGCTGA      |
| P182-9  | PY06225  | H2-Kd | YYNGIATSV   | 24.97 | CAYAYYNGIATSVGRFP*    | TGGCGATACGCGTACTATAACGGCATAGCCACTAGCGTAGGCGCGGTTCCCGTGA     |
| P182-10 | PY06225  | H2-Ld | KPLNAYVYSI  | 23.52 | YYFMKPLNAYVYSIKNE*    | TACTACTTCATGAAGCGCTCTAGCTAACGGTGTATAGCATCTCTAAGAACTAGTGA    |
| P183-1  | PY06252  | H2-Kd | KYINNKESL   | 5.41  | TRQRKYINNKESLTFQK*    | ACCCGTCAGAAAGAGTACATAAATAAAGGAGAGCCGTGACTTTCCAGAAAGTGA      |
| P183-2  | PY06252  | H2-Kd | IYVDALSPI   | 13.75 | DALSIYVDSALSIALPP*    | GAGCAGCTGAGCATCTACGTAGATAGCGCGCTGAGCATAGCGGCTCTCCCTCGA      |
| P183-3  | PY06252  | H2-Kd | LYNFLLCPI   | 29.52 | TDRVLYNFLLCPIFQSD*    | ACTGACCGCGTGTCTGATAAECTTCTGCTGTGCGCCATCTTCCAGCTGATTTGA      |
| P183-4  | PY06252  | H2-Kd | SYQYLRYL    | 31.86 | EDCDVSYQYLRYLVLQRL*   | GAAATTGTGATAGCTACCAGTACCTGAGATAACCTGCTAGTGCAGCTGAGATGA      |
| P183-5  | PY06260  | H2-Kd | KYLDNTNHL   | 7.25  | YAENKYLDNTNHLPKQL*    | TACGCTGAGAATAAGTACCTAGATAACACTAACCCCTGCCTAAACAGCTCTGA       |
| P183-6  | PY06260  | H2-Kd | IYNDNMLPI   | 23.07 | ESRFYIYNDNMLPIERG*    | GAATCTAGATTCTACTATAATGATAAATAACCTGCCTATAGATAGTTCGCGCTGA     |
| P183-7  | PY06307  | H2-Kd | KYFPDKNML   | 7.71  | EQPSKYFPDKNMLTWLS*    | GAGCAGCGCTCTAAGTACTTCCCTGATAAGAACATGCTGACCTGGTTAAGCTGA      |
| P183-8  | PY06307  | H2-Kd | KYLNICDSV   | 26.56 | FHKQKYLNICDSVTRMK*    | TTCCTAAGCAGAAAGTACCTGAACATCTGTGATAGCGTGACTCGTATGAAGATGA     |
| P183-9  | PY06311  | H2-Kd | KYIYNENTL   | 5.91  | WPRSKYIYNENTLMAPK*    | TGGCCTCGCTCTAAGTACATCTATAATGAGAACCCCTGATGGCTCCTGAAGTGA      |
| P183-10 | PY06311  | H2-Kd | MYFSTHNAL   | 7.26  | VGCDMYFSTHNALRFML*    | GTAGGATGTGACATGTACTTTAGCACCCATAACGCCCTCGCGTCTCATGCTGTGA     |
| P184-1  | PY06311  | H2-Kd | GYLDLAEI    | 39.28 | DLPGYILDLAEIRITG*     | GACCTCCCCGTAGGCTACATCTAGACCTAGCTGAGATGCGCATACAGAGATGA       |
| P184-2  | PY06348  | H2-Kd | KYIYGNTRI   | 2.77  | IREKKYIYGNTRIPLPO*    | ATAAGAGAGAAAAAGTACATAACCCGTTAAACATAGATACCTCTGCCACAGTGA      |
| P184-3  | PY06348  | H2-Kd | KQFLNYSI    | 11.36 | NIQPKYQFLNYSIQDVF*    | AACATCCAGCCTAAGCAGTTTCTGAACATCTTAGATCATGAGCTGATTTCTGA       |
| P184-4  | PY06348  | H2-Kd | YYIKSDRFI   | 11.69 | YFVPIYIKSDRFIAICA*    | TATTTTGTACCGTACTACATAAAGAGTGATAGATTATAGCCATATGCGCTTGA       |
| P184-5  | PY06348  | H2-Ld | IPFENLQPL   | 39.35 | SAEPIPFENLQPLRGQQ*    | AGCGCTGAGCCGATCCCTTTTGAACCTGCAGCCTCTGCGTGGTCAGCAGTGA        |
| P184-6  | PY06362  | H2-Kd | SQFFNFQKI   | 13.36 | KENQSQFFNFQKIDLRF*    | AAAGAGAACCCAGAGCCGTTCTTTAACTTCAGAAAGATAGATTGGCCCTTCTGA      |
| P184-7  | PY06362  | H2-Kd | FYGNNGNNI   | 16.89 | NEKEFYGNNGNNITLWK*    | AATGAAAAAGAAATTTCTACGGTAAACGGTAATAATAACATAACCCCTGTGGAAGTGA  |
| P184-8  | PY06362  | H2-Kd | FYNPNLCVY   | 19.97 | KFPVYFYNPNLCVYKIQ*    | AAGTTCGCCGCTCTCTATAACCCCTAACCTGTAGCATGACCATGAAGTGA          |
| P184-9  | PY06362  | H2-Kd | YMIKIYFSI   | 34.26 | SAQLYMIKIYFSIHIGP*    | TCAGCTCAGCTGTACATGATAAAGTACATCTTTAGCATCCACATAGGCCCTTGA      |
| P184-10 | PY06362  | H2-Kd | YMKILNTHL   | 43.84 | EGCLMYMKILNTHLSLTR*   | GAGGGATGCTTGTATGTTTCAAGAACCTGCACCCATGCTCCCTGACCCGTTGA       |
| P185-1  | PY06422  | H2-Kd | SYTNFNAL    | 3.77  | QKAQSYTNFNNALEKHE*    | CAGAAGGCTCAGAGCTACATAACTAACCTTTAACGCCCTAGAAAACATGAGTGA      |
| P185-2  | PY06422  | H2-Kd | AYISNTNKI   | 15.84 | IFDEAYISNTNKITP*      | ATCTTTGATGAAGCCTATAATAGTAACACTAATAAGATAGTACAGACCCGATGA      |
| P185-3  | PY06422  | H2-Kd | NYVQNRSVI   | 25.2  | NNIGNYVQNRSVISLLS*    | AATAATATAGTTAACTACGTGCAGAAATAGAAGCGTGATAAGTCTGCTGAGCTGA     |
| P185-4  | PY06422  | H2-Kd | TYISKNDII   | 39.58 | MVKTTYISKNDIIGYVM*    | ATGGTGAAGACAACTACATAAGTAAGAATGACATAATAGGCTACGTAATGTGA       |
| P185-5  | PY06422  | H2-Kd | YYAYKKNVI   | 42.24 | KMEIYYAYKKNVIRQAL*    | AAGATGGAGATTTACTACGCCCTATAAGAAAGAACCGTGAATAAGGCGCCCTCTGA    |
| P185-6  | PY06434  | H2-Kd | RYYENISNI   | 2.83  | SGTLRYYENISNIRFVH*    | AGCGGTACTCTGAGATACTATGAGAAACATAAGTAAACATAGGATTTGTCCATTTGA   |
| P185-7  | PY06434  | H2-Kd | KFMNLSLSKI  | 5.14  | LNESKFMNLSLSKIPMLG*   | CTGAATGAGTCTAAAGTTTCATGAACCGGCTAGTAACTAAGATCCAGTCTGTGTA     |
| P185-8  | PY06434  | H2-Kd | SYNINCFSL   | 6.82  | AEMHSYNINCFSRLTQD*    | GCTGAGATGCATAGCTATAACATAAACTGAGTGTCTTCCGCGCAGCAGGATGA       |
| P185-9  | PY06434  | H2-Kd | SYQINEIVI   | 10.38 | QNWVSYQINEIVILCER*    | CAGAAGCTGGGTGAGCTACATCCAGAAATGAGTATAGTTGATCTCTGTGAGAGTGA    |
| P185-10 | PY06434  | H2-Kd | LYIYHNSYI   | 11.21 | KVSYLYIYHNSYIRAQE*    | AAAGGTGAGCTATCTGTACTACATCCATAATAGTACATAAGAGCAGCAAGATGA      |
| P186-1  | PY06434  | H2-Kd | NYIHSILTI   | 12.46 | TNKVNYIHSILTLRSF*     | ACTAATAAGGTGAACCTACATAATAAGCCACCTGCACCTAGCTGAGGCTTCTGA      |
| P186-2  | PY06434  | H2-Kd | FYSSTLFLV   | 13.9  | SRVVFYSSTLFLVLFWH*    | TCACGAGTAGTGTCTATAGTAGACCCCTGTTCTGCTGCTTCTCACACTGGTGA       |
| P186-3  | PY06434  | H2-Kd | SYNSSFQEI   | 16.6  | KQSTSYNSSFQEIQINCL*   | AAACAGTCCACTAGCTATAAATAGTAGTAGTGAGGAGATAAACTGTATCTCCTGA     |
| P186-4  | PY06434  | H2-Kd | KYVILTDTI   | 16.96 | APQPKYVILTDITVYLL*    | GCTCCACAGCCTAAGTAGACGTGATCCTGACTGACACCATAGATCTGCTGTGTA      |
| P186-5  | PY06434  | H2-Kd | KYVINLNNL   | 19.94 | PDERKYVINLNNLGAEV*    | CCTGATGAGAGAAAGTACGTGATAAACCTGAATAACCTAGGGCGTGAAGATGA       |
| P186-6  | PY06434  | H2-Kd | KWLSSQSI    | 20.71 | EAKKKWLSSQSITHVIV*    | GAAGCTAAGAAGAAAGTGGCTGAGTAGCCAGAGCATATAACTACGATGCTCTGA      |
| P186-7  | PY06434  | H2-Kd | LYNLNFNLF   | 33.52 | CAYQLYNLNFNLFHRGP*    | TGTGCTTATCAACTGTATAACCTGAACTTTAACTTCTCCTGAGGATGGACCTGA      |
| P186-8  | PY06434  | H2-Kd | LYLFMKNFYNI | 46.82 | LQAAFLYLFMKNFYNLSDR*  | CTTCAAGCAGCCCTGTTTCATGAAGAACCTTTAACTACATAGATCTAGATCGGTGA    |
| P186-9  | PY06434  | H2-Kd | IFSNNSPSI   | 49.47 | NVSEIFSNNSPISPTQT*    | AACGTGAGTGAGATCTTTAGTAATAACATAAGCCCTATCTCCGACAGCACTGA       |
| P186-10 | PY06434  | H2-Ld | LPINFNPI    | 24.25 | WSVALPINFNPIPLYLD*    | TGGTCCGTAGCTCTGCCATCTTTAACTCTAACCCCTATCGCTGACTTAGACTGA      |
| P187-1  | PY06446  | H2-Kd | IYVEITPL    | 20.54 | SSKYIYVEITPLFCRD*     | AGTTCTAAATATCTACGTAGAGATAAATACCCCTCTGTTCTGTAGAGATTGA        |
| P187-2  | PY06459  | H2-Kd | MYLTAHEKI   | 17.37 | DESKMYLTAHEKITPIP*    | GATGAAAGTAAAGTGTACCTGACCCGCCATGAGAAGATAACCCAAATTCATGTA      |
| P187-3  | PY06460  | H2-Kd | YLLRLSHQL   | 42.15 | RLGVYLLRLSHQLPLED*    | CGTTTAGGTTCTACTACCTGCTGCTGAGCCACAGCTGCTCTAGAAAGATTGA        |
| P187-4  | PY06465  | H2-Kd | KYLNSLVMI   | 5.38  | ADGQKYKYLNSLVMIDES*   | GCTGACGGCCAGAAAGTACCTGAATAGCCTAGTGATGATAGATGAAGAGTCTGA      |
| P187-5  | PY06587  | H2-Kd | IYIQISNFI   | 8.43  | YSEMIYIQISNFIGFHT*    | TATAGTAAATGATCTACATCCAGATAAGTAACTTCTATAGGATTTACACACTGA      |
| P187-6  | PY06587  | H2-Kd | KYLITIIISI  | 12.82 | NKRAKYKYLITIIISALAE*  | AATAAGCGGGCTAAGTACCTGCTGACCATATAAAGCATCTGAGGTGAGTCTGA       |
| P187-7  | PY06587  | H2-Kd | FYSKLLTII   | 17.61 | LPNRFYSKLLTILRKE*     | CTGCCATAATAGGTTCTATAGTAAGTACCTGCTGACCATCTGAGGAAGAGTGA       |
| P187-8  | PY06587  | H2-Kd | SFIGINNIN   | 23.9  | FSLCSFIGINNINICAE*    | TTCTCACTGTGAGTCTTATAGTAAACATAAATAACATCTGCGCTGAGTCTTGA       |
| P187-9  | PY06601  | H2-Kd | RQWGNWNYI   | 15.29 | LLNPRQWGNWNYIDGQI*    | CTACTGAACCCTAGACAGTGGGGTAACCTGGAACATACATAGACGGACACTGTA      |
| P187-10 | PY06601  | H2-Kd | MYHYFMTEI   | 19.41 | TGMYMYHYFMTEIETSL*    | ACTGGCTACATGATGTACCACTACTTCAATGAGTACATGAGTACAGGCTCCTTGTGA   |
| P188-1  | PY06601  | H2-Ld | YPWKEISIP   | 27.26 | WQHMYPWKEISIPFFAC*    | TGGCAGCATATGTACCCTTGGGAGATAAGCATCCCTTCTTTTTTGATCATTTGA      |
| P188-2  | PY06632  | H2-Kd | RYKNNLITI   | 9.3   | GTSEYKNNLITITISIA*    | GGAACCTAGTGAGAGATAAAGAATAAACCTGACCAATAAGCTCCATAGCCTGTA      |
| P188-3  | PY06632  | H2-Kd | NYNCCNDYL   | 21.61 | LACINYNYCNLDYLGYRA*   | CTAGCATGTATAAACTACTACTGTAACCTAGACTACCTAGGCTACCGGGCTTGA      |
| P188-4  | PY06632  | H2-Kd | IYLRILHYI   | 30.8  | CVRTIYLRILHYICRLQ*    | TGTGCTCCGTACCATCTACCTGAGACACCTGTACATAATCTGTAGGCTGAGTGA      |
| P188-5  | PY06638  | H2-Kd | IYFEQNSI    | 10.73 | HIGFIYFEQNSIFCPT*     | CACATAGGCTTTATCTACTTCTATGAGCAGAAATAGCATCTTGTGCCGACATGA      |
| P188-6  | PY06638  | H2-Kd | YIKNNGINI   | 42.38 | LENINYIKNNGINIRCI*    | CTAGAGAACATAAACTACATAAAGAATAACCGTAACTAATACGTGAATATGA        |
| P188-7  | PY06638  | H2-Kd | GYRQNNKI    | 45.53 | SRTIYYRQNNKIRSKA*     | TCTAGGACCATAGGCTACTATAGACAGAATAAAGATAAGGTCTAAAGCTTGA        |
| P188-8  | PY06648  | H2-Kd | YYLDKVENI   | 11.89 | VPEAYYYLDKVENIMSKC*   | GTCCCTGAGGCGTACTACCTAGACGTGAAGGAGAGACATAATGTCTAAGTGCTGA     |
| P188-9  | PY06648  | H2-Kd | KYLKSKLDI   | 42.94 | YAE DKYLKSKLDILQKL*   | TATGCTGAAGATAAGTACCTGAAGAGTAAAGTACATGACCATCTCGAAGCACTGTGA   |
| P188-10 | PY06695  | H2-Kd | EYITITFSEI  | 25.74 | INFKEYITITFIRGNS*     | ATAAAATTTTAAAGAGTACATAAACCATCTACTTACCATAAGGGGTAACTCTGA      |
| P189-1  | PY06703  | H2-Kd | LYNIGNNFI   | 18.44 | PRCLYLYNIGNNFIIMSOG*  | CTGCCCCGGTGTCTGTATAACATAGGTAATAGTAACTGATGATGATGATGATGA      |
| P189-2  | PY06739  | H2-Kd | KYLDIAISI   | 4.62  | EPVDKYLDIAISIARAE*    | GAACCATGATAGTAAGTACCTAGACGCCATCTATAGCATAGCCCGGGCTGAGTGA     |
| P189-3  | PY06739  | H2-Kd | FYVYVNIISI  | 16.58 | LTLGFYVYVNIISIAMYP*   | CTGACTTAGGATTTACGTGTACGTGAGACACCTGTACATAATCTGTAGGCTGAGTGA   |
| P189-4  | PY06739  | H2-Kd | KYANSNYNL   | 34.2  | AQIRKYANSNYNLVDGE*    | GCCAGATACGTAAGTACGCTAATAGTAACTATAACCTAGTAGACGGTGAATGA       |
| P189-5  | PY06739  | H2-Kd | YANSNYNL    | 34.2  | PGSRRYANSNYNLGDDT*    | CCCCGCTCACGTAGATACGCTAATAGTAACATAACCCCTAGGTGACCAACCTGA      |
| P189-6  | PY06739  | H2-Kd | KYANSNYIL   | 34.2  | STVAKYANSNYTLTIS*     | TCCACTGTAGCTAAGTACGCTAATAGTAACCTAGACCACTGATCTTAACTCATGA     |
| P189-7  | PY06739  | H2-Kd | YANSNYNL    | 34.2  | KSRFRYANSNYNLRSIS*    | AAGAGTAGATTAGATACGCTAATAGTAACATAAAGTACCTGCGTAGCATCTCATGA    |
| P189-8  | PY06767  | H2-Kd | QYHGYNYSVI  | 17.67 | NMWLQYHGYNYSVIDSP*    | AACATGTGGCTTTCAGTACACCGGCTATAAATAGCGTGATACGATGACTCCCATGA    |
| P189-9  | PY06767  | H2-Kd | KYLQIQLI    | 46.53 | SAQTKYLQIQLIFMEL*     | TCCGCTCAAACCTAAGTACCTAGGCCAGATAAATAAGATCTTTCATGGAACATGA     |
| P189-10 | PY06772  | H2-Kd | RYIYSYGD    | 19.81 | HNSGRYIYSYGDILLAM*    | CATAACTCGGGTAGATACATCTATAGCTACGGTGACATCTGCTGATGCTATGTA      |
| P190-1  | PY06772  | H2-Kd | KYIGLLKKL   | 42.19 | KALDKYIGLLKKLHLTI*    | AAAGCTCTAGATAAGTACATAGGCCTGCTGAAGAAGCTGACATGACTATCTGA       |
| P190-2  | PY06781  | H2-Kd | KYNFSPGKI   | 34.49 | SIPTKYKNFSPGKIPTWN*   | AGCATACCCACTAAGTATAAECTTTAGCCCTGGTGAAGTACCCACATGGAATTGA     |
| P190-3  | PY06844  | H2-Kd | SYISNNIFI   | 4.37  | WRGISYISNNIPIPPDQ*    | TGGAGAGGTATAAGCTACATAAGTAATAACATCTTCTATCCCTCCTGATCAGTGA     |
| P190-4  | PY06844  | H2-Kd | YYNAISSIL   | 7.42  | LQDVYNYNAISSILMPIM*   | CTGCAGGAGCTACTACTATAACGCCATAAGTAGCATCTGATGCCATAATGGATGA     |
| P190-5  | PY06844  | H2-Kd | EYYNAISSI   | 16.43 | TAQAEYYNAISSIKSDG*    | ACTGCTCAGGCTGAGTACTATAACGCCATAAGTAGACATAAAGCTGTACCGGGTGA    |
| P190-6  | PKY06844 | H2-Kd | CYFEYRFLI   | 19.8  | IEVECYFEYRFLIRVMW*    | ATAGAAGTAGAAGTCTACTTTGAGTATAGATTCTCATCTGAGGGTGAATGGGATGA    |
| P190-7  | PKY06844 | H2-Kd | VYNDFYVTI   | 21.25 | KNKEVYNDFYVTITCPLV*   | AAGAATAAAGAAAGTGTATAAAGTACTTACTACACCATCTGCTGCTTATGTGTA      |
| P190-8  | PKY06844 | H2-Kd | KYLFCLFML   | 30.46 | MVTRKYLFCLFMLKASN*    | ATGGTAAGTGAAGTACCTGTTCTGCGTGTTCATGCTGAAGGGTCTTCAACTGA       |
| P190-9  | PKY06861 | H2-Kd | KFYDAFSTL   | 19.94 | VLVTKFYDAFSTLKFQNI*   | GTGCTAGTACTAAGTTCTATGACGCGCTTTAGCACCTGAAATTCAGAACTGA        |
| P190-10 | PKY06861 | H2-Kd | YYTKNNIIS   | 22.25 | QGSSYYTKNNIINHATF*    | CAGGGTAGTAGCTACTACACTAAGAATAACATAAACAATAATCATGCCAGTGA       |
| P191-1  | PKY06861 | H2-Kd | FYVILYISL   | 49.35 | FTKEFYVILYISLVDKG*    | TCTACTAAGAAATTTCTACATAGTCTGATACATAAGCTCTAGTATAAAGGATGA      |
| P191-2  | PKY06873 | H2-Kd | FYMLTAHSL   | 5.35  | ADSNFYMLTAHSLLSF*     | GCTGATAGTAATTTCTACATGCTGACCGCCCATAGCCTGCTCCTGAGCTTTTGA      |
| P191-3  | PKY06873 | H2-Kd | AYSNLVCYI   | 25.93 | DLEDAYSNLVCYIDVPF*    | GATCTAGAGGATGCCTATAGTAACCTGTGCGGTGTACATAGATGTTCCTCTCTGA     |
| P191-4  | PKY06873 | H2-Kd | TYFTIPKL    | 29.03 | LPAQTYFTIPKLQTNH*     | CTCCAGCTCAGACCTACTACTTACCATCTGACCTGATGACGACTAATCACTGA       |
| P191-5  | PKY06924 | H2-Kd | YYSVVCGL    | 30.95 | ESALYYSVVCGLPSSG*     | GAATCCGCCCTGTACTATAGCTACGTGTGCGGTGAGCTGCCATCTGGCTCATGA      |
| P191-6  | PKY06924 | H2-Kd | KYSGCELNL   | 44.11 | FPGSSYKYSYSGCELNLPWC* | TCCACGGGCTGTAGCTACGTGTGCGGTGAGCTGACCTGTTTCCCTGGTGGTGA       |
| P191-7  | PKY06925 | H2-Kd | KMKNHFFSI   | 20.57 | NRQGMKNHFFSSIPONP*    | AACCGCCAGGGTAAAGTGAATAAGCACTTTAGCTAGCATCCCCAGAACTCATGA      |
| P191-8  | PKY06986 | H2-Kd | FYQSTLSLV   | 18.37 | ESIGFYQSTLSLVQISR*    | GAGAGCATAGGATTTCTACCAGAGCACCTGAGCCTAGTGCAGTACTCTGAGGTGA     |
| P191-9  | PKY06986 | H2-Kd | LYFVNERSI   | 26.46 | LLSPLYFVNERSIGDRI*    | CTGCTGAGTCTCTGTACTTCTGTAAGTGAAGAGCATAGGTGATCGGATCTGA        |
| P191-10 | PKY07005 | H2-Kd | KYNNSSLHI   | 5.66  | HNLCMYNNSSLHIIMSL*    | CATAAECTGTGCATGTATAATAGTACCTGCACATAATAATGTCTGCTGAAGTGA      |
| P192-1  | PKY07005 | H2-Kd | KYQGNDSI    | 6.76  | MNELKYQGNDSITQIC*     | ATGAATGAACCTGAAGTACCAGGGCATAAATGATAGCATAAAGCTGATGCTTGA      |
| P192-2  | PKY07005 | H2-Kd | YIYSLVKNI   | 13.59 | TVLAYIYSLVKNILRDL*    | ACGGTGCTAGCATACTACATAAGGCTAGTGAAGAGACATCTGAGGAGCCTGTGA      |
| P192-3  | PKY07005 | H2-Kd | FYFNIYFL    | 18.15 | KSILIFYFNIYFLTKGT*    | AAATCCCTGATATTTCTACTTTAAACATCTACCTGTTCTGCTGACGACTACTGA      |
| P192-4  | PKY07005 | H2-Kd | RYKQHLNLL   | 43.98 | LYVTRYKQHLNLLGRLT*    | TTATATGTGACTAGATATAAGCAGCACTGAATAACCTAGGTAGACTGACCTGA       |
| P192-5  | PKY07026 | H2-Kd | NYIVHISL    | 43.64 | LYEVNYIVHISLEPR*      | CTGTATGAGGTGAACCTACATCTCGTGACACATAAGCCCTGACAGCACTAGATGA     |

|         |         |       |            |       |                     |                                                           |
|---------|---------|-------|------------|-------|---------------------|-----------------------------------------------------------|
| P192-6  | PY07039 | H2-Kd | IYLCCFSNI  | 7.74  | DVPHIYLCCFSNINYHC*  | GACGTTCCCTCATATCTACCTGTGCTGCTTTAGTAACATAAAATACCATTGTTGA   |
| P192-7  | PY07039 | H2-Kd | YYLNIKKNI  | 38.13 | FGQLYYLNIKKNIPLIEE* | TTCCGGACAACTGTACTACCTGAACATATAAGAGAACATCCCCTAGAGGAGTGA    |
| P192-8  | PY07039 | H2-Kd | KSIFMYSLI  | 40.83 | SLTTKSFIMYSLIHTDA*  | TCTCTGACCACTAAGAGCATCTTCATGTATAGCCTCATCCATGACGCATGA       |
| P192-9  | PY07061 | H2-Kd | FYTLTLSEI  | 11.84 | LKSIFYTLTLSEINFSK*  | CTGAAGTCTATCTTCTACACCCGTGACCCTGAGTGAGATAAATTTCTCTAAGTGA   |
| P192-10 | PY07061 | H2-Kd | IYSQNIKI   | 14.27 | HCRIYYSQNIKNIEAVV*  | CACGTGTCGGTATATCTATAGCCAGAACATAAAGATAGAGGCCGCTAGTATGA     |
| P193-1  | PY07061 | H2-Kd | YKDTHPQI   | 17.77 | SVVIYKYDTHPQIGSLI*  | TCTGTAGTGATTACTATAAGGACACCCCAACTCAGATAGTCTGCTGTGA         |
| P193-2  | PY07061 | H2-Kd | FYSFYTLTL  | 39.03 | SRSFYFYSFYTLTYRFY*  | TCTAGGTCCTTTTTCTATAGCTTCTACACCCGTGACCCTGTATAGGTTCTACTGA   |
| P193-3  | PY07067 | H2-Kd | SYFFLLYAI  | 5.49  | FFSASYFYLLYAILDQC*  | TTTTTTAGTGCTAGCTACTTCTTCTGCTGACGCCATCCAGCCAGTGCTGA        |
| P193-4  | PY07067 | H2-Kd | SYRSSNSSI  | 8.77  | KEQNSYRSSNSSSITGHG* | AAGGAACAGAATAGCTATAGAAGTAGTAATAGTAGCATAACAGGCCACGGTTGA    |
| P193-5  | PY07067 | H2-Ld | KPNANLSLF  | 31.98 | HLQQKPNANLSLFGNAP*  | CACCTCCAGCAGAACGCTAACGCTAACCTGAGCGTGTTCCGGTAACCGCTCATGA   |
| P193-6  | PY07101 | H2-Kd | VYIWGTFYI  | 4.87  | IMAFVYIWGTFYIYNGY*  | ATAATGGCGTTCGTGTACATCTGGGGCACCTTCTACATCTATAACGGCTATTGA    |
| P193-7  | PY07101 | H2-Kd | SYNSYIHKL  | 9.57  | FVDQSYNSYIHKLOGL*   | TTCGTAGATCAGAGCTATAATAGCTACATCCATAAGCTGCAAGGGGGTCTCTGA    |
| P193-8  | PY07154 | H2-Kd | NYFKAAREL  | 40.95 | AYAKNYFKAARELASRV*  | GCATACGCTAAAACTACTTTAAGGCCGCCGTAGAGCTAGCCTCTAGAGTCTGA     |
| P193-9  | PY07154 | H2-Ld | IPFYNKLIL  | 43.67 | LMLQIPFYNKLILRPSR*  | CTAATGCTTCAGATCCCTTCTCTATAAAGCTGATCCTGCCGCCCTCTAGATGA     |
| P193-10 | PY07179 | H2-Kd | KYNGIHSYI  | 3.48  | IRNQKYNIGIHSYIDGDH* | ATAAGAAACCCAGAAAGTATAACGGCATCCATAGCTACATAGACCGGTGACCATGA  |
| P194-1  | PY07179 | H2-Kd | SYNNFNISI  | 5.3   | FLSVSYNNFNISIIDTPH* | TTTTCTCAGTGAGCTATAATAACTTTAATAGCATATAAGACACCCCAAGCTGA     |
| P194-2  | PY07179 | H2-Kd | SYSTICINI  | 7.42  | GGSGSYSTICINIQYNF*  | GGCGGATCTGGTAGCTATAGCACCCACCATCTGTAAATCCAGTATAAATTTCTGA   |
| P194-3  | PY07179 | H2-Kd | NYIHNKYQI  | 9.12  | VLGQNYIHNKYQITSLP*  | GTGTTAGGGCAGAACTACATCCATAAAGTACCAGATAACATCCCTCCCTGTA      |
| P194-4  | PY07179 | H2-Kd | KYIYIKYGI  | 10.94 | SALWKYIYIKYGIPEPV*  | TCTGCACTGTGGAAGTACATCTACATAAAGTACGGCATCCCACTGAGGTGTGA     |
| P194-5  | PY07179 | H2-Kd | SYFLACDNI  | 12.01 | LHKKSYFLACDNIQAAG*  | CTGCATAAAAAAGCTACTTCTAGCCTGTGATAAATCCAAAGCAGCCGGTGA       |
| P194-6  | PY07179 | H2-Kd | KYIDFKKSL  | 24.56 | IIEPKYIDFKKSLDQSK*  | ATAGAAGAGCCTAAGTACATAGACTTTAAGAAGAGCCTAGATCAGTCTAAGTGA    |
| P194-7  | PY07179 | H2-Kd | NYIDNDFLI  | 30.5  | SRAWNYIDNDFLIHLQ*   | TCTAGGGCCTGGAACCTACATAGATAATGACTTCTCGATGCTTGTCTAGCATGA    |
| P194-8  | PY07179 | H2-Kd | YSYNNFNISI | 32.77 | TDHTYYSYNNFNISIKIP* | ACTGATCATACTTATAGCTATAATAACTTTAATAGCATAAAAATTTCCCTAAGTGA  |
| P194-9  | PY07179 | H2-Kd | AYMDSNGKI  | 34.98 | ERLTAYMDSNGKISGSP*  | GAGCGGTTGACAGCCTACATGGATAGTAACCGTAAGATCTAAGGATCCCTTTGA    |
| P194-10 | PY07196 | H2-Kd | YYINSNYFI  | 2.66  | FQLSYINSNYFIIAASP*  | TTTCAGCTGAGCTACTACATAAATAGTAACCTACTTCTATAGCTGCTAGCCCTGA   |
| P195-1  | PY07196 | H2-Kd | YINDNTNFI  | 7.09  | IPMPIYINDNTNFTIDRH* | ATTCCATGCGCAATCTAATGATAACACTAAGCTTCTACATGACGCCCATTTGA     |
| P195-2  | PY07196 | H2-Kd | SYNAIYVI   | 8.04  | SDQNSYNAIYVICGGT*   | TCTGACCAAAATAGCTATAACGCCATAGCCTACGCTGATCTGTGTCTAGACCTGA   |
| P195-3  | PY07196 | H2-Kd | YVPIRGKI   | 11.49 | IRDTYVPIRGKIFNP*    | ATTCTGATACGTACTACGTGCCTATAAGAGGTAAAGATAATATGTTCCCTGA      |
| P195-4  | PY07196 | H2-Kd | LYFYDFPFI  | 15.96 | SERDLYFYDFPFITLEC*  | TCTGAAAGGGATCTGTACTTCTATGACTTCCCTTTCATAACTCTAGAGTGTGA     |
| P195-5  | PY07196 | H2-Kd | LYFVSLQAI  | 23.29 | EQFSLFYFVSLAIRKCV*  | GAACAAATTTTCCCTGTACTTCTGAGGCCAGCTAGCCATCCGTAATGCGTTTGA    |
| P195-6  | PY07196 | H2-Kd | KYVIVSIL   | 38.41 | IFIDKYVIVSILGRALH*  | ATTTTCATAGATAAGTACGTAGTATGATGAGCATCTAGGACCGGTGACCATGA     |
| P195-7  | PY07214 | H2-Kd | KYIFQSSLL  | 11.07 | YAAMKYIFQSSLLGLRF*  | TATGCTGCTATGAAGTACATCTCCAGAGTAGCCTGCTAGGGTGTGAGATTTTGA    |
| P195-8  | PY07214 | H2-Kd | KFLYTLNFI  | 43.02 | LYQDKFLYTLNFIILFTR* | CTGTACCAGGATAAGTTTCTGTACACCCCTGAACTTCTACTTCTCTGATGA       |
| P195-9  | PY07228 | H2-Ld | SPYLSFFFL  | 21.21 | WKGSPYLSFFFLSSSHH*  | TGGAAGAAAGGTAGCCCTTACCTGAGTAGCTTCTTCTGCTCCTCCACCAATTGA    |
| P195-10 | PY07248 | H2-Kd | YIENSNNQL  | 12.72 | EASAIYIENSNNQLSL*   | GAGGCATCCGCTATCTACATAGAGAATAGTAACCAAGCTGAATAGCCTACTTTGA   |
| P196-1  | PY07248 | H2-Kd | SEFGFFHNI  | 33.66 | FELLSEFGFFHNIKKCG*  | TTTGAGCTGCTGAGTGAGTTCGGCTTCTCCATAACATAAATAAATGCGGGTGA     |
| P196-2  | PY07248 | H2-Kd | HYNEIWWEL  | 46.2  | SGKKHYNEIWWELIGTD*  | TCAGGTAAAAAACACTATAATGAGATAGTGTGGGAGCTGATGGAGCTAGATTGA    |
| P196-3  | PY07292 | H2-Kd | IYYSNIPQI  | 4.57  | ARSIYYSNIPQIPTPQ*   | GCTCGTCCCGAATCTACTATAGTAACATCCCTCAGATCCCACTCCGCACTGA      |
| P196-4  | PY07320 | H2-Kd | KYRYNFNKI  | 20.36 | AHFQKYRYNFNKIGTFF*  | GCCCACTTCCAGAGTATAGATATAACTTTAATAAGATAGGGAGCTTTTTCTGA     |
| P196-5  | PY07326 | H2-Kd | SYINGDLNL  | 12.86 | DANFSYINGDLNLQPLR*  | GATGCTAACTTTAGCTACATAACCGGTGACCTGAACCTGACCGCTTAAGATGA     |
| P196-6  | PY07326 | H2-Kd | TYIHINEL   | 13.75 | YIPLTYIHINELFHPK*   | TATATTTCCCTGACCTACATCCACCACATAAATGAGCTGTCCATCCTAAATGA     |
| P196-7  | PY07326 | H2-Kd | IYNTGKCSI  | 23.78 | ESDSIYNTGKSGISAGT*  | GAGTCTGACTCAATCTATAACACCCGGTAAGGGTAGCATAGGAGCTGGGACGTGA   |
| P196-8  | PY07326 | H2-Kd | GYLLEDVSEI | 28.17 | SSQYGYLLEDVSEILSQE* | TCTTCTCAGTACGGCTACCTGCTAGACGTGAGTGAGATCCTGAGCCAGGAATGA    |
| P196-9  | PY07326 | H2-Kd | NYHCNFCVI  | 46.64 | NATENYHCNFCVICTACL* | AACGCAACTGAAAACTACCAGTGAACCTGTGCTGTGACATAACAGCTGTCTGTA    |
| P196-10 | PY07355 | H2-Kd | NYFVNYINI  | 18.72 | LDEGNYFVNYINISQEL*  | CTAGATGAGGGTAAGTACTTCTGCTGACCTACATAAAGCTATCCCAAGAACTTTGA  |
| P197-1  | PY07355 | H2-Kd | EYFAMPNII  | 26.59 | VFEPEYFAMPNIIKEN*   | GTTTTGTAGCCTGAGTACTTCCGCTACCTAACATAAAGGTGTGAGAATTGA       |
| P197-2  | PY07390 | H2-Kd | SYIPFHFI   | 3.17  | EFFQSYIPFHFIYILL*   | GAATTCCTCCAGAGCTACATCCCTTTCCACTTCCCTATAATTAACCTGCTGTGA    |
| P197-3  | PY07392 | H2-Kd | LYFYMSCVI  | 7.91  | QKTFLFYFYMSCVITFWS* | CAGAAGACTTTCCTGTACTTCTACATGAGCTGCGTGATAAACCCTTCTGGTCATGA  |
| P197-4  | PY07392 | H2-Kd | YYENRISSL  | 20.11 | NFEKYENRISSLQLII*   | AACTTTGAAGTACTATGAGAATAAGAATAAGTAGCCTGCAACTAATAATCTGA     |
| P197-5  | PY07392 | H2-Kd | YYLQTGNDI  | 32.74 | VLVDYLYLQTGNDIAPNS* | GTGCTAGTAGATTACTACCTGCAGACCGGTAAATGACATAGCTCCTAACTCATGA   |
| P197-6  | PY07392 | H2-Kd | TYISNYGYV  | 38.51 | CARDTYISNYGYVELHL*  | TGCGCCCGTGACACCTACATAAGTAACCTACCGCTACGTAGAGTTGCACTGTGA    |
| P197-7  | PY07392 | H2-Kd | IYSDTPYII  | 40.79 | GIQLIYSDTPYIIFYTS*  | GGAAATTCAGCTAATCTATAGTGACACCCCTTACATAATCTTTTACACTAGCTGA   |
| P197-8  | PY07392 | H2-Kd | FYRTVDDNI  | 49.39 | LYTSFYRTVDDNIVEYV*  | CTTTACACCTCTTTCTATAGAACCCTGAGATAGATAACATAGATAAATATGTGTGA  |
| P197-9  | PY07416 | H2-Kd | IYQNNRINI  | 13.91 | RHSRIYQNNRINILFLA*  | AGACATTCACGCTACTACCAGAAATAAGAATAAACATCCTGTTCTAGCTTGA      |
| P197-10 | PY07416 | H2-Kd | SYTEIYENI  | 17.47 | RHVISYTEIYENIVVTD*  | AGGCACGTAATAAGCTACACTGAGATCTATGAGAACATAGTAGTAAGTACTGACTGA |
| P198-1  | PY07416 | H2-Kd | GYNNNMMLI  | 26.67 | CQFGGYNNNMMLICGSI*  | GTGCAGTTCCGCGGCTATAATAATAAACATGCTGATCTGCGGATGCCATCTGA     |
| P198-2  | PY07416 | H2-Kd | NYNNIYPNI  | 31.02 | QAPANNNIYPNICATA*   | CAGGCACCCGCTAACTATAATAACATCTACCTCAACATCTGCGCTACCCGCTGA    |
| P198-3  | PY07424 | H2-Kd | YYSPPSYAI  | 4.5   | PMKHYYSPSSYAIFGQG*  | CCAATGAAGCACTACTATAGCCCTAGTAGCTACGCCATCTTCCGGCAGGGGTGA    |
| P198-4  | PY07424 | H2-Kd | FYHDHFVNI  | 12.72 | LVLKFYHDHFVNIHSEL*  | TTAGTGTTAAAGTTCTACCATGACCACTTCTGTAACATCCATAGTGAGCTGTGA    |
| P198-5  | PY07424 | H2-Kd | AYFRNSNLL  | 19.64 | HGAKAYFRNSNLLTASR*  | CATGGCGCTAAGGCGCTACTTTAGAAATAGTAACCTGCTGACAGCGCTCTCGATGA  |
| P198-6  | PY07428 | H2-Kd | TYKNNVQNL  | 17.37 | ELTCTYKNNVQNLIEKE*  | GAACTGACTTGACCTACATAAAGAACGTGACAGAACCTAGAGGAGAAACCTGA     |
| P198-7  | PY07453 | H2-Kd | IYNNLLNII  | 13.8  | GAEVINYNNLLNIIETKE* | GGTGCTGAAGTAACTATAATAACCTGCTGAACATAAGAGACTAAGGAGTGA       |
| P198-8  | PY07453 | H2-Kd | LYIEQMDOI  | 39.59 | SPATLYIEQMDOIQRVM*  | TCTCCTGCTACGCTGTACATAGAGCAGATGGACCCCTATCCAGCGGGTGATGTGA   |
| P198-9  | PY07453 | H2-Ld | RPLAESFNM  | 45.59 | VHQFRPLAESFNMRIAA*  | GTCCATCAATTTAGACCTCTAGCTGAGAGCTTTAACATGCGCATAGCTGCCCTGA   |
| P198-10 | PY07489 | H2-Kd | VYNKVCVDL  | 44.08 | IGFVYNKVCVDLMRDM*   | ATAGGGTTTTGGTGTGTATAATAAGGTGTGTGACGTGCTGATGCGTGACATGTGA   |
| P199-1  | PY07492 | H2-Kd | SYEYENGII  | 13.93 | YESKSYEYENGIEIKCTA* | TATGAGTCTAAGAGCTACTATGAGAACGGTGAGATAAAGGTGACTGCTCCTGA     |
| P199-2  | PY07549 | H2-Kd | YYVTLLRFI  | 21.62 | SPRGYYVTLLRFIIPPPA* | AGTCCC CGCGGATACCTACGTGACCTGCTGAGATTATCCCTCCCCCGCTTGA     |
| P199-3  | PY07584 | H2-Kd | IYFFNKIFI  | 11.95 | IPQAIYFFNKIFILAGS*  | ATCCCACAGCGCATCTACTTCTTTAATAAGATCTTATCCTAGCAGGATCCTGA     |
| P199-4  | PY07596 | H2-Kd | VYINNDSYI  | 5.42  | SQFIVYINNDSYIAPAV*  | AGTCAAGTTTATAGTGTACATAAATAATGATAGCTACATAGCACTGCCGATGA     |
| P199-5  | PY07596 | H2-Kd | SFFNTINQI  | 11.85 | DIATSFNTINQIDPMA*   | GACATAGCCACTAGCTTCTTTAACACCATAAACAGATAGATCCAATGGCATGA     |
| P199-6  | PY07596 | H2-Kd | AYSNNHNI   | 18.21 | LDQATYSNNHNIHALNA*  | CTAGACCAGACCGCTATAGCTATAATAACCATACATAGCCCTGAACCGATGA      |
| P199-7  | PY07598 | H2-Kd | EYNNNLYSI  | 20.81 | HVSLEYNNNLYSIRQVT*  | CACGCTGAGCTTAGAGTATAATAAACCTGTATGACATCCCGCAAGTAACTGA      |
| P199-8  | PY07654 | H2-Ld | FPWKNHLV   | 45.56 | DGLPFPWKNHLVVPYSS*  | GACGGACTGCCCTCCCTTGGGAAGAACCTAGTAGTGCCATATAGTCTTCTGA      |
